# Supplementary material for: The pelvic organs receive no parasympathetic innervation
Source: eLife journal article supplement (doi:10.7554/elife.91576), 2023-10-17

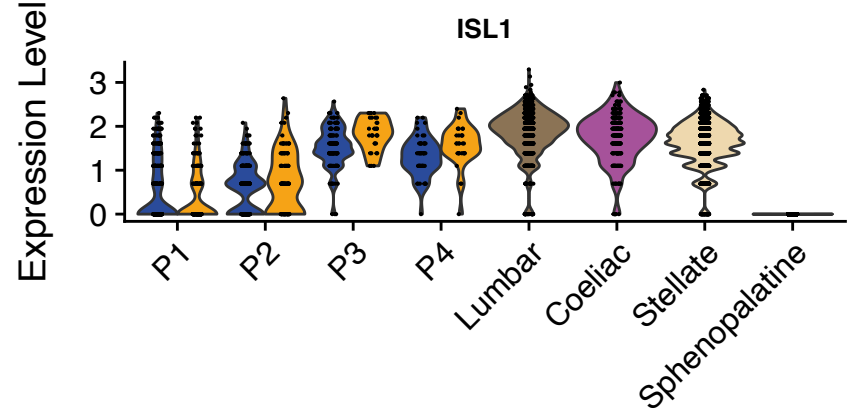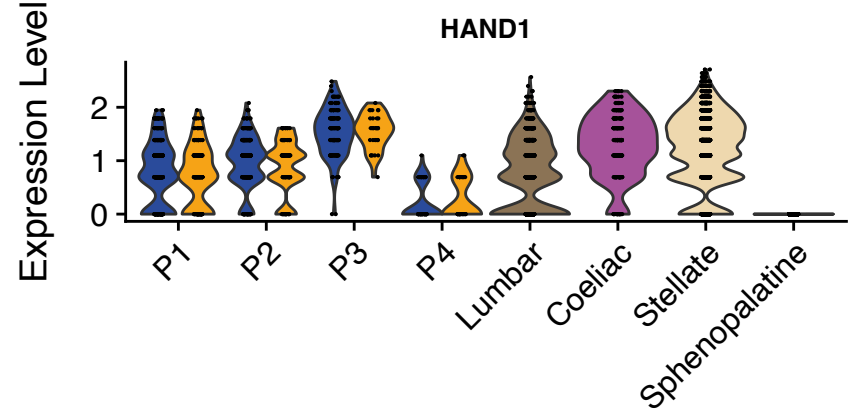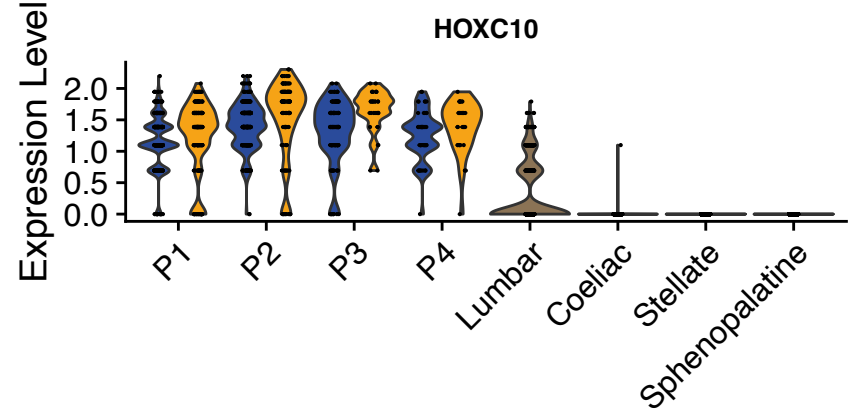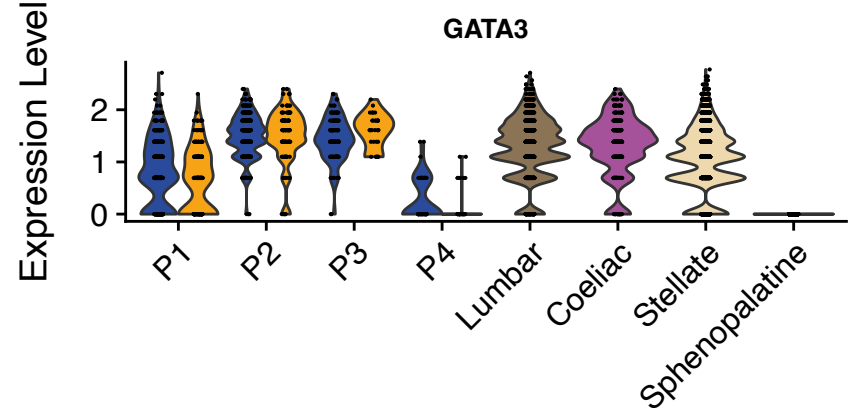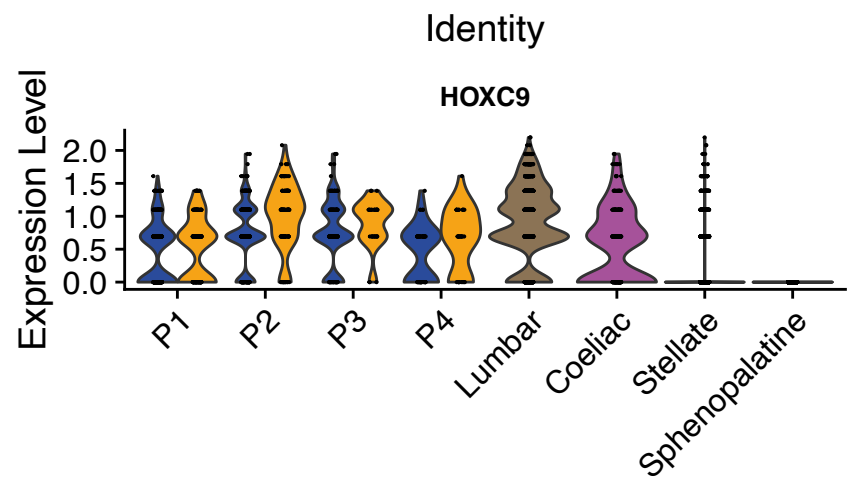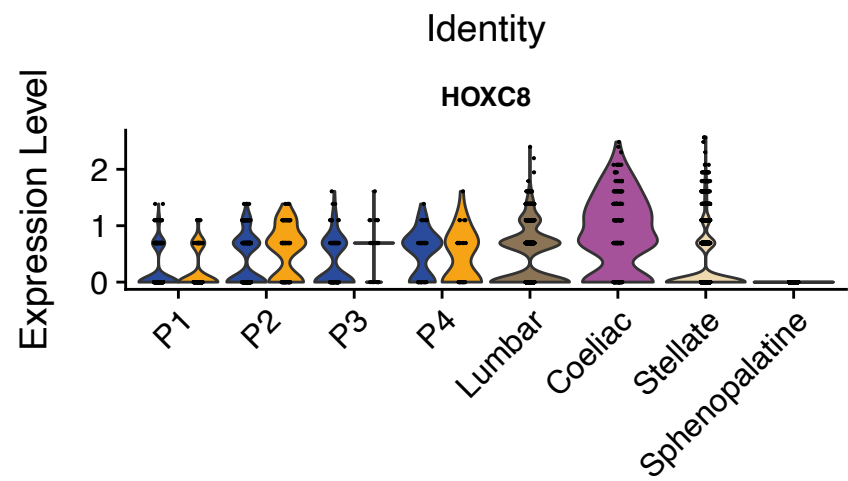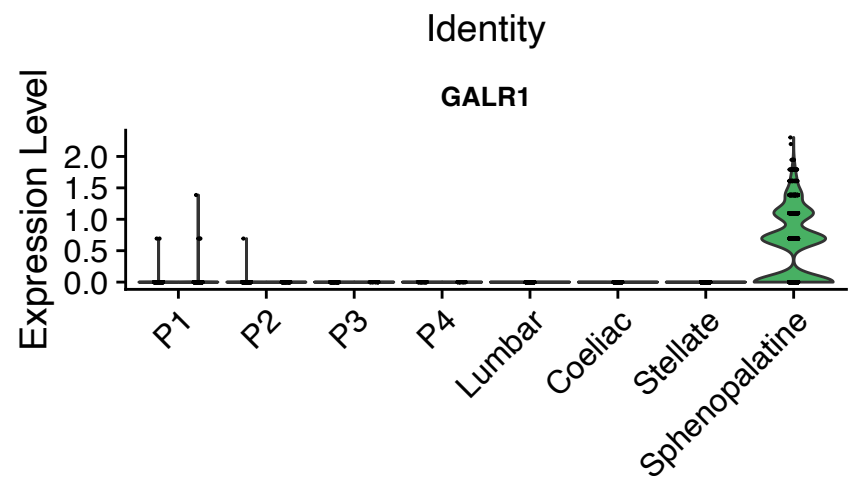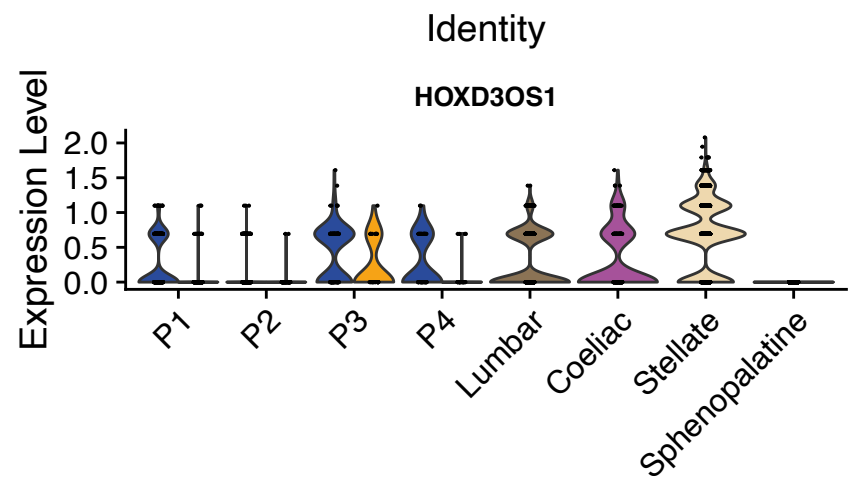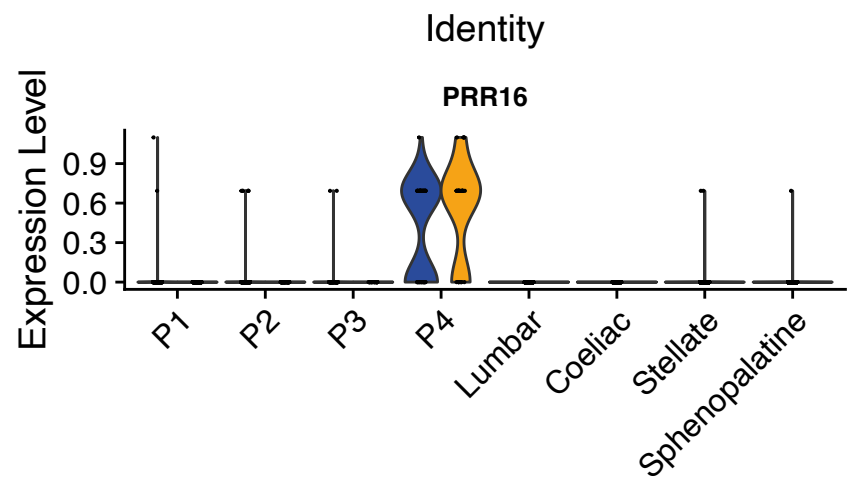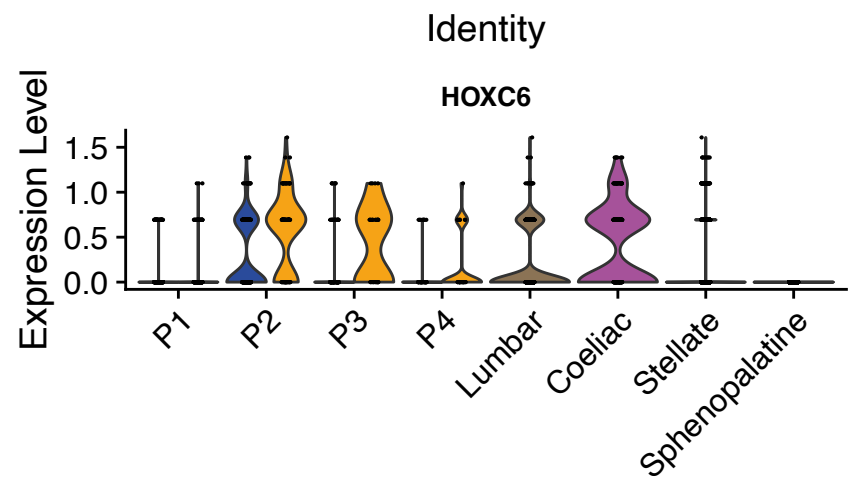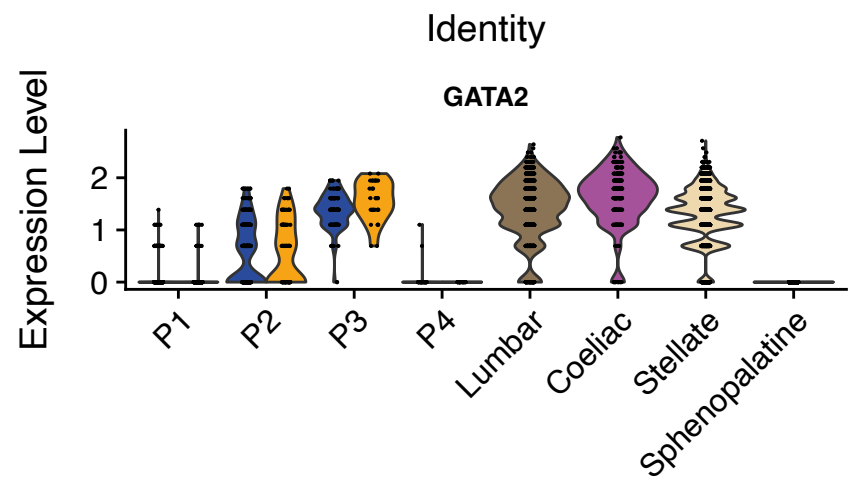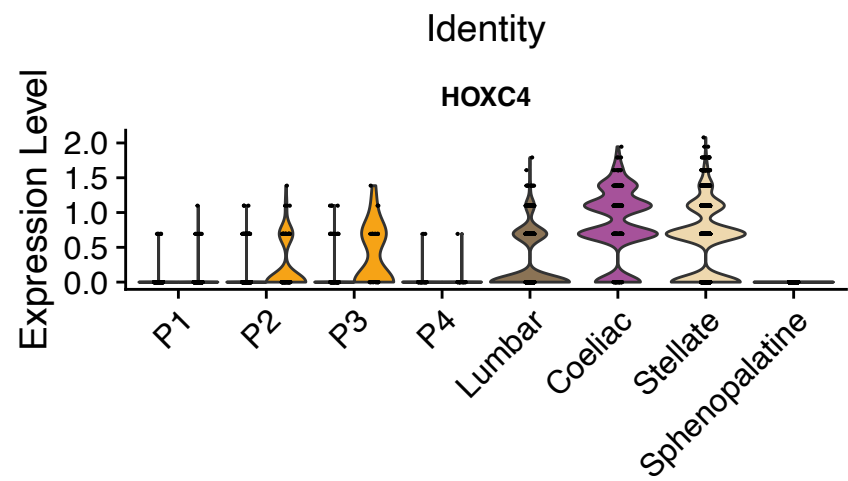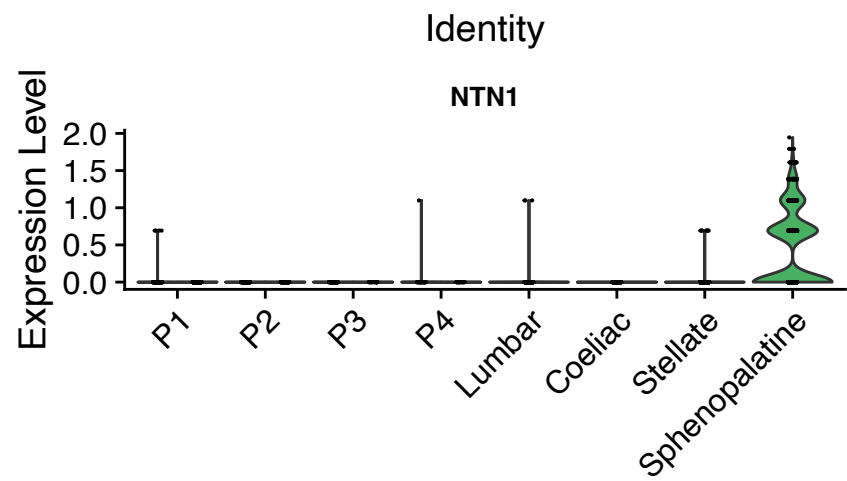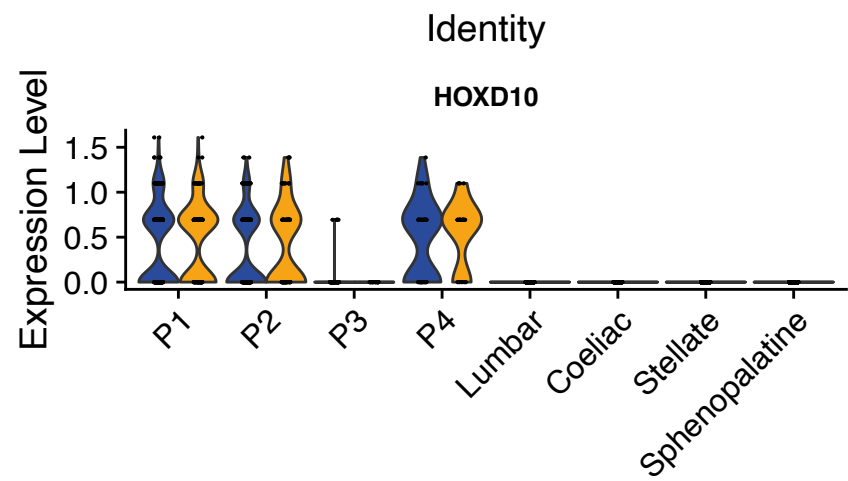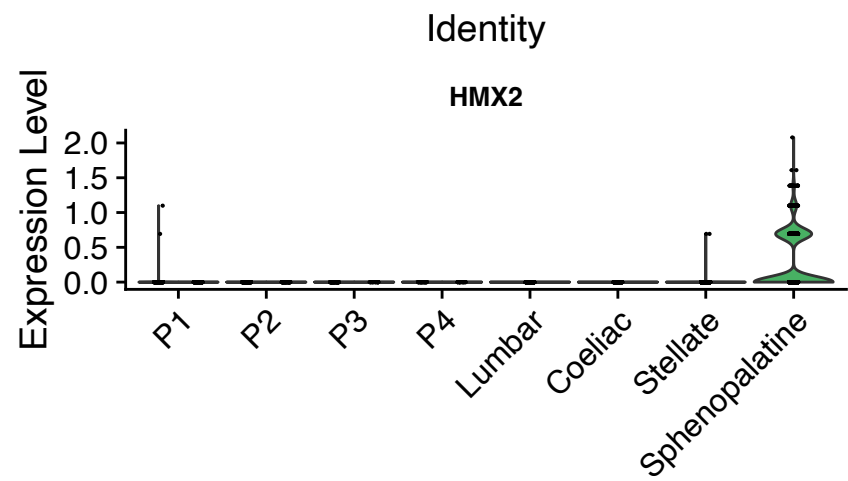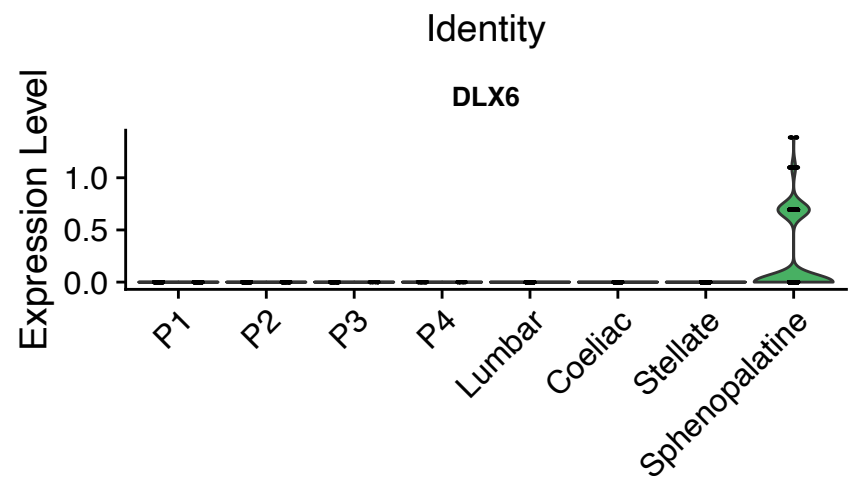

Identity

Identity

Identity

Identity

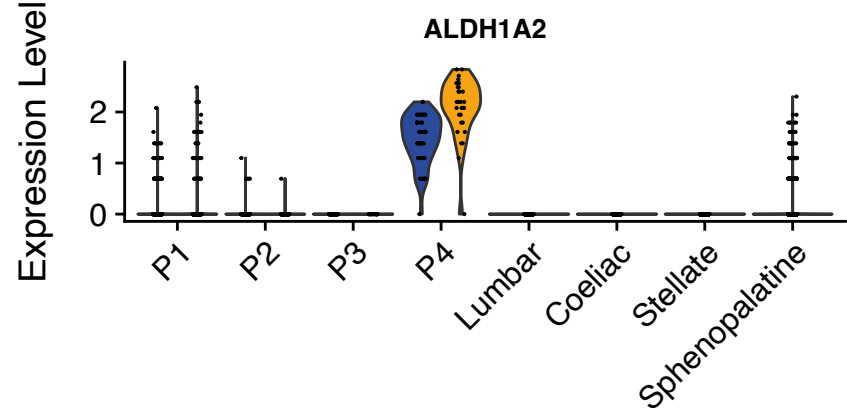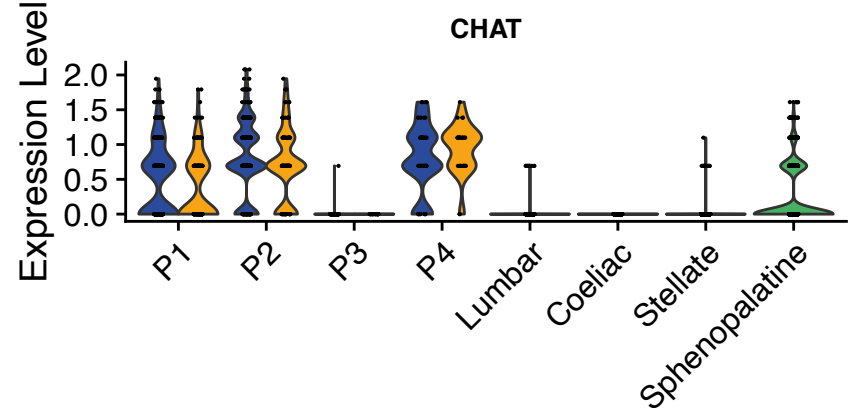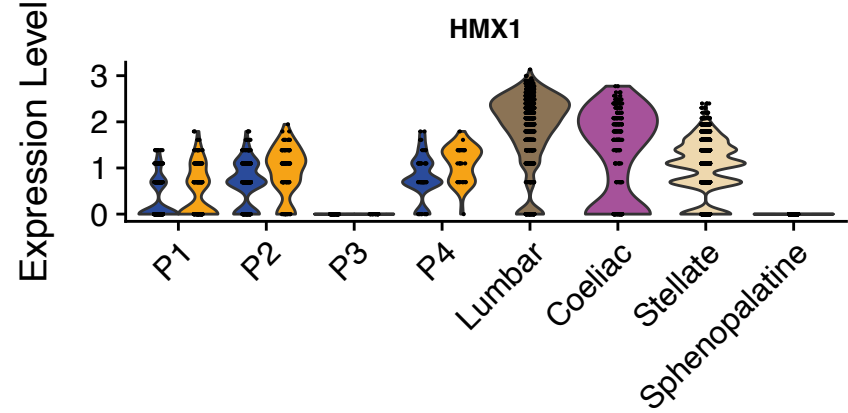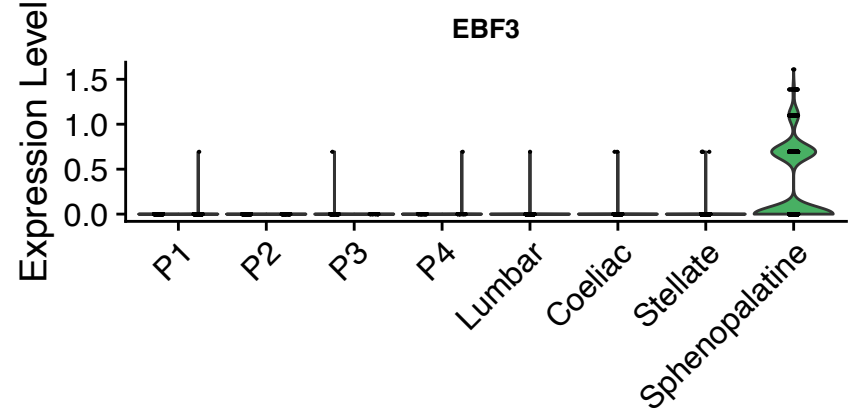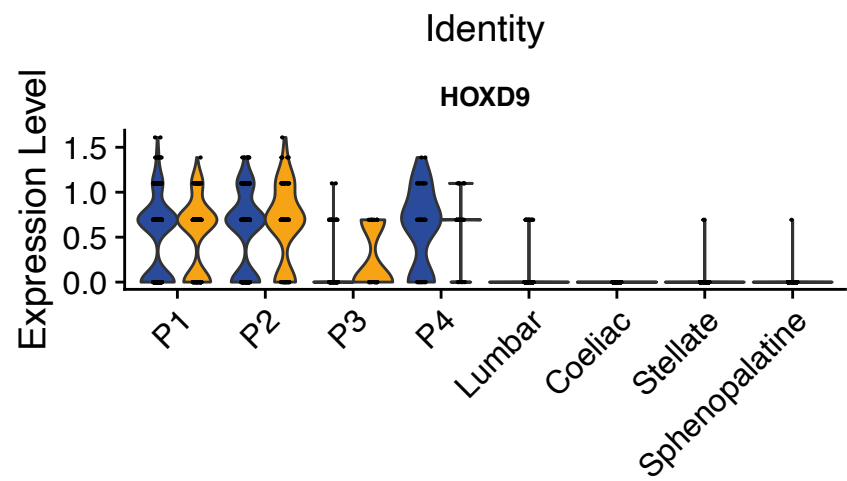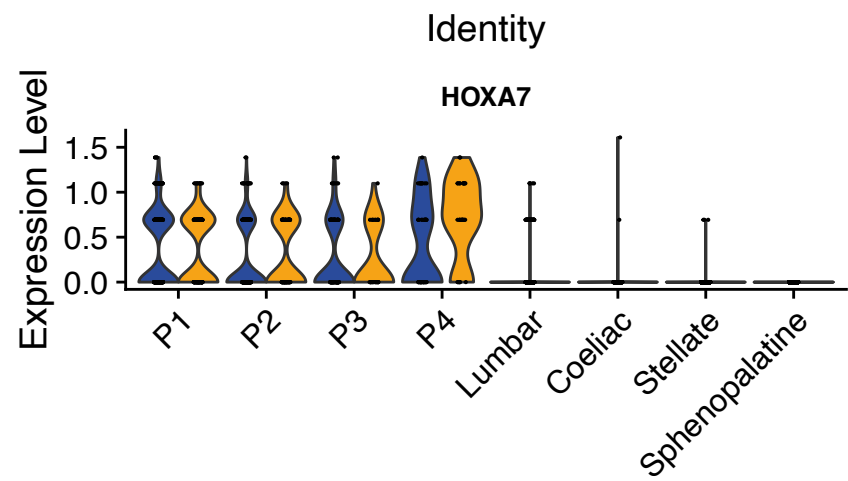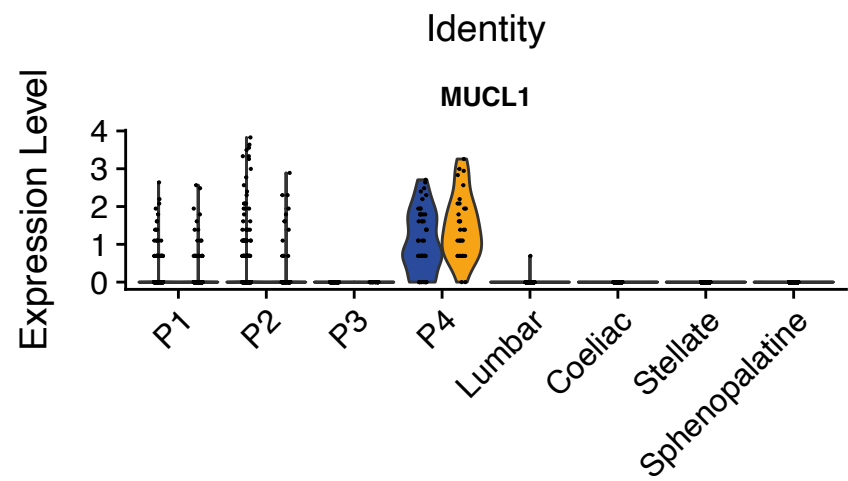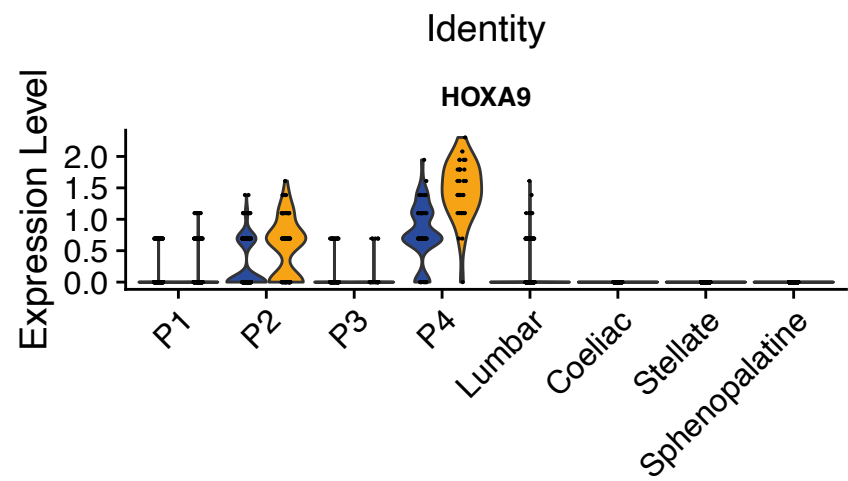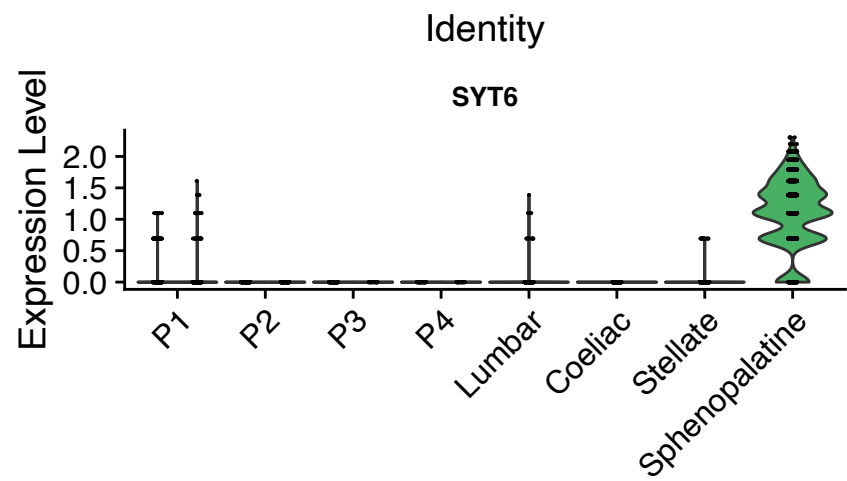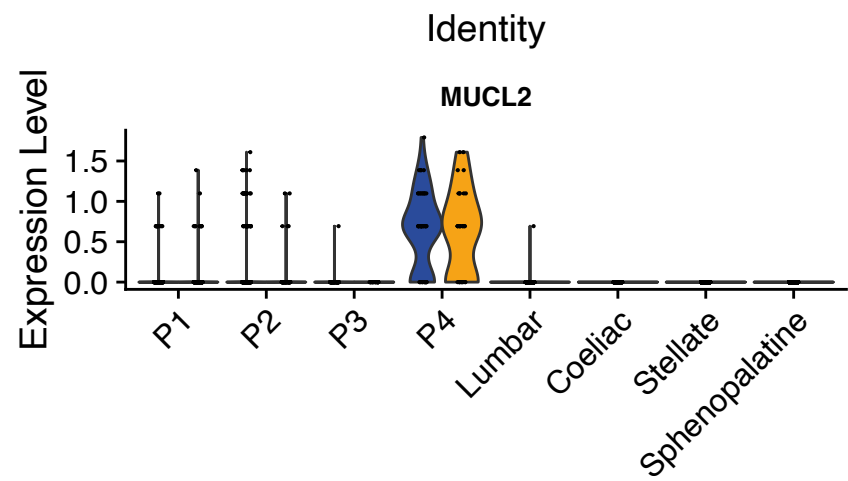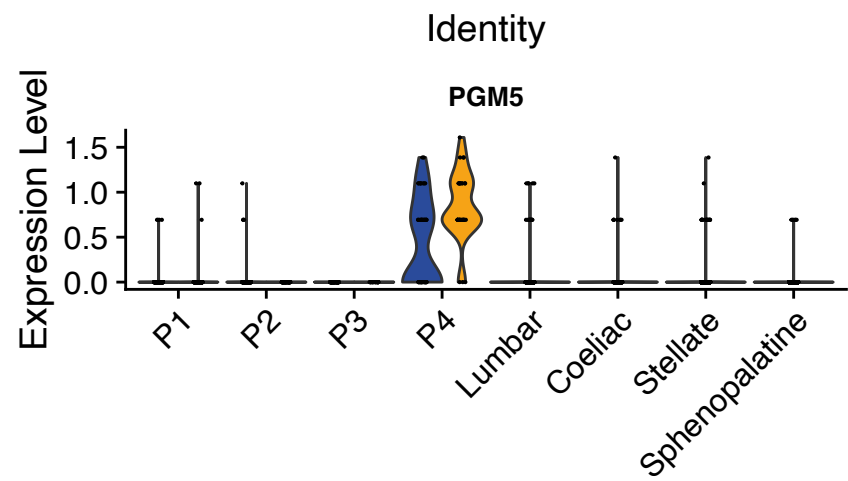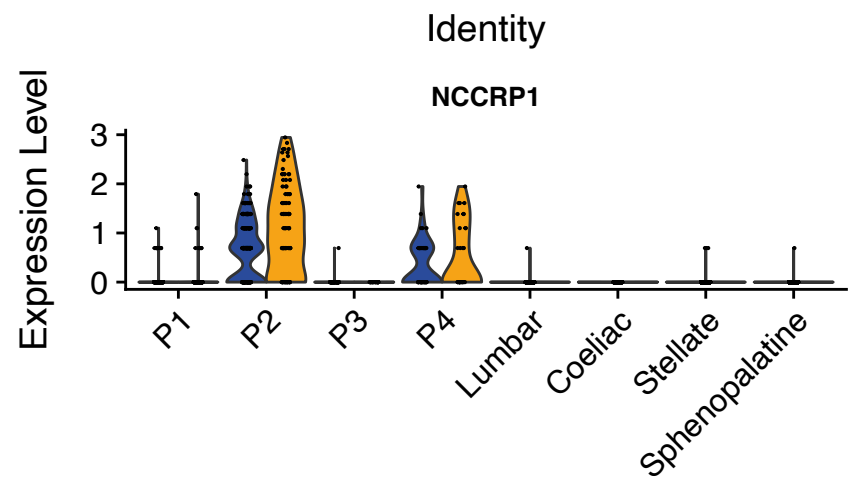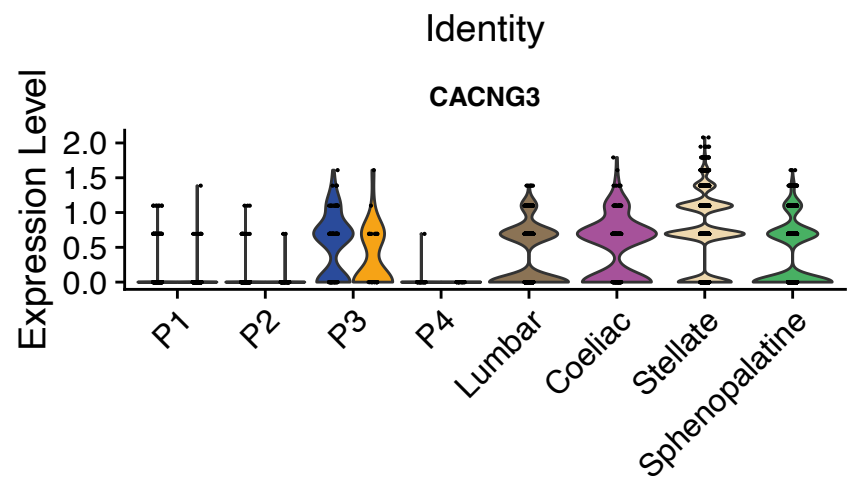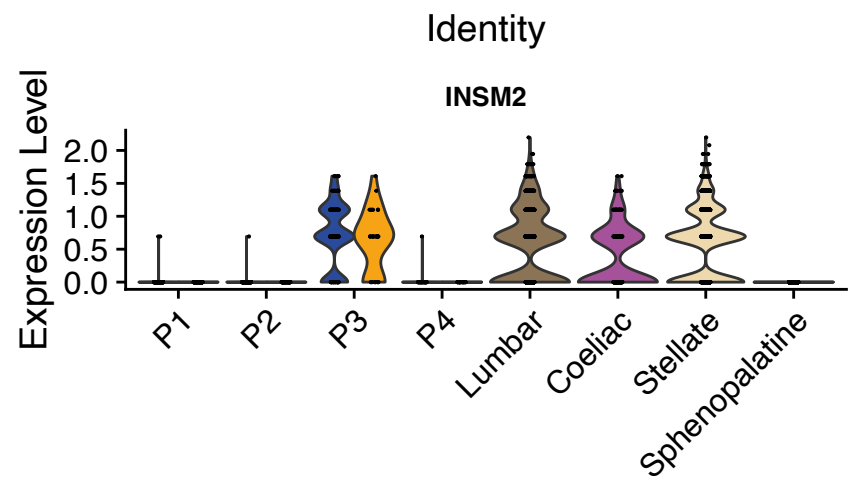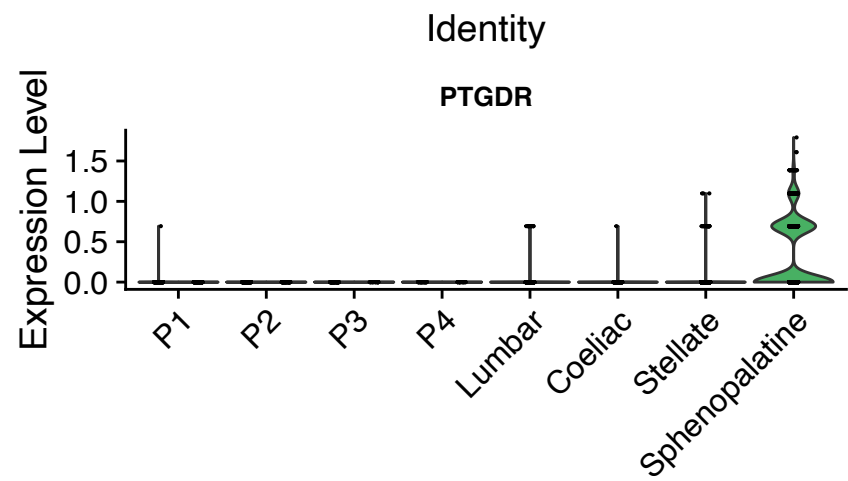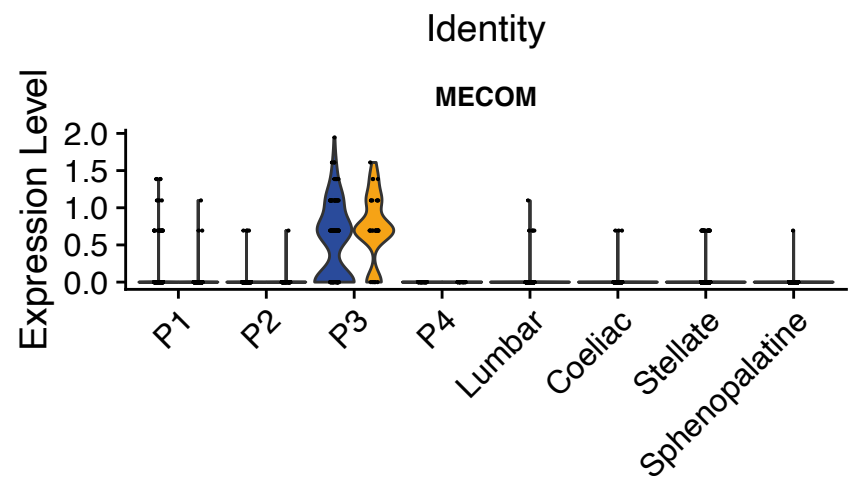

Identity

Identity

Identity

Identity

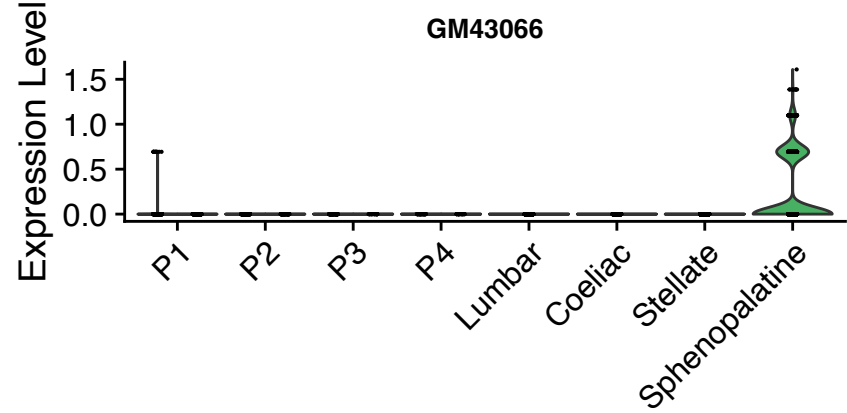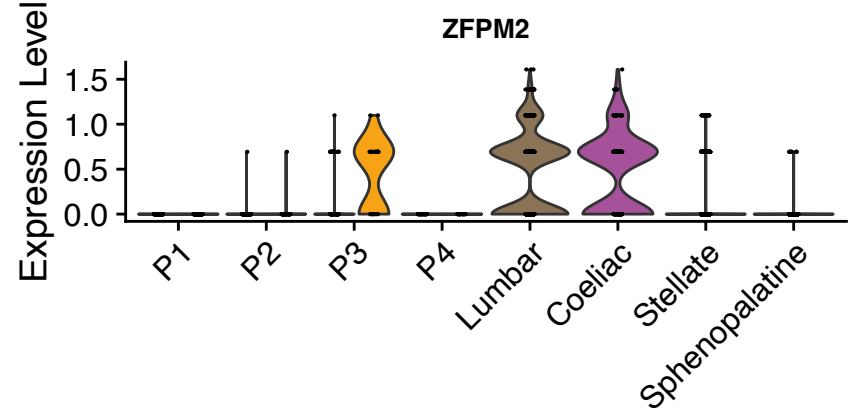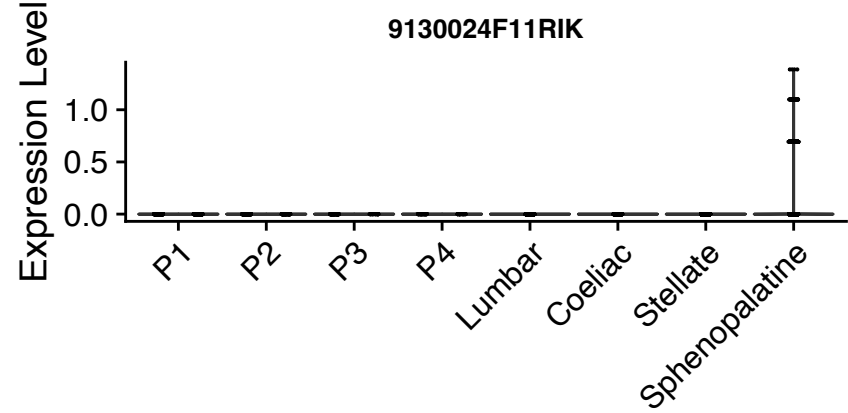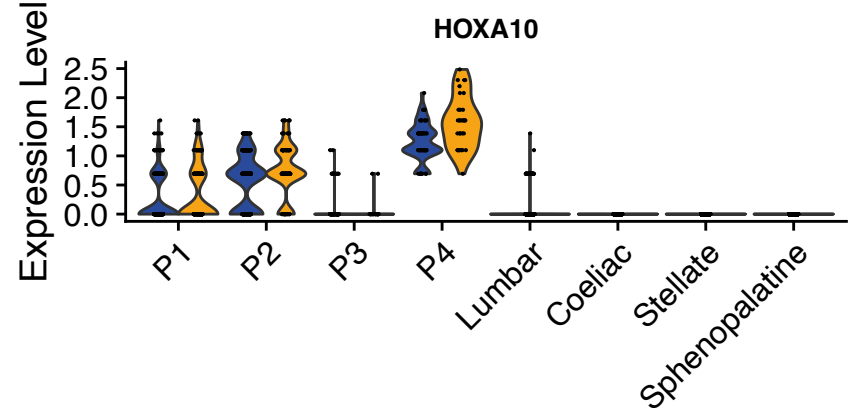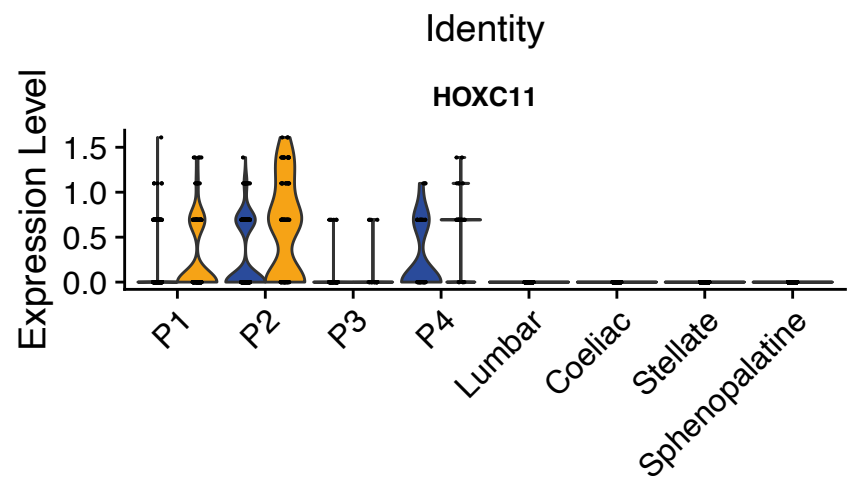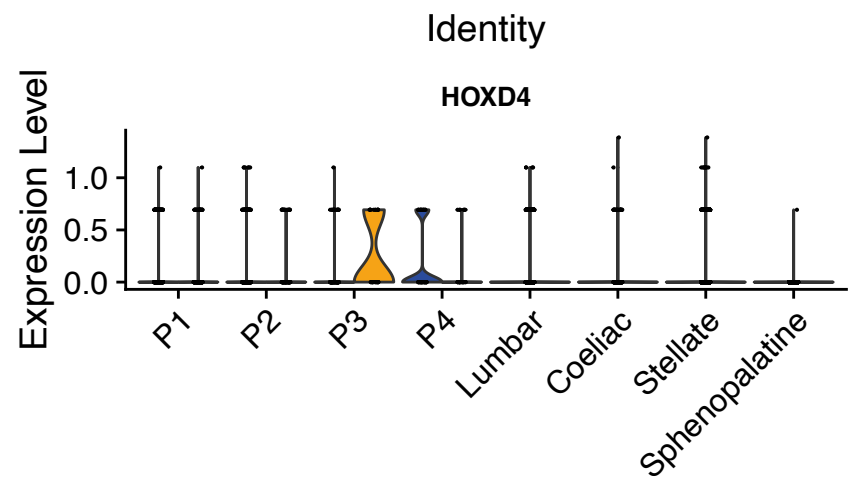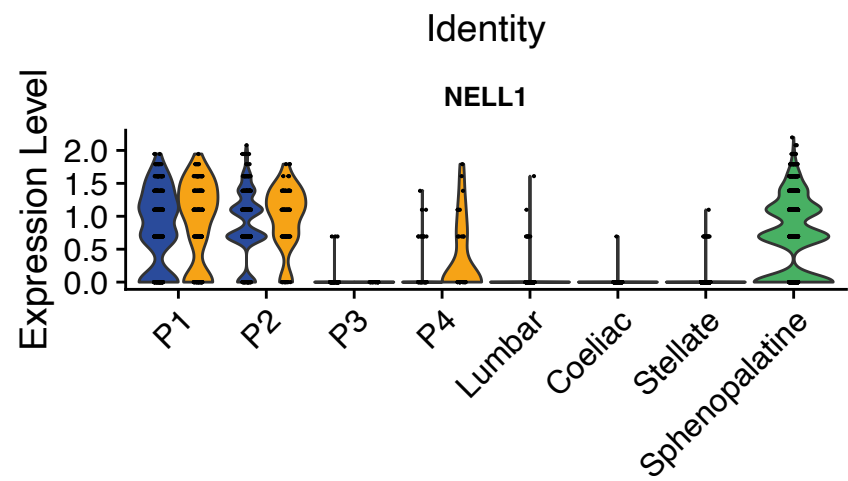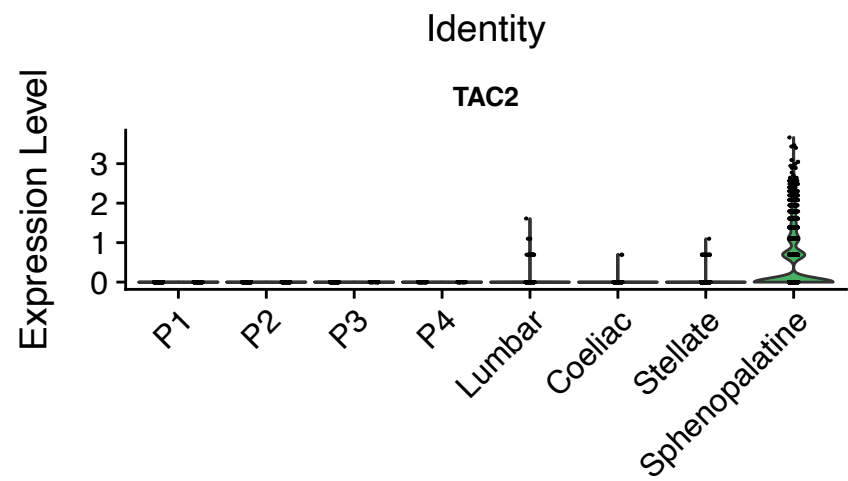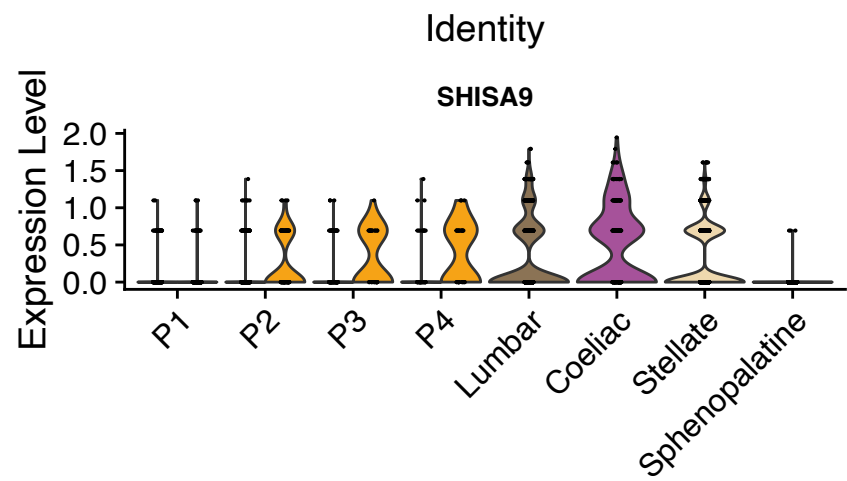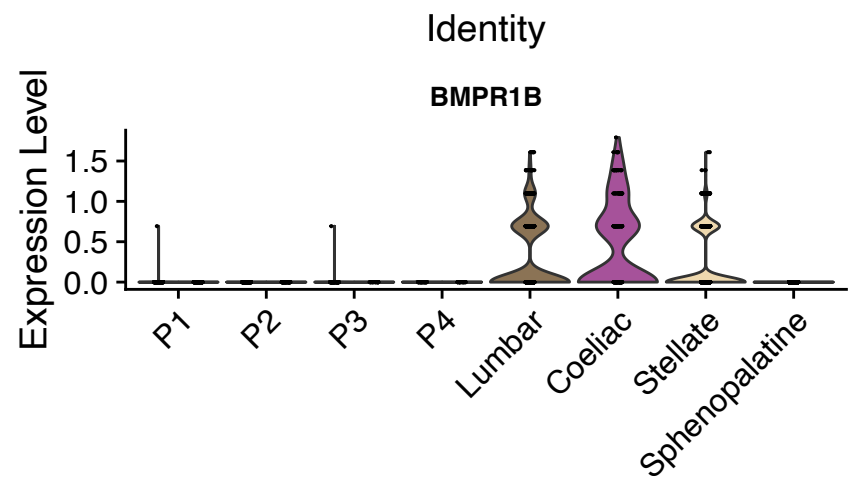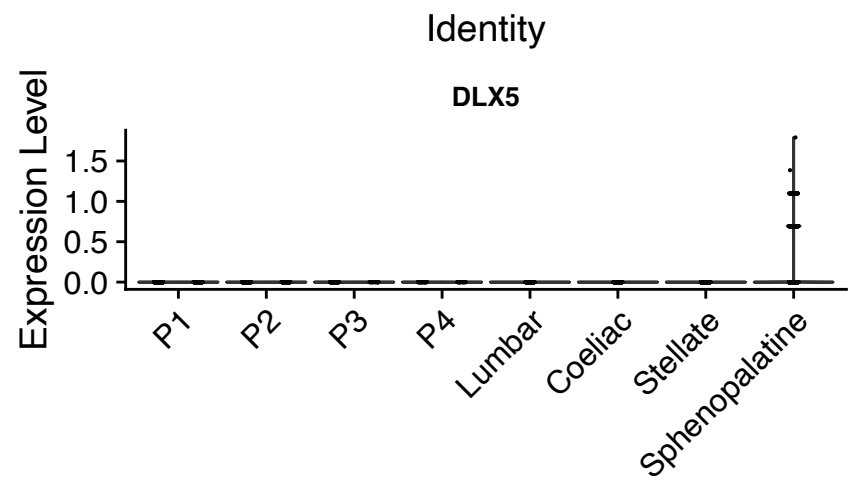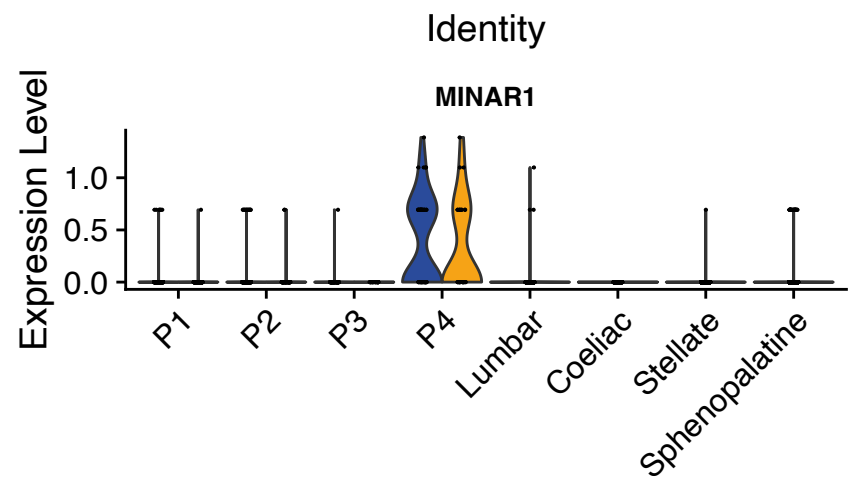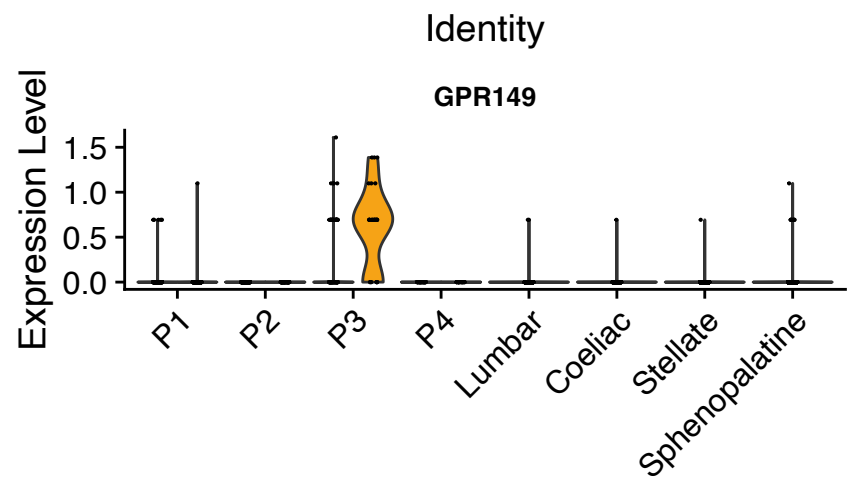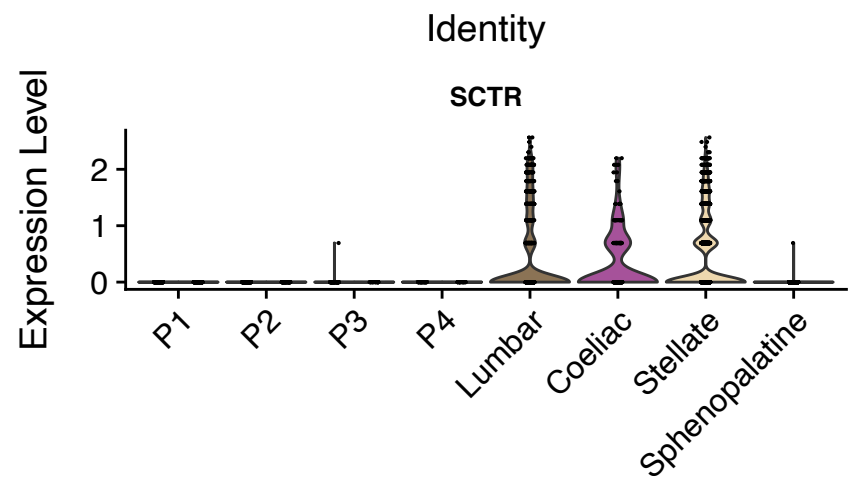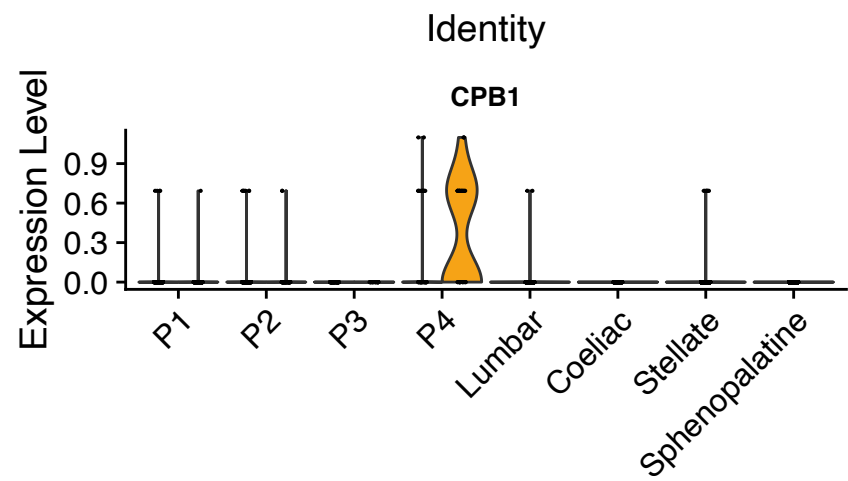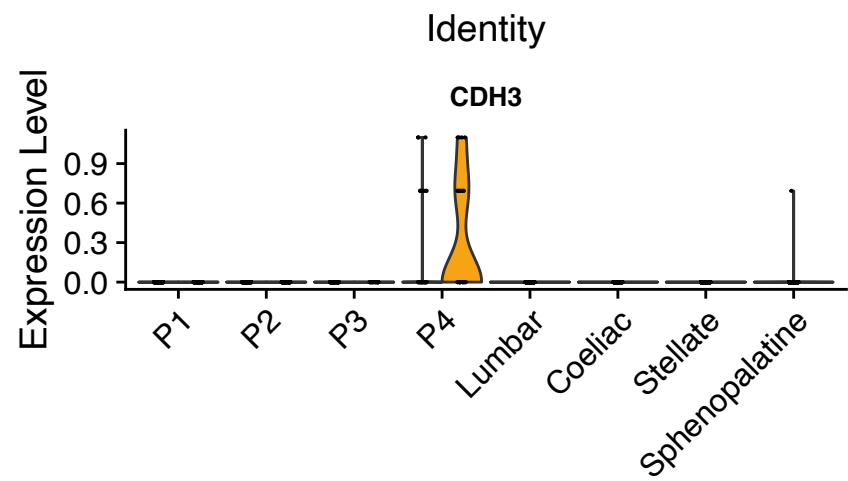

Identity

Identity

Identity

Identity

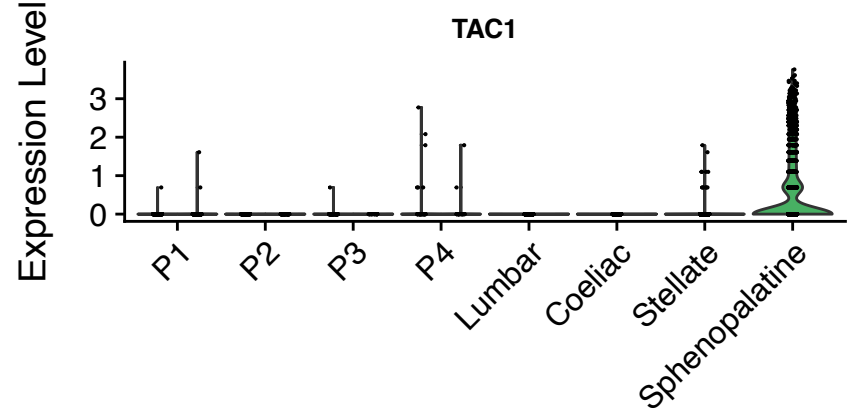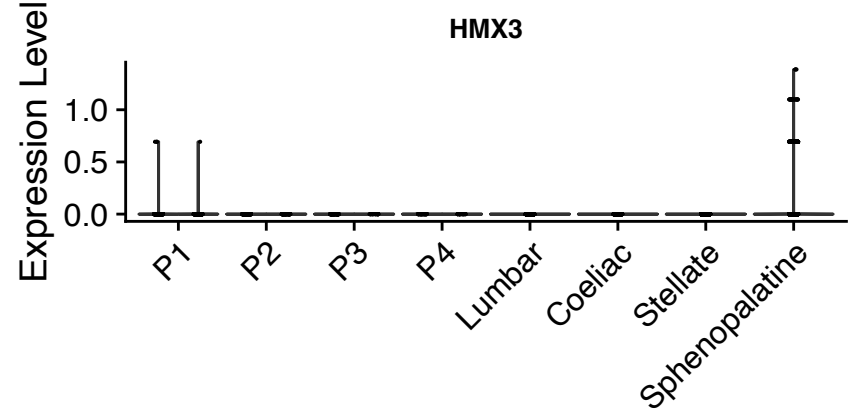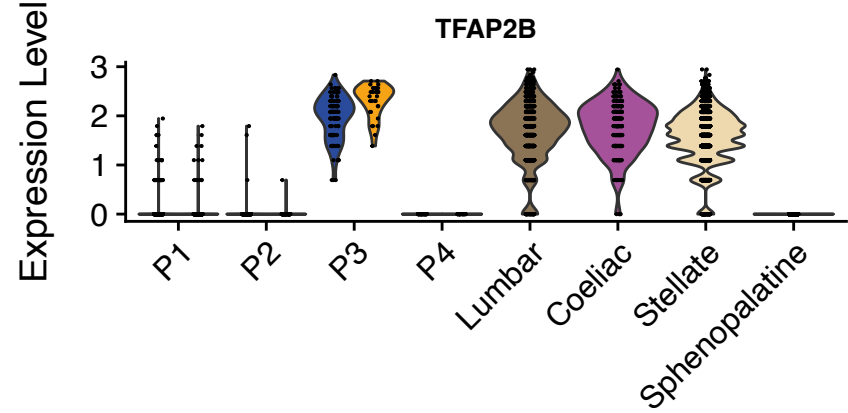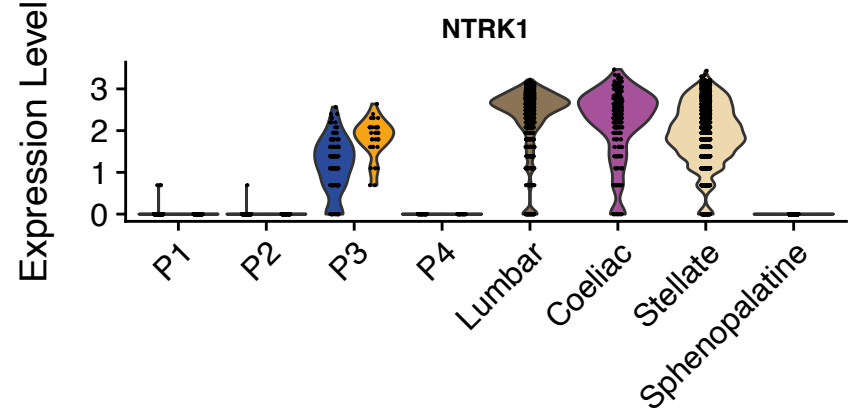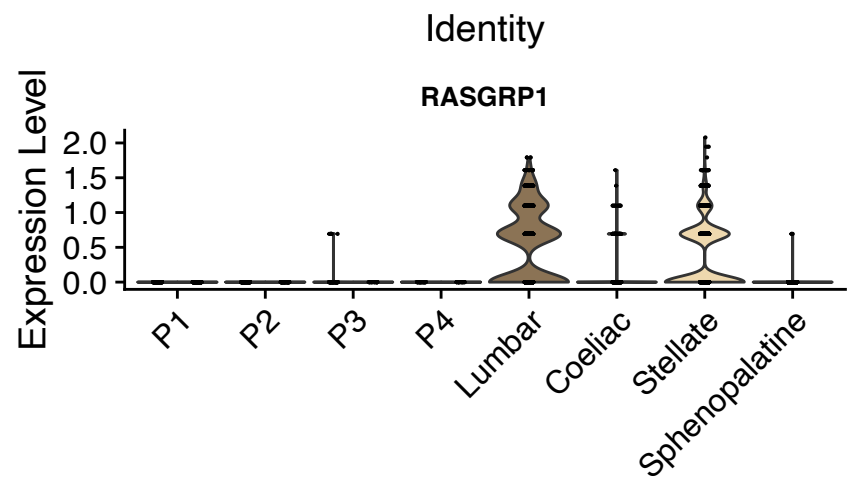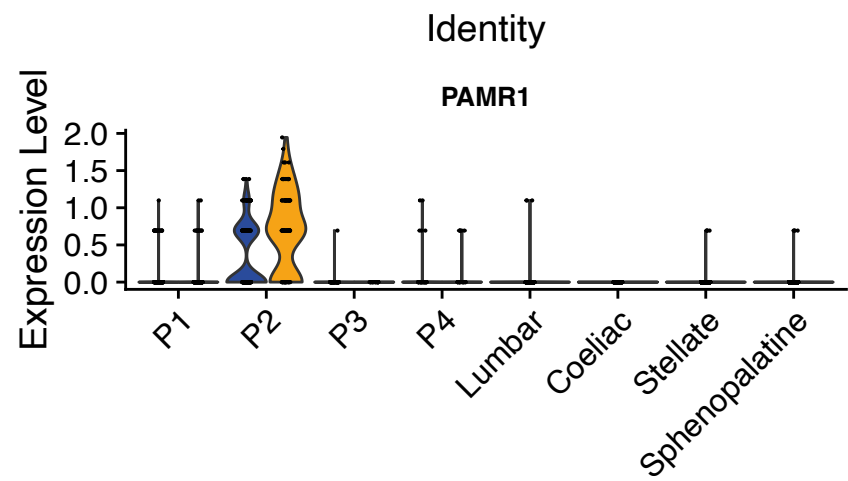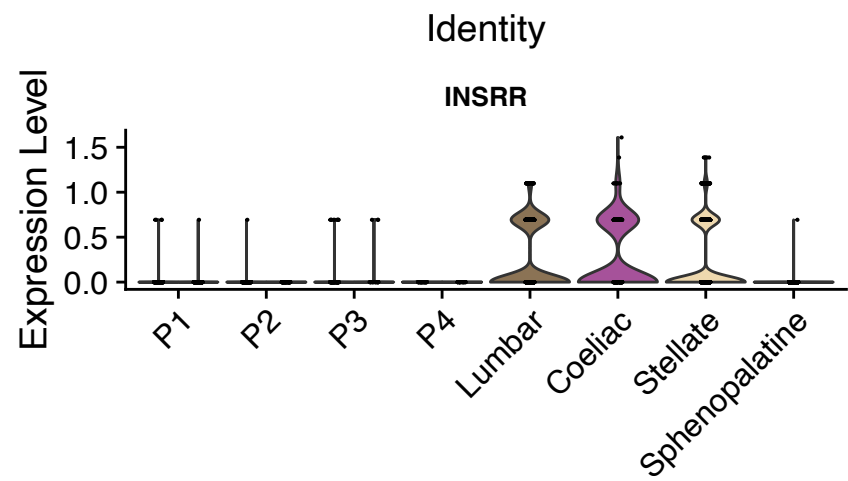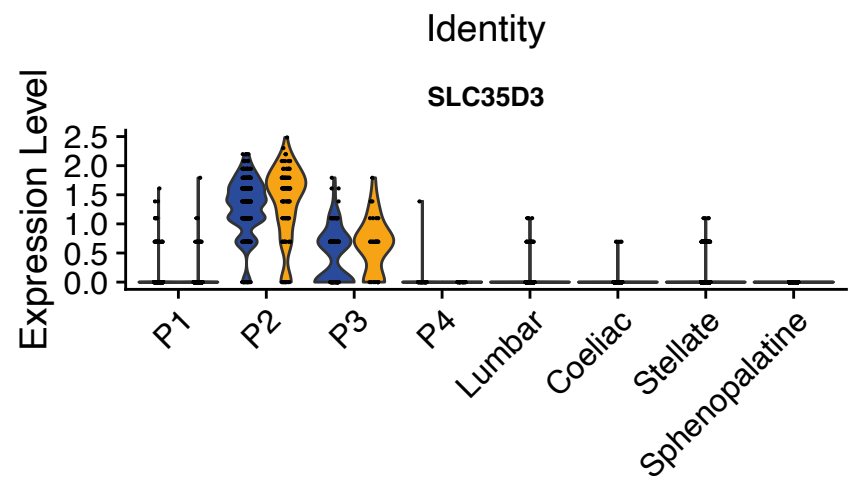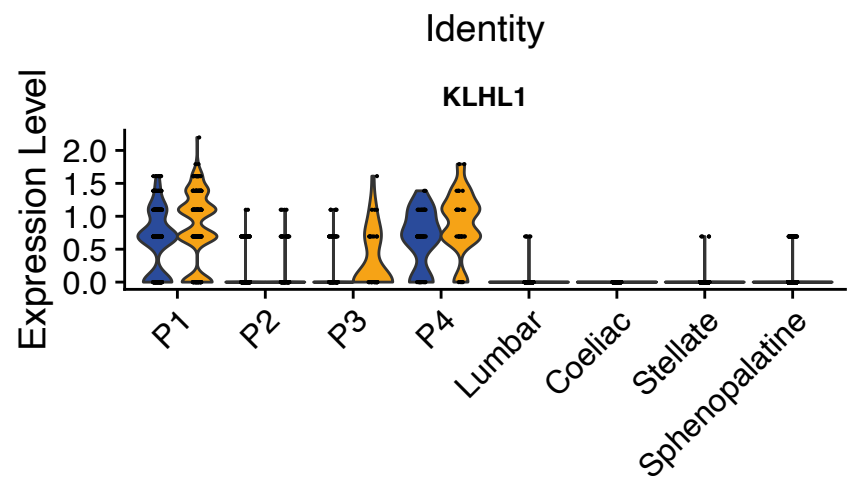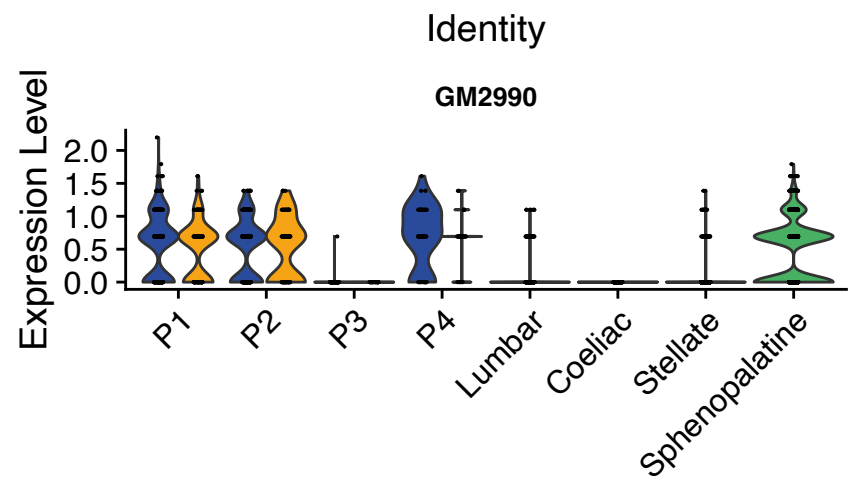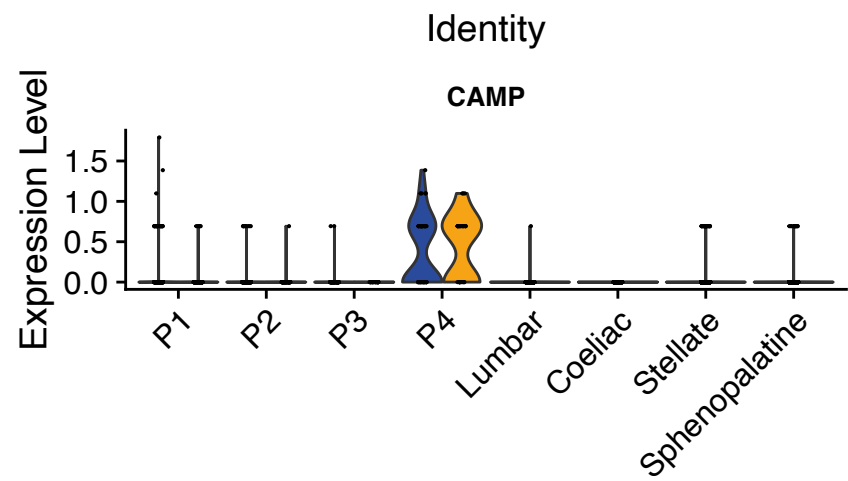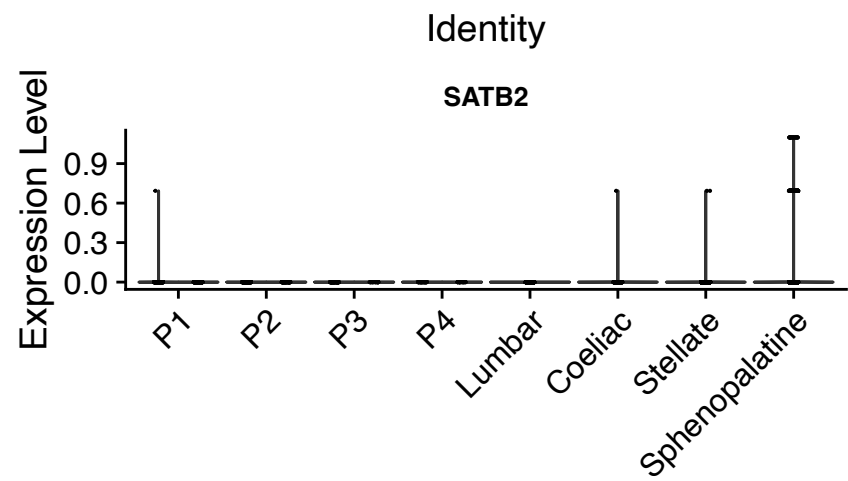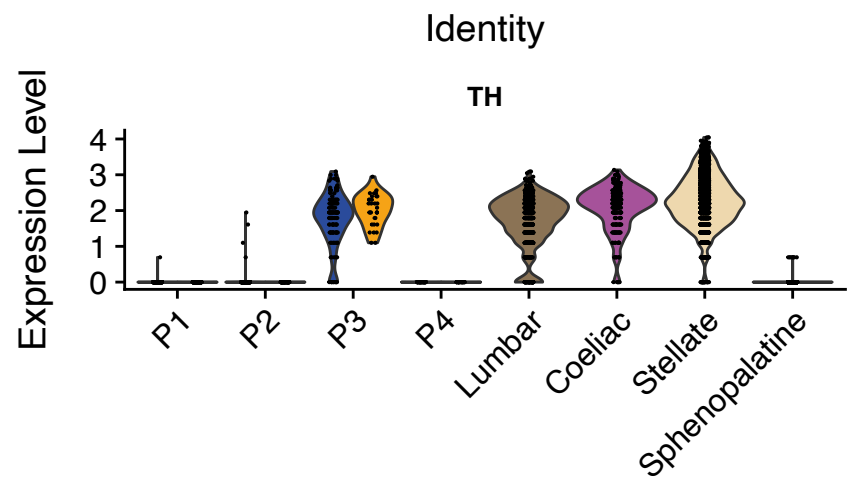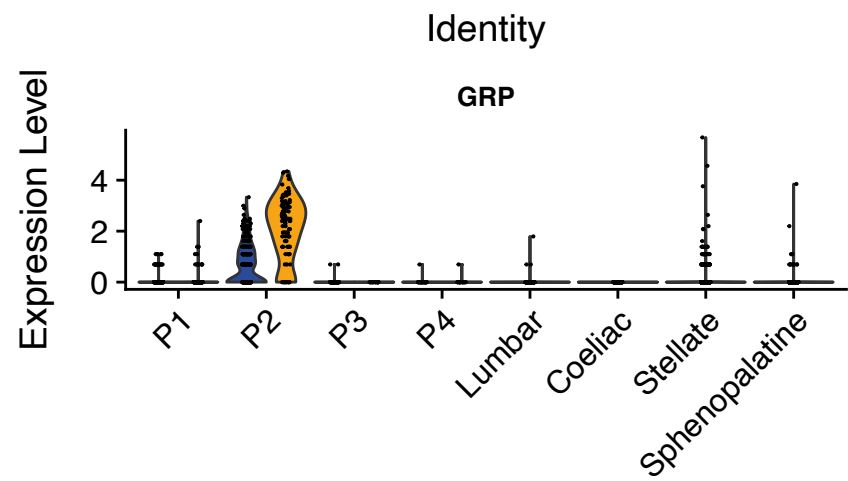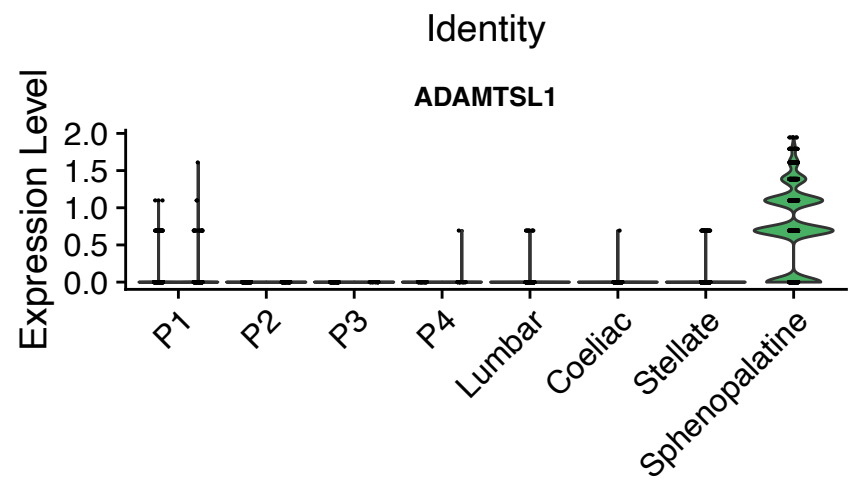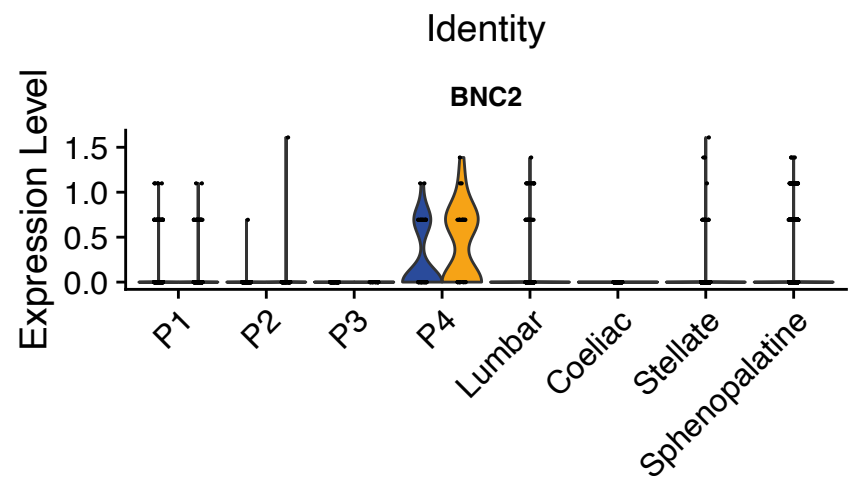

Identity

Identity

Identity

Identity

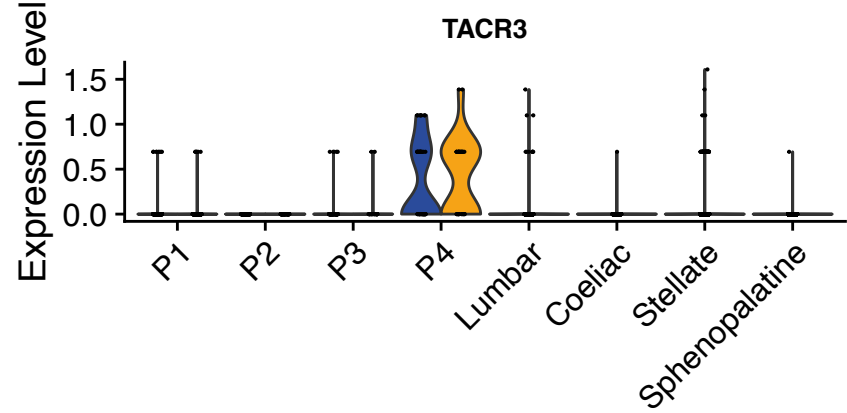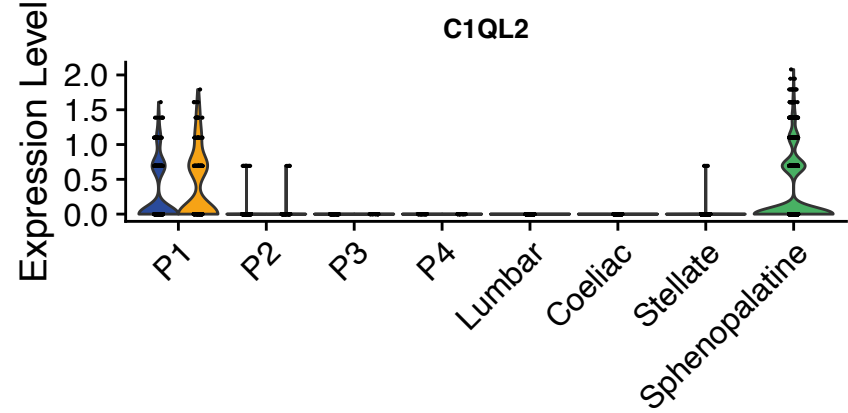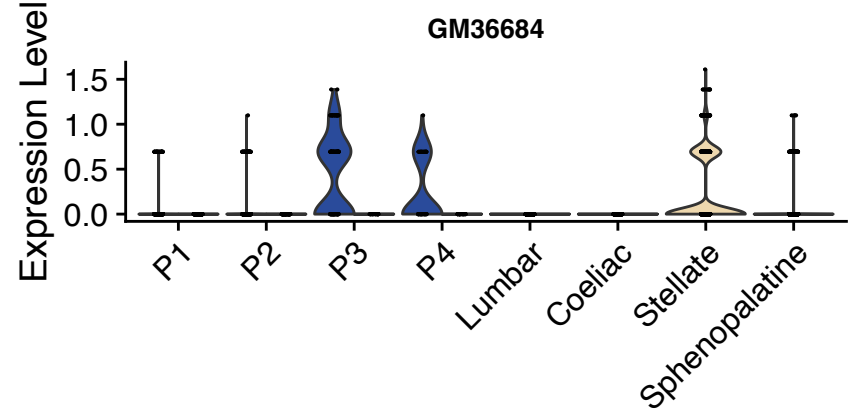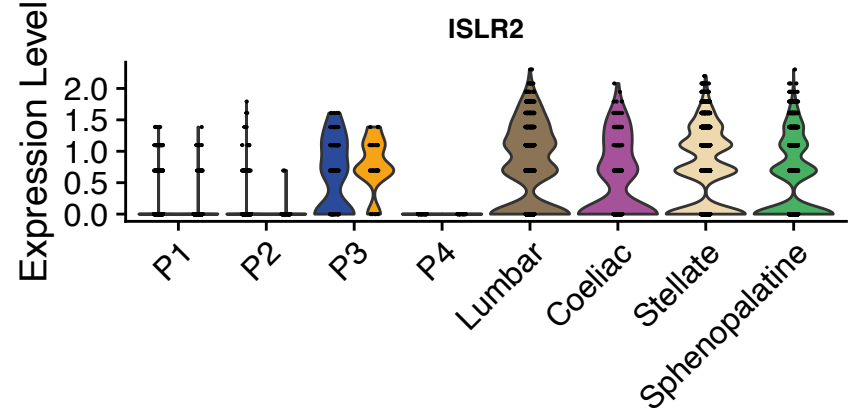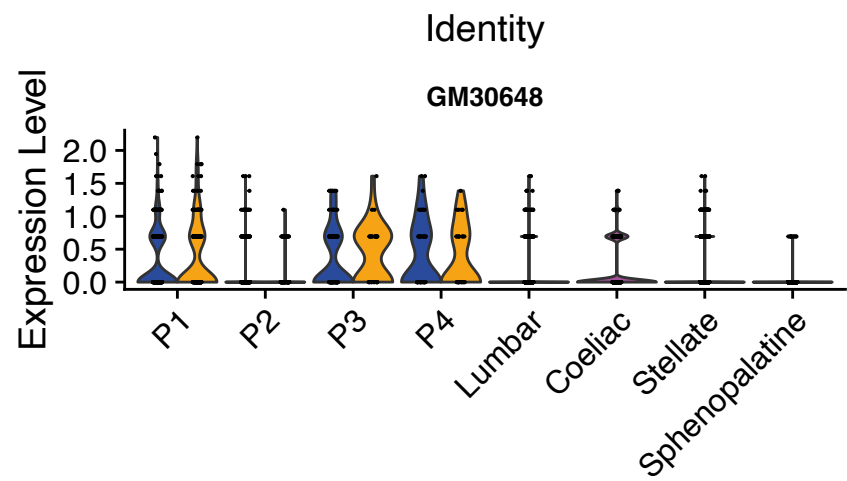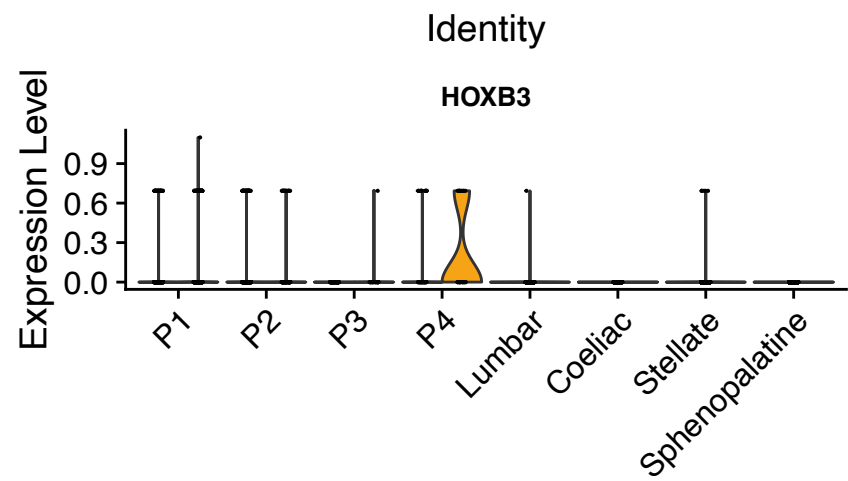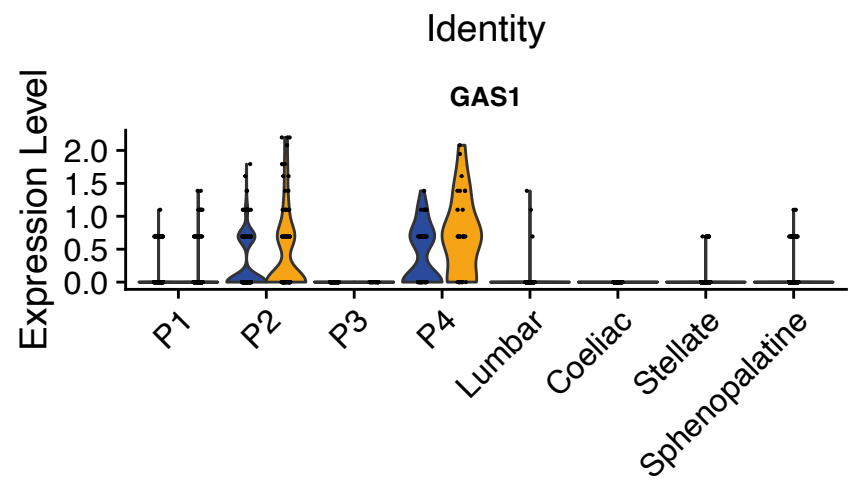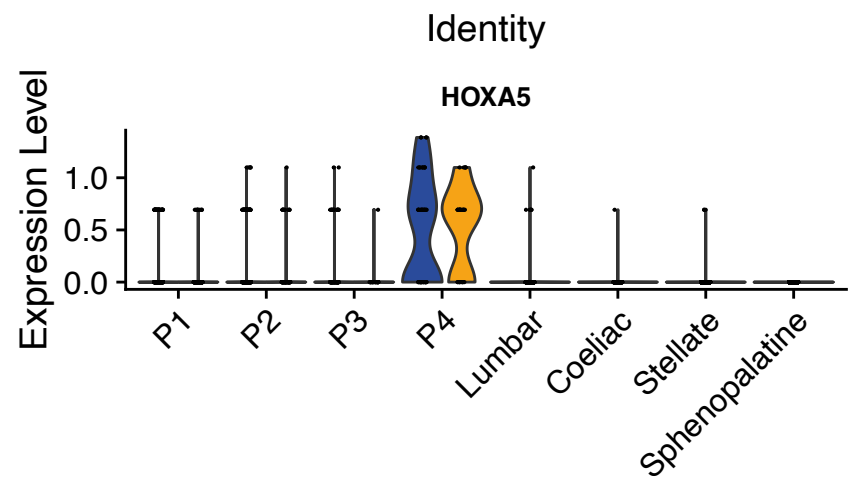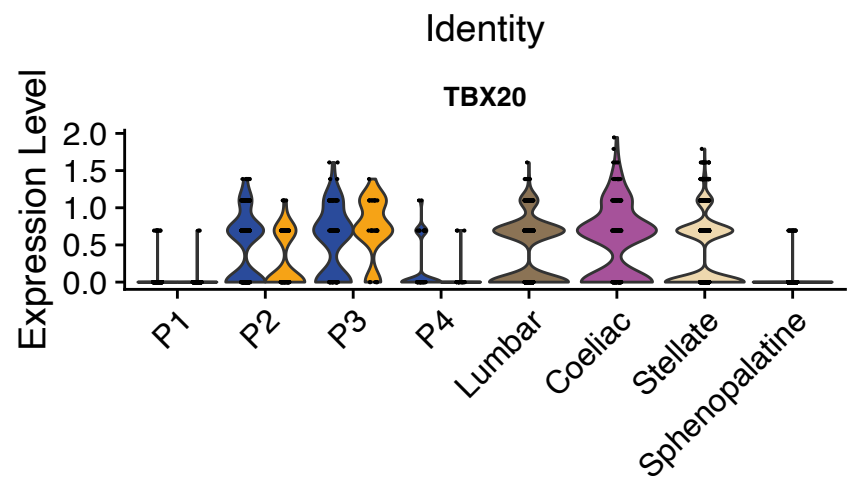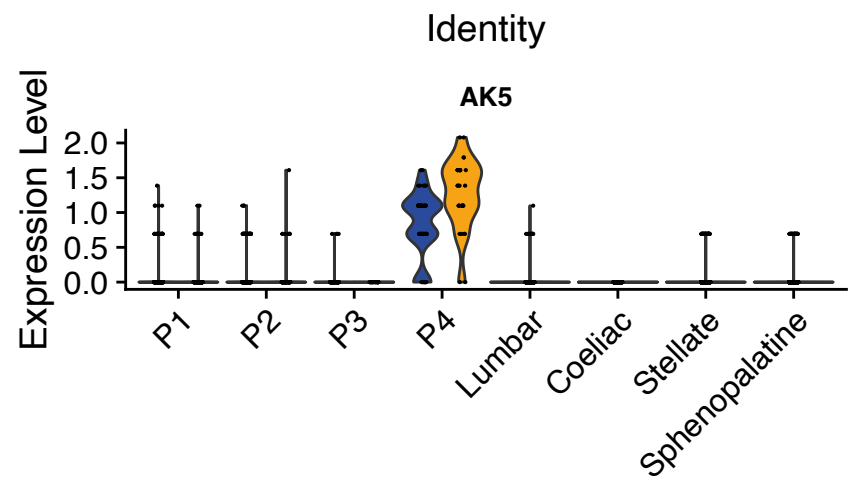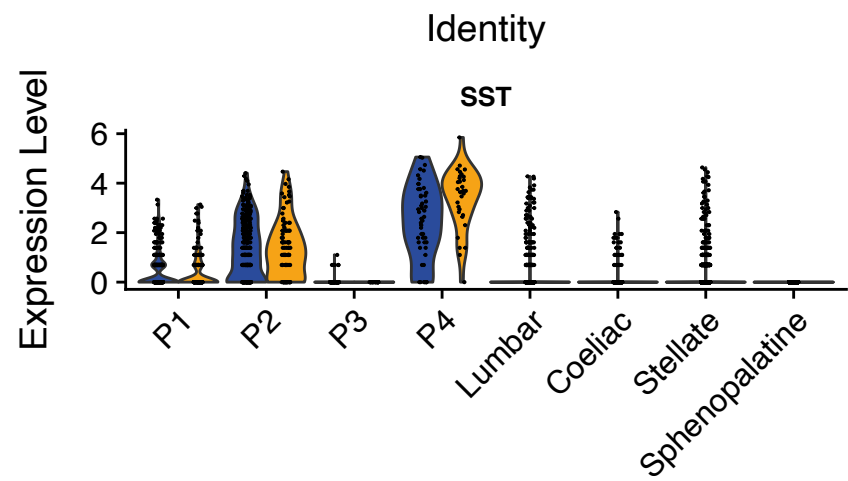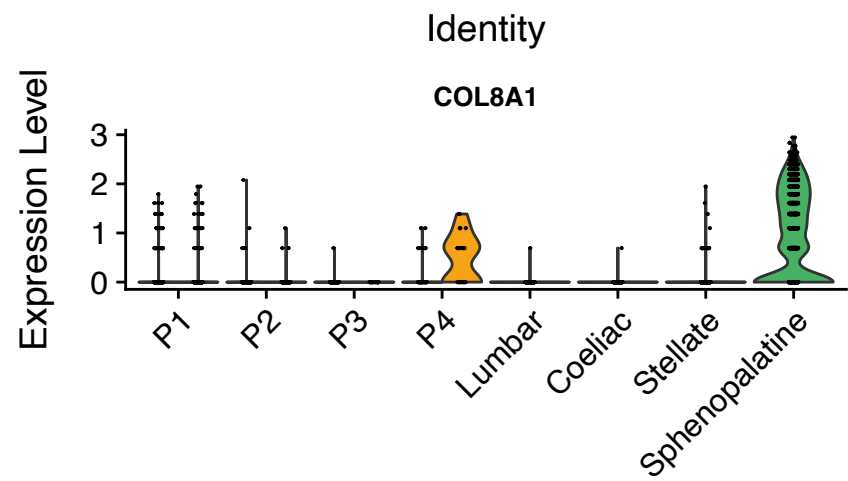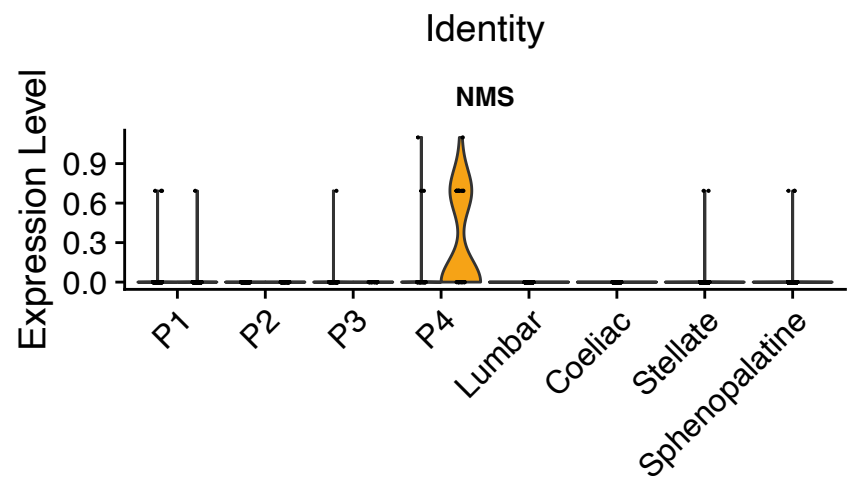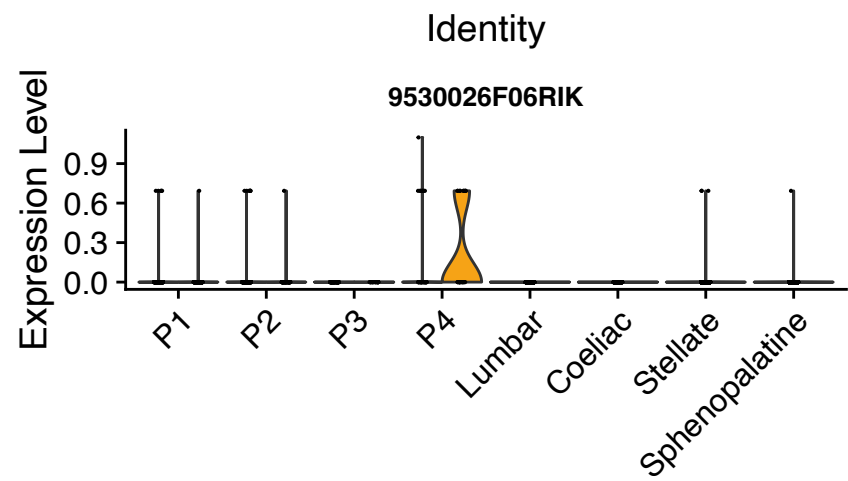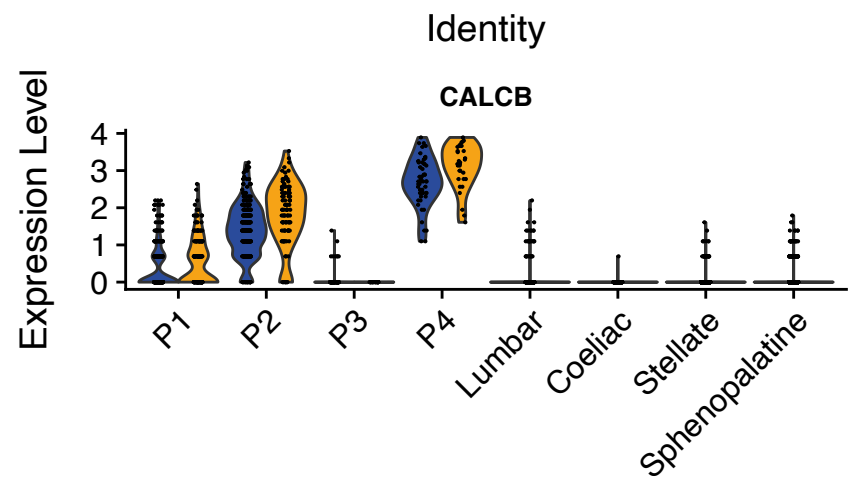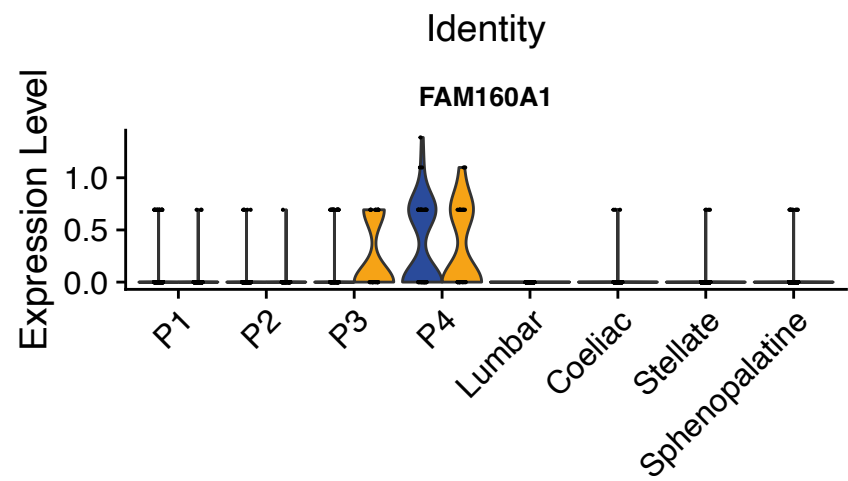

Identity

Identity

Identity

Identity

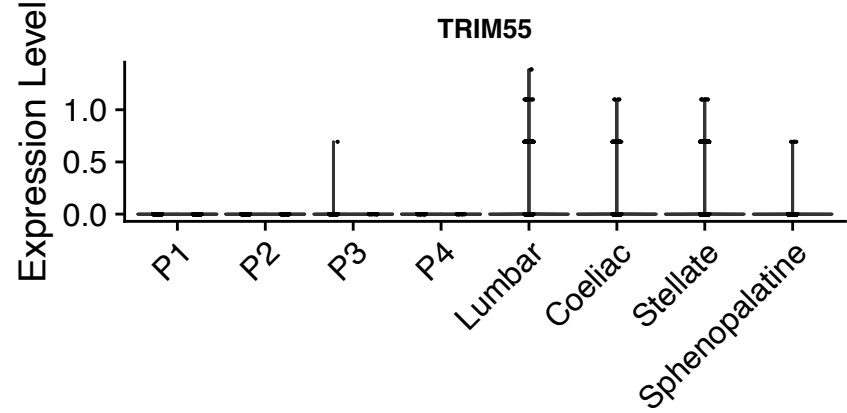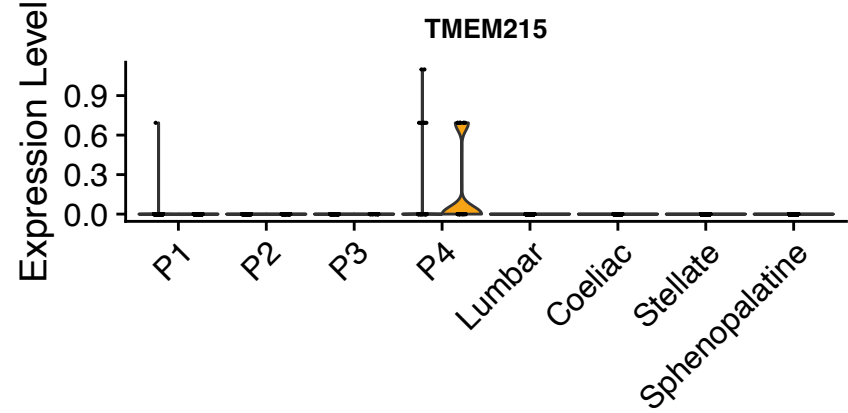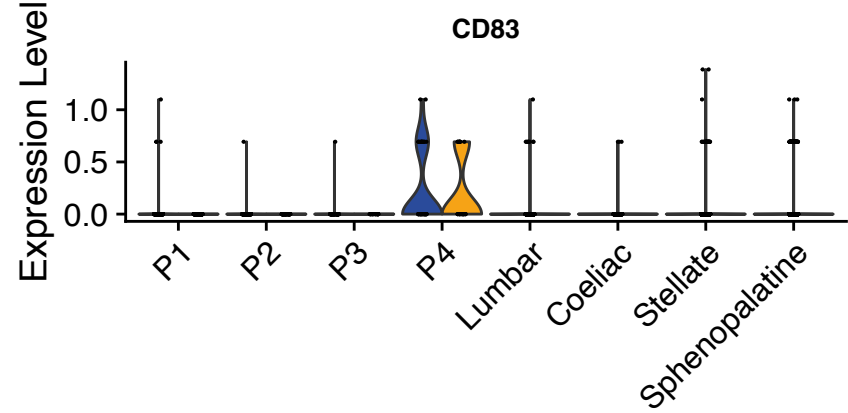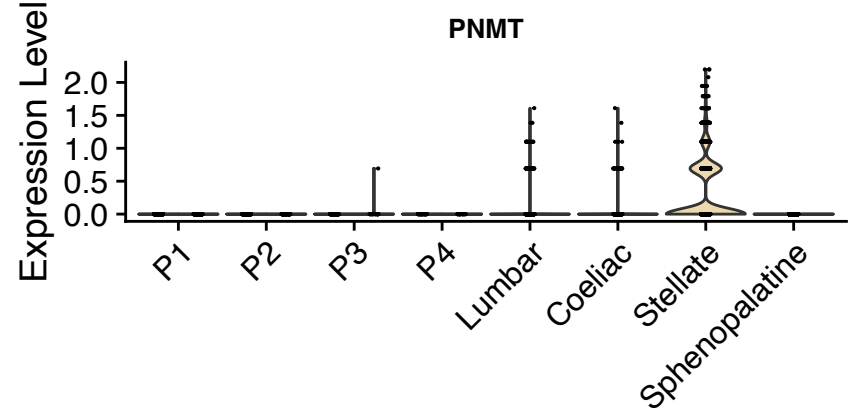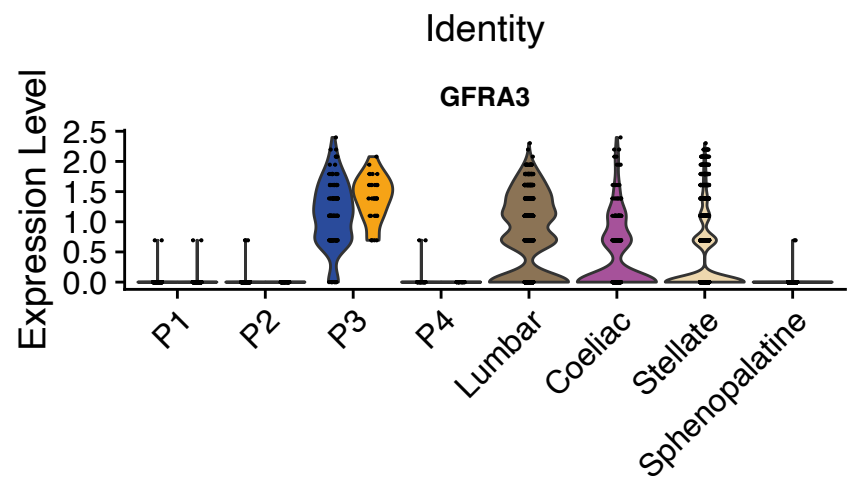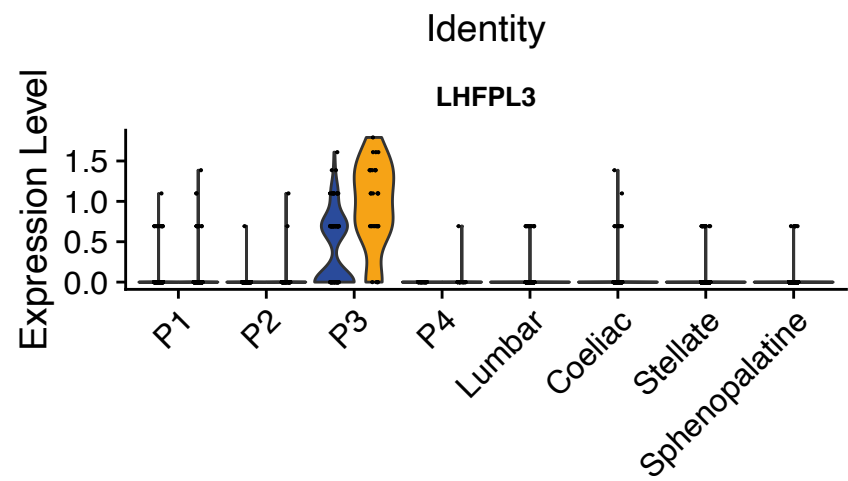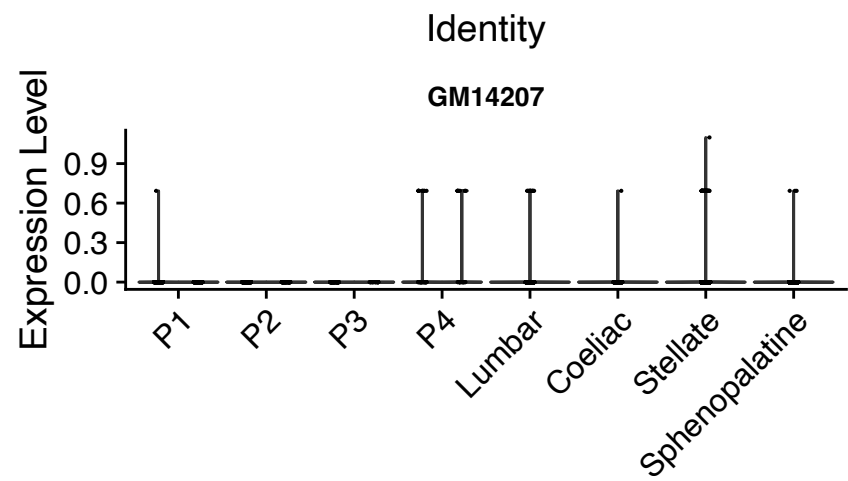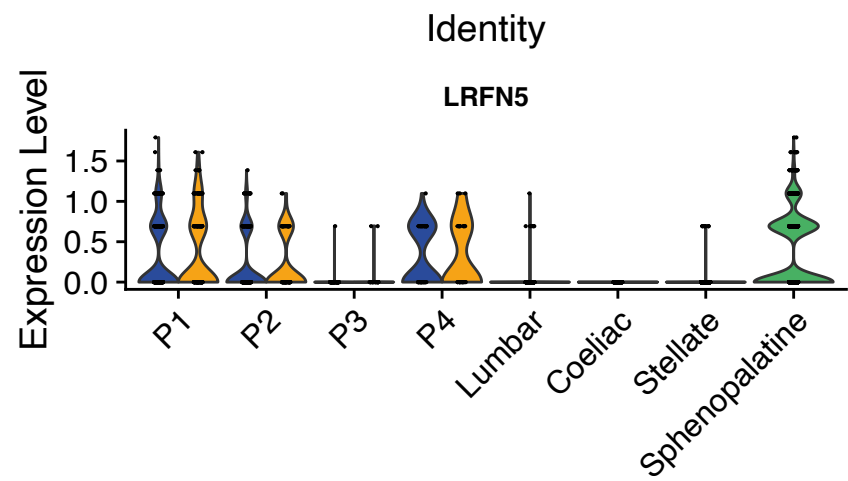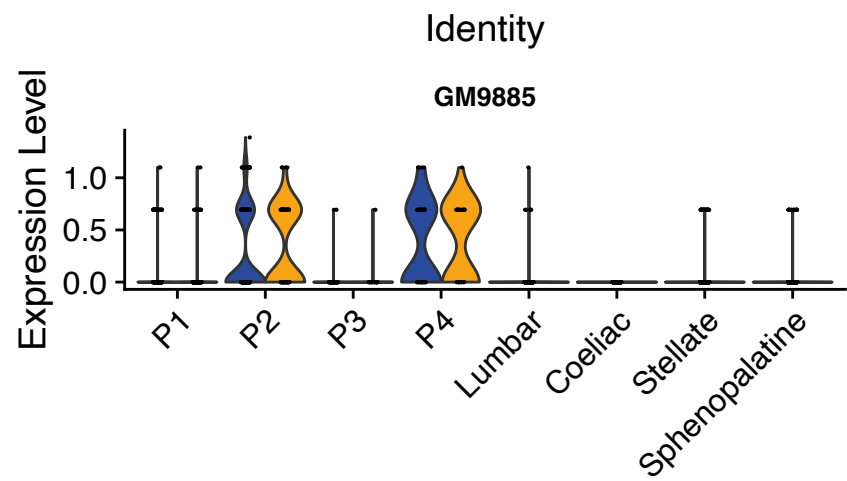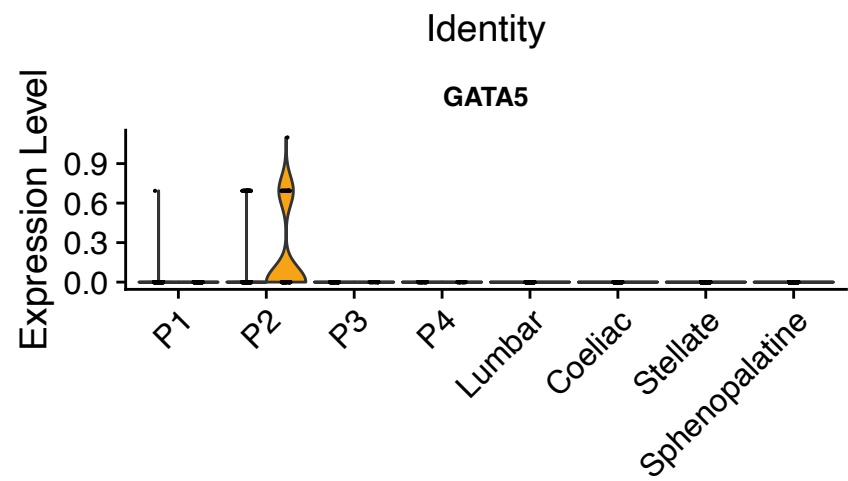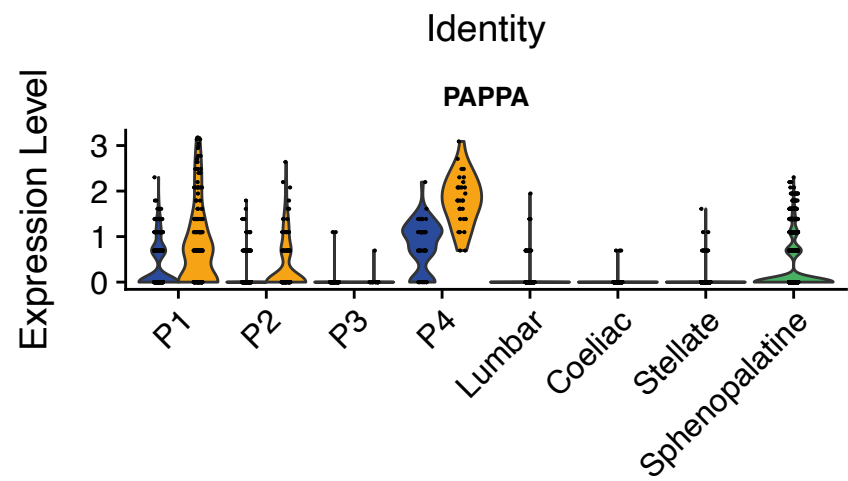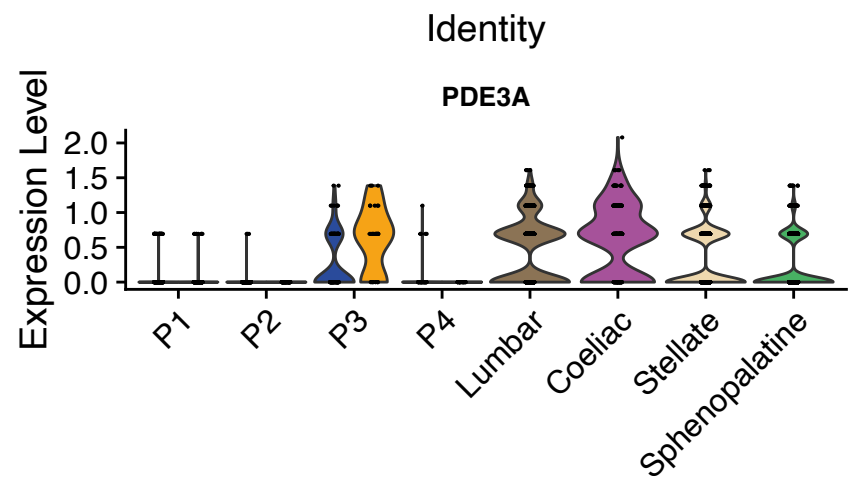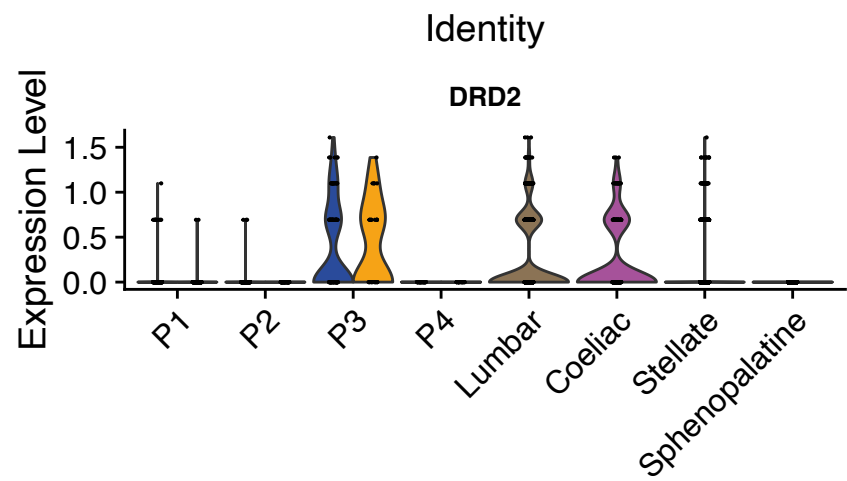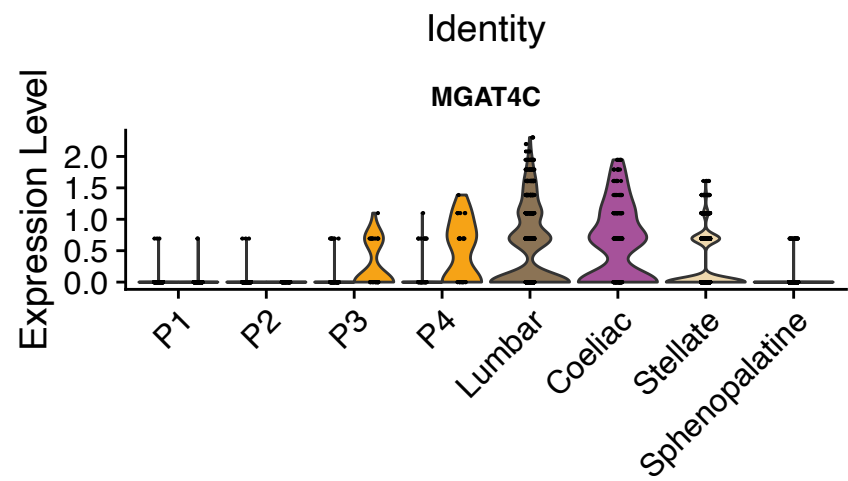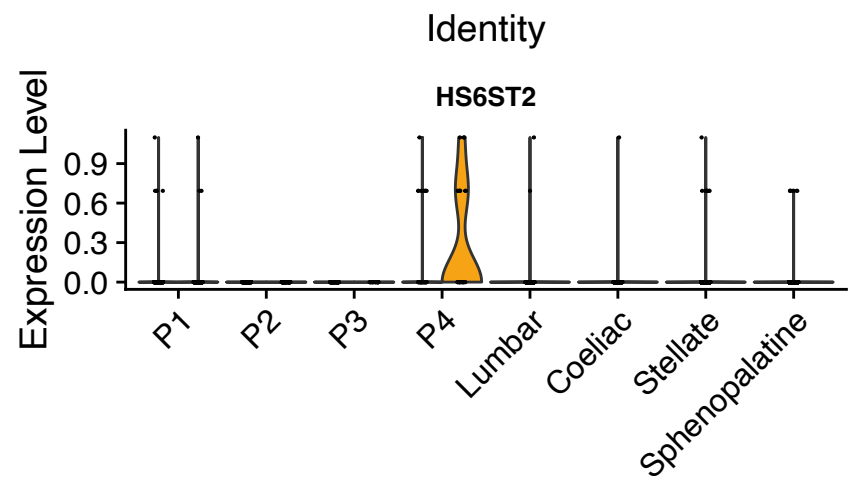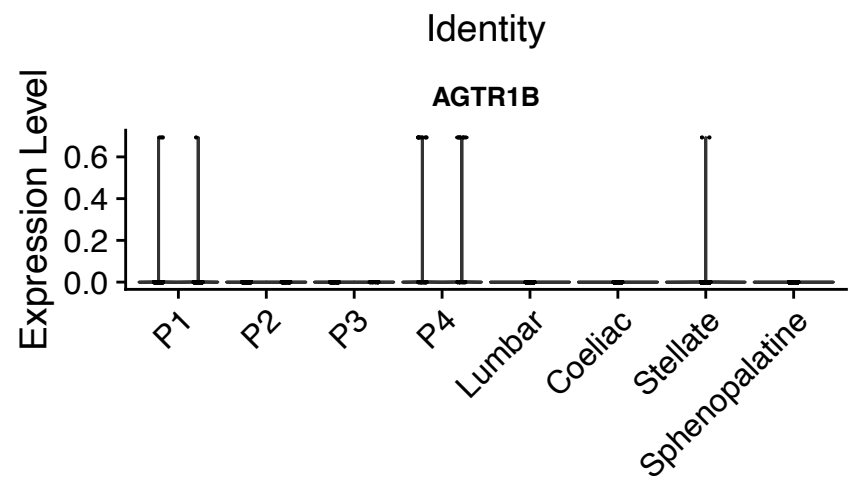

Identity

Identity

Identity

Identity

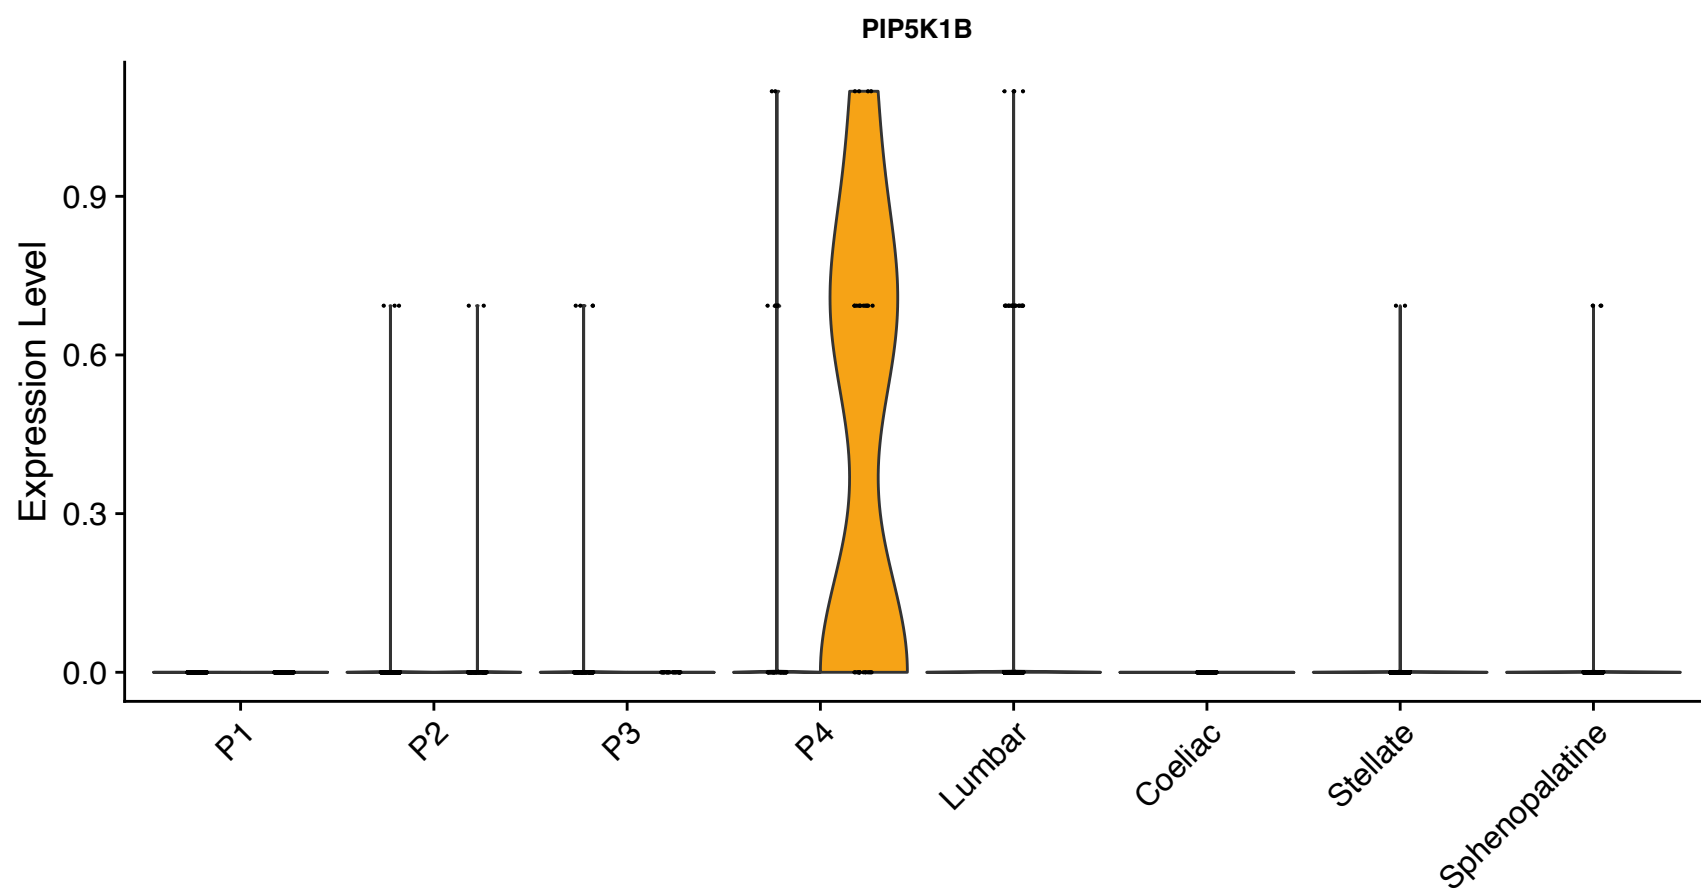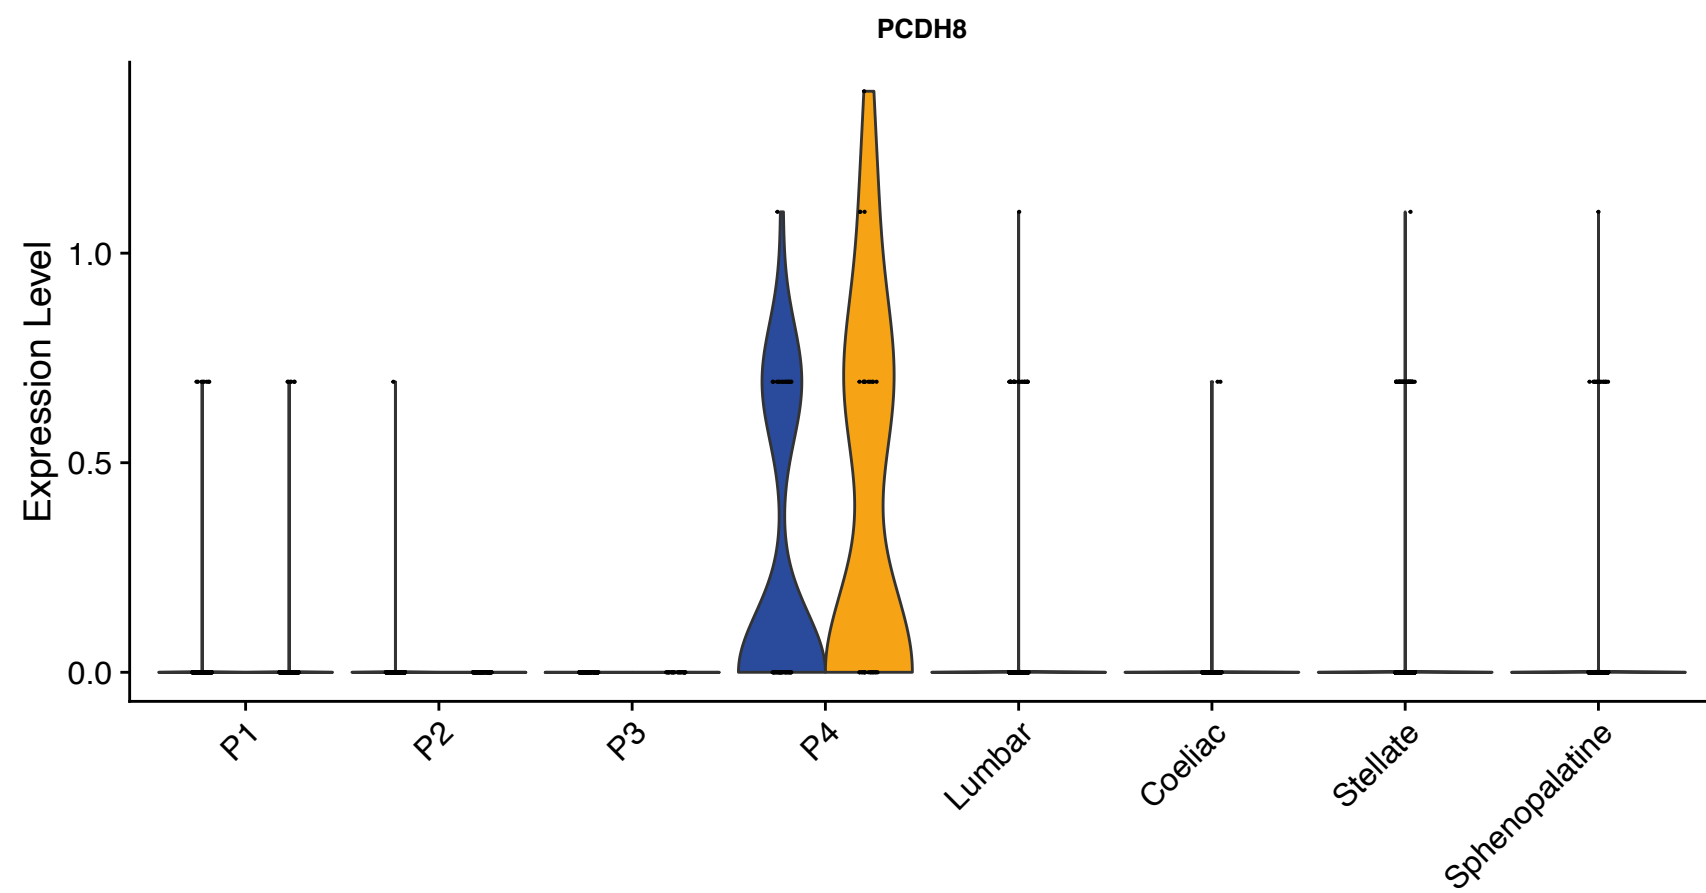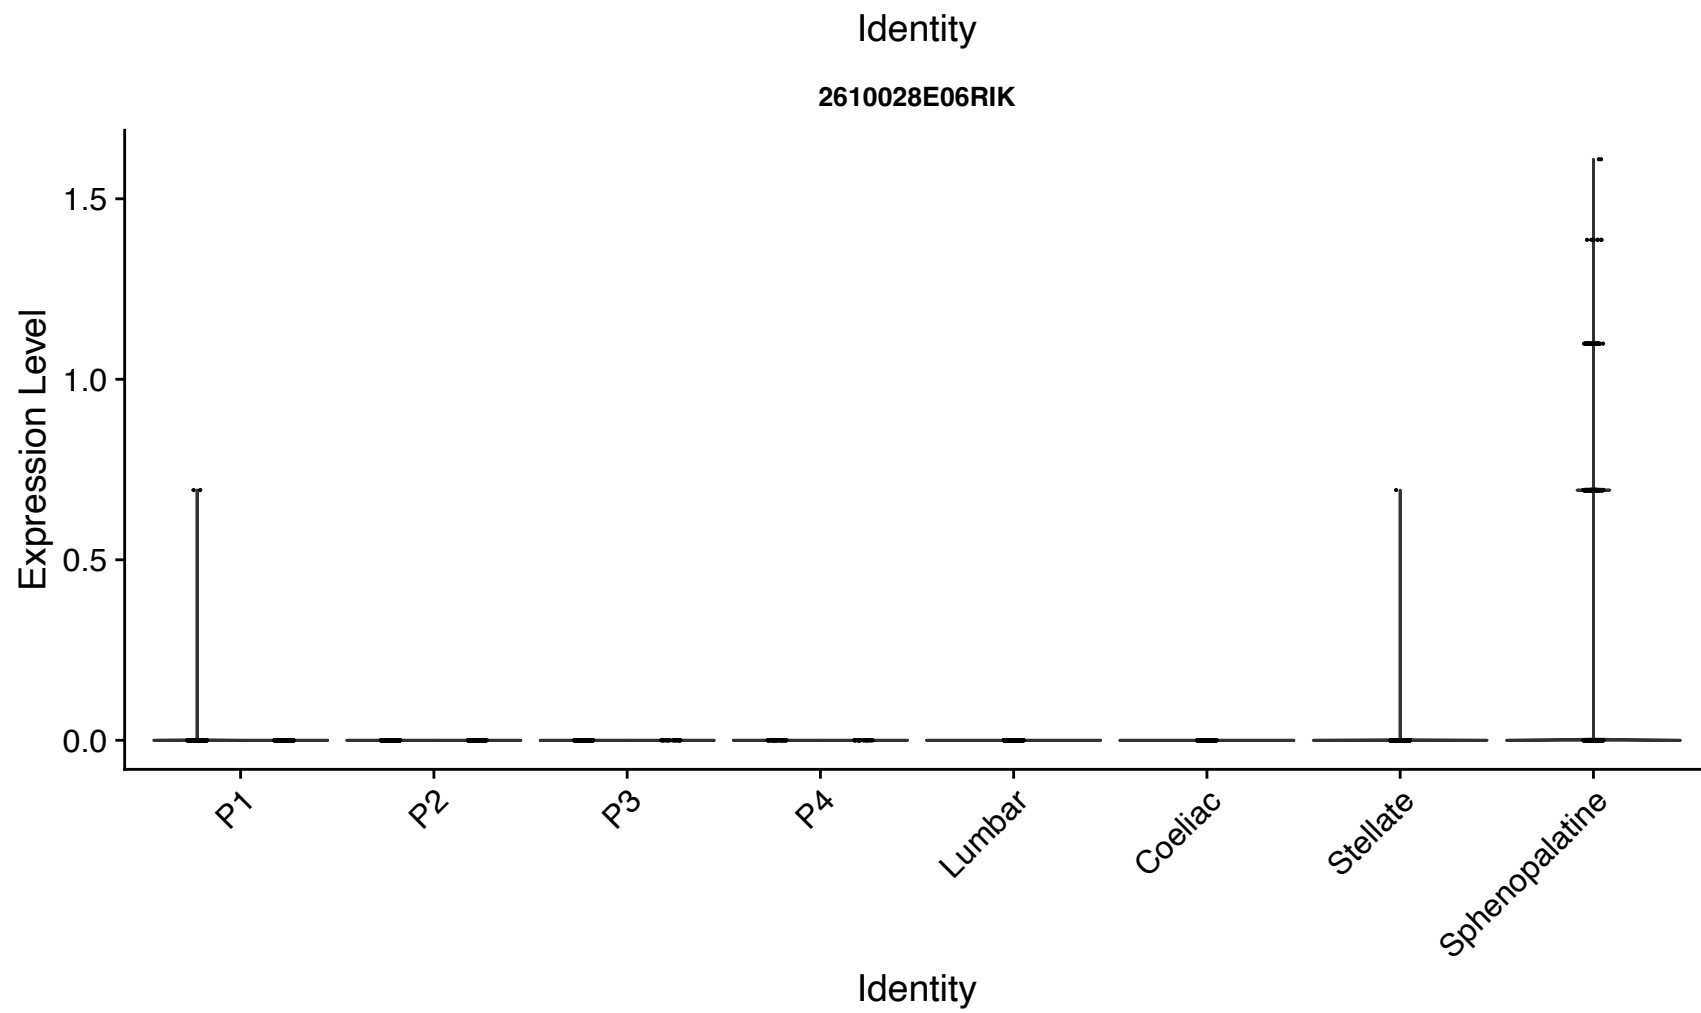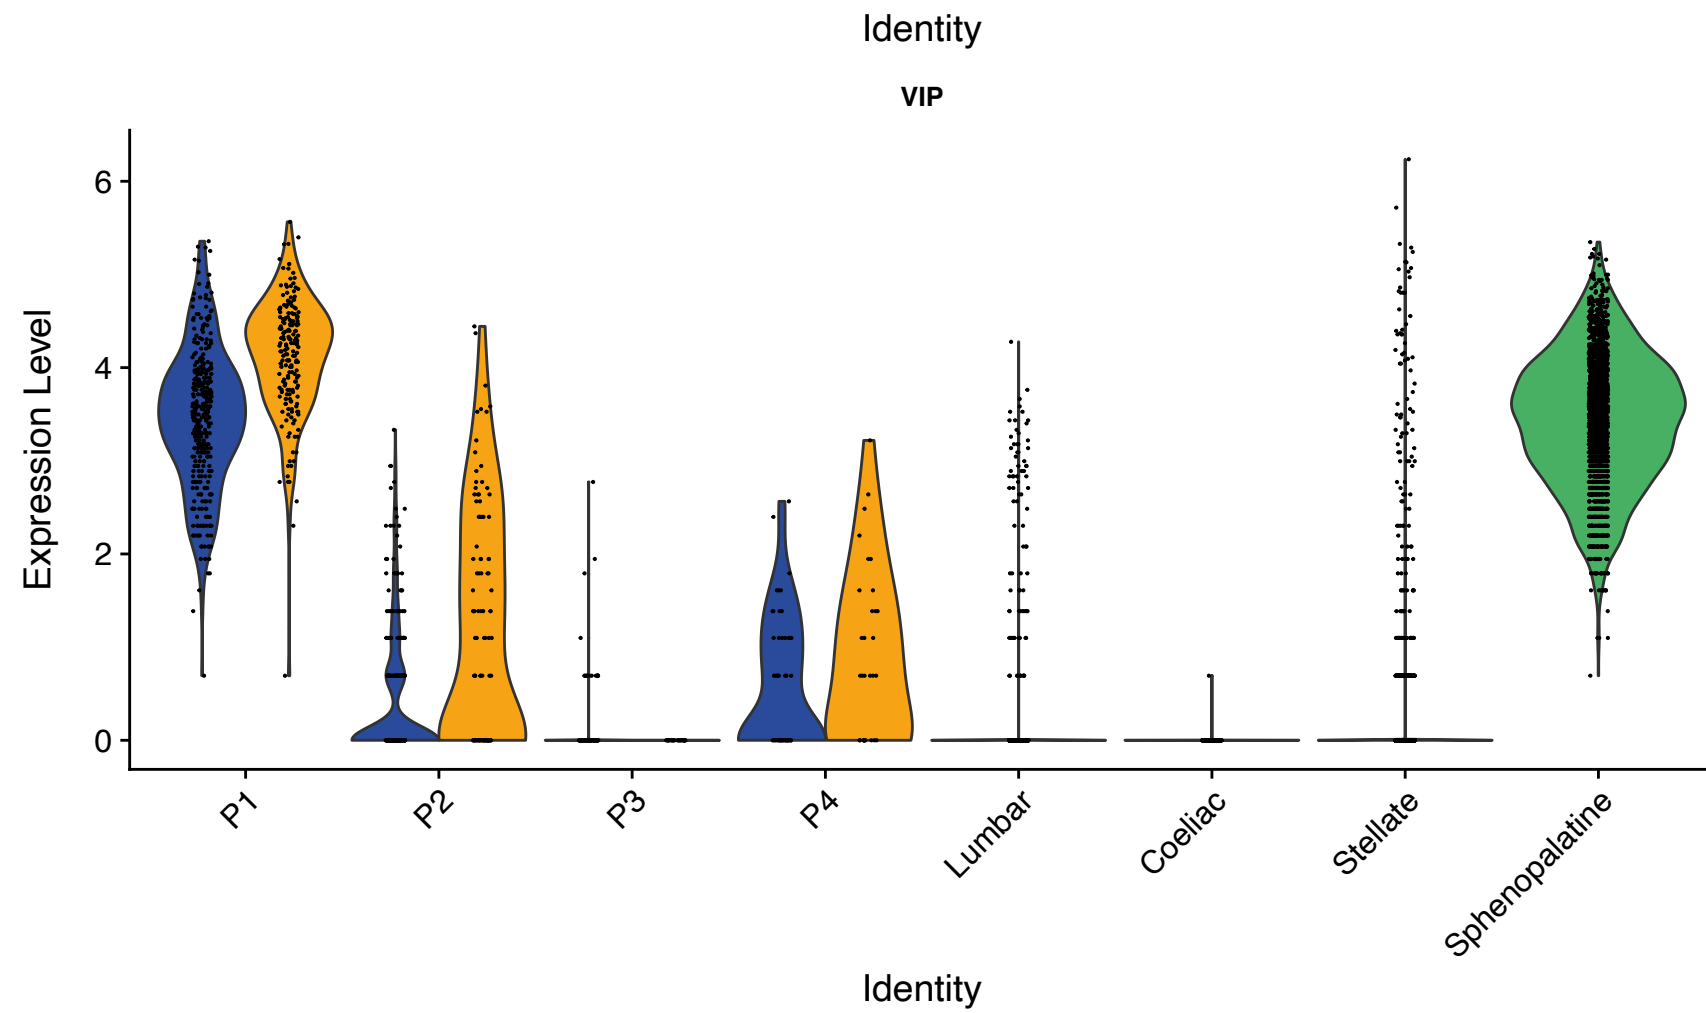

Supplement: supp2 [file elife-91576-supp2-v1.pdf]
