# Supplementary material for: The pelvic organs receive no parasympathetic innervation
Source: eLife journal article supplement (doi:10.7554/elife.91576), 2023-10-17

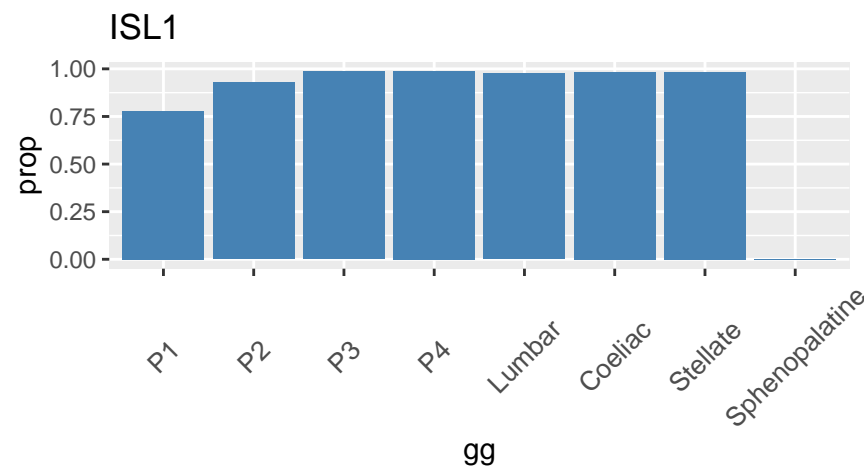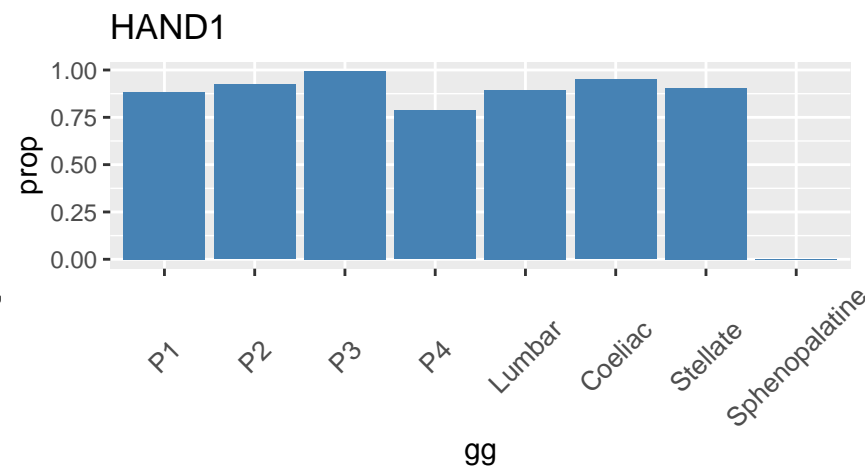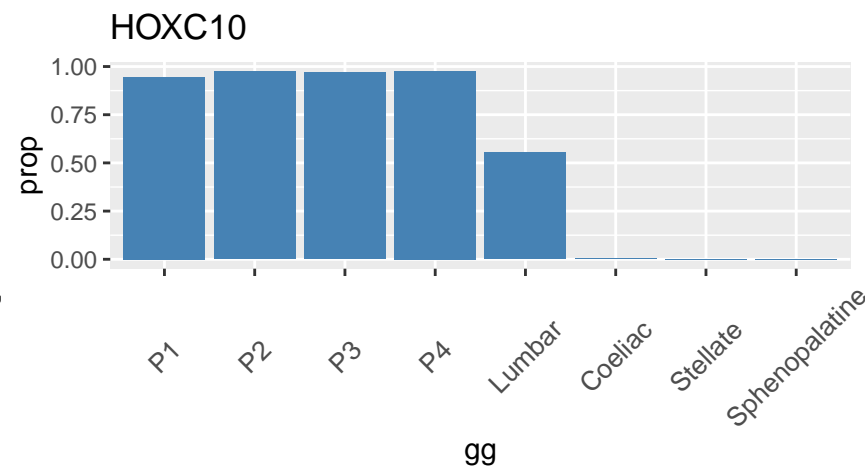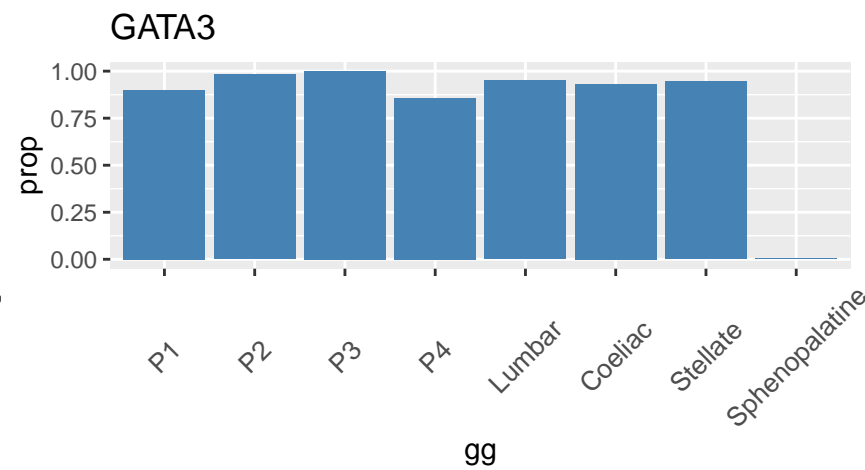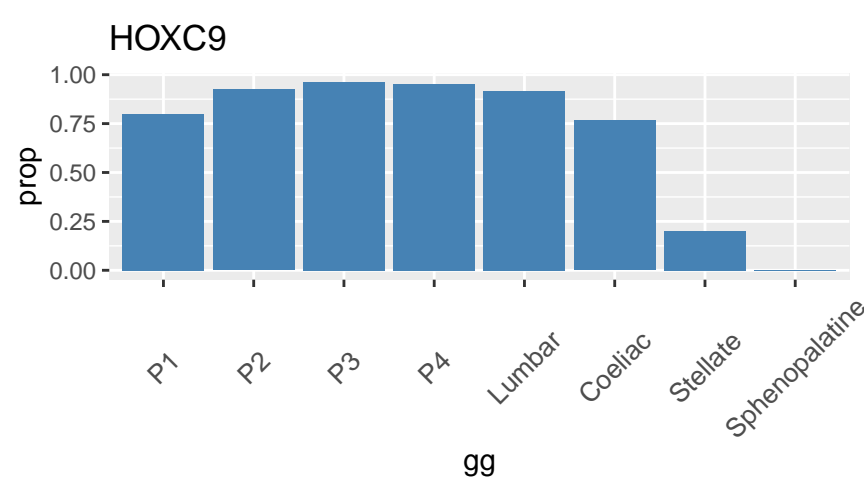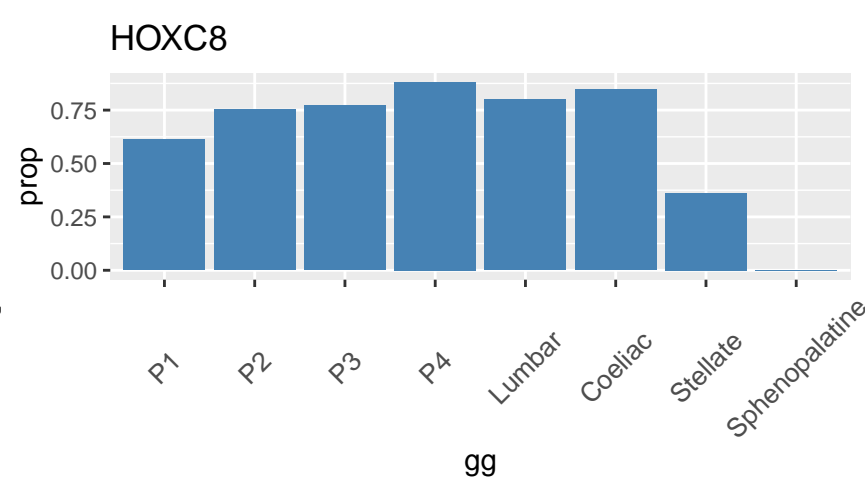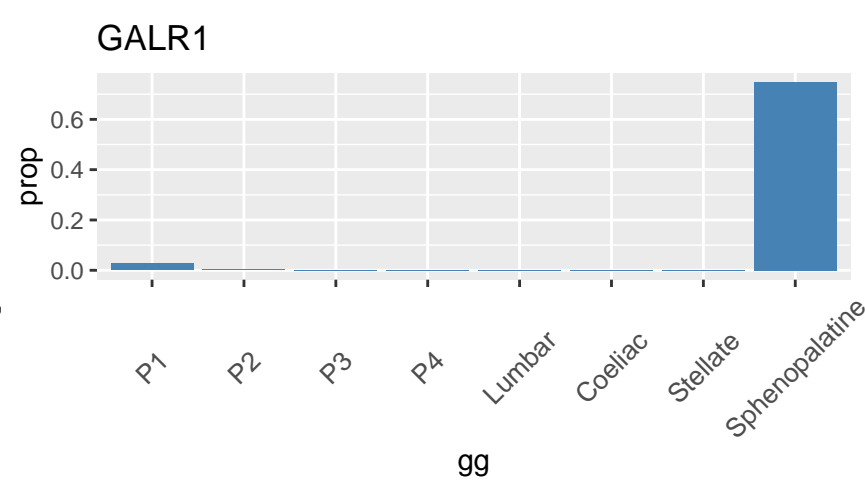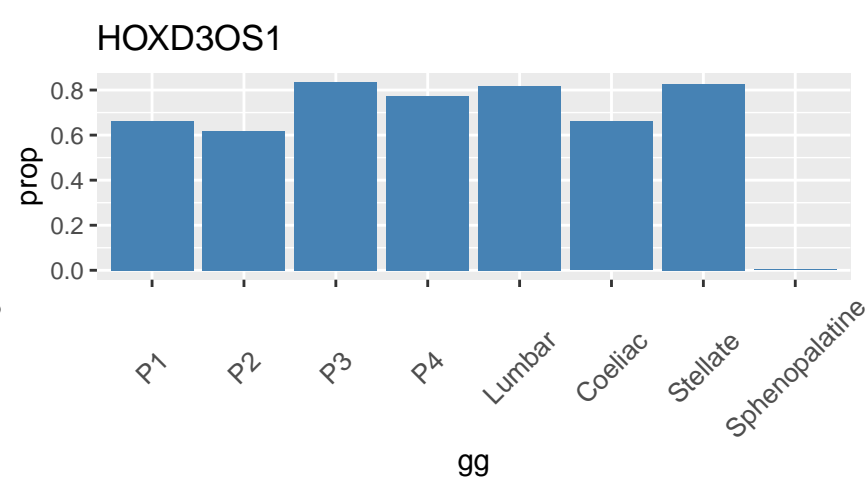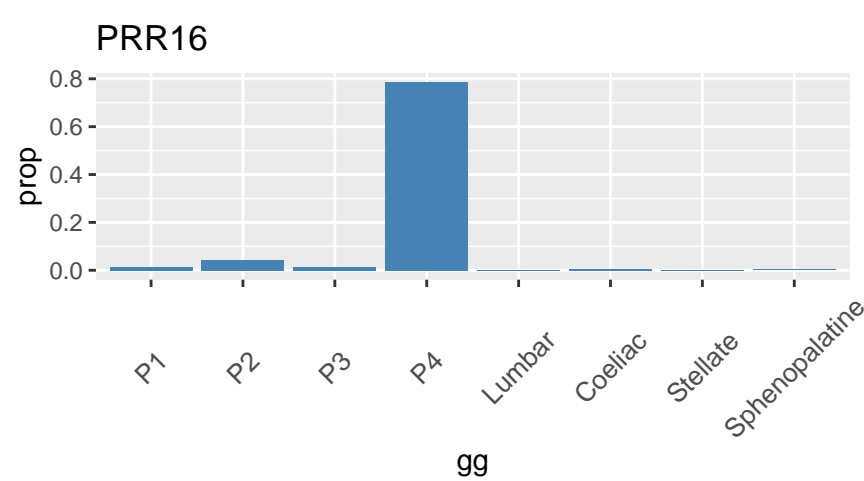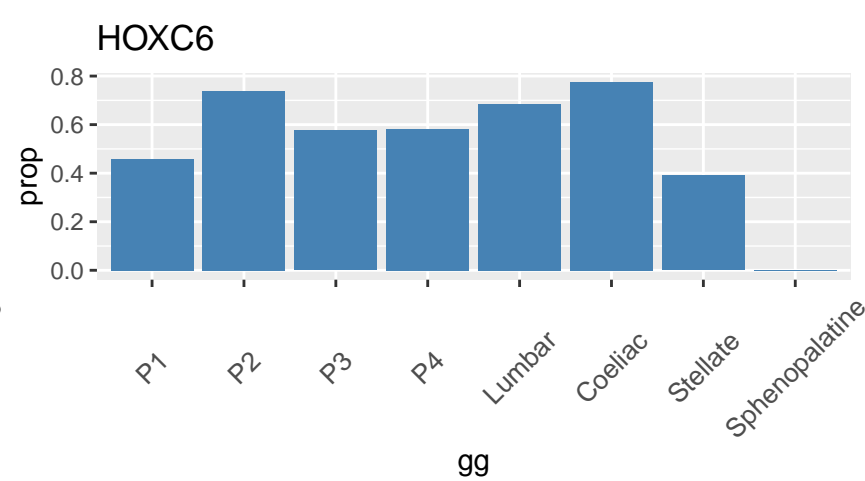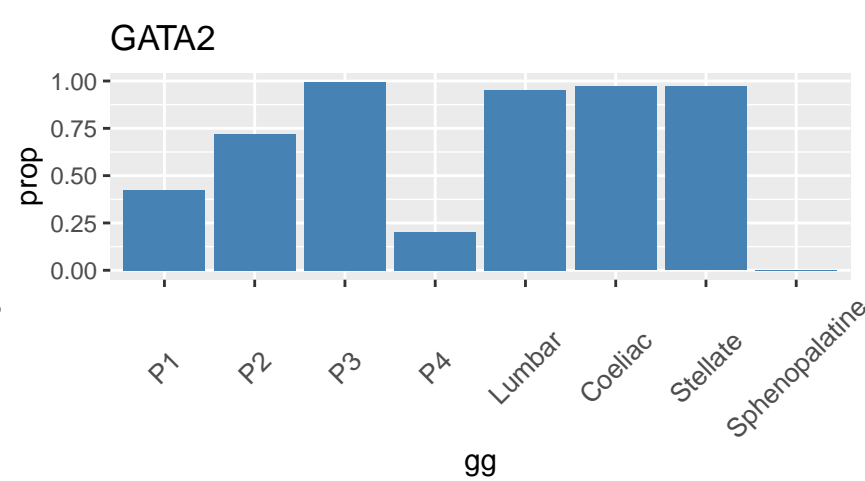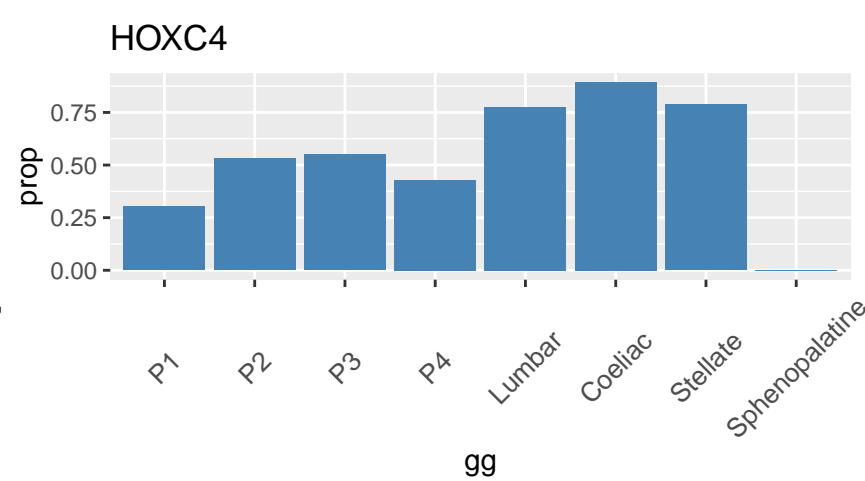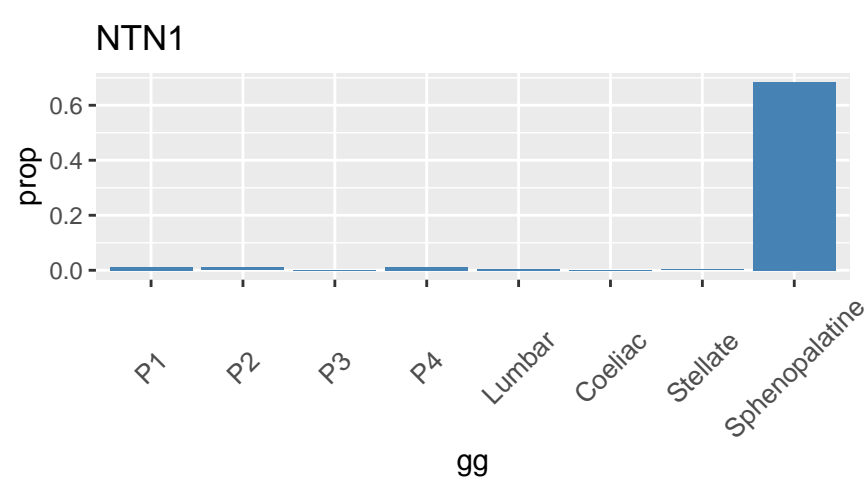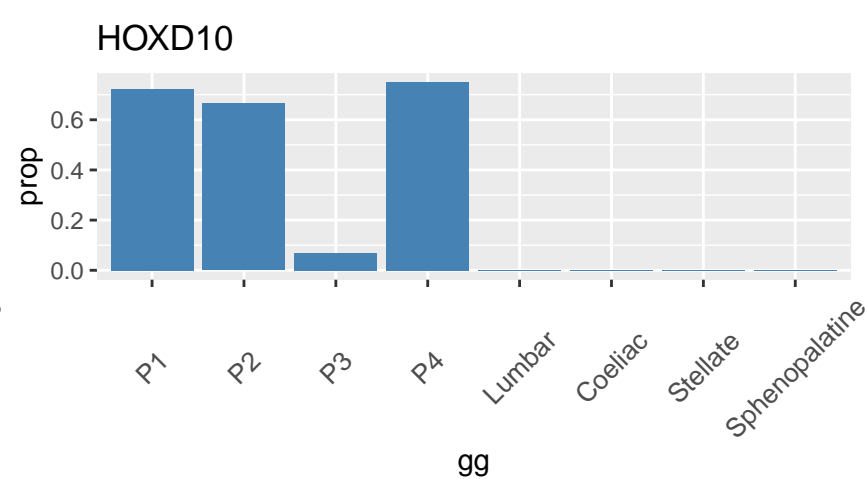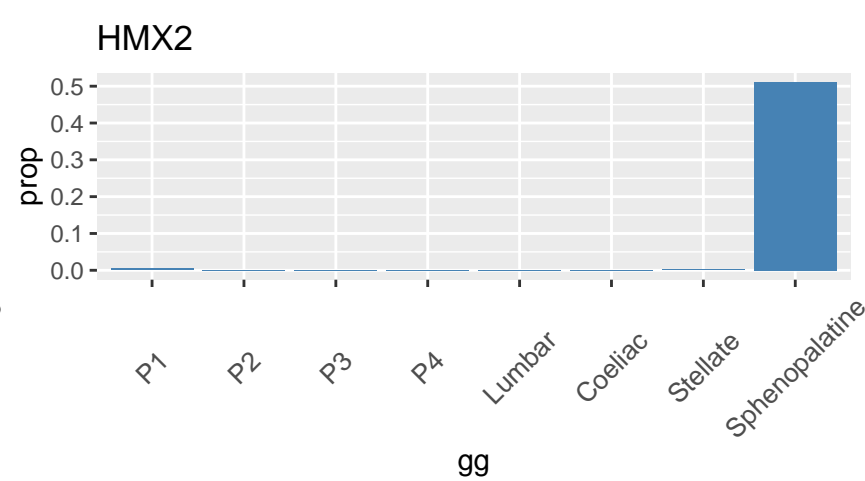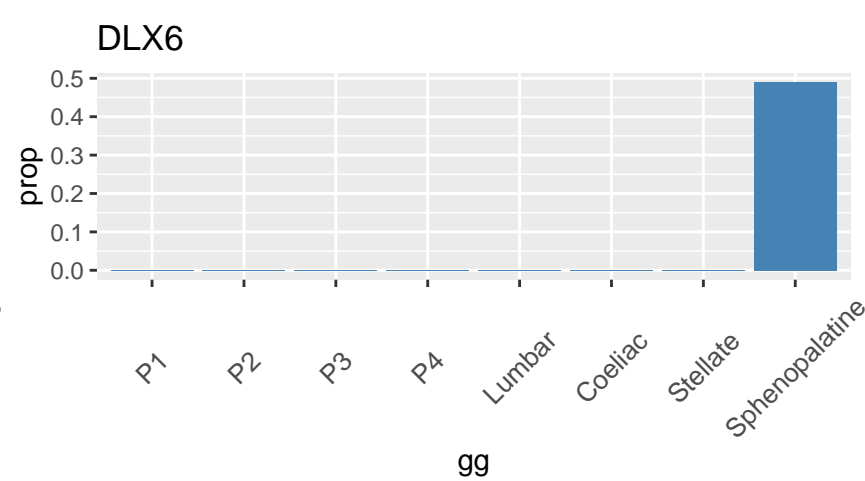

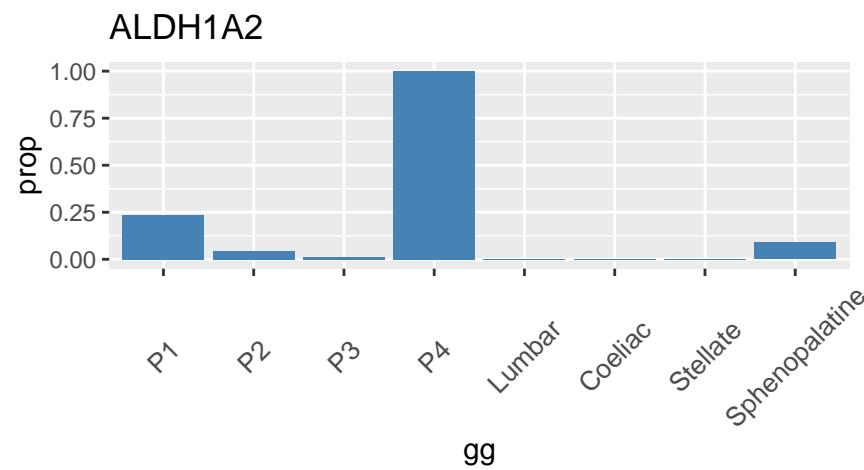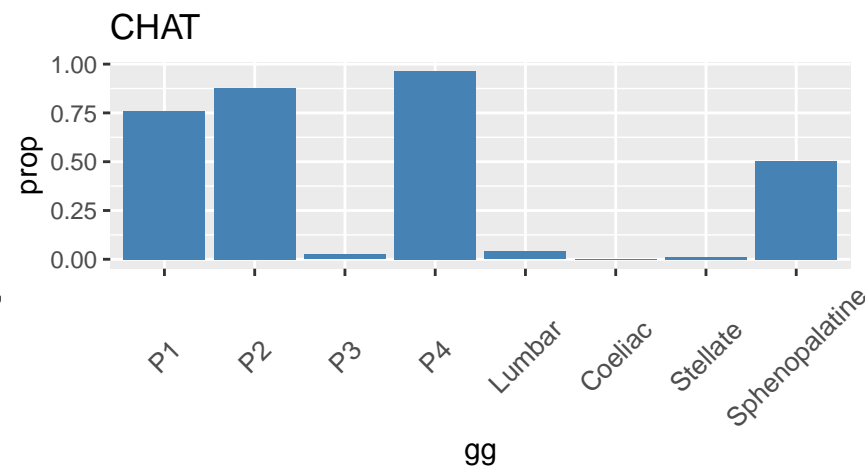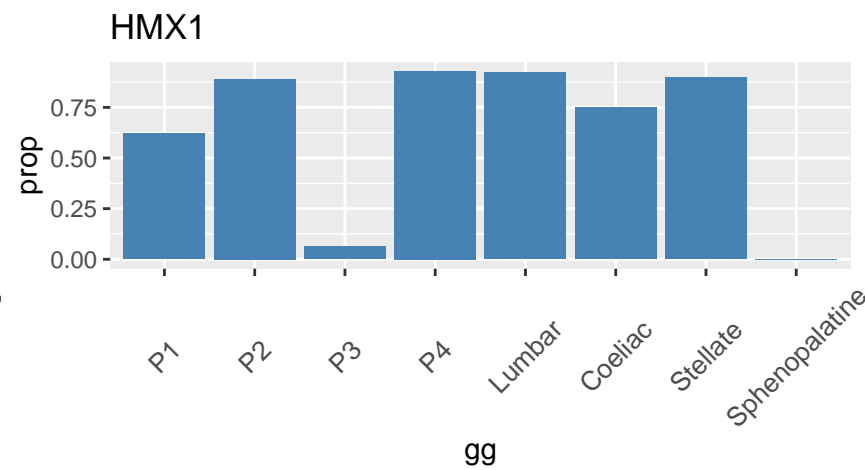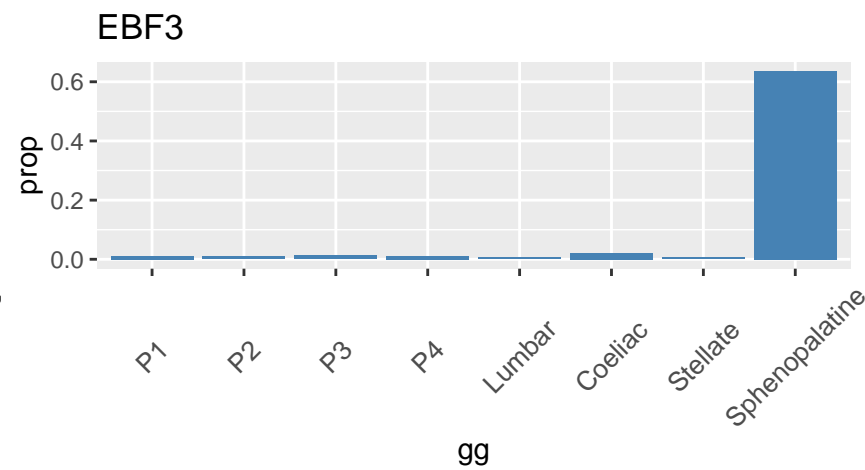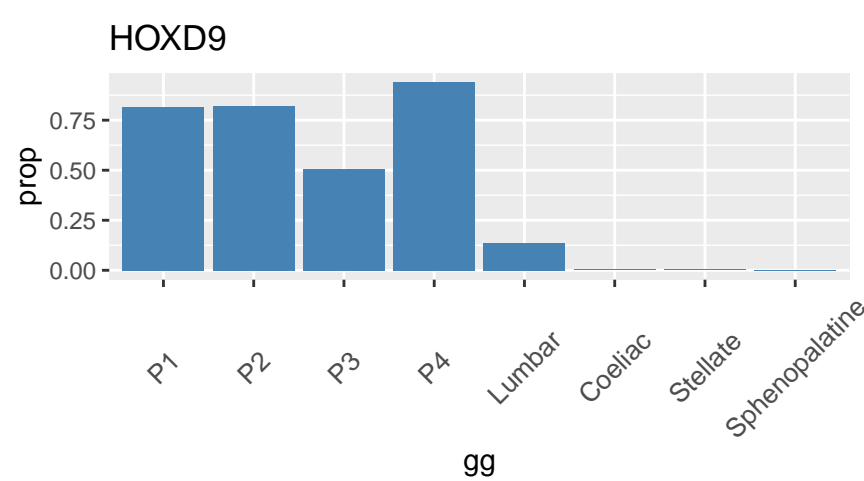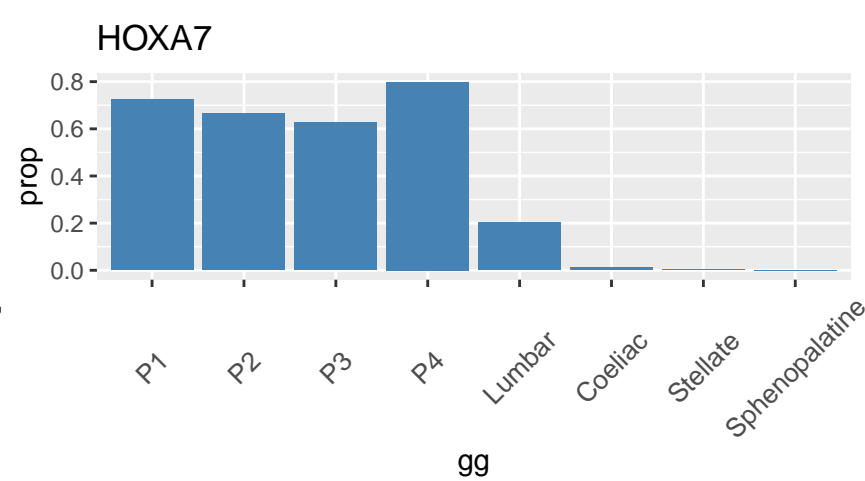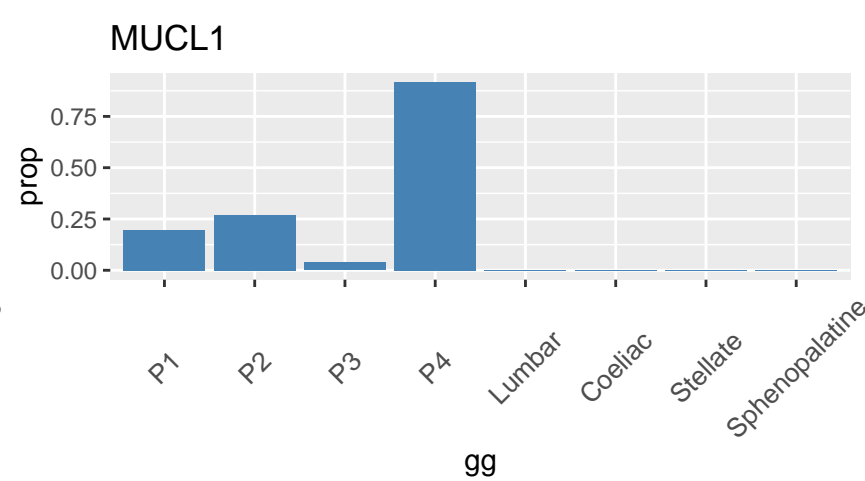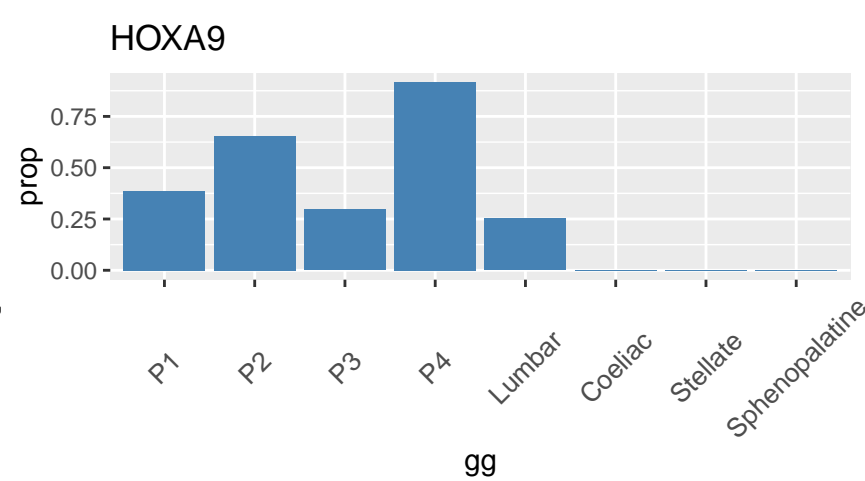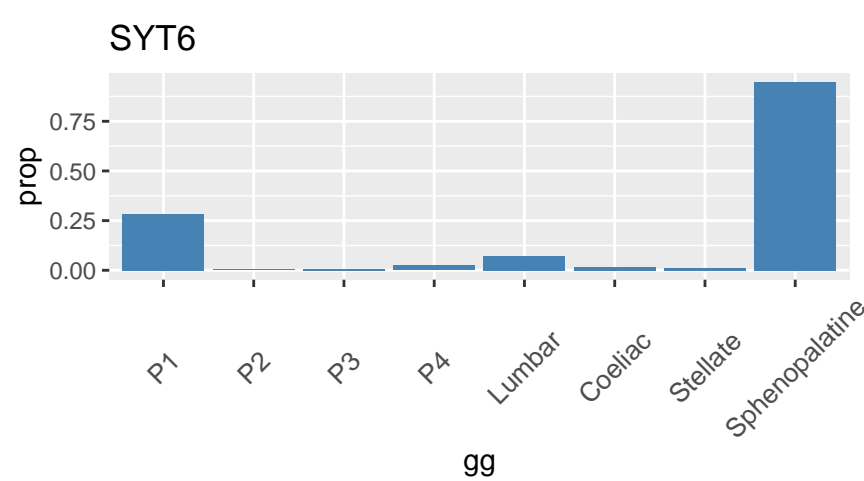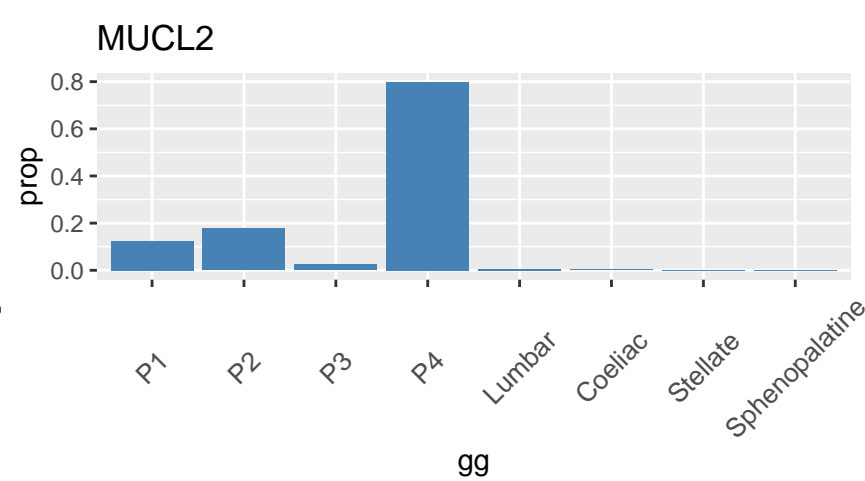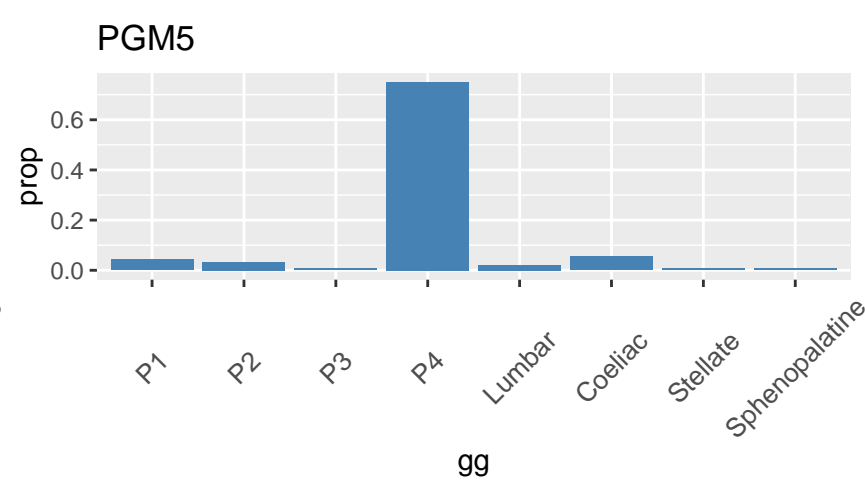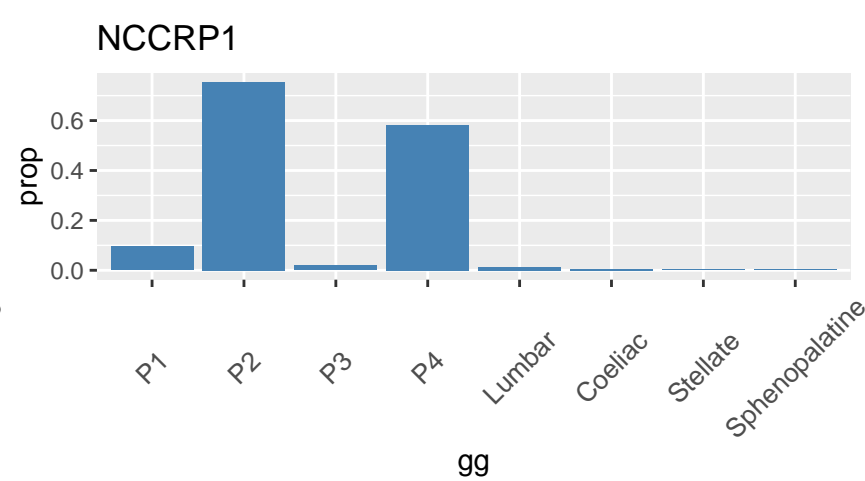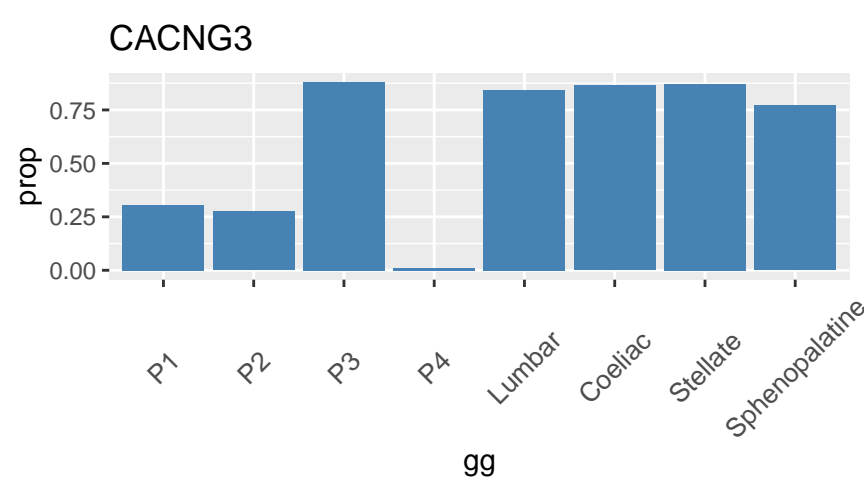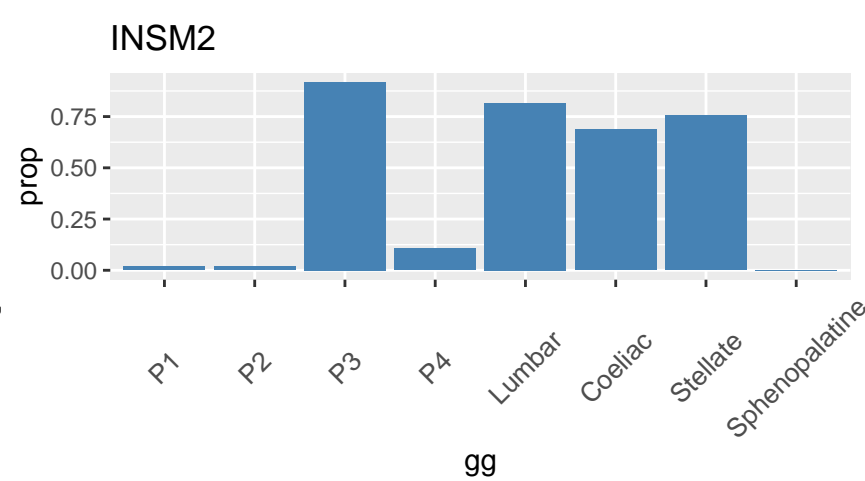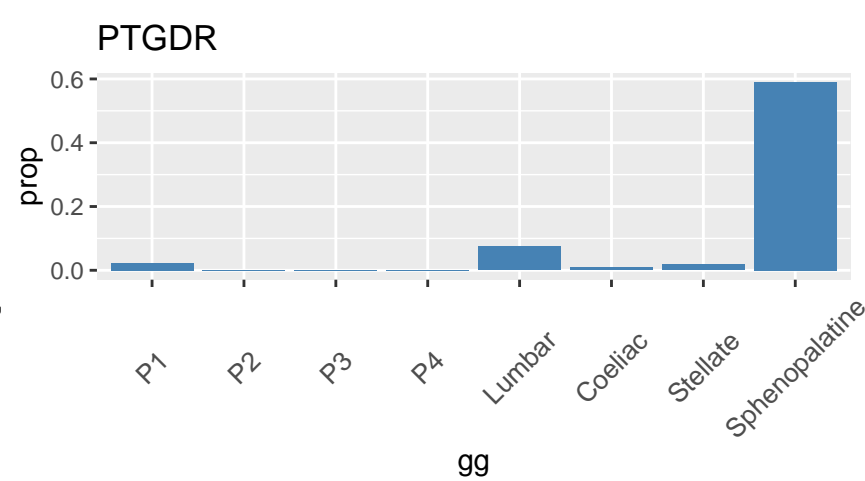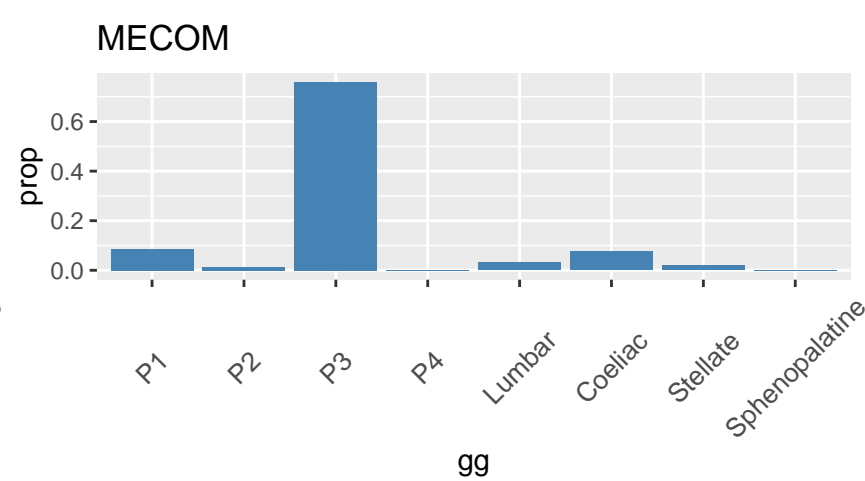

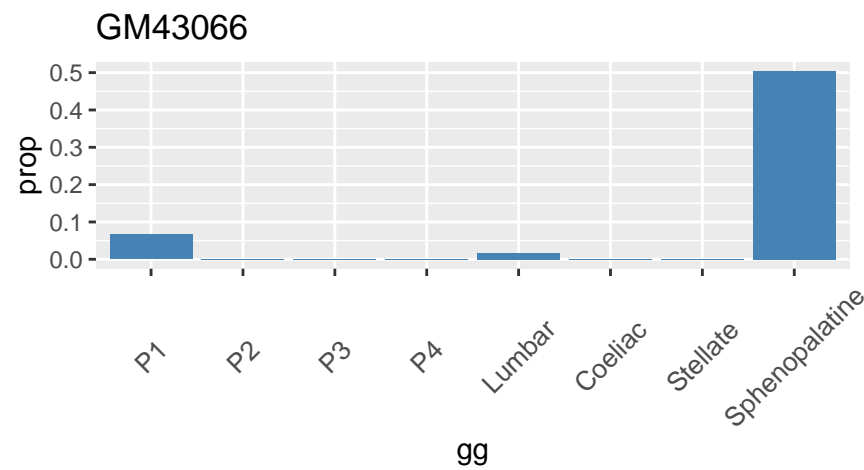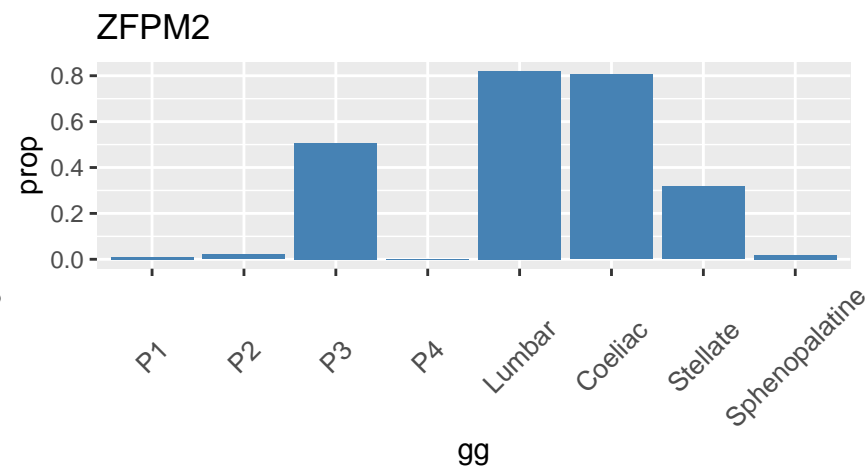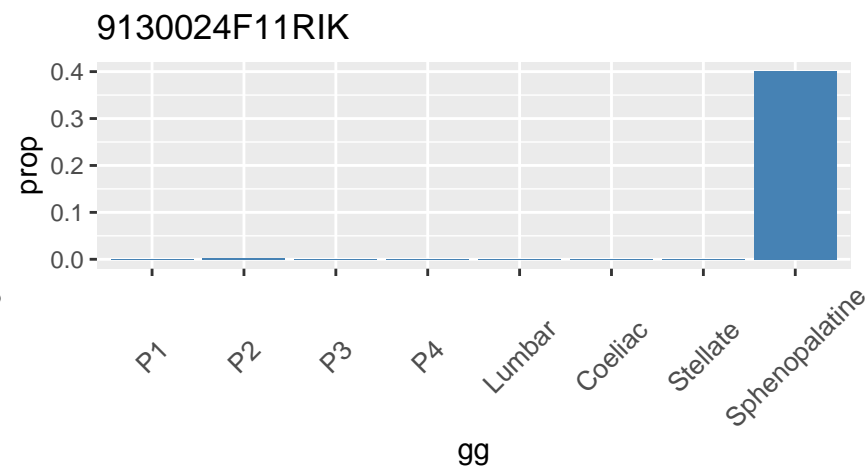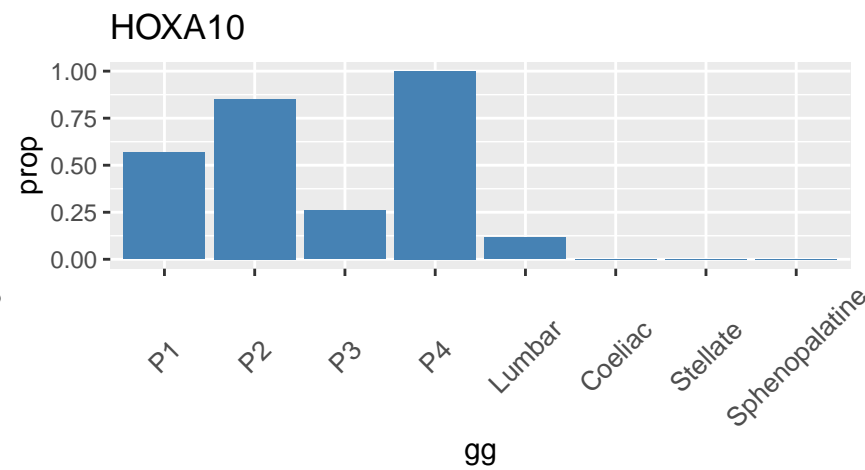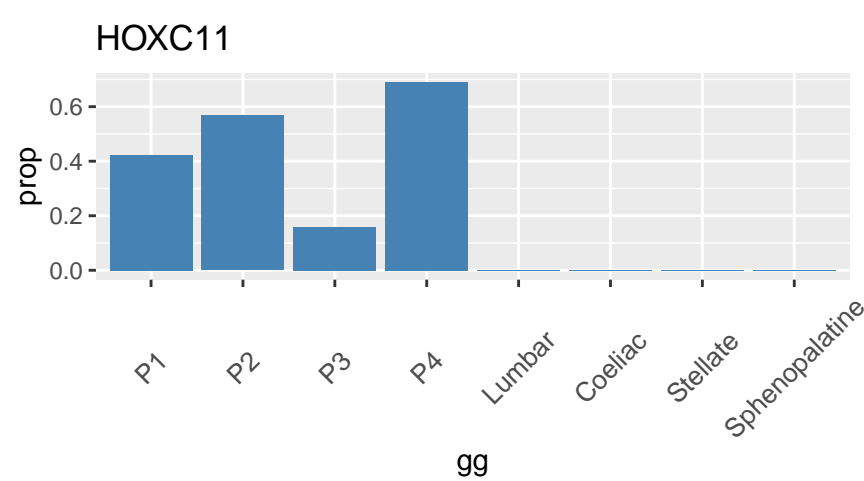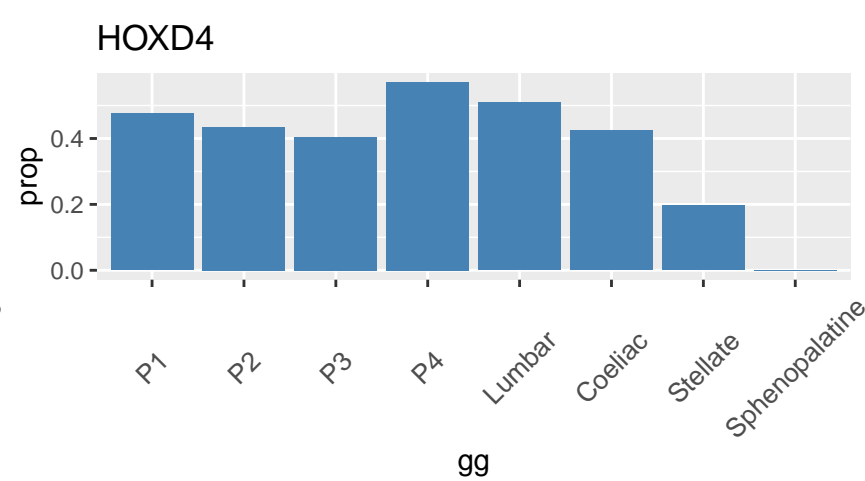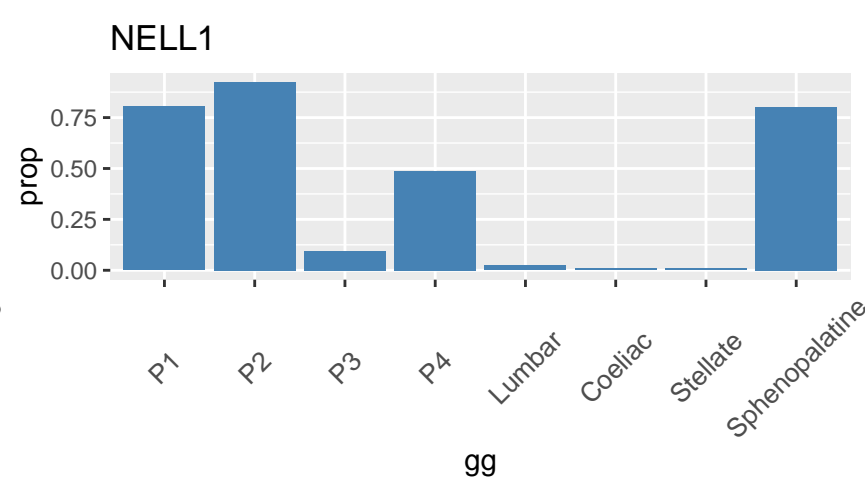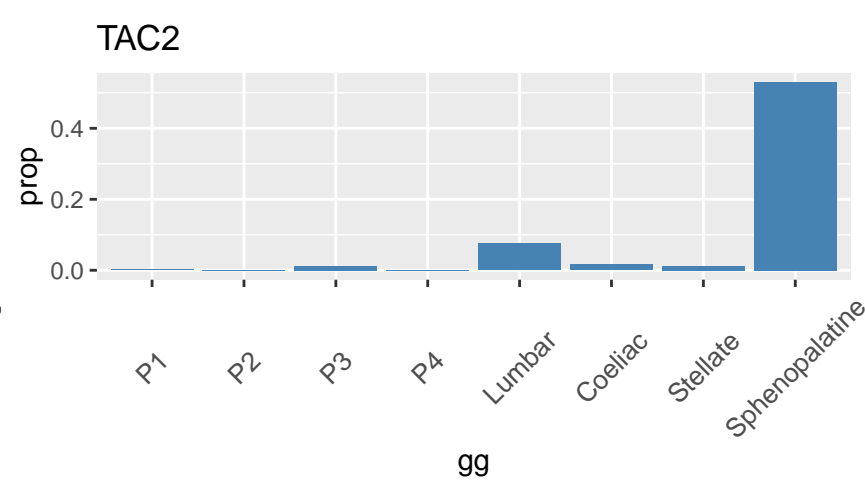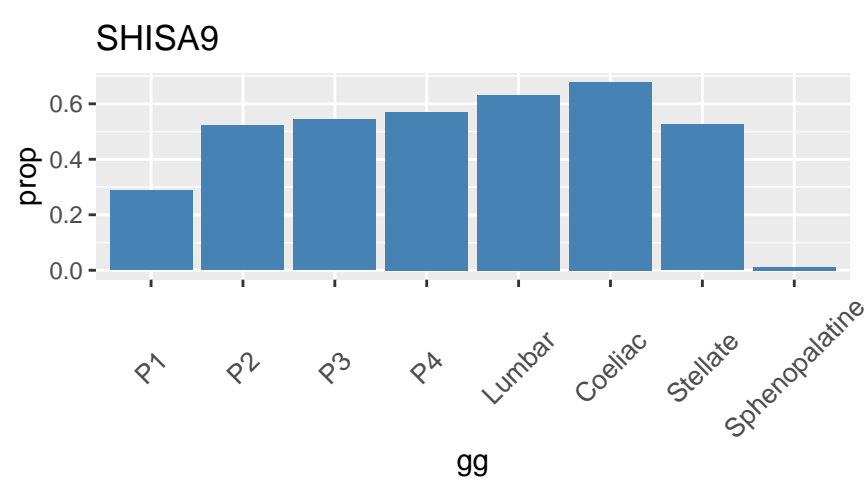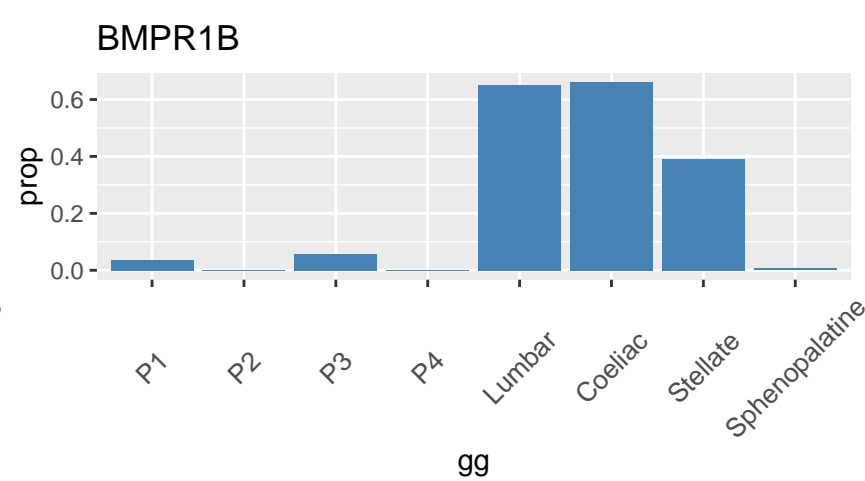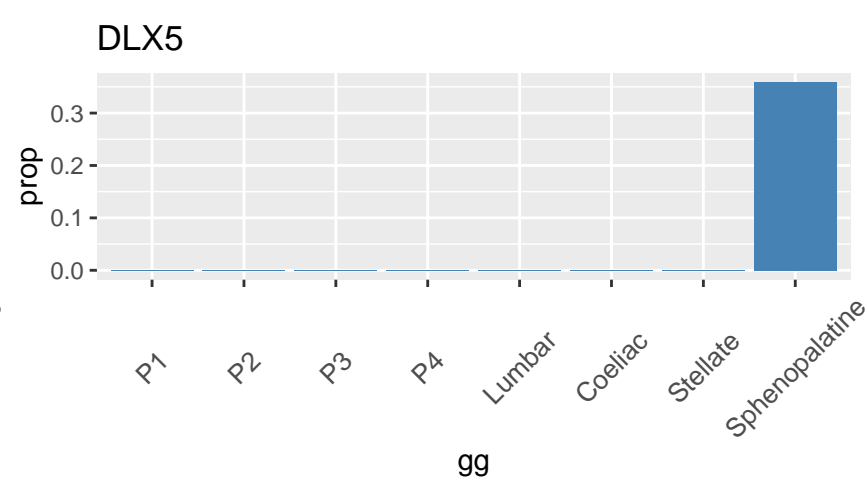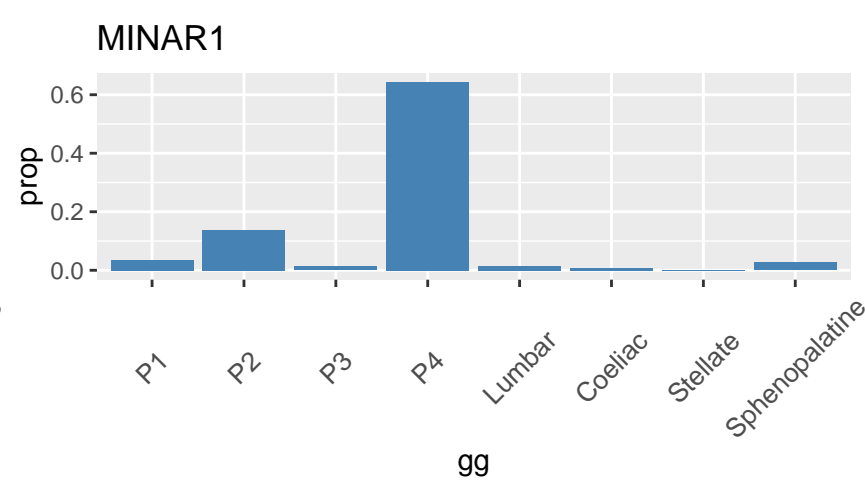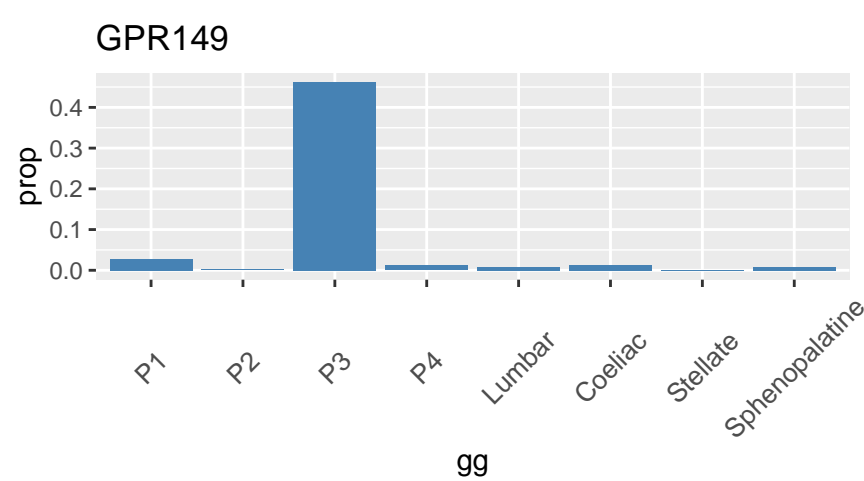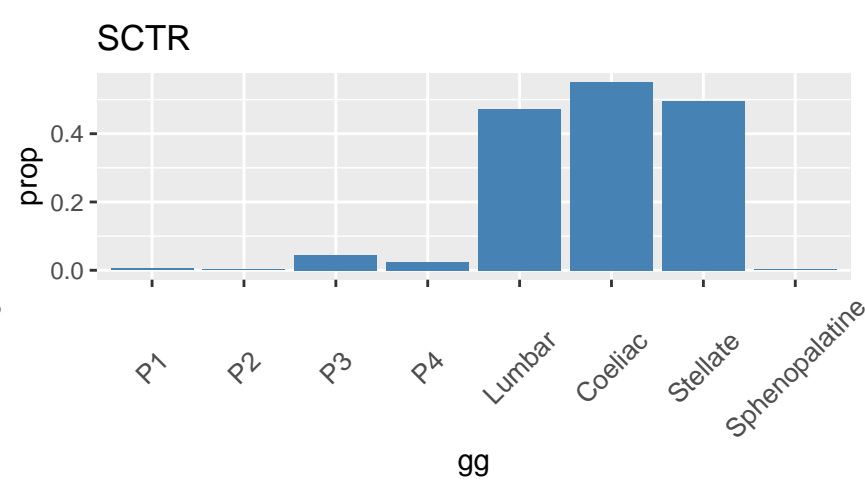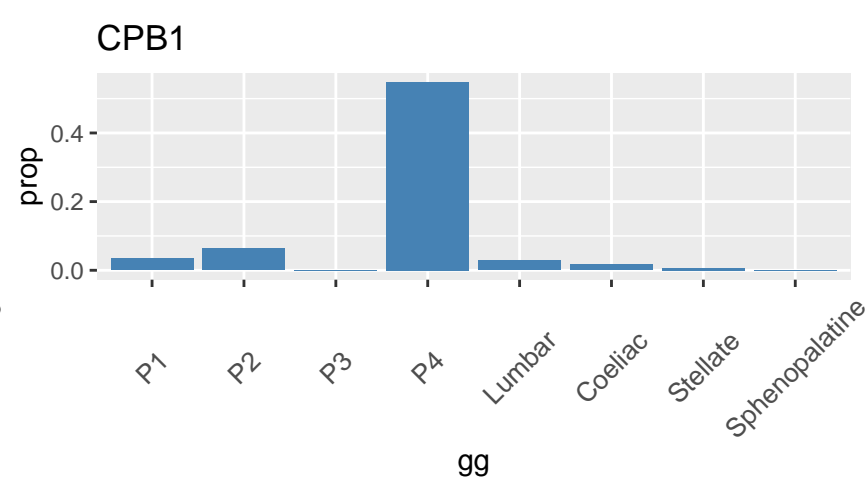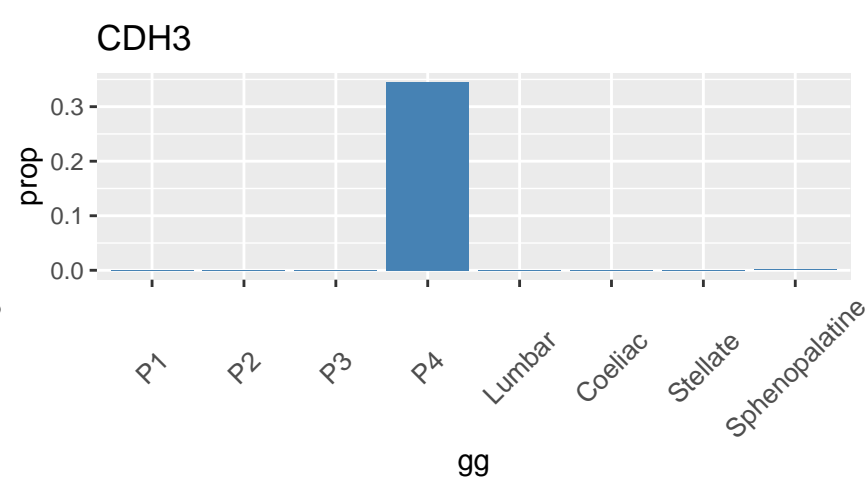

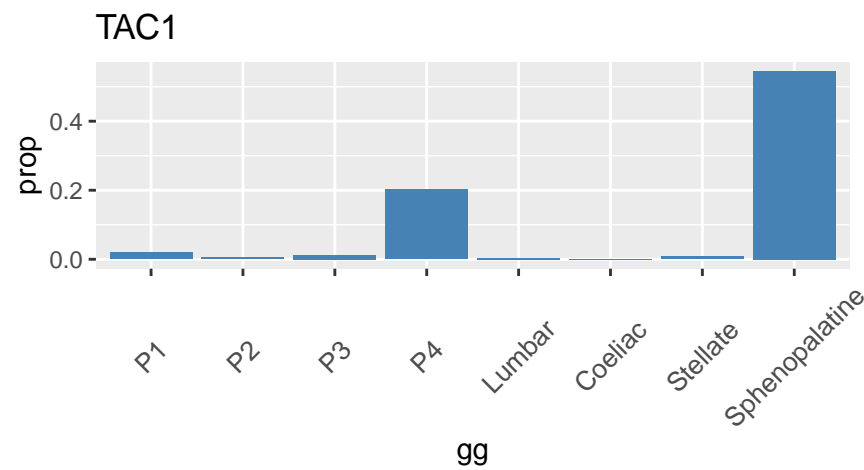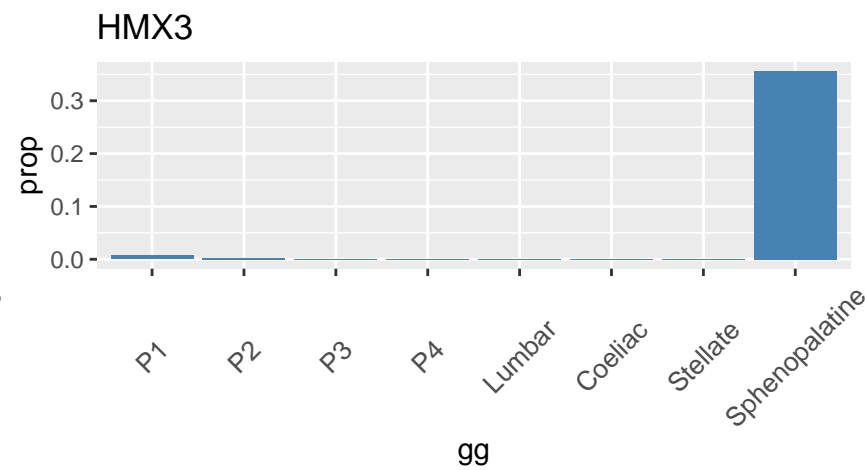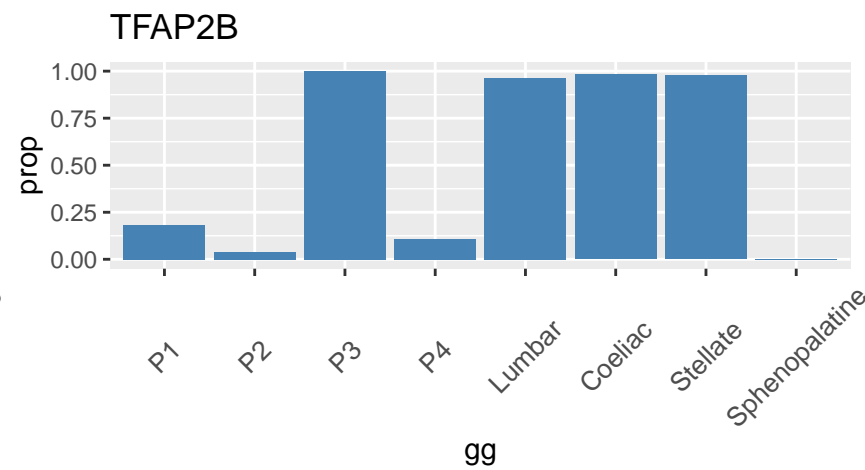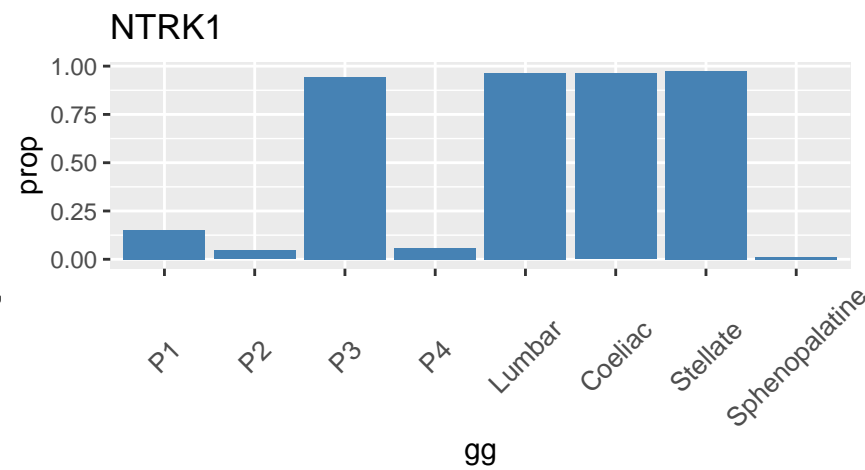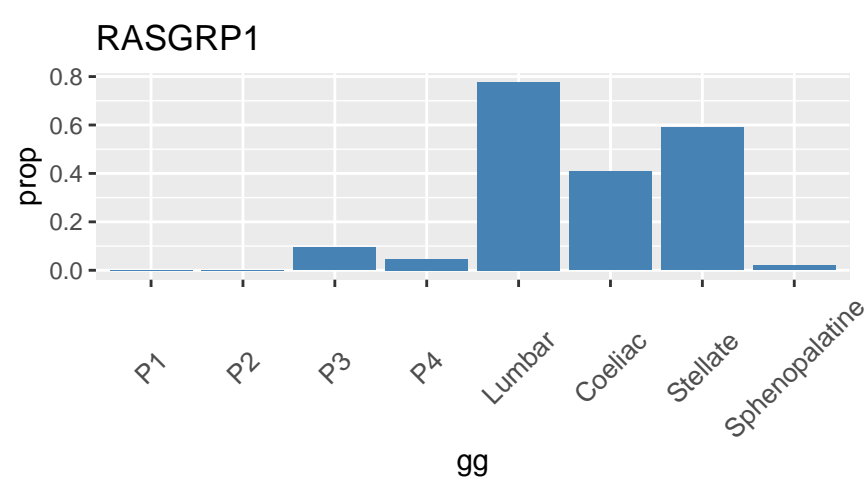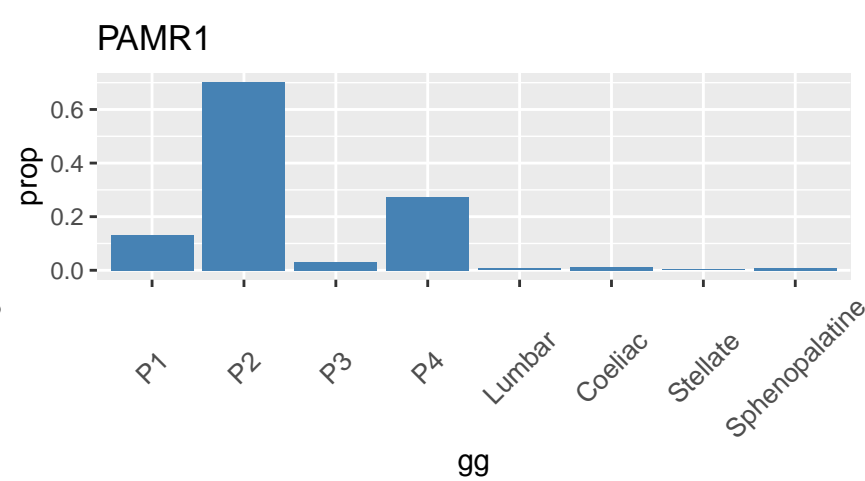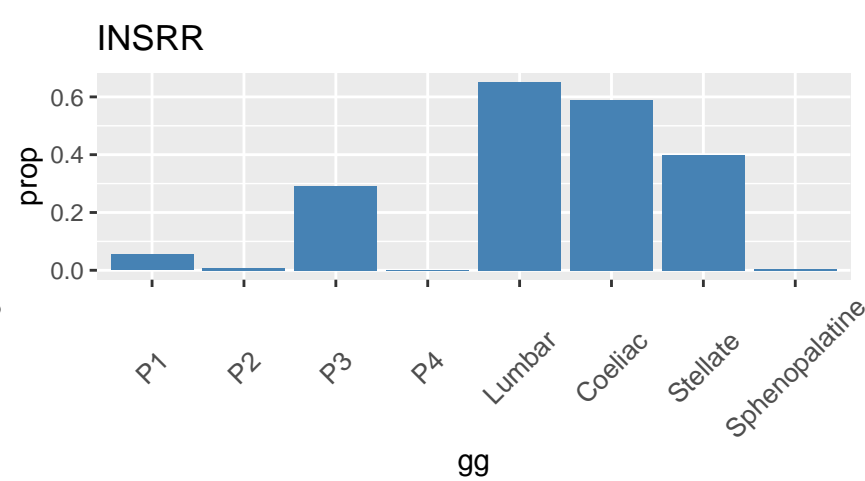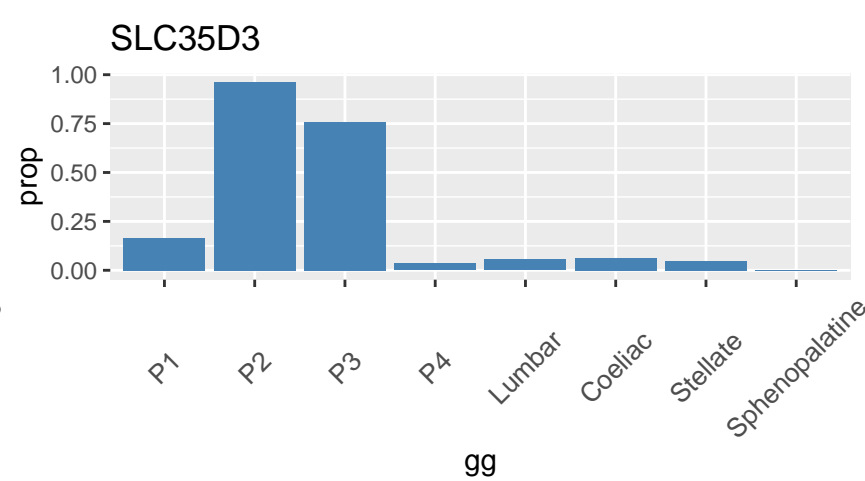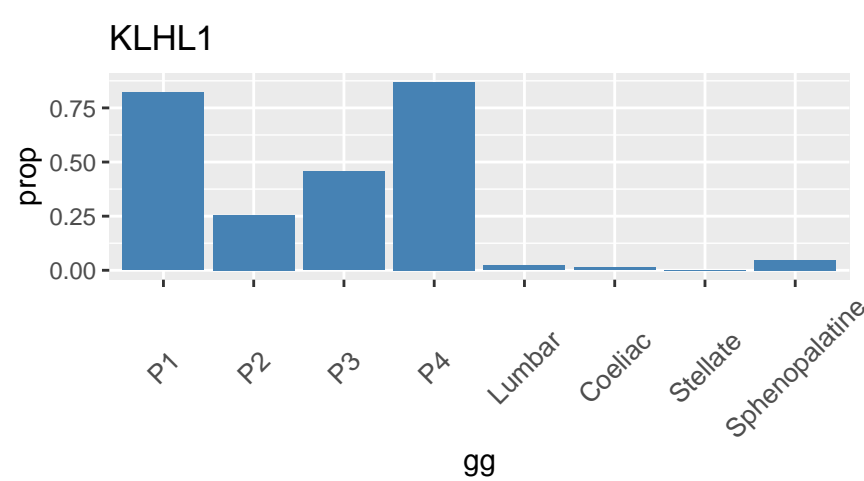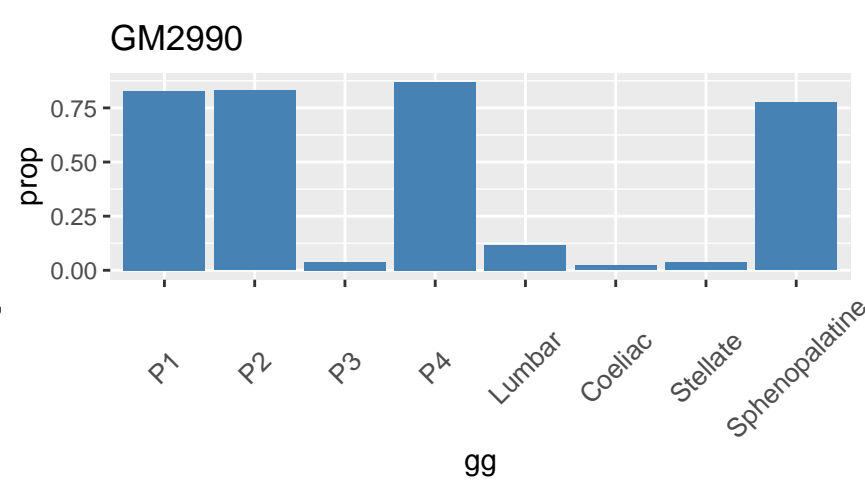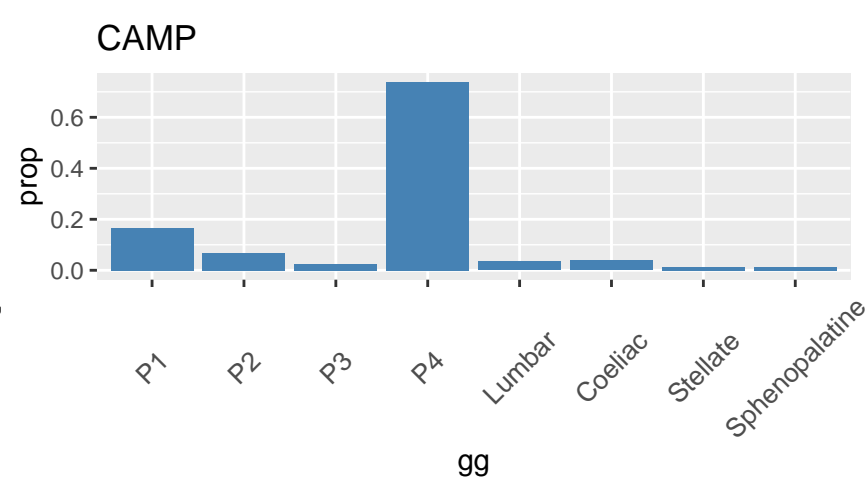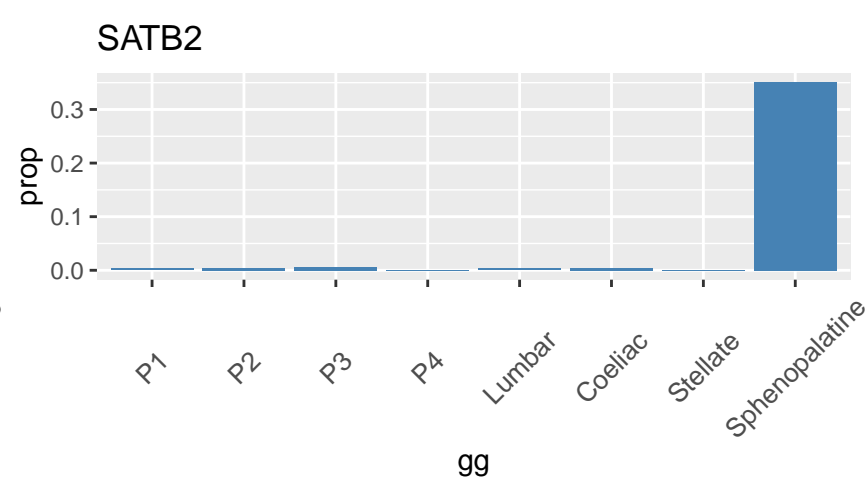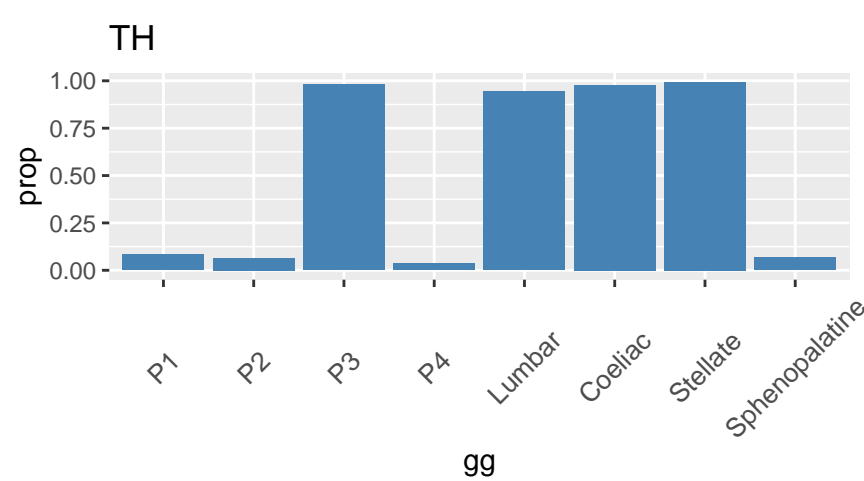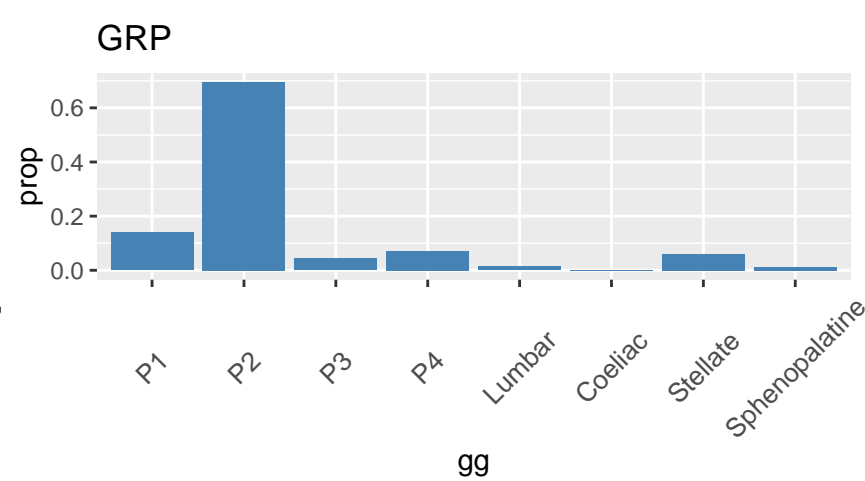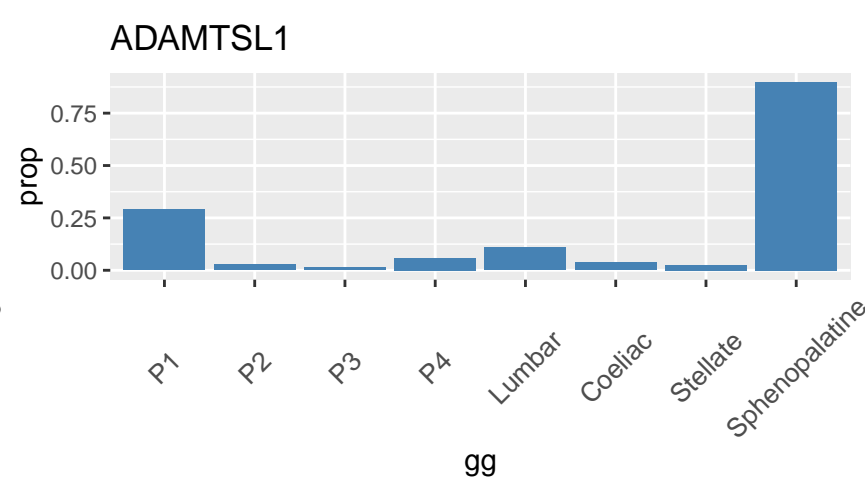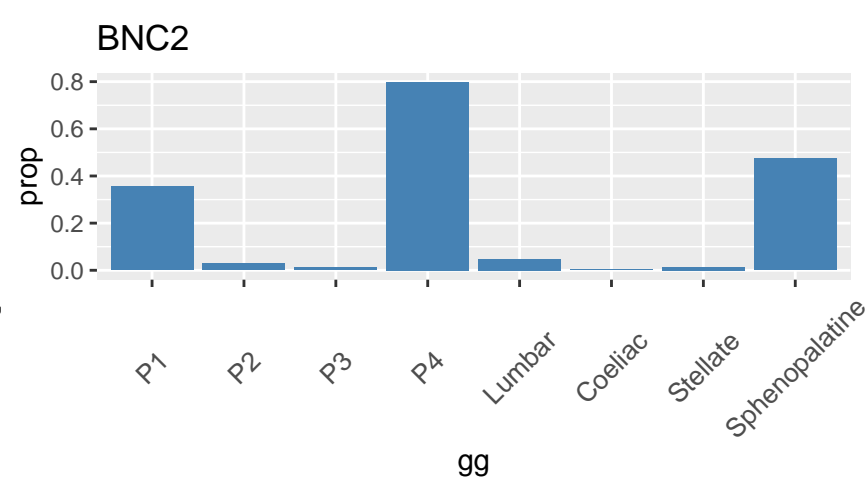

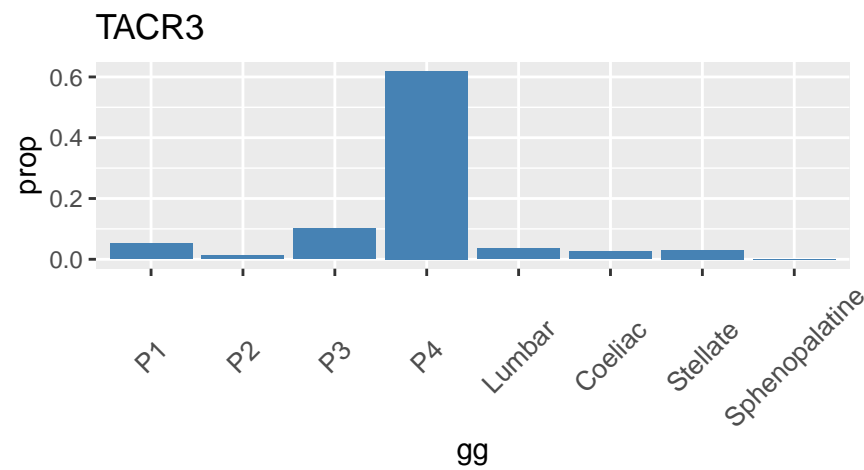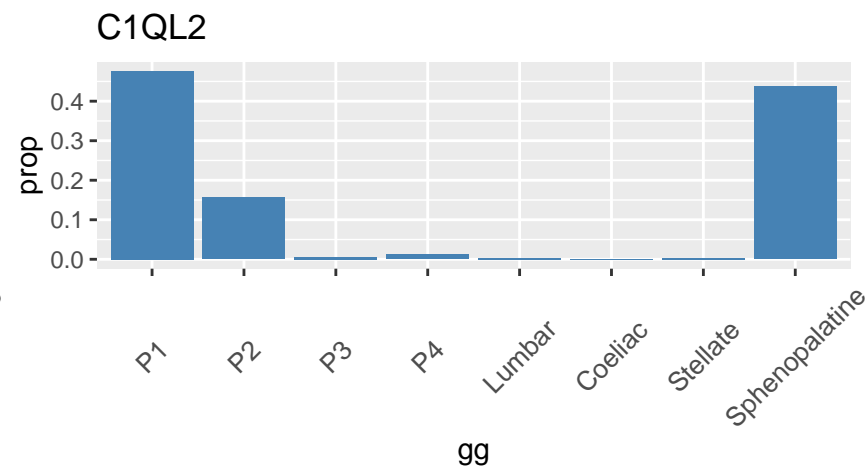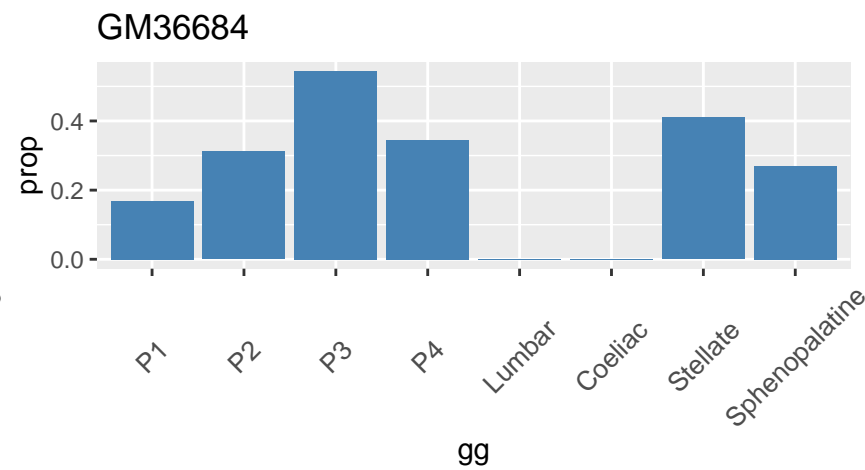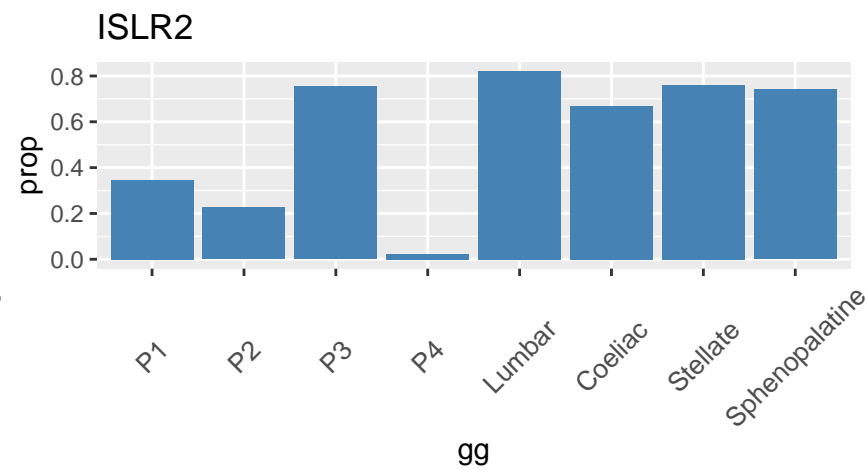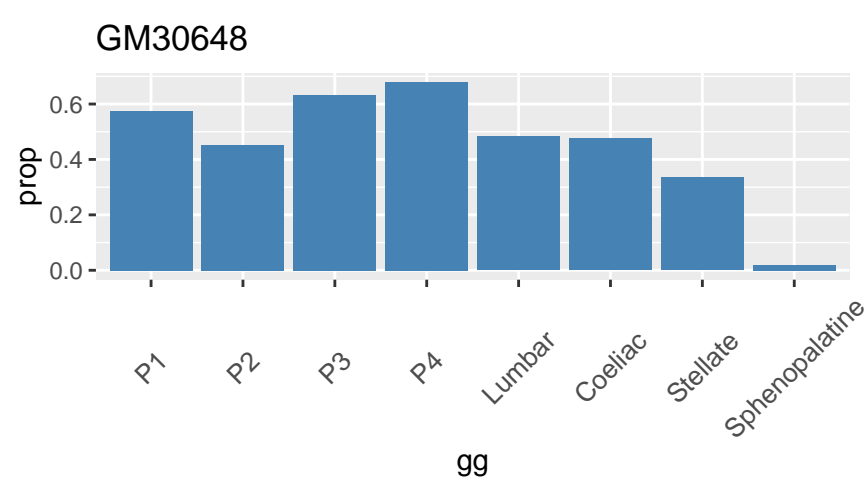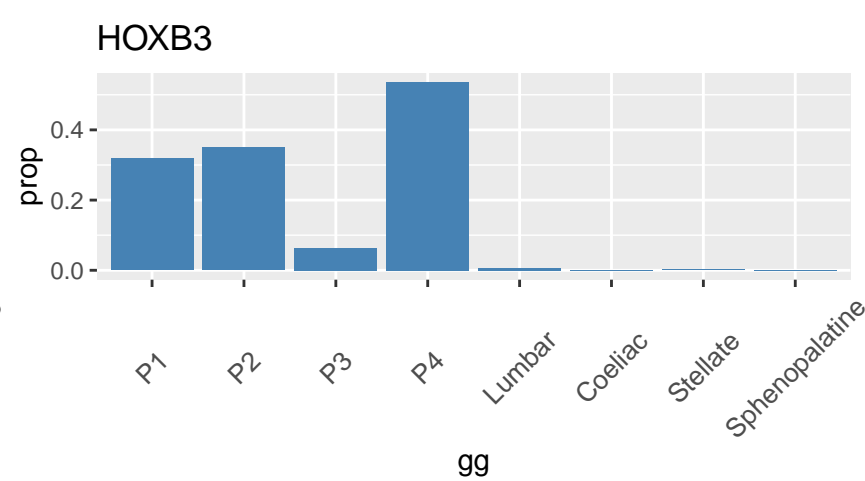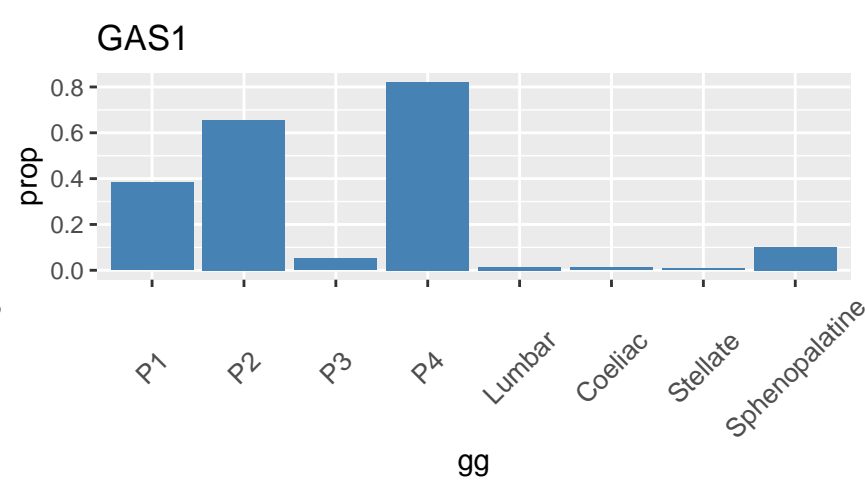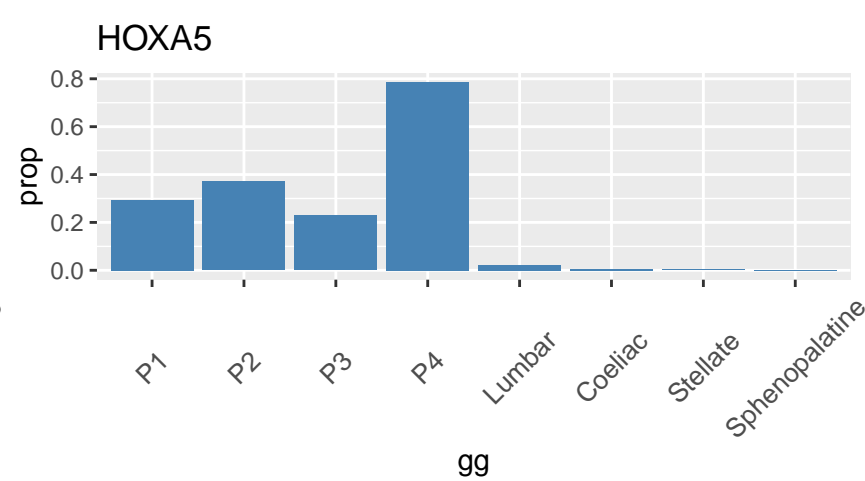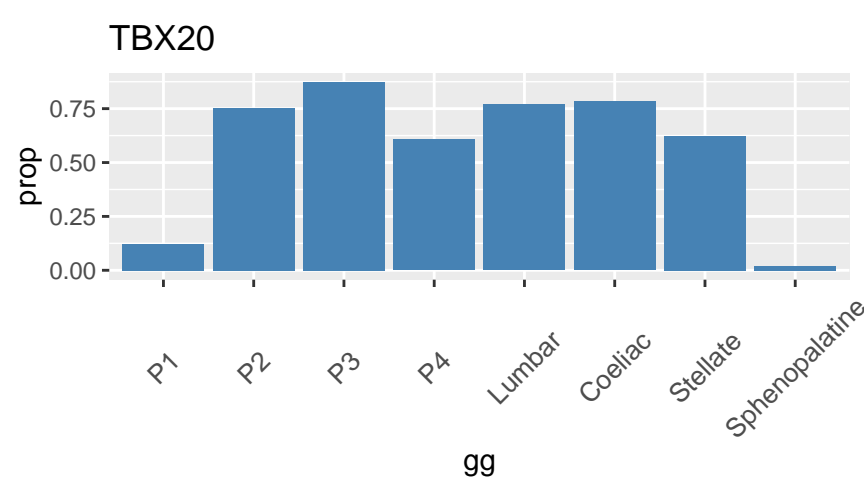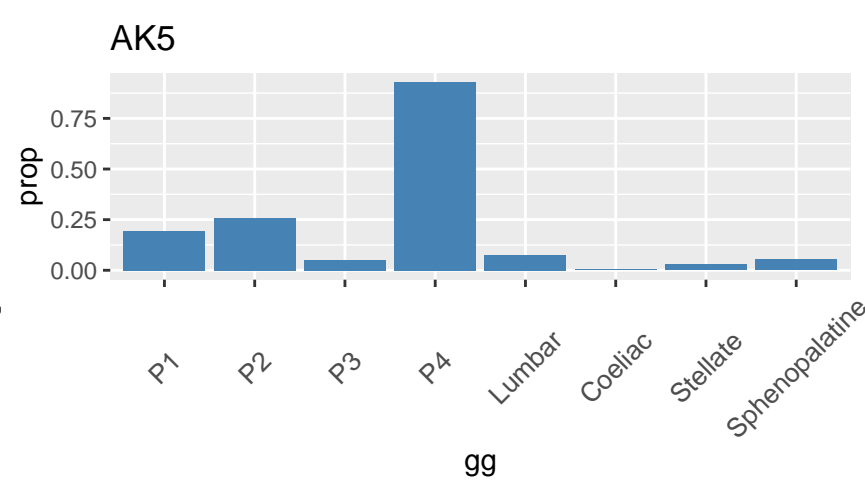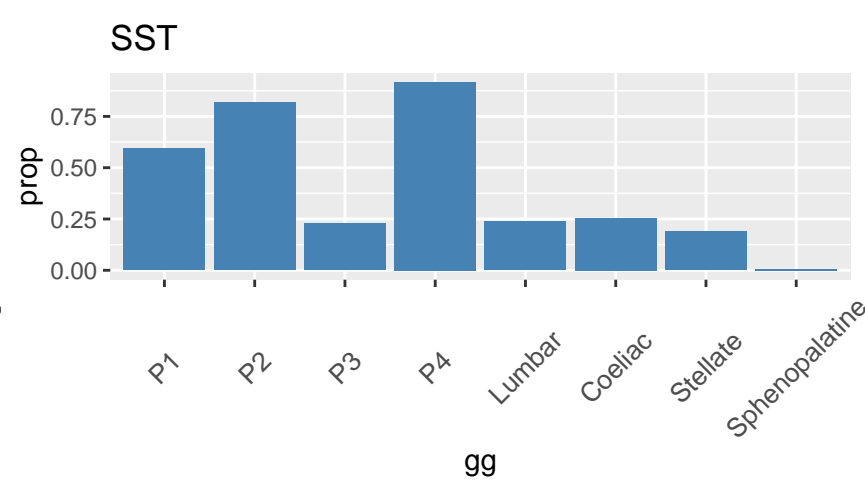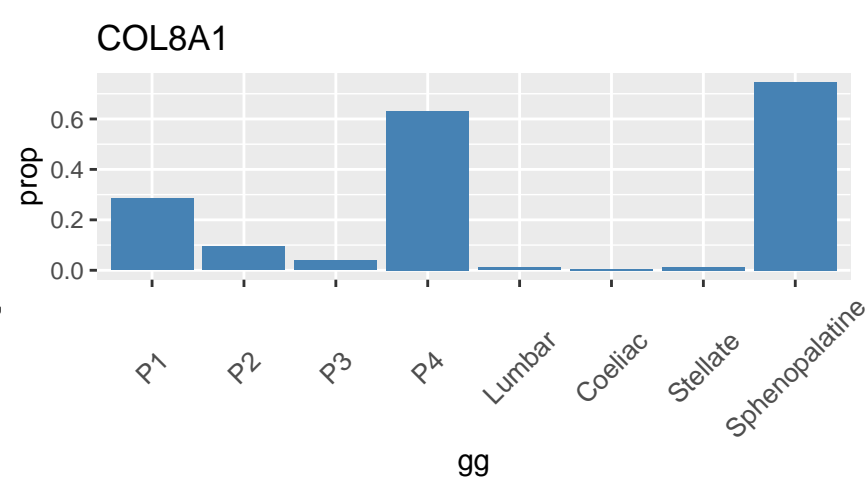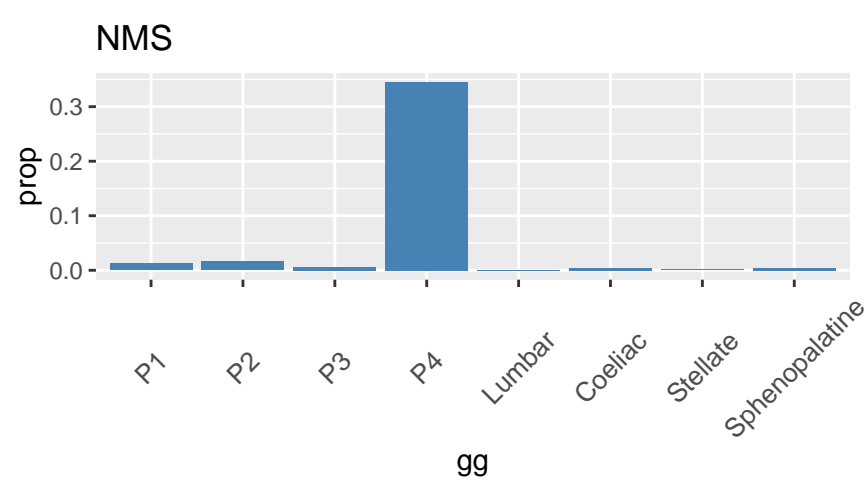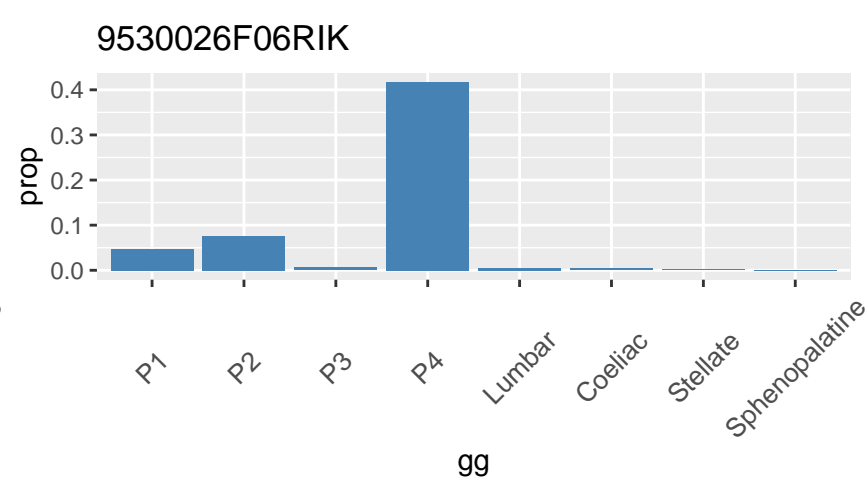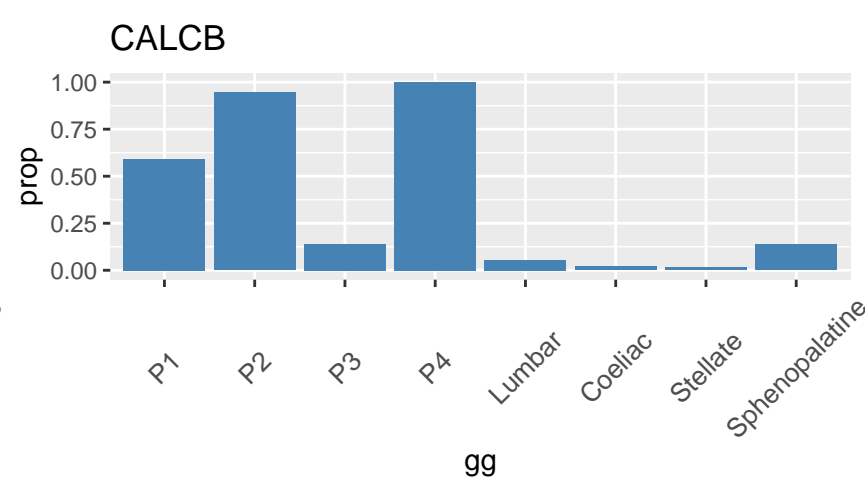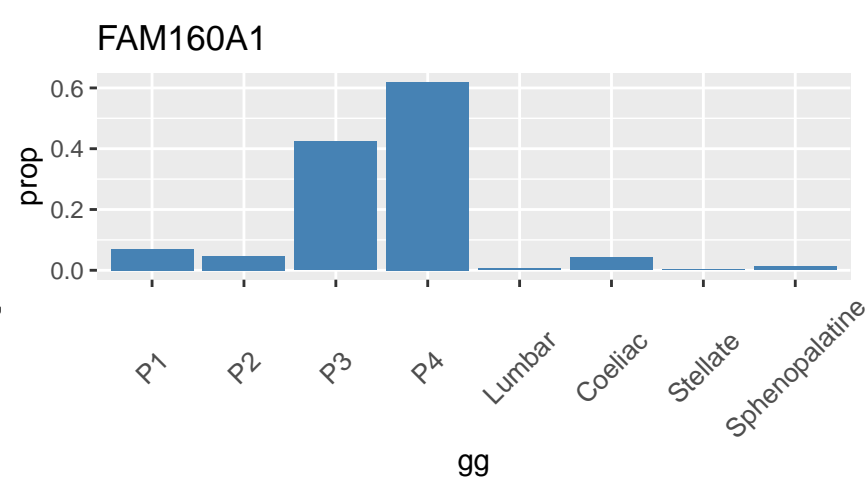

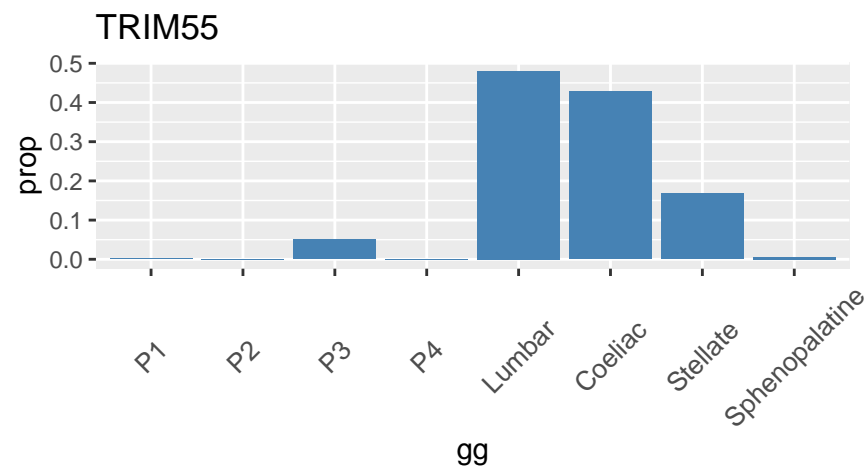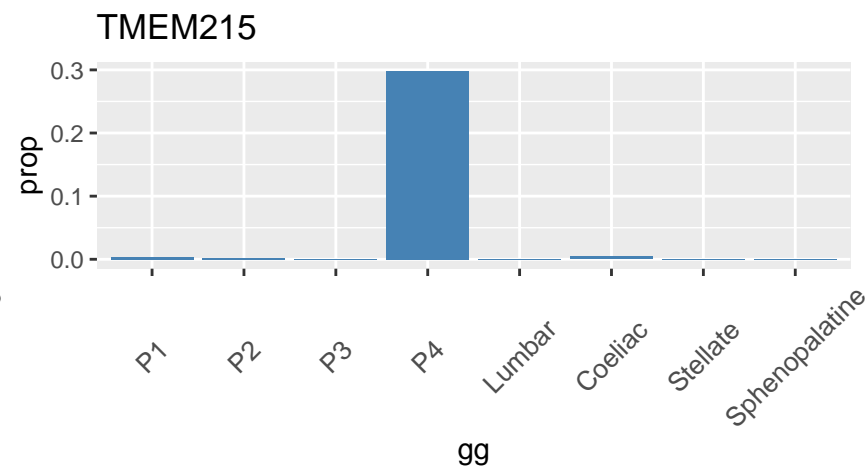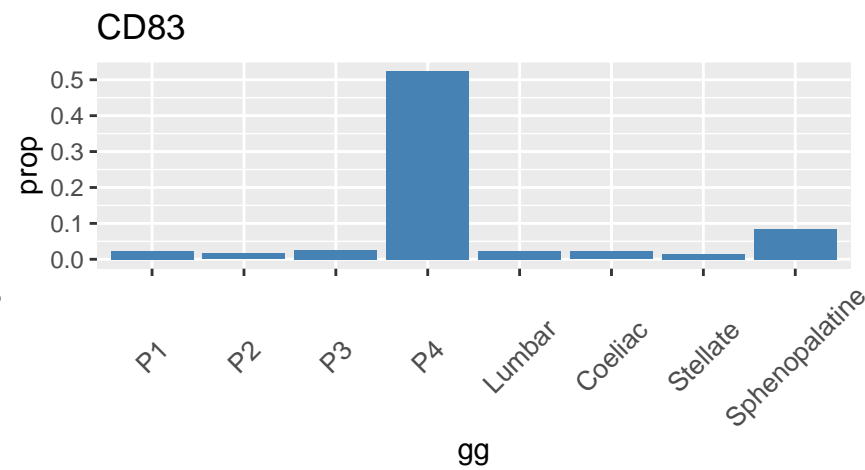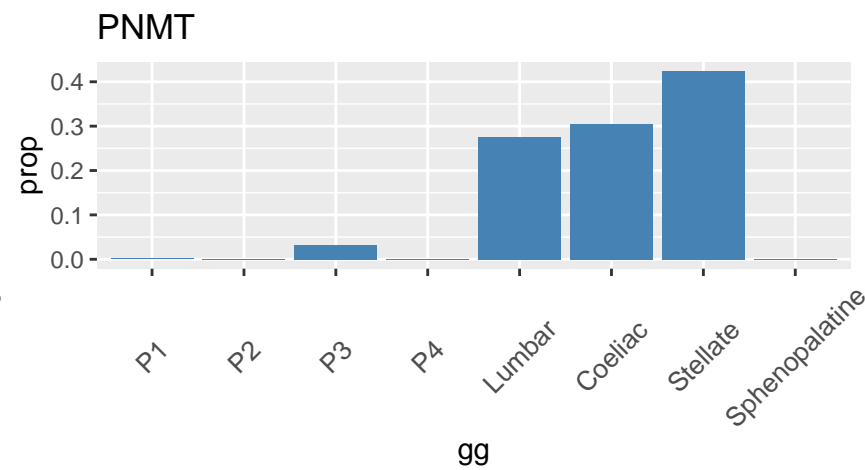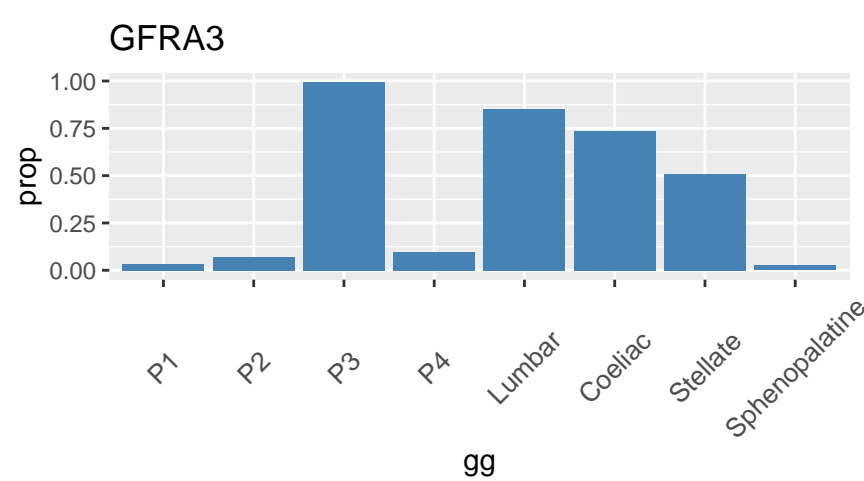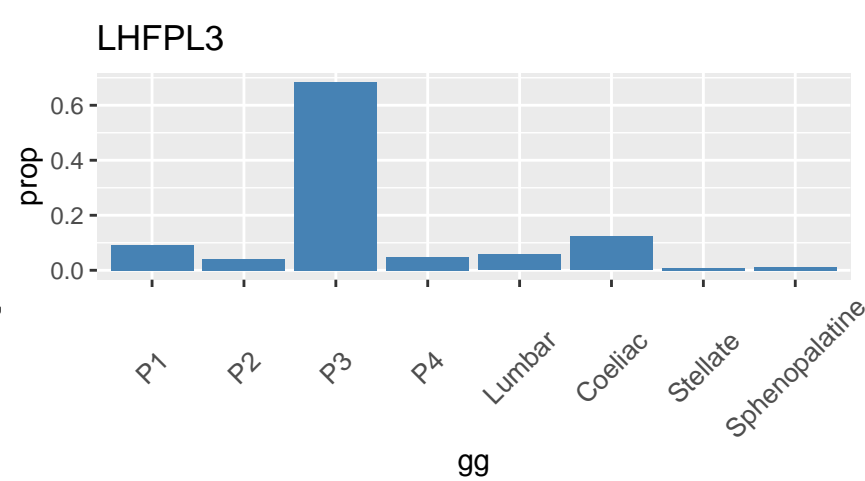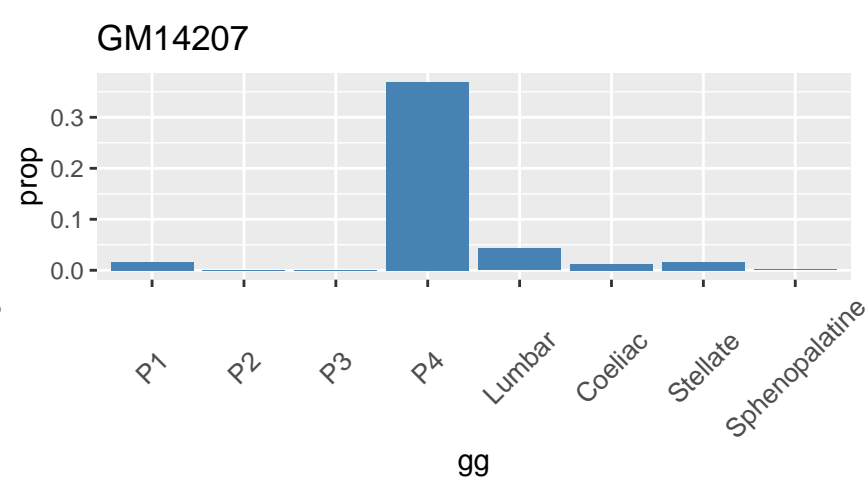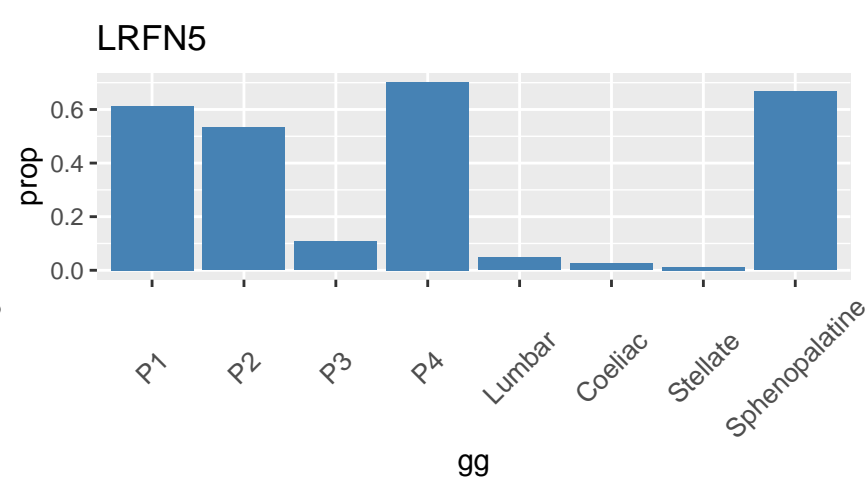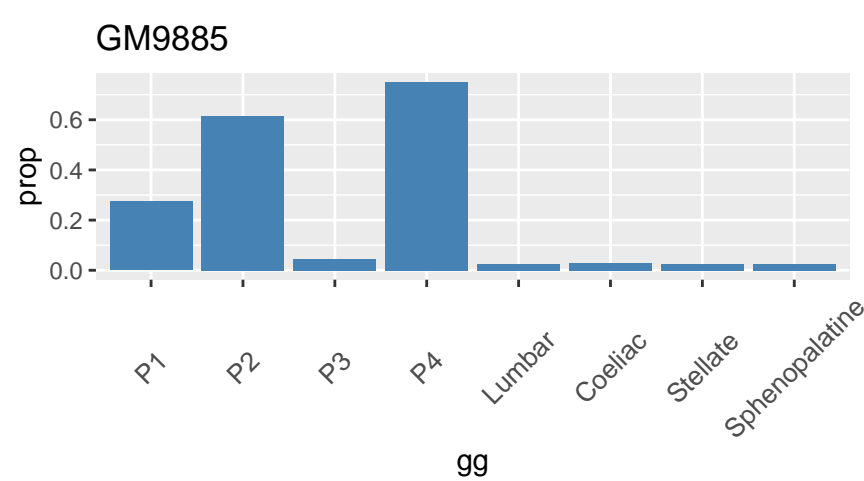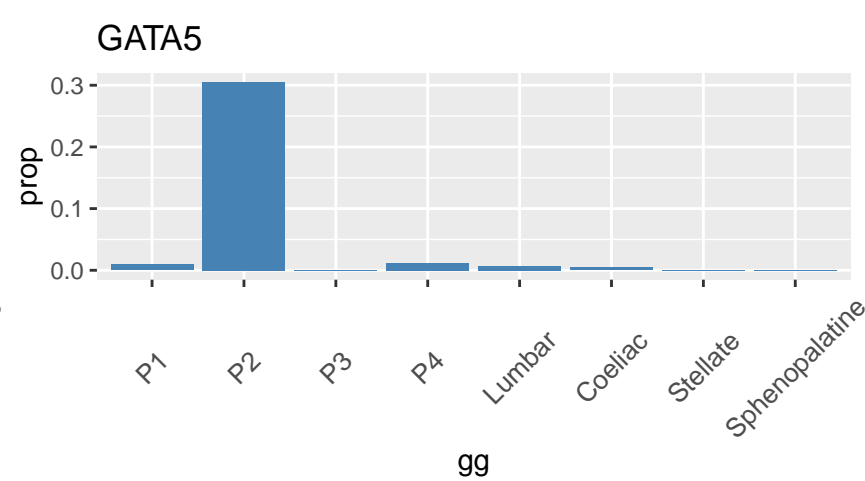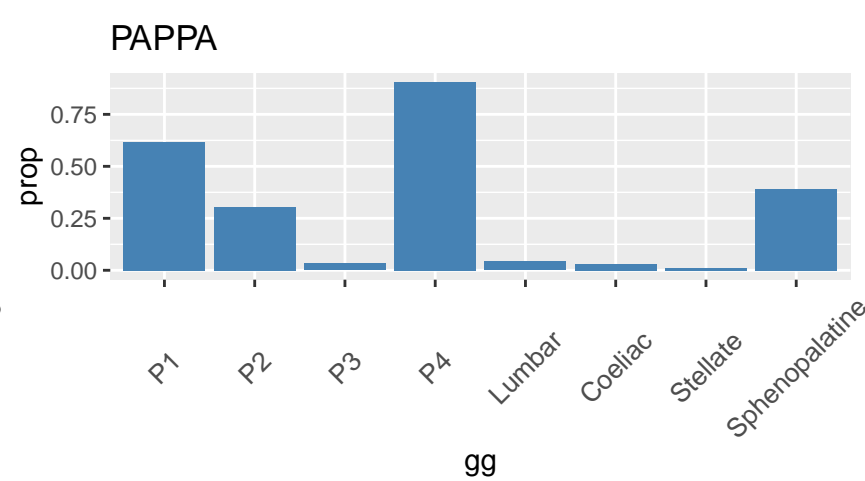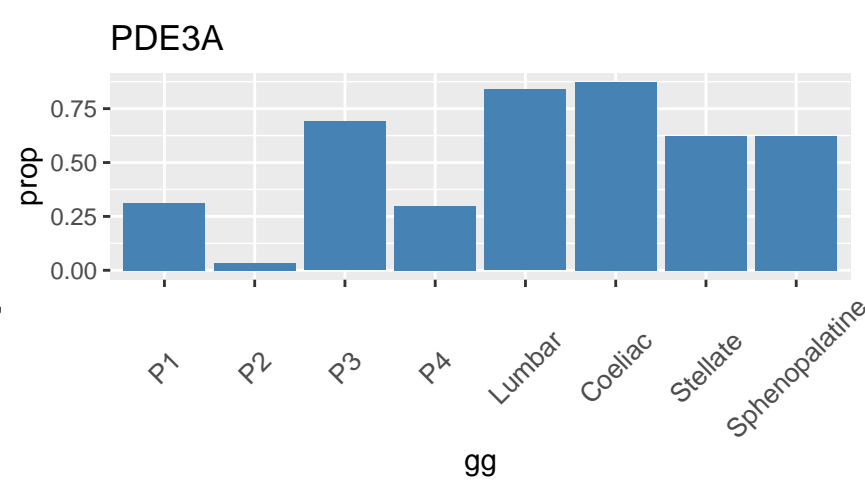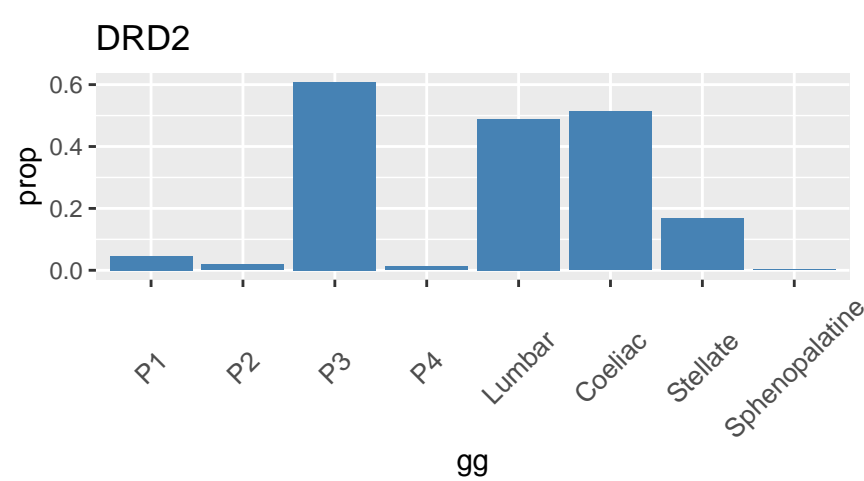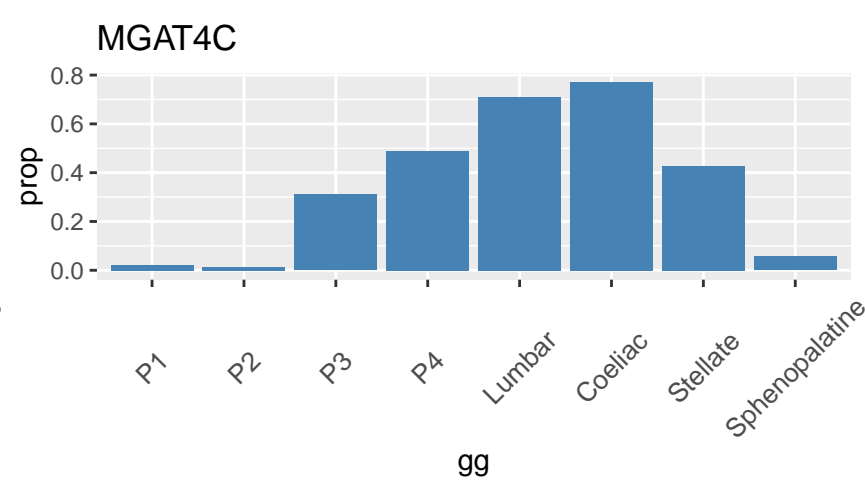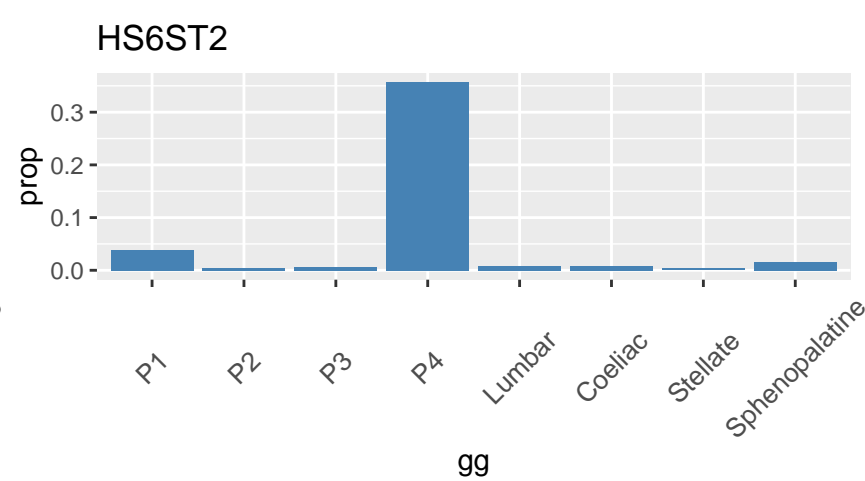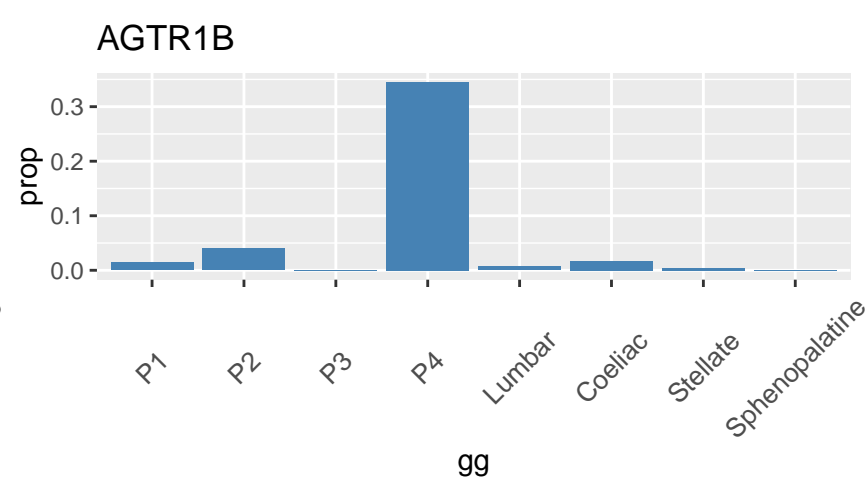

PIP5K1B

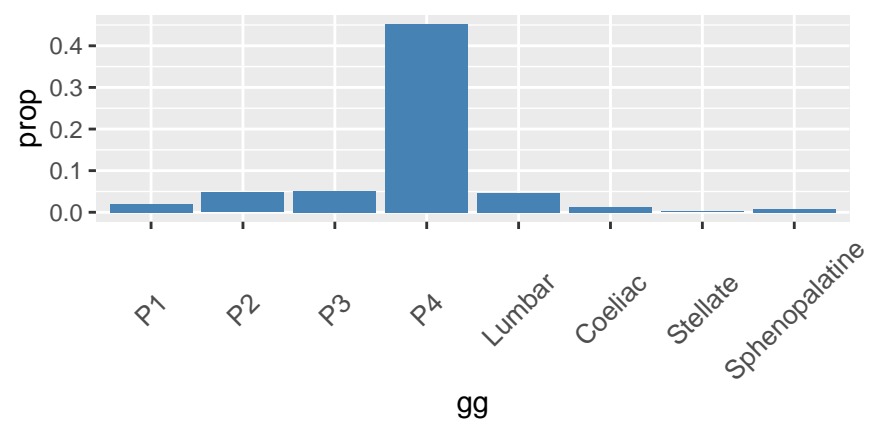

PCDH8

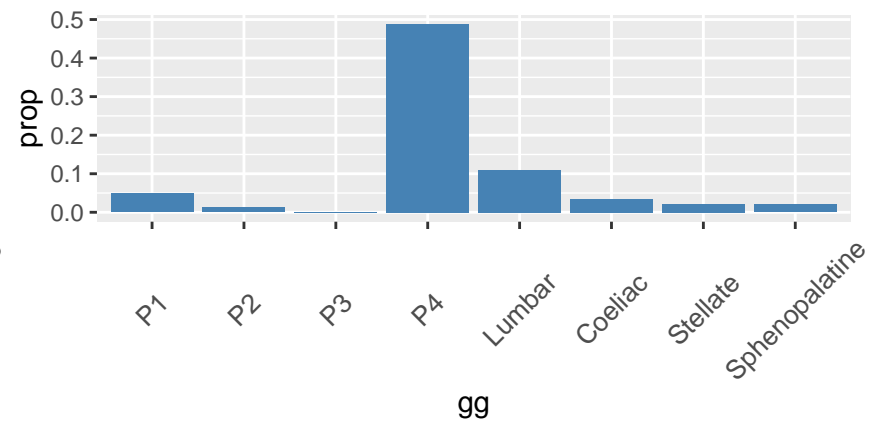

2610028E06RIK

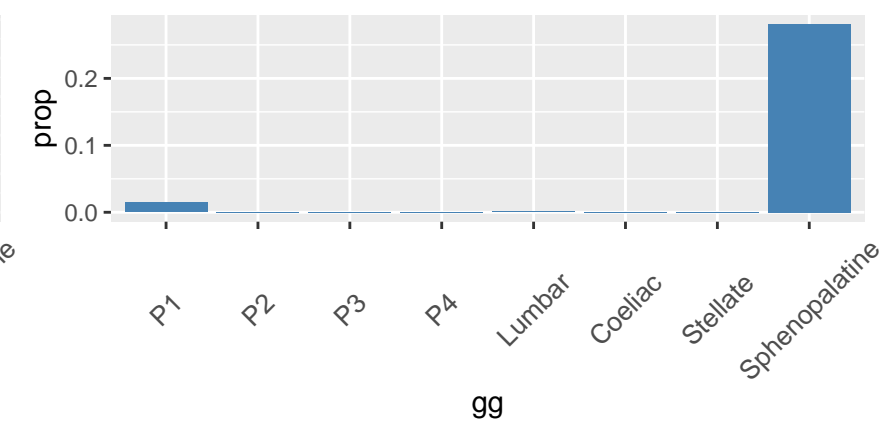

VIP

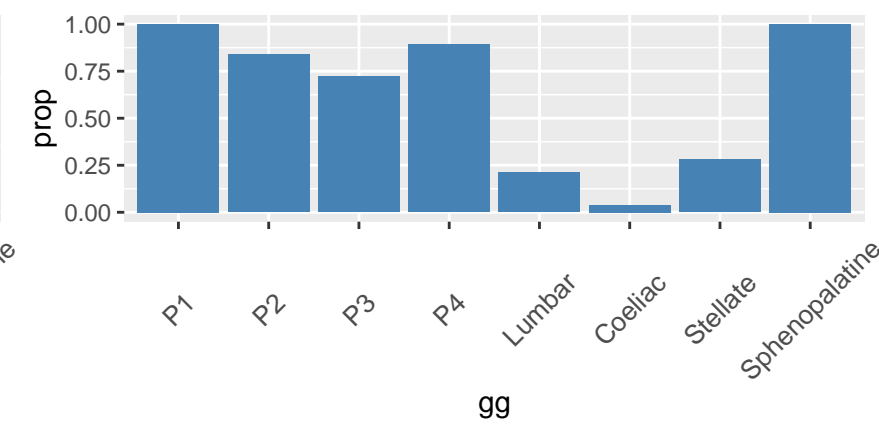

Supplement: supp3 [file elife-91576-supp3-v1.pdf]
