# Supplementary material for: The pelvic organs receive no parasympathetic innervation
Source: eLife. 2024 Mar 15;12:RP91576. doi: 10.7554/eLife.91576 (PMC10942786; doi:10.7554/eLife.91576)
Supplement: Supplementary file 1. — Each row in the table indicates the gene name, the score, a description of the dichotomization (under the field ‘group.compar.string’, in the format {subset_1}vs{subset_2}), and each ganglion or pelvic cluster, marked with 1 or 0 to indicate that the cluster belongs, respectively, to subset_1 or subset_2. [file elife-91576-supp1.xlsx]

## Sheet: top_combinatorial_genes_6gg_all
gene	score	group.compar.string	P1	P2	P3	P4	Lumbar	Coeliac	Stellate	Sphenopalatine
ISL1	5.36	P1_P2_P3_P4_Lumbar_Coeliac_Stellate_VS_Sphenopalatine	1	1	1	1	1	1	1	0
HAND1	5.29	P1_P2_P3_P4_Lumbar_Coeliac_Stellate_VS_Sphenopalatine	1	1	1	1	1	1	1	0
HOXC10	5.16	P1_P2_P3_P4_Lumbar_VS_Coeliac_Stellate_Sphenopalatine	1	1	1	1	1	0	0	0
GATA3	5.11	P1_P2_P3_P4_Lumbar_Coeliac_Stellate_VS_Sphenopalatine	1	1	1	1	1	1	1	0
HOXC9	4.87	P1_P2_P3_P4_Lumbar_Coeliac_Stellate_VS_Sphenopalatine	1	1	1	1	1	1	1	0
HOXC8	4.87	P1_P2_P3_P4_Lumbar_Coeliac_Stellate_VS_Sphenopalatine	1	1	1	1	1	1	1	0
GALR1	4.82	Sphenopalatine_VS_P1_P2_P3_P4_Lumbar_Coeliac_Stellate	0	0	0	0	0	0	0	1
HOXD3OS1	4.77	P1_P2_P3_P4_Lumbar_Coeliac_Stellate_VS_Sphenopalatine	1	1	1	1	1	1	1	0
PRR16	4.59	P4_VS_P1_P2_P3_Lumbar_Coeliac_Stellate_Sphenopalatine	0	0	0	1	0	0	0	0
HOXC6	4.59	P1_P2_P3_P4_Lumbar_Coeliac_Stellate_VS_Sphenopalatine	1	1	1	1	1	1	1	0
GATA2	4.58	P1_P2_P3_P4_Lumbar_Coeliac_Stellate_VS_Sphenopalatine	1	1	1	1	1	1	1	0
HOXC4	4.54	P1_P2_P3_P4_Lumbar_Coeliac_Stellate_VS_Sphenopalatine	1	1	1	1	1	1	1	0
NTN1	4.52	Sphenopalatine_VS_P1_P2_P3_P4_Lumbar_Coeliac_Stellate	0	0	0	0	0	0	0	1
HOXD10	4.5	P1_P2_P4_VS_P3_Lumbar_Coeliac_Stellate_Sphenopalatine	1	1	0	1	0	0	0	0
HMX2	4.3	Sphenopalatine_VS_P1_P2_P3_P4_Lumbar_Coeliac_Stellate	0	0	0	0	0	0	0	1
DLX6	4.29	Sphenopalatine_VS_P1_P2_P3_P4_Lumbar_Coeliac_Stellate	0	0	0	0	0	0	0	1
ALDH1A2	4.28	P4_VS_P1_P2_P3_Lumbar_Coeliac_Stellate_Sphenopalatine	0	0	0	1	0	0	0	0
CHAT	4.17	P1_P2_P4_Sphenopalatine_VS_P3_Lumbar_Coeliac_Stellate	1	1	0	1	0	0	0	1
HMX1	4.15	P1_P2_P4_Lumbar_Coeliac_Stellate_VS_P3_Sphenopalatine	1	1	0	1	1	1	1	0
EBF3	4.13	Sphenopalatine_VS_P1_P2_P3_P4_Lumbar_Coeliac_Stellate	0	0	0	0	0	0	0	1
HOXD9	4.12	P1_P2_P3_P4_VS_Lumbar_Coeliac_Stellate_Sphenopalatine	1	1	1	1	0	0	0	0
HOXA7	4.1	P1_P2_P3_P4_Lumbar_VS_Coeliac_Stellate_Sphenopalatine	1	1	1	1	1	0	0	0
MUCL1	4.06	P4_VS_P1_P2_P3_Lumbar_Coeliac_Stellate_Sphenopalatine	0	0	0	1	0	0	0	0
HOXA9	4.04	P1_P2_P3_P4_Lumbar_VS_Coeliac_Stellate_Sphenopalatine	1	1	1	1	1	0	0	0
SYT6	4.04	Sphenopalatine_VS_P1_P2_P3_P4_Lumbar_Coeliac_Stellate	0	0	0	0	0	0	0	1
MUCL2	3.99	P4_VS_P1_P2_P3_Lumbar_Coeliac_Stellate_Sphenopalatine	0	0	0	1	0	0	0	0
PGM5	3.99	P4_VS_P1_P2_P3_Lumbar_Coeliac_Stellate_Sphenopalatine	0	0	0	1	0	0	0	0
NCCRP1	3.99	P2_P4_VS_P1_P3_Lumbar_Coeliac_Stellate_Sphenopalatine	0	1	0	1	0	0	0	0
CACNG3	3.98	P1_P2_P3_Lumbar_Coeliac_Stellate_Sphenopalatine_VS_P4	1	1	1	0	1	1	1	1
INSM2	3.96	P3_Lumbar_Coeliac_Stellate_VS_P1_P2_P4_Sphenopalatine	0	0	1	0	1	1	1	0
PTGDR	3.93	Sphenopalatine_VS_P1_P2_P3_P4_Lumbar_Coeliac_Stellate	0	0	0	0	0	0	0	1
MECOM	3.92	P3_VS_P1_P2_P4_Lumbar_Coeliac_Stellate_Sphenopalatine	0	0	1	0	0	0	0	0
GM43066	3.9	Sphenopalatine_VS_P1_P2_P3_P4_Lumbar_Coeliac_Stellate	0	0	0	0	0	0	0	1
ZFPM2	3.89	P3_Lumbar_Coeliac_Stellate_VS_P1_P2_P4_Sphenopalatine	0	0	1	0	1	1	1	0
9130024F11RIK	3.88	Sphenopalatine_VS_P1_P2_P3_P4_Lumbar_Coeliac_Stellate	0	0	0	0	0	0	0	1
HOXA10	3.87	P1_P2_P3_P4_VS_Lumbar_Coeliac_Stellate_Sphenopalatine	1	1	1	1	0	0	0	0
HOXC11	3.85	P1_P2_P4_VS_P3_Lumbar_Coeliac_Stellate_Sphenopalatine	1	1	0	1	0	0	0	0
HOXD4	3.84	P1_P2_P3_P4_Lumbar_Coeliac_Stellate_VS_Sphenopalatine	1	1	1	1	1	1	1	0
NELL1	3.82	P1_P2_P4_Sphenopalatine_VS_P3_Lumbar_Coeliac_Stellate	1	1	0	1	0	0	0	1
TAC2	3.76	Sphenopalatine_VS_P1_P2_P3_P4_Lumbar_Coeliac_Stellate	0	0	0	0	0	0	0	1
SHISA9	3.73	P1_P2_P3_P4_Lumbar_Coeliac_Stellate_VS_Sphenopalatine	1	1	1	1	1	1	1	0
BMPR1B	3.72	Lumbar_Coeliac_Stellate_VS_P1_P2_P3_P4_Sphenopalatine	0	0	0	0	1	1	1	0
DLX5	3.69	Sphenopalatine_VS_P1_P2_P3_P4_Lumbar_Coeliac_Stellate	0	0	0	0	0	0	0	1
MINAR1	3.65	P4_VS_P1_P2_P3_Lumbar_Coeliac_Stellate_Sphenopalatine	0	0	0	1	0	0	0	0
GPR149	3.64	P3_VS_P1_P2_P4_Lumbar_Coeliac_Stellate_Sphenopalatine	0	0	1	0	0	0	0	0
SCTR	3.64	Lumbar_Coeliac_Stellate_VS_P1_P2_P3_P4_Sphenopalatine	0	0	0	0	1	1	1	0
CPB1	3.61	P4_VS_P1_P2_P3_Lumbar_Coeliac_Stellate_Sphenopalatine	0	0	0	1	0	0	0	0
CDH3	3.6	P4_VS_P1_P2_P3_Lumbar_Coeliac_Stellate_Sphenopalatine	0	0	0	1	0	0	0	0
TAC1	3.6	Sphenopalatine_VS_P1_P2_P3_P4_Lumbar_Coeliac_Stellate	0	0	0	0	0	0	0	1
HMX3	3.59	Sphenopalatine_VS_P1_P2_P3_P4_Lumbar_Coeliac_Stellate	0	0	0	0	0	0	0	1
TFAP2B	3.58	P3_Lumbar_Coeliac_Stellate_VS_P1_P2_P4_Sphenopalatine	0	0	1	0	1	1	1	0
NTRK1	3.56	P3_Lumbar_Coeliac_Stellate_VS_P1_P2_P4_Sphenopalatine	0	0	1	0	1	1	1	0
RASGRP1	3.5	Lumbar_Coeliac_Stellate_VS_P1_P2_P3_P4_Sphenopalatine	0	0	0	0	1	1	1	0
PAMR1	3.49	P2_VS_P1_P3_P4_Lumbar_Coeliac_Stellate_Sphenopalatine	0	1	0	0	0	0	0	0
INSRR	3.49	P3_Lumbar_Coeliac_Stellate_VS_P1_P2_P4_Sphenopalatine	0	0	1	0	1	1	1	0
SLC35D3	3.48	P2_P3_VS_P1_P4_Lumbar_Coeliac_Stellate_Sphenopalatine	0	1	1	0	0	0	0	0
KLHL1	3.48	P1_P2_P3_P4_VS_Lumbar_Coeliac_Stellate_Sphenopalatine	1	1	1	1	0	0	0	0
GM2990	3.47	P1_P2_P4_Sphenopalatine_VS_P3_Lumbar_Coeliac_Stellate	1	1	0	1	0	0	0	1
CAMP	3.44	P4_VS_P1_P2_P3_Lumbar_Coeliac_Stellate_Sphenopalatine	0	0	0	1	0	0	0	0
SATB2	3.44	Sphenopalatine_VS_P1_P2_P3_P4_Lumbar_Coeliac_Stellate	0	0	0	0	0	0	0	1
TH	3.43	P3_Lumbar_Coeliac_Stellate_VS_P1_P2_P4_Sphenopalatine	0	0	1	0	1	1	1	0
GRP	3.41	P2_VS_P1_P3_P4_Lumbar_Coeliac_Stellate_Sphenopalatine	0	1	0	0	0	0	0	0
ADAMTSL1	3.41	Sphenopalatine_VS_P1_P2_P3_P4_Lumbar_Coeliac_Stellate	0	0	0	0	0	0	0	1
BNC2	3.39	P1_P4_Sphenopalatine_VS_P2_P3_Lumbar_Coeliac_Stellate	1	0	0	1	0	0	0	1
TACR3	3.38	P4_VS_P1_P2_P3_Lumbar_Coeliac_Stellate_Sphenopalatine	0	0	0	1	0	0	0	0
C1QL2	3.37	P1_Sphenopalatine_VS_P2_P3_P4_Lumbar_Coeliac_Stellate	1	0	0	0	0	0	0	1
GM36684	3.35	P1_P2_P3_P4_Stellate_Sphenopalatine_VS_Lumbar_Coeliac	1	1	1	1	0	0	1	1
ISLR2	3.35	P1_P2_P3_Lumbar_Coeliac_Stellate_Sphenopalatine_VS_P4	1	1	1	0	1	1	1	1
GM30648	3.33	P1_P2_P3_P4_Lumbar_Coeliac_Stellate_VS_Sphenopalatine	1	1	1	1	1	1	1	0
HOXB3	3.32	P1_P2_P4_VS_P3_Lumbar_Coeliac_Stellate_Sphenopalatine	1	1	0	1	0	0	0	0
GAS1	3.32	P1_P2_P4_VS_P3_Lumbar_Coeliac_Stellate_Sphenopalatine	1	1	0	1	0	0	0	0
HOXA5	3.3	P1_P2_P3_P4_VS_Lumbar_Coeliac_Stellate_Sphenopalatine	1	1	1	1	0	0	0	0
TBX20	3.29	P1_P2_P3_P4_Lumbar_Coeliac_Stellate_VS_Sphenopalatine	1	1	1	1	1	1	1	0
AK5	3.27	P4_VS_P1_P2_P3_Lumbar_Coeliac_Stellate_Sphenopalatine	0	0	0	1	0	0	0	0
SST	3.27	P1_P2_P3_P4_Lumbar_Coeliac_Stellate_VS_Sphenopalatine	1	1	1	1	1	1	1	0
COL8A1	3.27	P4_Sphenopalatine_VS_P1_P2_P3_Lumbar_Coeliac_Stellate	0	0	0	1	0	0	0	1
NMS	3.25	P4_VS_P1_P2_P3_Lumbar_Coeliac_Stellate_Sphenopalatine	0	0	0	1	0	0	0	0
9530026F06RIK	3.24	P4_VS_P1_P2_P3_Lumbar_Coeliac_Stellate_Sphenopalatine	0	0	0	1	0	0	0	0
CALCB	3.22	P1_P2_P4_VS_P3_Lumbar_Coeliac_Stellate_Sphenopalatine	1	1	0	1	0	0	0	0
FAM160A1	3.22	P3_P4_VS_P1_P2_Lumbar_Coeliac_Stellate_Sphenopalatine	0	0	1	1	0	0	0	0
TRIM55	3.22	Lumbar_Coeliac_VS_P1_P2_P3_P4_Stellate_Sphenopalatine	0	0	0	0	1	1	0	0
TMEM215	3.2	P4_VS_P1_P2_P3_Lumbar_Coeliac_Stellate_Sphenopalatine	0	0	0	1	0	0	0	0
CD83	3.19	P4_VS_P1_P2_P3_Lumbar_Coeliac_Stellate_Sphenopalatine	0	0	0	1	0	0	0	0
PNMT	3.19	Lumbar_Coeliac_Stellate_VS_P1_P2_P3_P4_Sphenopalatine	0	0	0	0	1	1	1	0
GFRA3	3.19	P3_Lumbar_Coeliac_Stellate_VS_P1_P2_P4_Sphenopalatine	0	0	1	0	1	1	1	0
LHFPL3	3.18	P3_VS_P1_P2_P4_Lumbar_Coeliac_Stellate_Sphenopalatine	0	0	1	0	0	0	0	0
GM14207	3.15	P4_VS_P1_P2_P3_Lumbar_Coeliac_Stellate_Sphenopalatine	0	0	0	1	0	0	0	0
LRFN5	3.14	P1_P2_P4_Sphenopalatine_VS_P3_Lumbar_Coeliac_Stellate	1	1	0	1	0	0	0	1
GM9885	3.11	P2_P4_VS_P1_P3_Lumbar_Coeliac_Stellate_Sphenopalatine	0	1	0	1	0	0	0	0
GATA5	3.09	P2_VS_P1_P3_P4_Lumbar_Coeliac_Stellate_Sphenopalatine	0	1	0	0	0	0	0	0
PAPPA	3.09	P1_P2_P4_Sphenopalatine_VS_P3_Lumbar_Coeliac_Stellate	1	1	0	1	0	0	0	1
PDE3A	3.09	P1_P3_P4_Lumbar_Coeliac_Stellate_Sphenopalatine_VS_P2	1	0	1	1	1	1	1	1
DRD2	3.08	P3_Lumbar_Coeliac_VS_P1_P2_P4_Stellate_Sphenopalatine	0	0	1	0	1	1	0	0
MGAT4C	3.08	P3_P4_Lumbar_Coeliac_Stellate_VS_P1_P2_Sphenopalatine	0	0	1	1	1	1	1	0
HS6ST2	3.07	P4_VS_P1_P2_P3_Lumbar_Coeliac_Stellate_Sphenopalatine	0	0	0	1	0	0	0	0
AGTR1B	3.06	P4_VS_P1_P2_P3_Lumbar_Coeliac_Stellate_Sphenopalatine	0	0	0	1	0	0	0	0
PIP5K1B	3.06	P4_VS_P1_P2_P3_Lumbar_Coeliac_Stellate_Sphenopalatine	0	0	0	1	0	0	0	0
PCDH8	3.05	P4_VS_P1_P2_P3_Lumbar_Coeliac_Stellate_Sphenopalatine	0	0	0	1	0	0	0	0
2610028E06RIK	3.05	Sphenopalatine_VS_P1_P2_P3_P4_Lumbar_Coeliac_Stellate	0	0	0	0	0	0	0	1
VIP	3.05	P1_P2_P3_P4_Lumbar_Stellate_Sphenopalatine_VS_Coeliac	1	1	1	1	1	0	1	1
CDH4	3.04	P3_VS_P1_P2_P4_Lumbar_Coeliac_Stellate_Sphenopalatine	0	0	1	0	0	0	0	0
HOTAIRM1	3.04	P4_VS_P1_P2_P3_Lumbar_Coeliac_Stellate_Sphenopalatine	0	0	0	1	0	0	0	0
RAI14	3.03	P4_VS_P1_P2_P3_Lumbar_Coeliac_Stellate_Sphenopalatine	0	0	0	1	0	0	0	0
PYY	3.03	Sphenopalatine_VS_P1_P2_P3_P4_Lumbar_Coeliac_Stellate	0	0	0	0	0	0	0	1
2900079G21RIK	3.02	Sphenopalatine_VS_P1_P2_P3_P4_Lumbar_Coeliac_Stellate	0	0	0	0	0	0	0	1
GNA14	3.01	P3_VS_P1_P2_P4_Lumbar_Coeliac_Stellate_Sphenopalatine	0	0	1	0	0	0	0	0
HCRTR2	3.01	P4_VS_P1_P2_P3_Lumbar_Coeliac_Stellate_Sphenopalatine	0	0	0	1	0	0	0	0
PALMD	3	P1_P2_P3_Lumbar_Coeliac_Stellate_Sphenopalatine_VS_P4	1	1	1	0	1	1	1	1
AA387883	2.99	P4_VS_P1_P2_P3_Lumbar_Coeliac_Stellate_Sphenopalatine	0	0	0	1	0	0	0	0
KCNIP4	2.97	P1_P4_Lumbar_Coeliac_Stellate_Sphenopalatine_VS_P2_P3	1	0	0	1	1	1	1	1
CTXN3	2.95	P4_VS_P1_P2_P3_Lumbar_Coeliac_Stellate_Sphenopalatine	0	0	0	1	0	0	0	0
SOX9	2.94	P4_VS_P1_P2_P3_Lumbar_Coeliac_Stellate_Sphenopalatine	0	0	0	1	0	0	0	0
CALCA	2.93	P4_VS_P1_P2_P3_Lumbar_Coeliac_Stellate_Sphenopalatine	0	0	0	1	0	0	0	0
CD79A	2.92	P3_VS_P1_P2_P4_Lumbar_Coeliac_Stellate_Sphenopalatine	0	0	1	0	0	0	0	0
CYP26B1	2.92	P4_VS_P1_P2_P3_Lumbar_Coeliac_Stellate_Sphenopalatine	0	0	0	1	0	0	0	0
TNFSF13B	2.92	P4_VS_P1_P2_P3_Lumbar_Coeliac_Stellate_Sphenopalatine	0	0	0	1	0	0	0	0
TAFA1	2.92	P1_P2_P3_P4_Sphenopalatine_VS_Lumbar_Coeliac_Stellate	1	1	1	1	0	0	0	1
GRIN2C	2.91	P2_VS_P1_P3_P4_Lumbar_Coeliac_Stellate_Sphenopalatine	0	1	0	0	0	0	0	0
HOXD11	2.91	P4_VS_P1_P2_P3_Lumbar_Coeliac_Stellate_Sphenopalatine	0	0	0	1	0	0	0	0
PDE1A	2.91	P4_VS_P1_P2_P3_Lumbar_Coeliac_Stellate_Sphenopalatine	0	0	0	1	0	0	0	0
NDST4	2.91	P1_P4_VS_P2_P3_Lumbar_Coeliac_Stellate_Sphenopalatine	1	0	0	1	0	0	0	0
ST6GALNAC5	2.91	P1_P4_Lumbar_Coeliac_Stellate_Sphenopalatine_VS_P2_P3	1	0	0	1	1	1	1	1
PARD3B	2.9	P2_P4_VS_P1_P3_Lumbar_Coeliac_Stellate_Sphenopalatine	0	1	0	1	0	0	0	0
HOXB7	2.9	P1_P2_P4_VS_P3_Lumbar_Coeliac_Stellate_Sphenopalatine	1	1	0	1	0	0	0	0
RSPO2	2.9	P1_P4_Sphenopalatine_VS_P2_P3_Lumbar_Coeliac_Stellate	1	0	0	1	0	0	0	1
RBFOX3	2.9	P1_P2_P3_P4_Sphenopalatine_VS_Lumbar_Coeliac_Stellate	1	1	1	1	0	0	0	1
GALNT18	2.89	P2_VS_P1_P3_P4_Lumbar_Coeliac_Stellate_Sphenopalatine	0	1	0	0	0	0	0	0
RGMA	2.89	P4_VS_P1_P2_P3_Lumbar_Coeliac_Stellate_Sphenopalatine	0	0	0	1	0	0	0	0
ECEL1	2.89	P1_P2_P3_P4_Lumbar_Coeliac_Stellate_VS_Sphenopalatine	1	1	1	1	1	1	1	0
GLT28D2	2.88	P3_P4_VS_P1_P2_Lumbar_Coeliac_Stellate_Sphenopalatine	0	0	1	1	0	0	0	0
CDH13	2.88	Sphenopalatine_VS_P1_P2_P3_P4_Lumbar_Coeliac_Stellate	0	0	0	0	0	0	0	1
CHST1	2.87	P2_P3_P4_Lumbar_Coeliac_Stellate_VS_P1_Sphenopalatine	0	1	1	1	1	1	1	0
TLX3	2.86	P3_VS_P1_P2_P4_Lumbar_Coeliac_Stellate_Sphenopalatine	0	0	1	0	0	0	0	0
HOXD8	2.86	P1_P2_P3_P4_Lumbar_Coeliac_Stellate_VS_Sphenopalatine	1	1	1	1	1	1	1	0
UGT8A	2.83	P4_VS_P1_P2_P3_Lumbar_Coeliac_Stellate_Sphenopalatine	0	0	0	1	0	0	0	0
SOX6	2.82	Coeliac_VS_P1_P2_P3_P4_Lumbar_Stellate_Sphenopalatine	0	0	0	0	0	1	0	0
ADRA2C	2.82	P1_P2_P3_P4_Lumbar_Coeliac_Stellate_VS_Sphenopalatine	1	1	1	1	1	1	1	0
ERICH2	2.81	P4_VS_P1_P2_P3_Lumbar_Coeliac_Stellate_Sphenopalatine	0	0	0	1	0	0	0	0
SLC16A12	2.8	P4_VS_P1_P2_P3_Lumbar_Coeliac_Stellate_Sphenopalatine	0	0	0	1	0	0	0	0
VSTM2A	2.8	Sphenopalatine_VS_P1_P2_P3_P4_Lumbar_Coeliac_Stellate	0	0	0	0	0	0	0	1
SLC6A2	2.8	P3_Lumbar_Coeliac_Stellate_Sphenopalatine_VS_P1_P2_P4	0	0	1	0	1	1	1	1
LMO7	2.79	P3_VS_P1_P2_P4_Lumbar_Coeliac_Stellate_Sphenopalatine	0	0	1	0	0	0	0	0
GABRG3	2.79	P1_Sphenopalatine_VS_P2_P3_P4_Lumbar_Coeliac_Stellate	1	0	0	0	0	0	0	1
KCNH5	2.78	P4_VS_P1_P2_P3_Lumbar_Coeliac_Stellate_Sphenopalatine	0	0	0	1	0	0	0	0
THSD4	2.78	P1_P2_P4_VS_P3_Lumbar_Coeliac_Stellate_Sphenopalatine	1	1	0	1	0	0	0	0
HTR7	2.76	P1_VS_P2_P3_P4_Lumbar_Coeliac_Stellate_Sphenopalatine	1	0	0	0	0	0	0	0
OMP	2.76	Lumbar_Coeliac_Stellate_VS_P1_P2_P3_P4_Sphenopalatine	0	0	0	0	1	1	1	0
GRM7	2.76	P1_P3_Lumbar_Coeliac_Stellate_Sphenopalatine_VS_P2_P4	1	0	1	0	1	1	1	1
IFIH1	2.75	P4_VS_P1_P2_P3_Lumbar_Coeliac_Stellate_Sphenopalatine	0	0	0	1	0	0	0	0
CADPS2	2.74	Sphenopalatine_VS_P1_P2_P3_P4_Lumbar_Coeliac_Stellate	0	0	0	0	0	0	0	1
GADL1	2.74	Sphenopalatine_VS_P1_P2_P3_P4_Lumbar_Coeliac_Stellate	0	0	0	0	0	0	0	1
PENK	2.73	Sphenopalatine_VS_P1_P2_P3_P4_Lumbar_Coeliac_Stellate	0	0	0	0	0	0	0	1
CBLN4	2.73	P1_P2_Sphenopalatine_VS_P3_P4_Lumbar_Coeliac_Stellate	1	1	0	0	0	0	0	1
PROM1	2.73	P1_Lumbar_Coeliac_Stellate_Sphenopalatine_VS_P2_P3_P4	1	0	0	0	1	1	1	1
AJAP1	2.71	P2_P4_VS_P1_P3_Lumbar_Coeliac_Stellate_Sphenopalatine	0	1	0	1	0	0	0	0
CCND1	2.71	P1_P2_P3_P4_Lumbar_Coeliac_Stellate_VS_Sphenopalatine	1	1	1	1	1	1	1	0
SYT10	2.7	P2_VS_P1_P3_P4_Lumbar_Coeliac_Stellate_Sphenopalatine	0	1	0	0	0	0	0	0
NNMT	2.7	Sphenopalatine_VS_P1_P2_P3_P4_Lumbar_Coeliac_Stellate	0	0	0	0	0	0	0	1
C1QTNF7	2.7	P1_P2_P3_P4_Lumbar_Coeliac_Sphenopalatine_VS_Stellate	1	1	1	1	1	1	0	1
GM53	2.69	P1_P2_VS_P3_P4_Lumbar_Coeliac_Stellate_Sphenopalatine	1	1	0	0	0	0	0	0
IGFBP3	2.68	P4_VS_P1_P2_P3_Lumbar_Coeliac_Stellate_Sphenopalatine	0	0	0	1	0	0	0	0
SNHG18	2.68	P4_VS_P1_P2_P3_Lumbar_Coeliac_Stellate_Sphenopalatine	0	0	0	1	0	0	0	0
MYL1	2.68	P1_P2_P3_P4_Lumbar_Coeliac_Stellate_VS_Sphenopalatine	1	1	1	1	1	1	1	0
GM8113	2.68	Sphenopalatine_VS_P1_P2_P3_P4_Lumbar_Coeliac_Stellate	0	0	0	0	0	0	0	1
COLQ	2.68	P1_P2_P4_Sphenopalatine_VS_P3_Lumbar_Coeliac_Stellate	1	1	0	1	0	0	0	1
MME	2.67	P3_VS_P1_P2_P4_Lumbar_Coeliac_Stellate_Sphenopalatine	0	0	1	0	0	0	0	0
AGTR2	2.67	P3_VS_P1_P2_P4_Lumbar_Coeliac_Stellate_Sphenopalatine	0	0	1	0	0	0	0	0
SCGN	2.67	Sphenopalatine_VS_P1_P2_P3_P4_Lumbar_Coeliac_Stellate	0	0	0	0	0	0	0	1
TNFRSF1A	2.67	P1_Sphenopalatine_VS_P2_P3_P4_Lumbar_Coeliac_Stellate	1	0	0	0	0	0	0	1
SLC18A1	2.66	P1_P2_P3_Lumbar_Coeliac_Stellate_VS_P4_Sphenopalatine	1	1	1	0	1	1	1	0
GDA	2.64	P4_Lumbar_Stellate_VS_P1_P2_P3_Coeliac_Sphenopalatine	0	0	0	1	1	0	1	0
ADAMTS2	2.64	P1_P2_Sphenopalatine_VS_P3_P4_Lumbar_Coeliac_Stellate	1	1	0	0	0	0	0	1
APOD	2.63	P4_VS_P1_P2_P3_Lumbar_Coeliac_Stellate_Sphenopalatine	0	0	0	1	0	0	0	0
HOXB2	2.63	P1_P2_P4_Sphenopalatine_VS_P3_Lumbar_Coeliac_Stellate	1	1	0	1	0	0	0	1
KIRREL3	2.63	P1_P2_P4_Lumbar_Coeliac_Stellate_Sphenopalatine_VS_P3	1	1	0	1	1	1	1	1
HOXB9	2.62	P2_VS_P1_P3_P4_Lumbar_Coeliac_Stellate_Sphenopalatine	0	1	0	0	0	0	0	0
BOC	2.62	P2_VS_P1_P3_P4_Lumbar_Coeliac_Stellate_Sphenopalatine	0	1	0	0	0	0	0	0
LAMC2	2.62	Sphenopalatine_VS_P1_P2_P3_P4_Lumbar_Coeliac_Stellate	0	0	0	0	0	0	0	1
PTHLH	2.61	Lumbar_Stellate_VS_P1_P2_P3_P4_Coeliac_Sphenopalatine	0	0	0	0	1	0	1	0
AGTR1A	2.61	P3_P4_Lumbar_Coeliac_Stellate_VS_P1_P2_Sphenopalatine	0	0	1	1	1	1	1	0
NOS1	2.61	P1_P2_P3_P4_Sphenopalatine_VS_Lumbar_Coeliac_Stellate	1	1	1	1	0	0	0	1
GRID1	2.6	P4_VS_P1_P2_P3_Lumbar_Coeliac_Stellate_Sphenopalatine	0	0	0	1	0	0	0	0
HOXB5	2.6	P1_P2_P4_VS_P3_Lumbar_Coeliac_Stellate_Sphenopalatine	1	1	0	1	0	0	0	0
SKAP1	2.59	P4_VS_P1_P2_P3_Lumbar_Coeliac_Stellate_Sphenopalatine	0	0	0	1	0	0	0	0
MEGF10	2.59	P4_VS_P1_P2_P3_Lumbar_Coeliac_Stellate_Sphenopalatine	0	0	0	1	0	0	0	0
BAIAP2L1	2.58	P2_VS_P1_P3_P4_Lumbar_Coeliac_Stellate_Sphenopalatine	0	1	0	0	0	0	0	0
SLC38A11	2.58	P3_VS_P1_P2_P4_Lumbar_Coeliac_Stellate_Sphenopalatine	0	0	1	0	0	0	0	0
SHOX2	2.58	Coeliac_VS_P1_P2_P3_P4_Lumbar_Stellate_Sphenopalatine	0	0	0	0	0	1	0	0
PRKCB	2.58	P3_Lumbar_Coeliac_Stellate_VS_P1_P2_P4_Sphenopalatine	0	0	1	0	1	1	1	0
HSPB7	2.58	Sphenopalatine_VS_P1_P2_P3_P4_Lumbar_Coeliac_Stellate	0	0	0	0	0	0	0	1
CAV3	2.58	Sphenopalatine_VS_P1_P2_P3_P4_Lumbar_Coeliac_Stellate	0	0	0	0	0	0	0	1
IGF2	2.57	Sphenopalatine_VS_P1_P2_P3_P4_Lumbar_Coeliac_Stellate	0	0	0	0	0	0	0	1
ARPP21	2.57	Sphenopalatine_VS_P1_P2_P3_P4_Lumbar_Coeliac_Stellate	0	0	0	0	0	0	0	1
LRP1B	2.56	P3_VS_P1_P2_P4_Lumbar_Coeliac_Stellate_Sphenopalatine	0	0	1	0	0	0	0	0
CGNL1	2.56	P4_VS_P1_P2_P3_Lumbar_Coeliac_Stellate_Sphenopalatine	0	0	0	1	0	0	0	0
GM27164	2.55	P4_VS_P1_P2_P3_Lumbar_Coeliac_Stellate_Sphenopalatine	0	0	0	1	0	0	0	0
HOXB4	2.55	P4_VS_P1_P2_P3_Lumbar_Coeliac_Stellate_Sphenopalatine	0	0	0	1	0	0	0	0
EPHA7	2.55	Sphenopalatine_VS_P1_P2_P3_P4_Lumbar_Coeliac_Stellate	0	0	0	0	0	0	0	1
HES1	2.55	P1_P2_P4_Sphenopalatine_VS_P3_Lumbar_Coeliac_Stellate	1	1	0	1	0	0	0	1
UST	2.54	P1_VS_P2_P3_P4_Lumbar_Coeliac_Stellate_Sphenopalatine	1	0	0	0	0	0	0	0
HOXB6	2.54	P4_VS_P1_P2_P3_Lumbar_Coeliac_Stellate_Sphenopalatine	0	0	0	1	0	0	0	0
NPTX2	2.54	P1_P2_P4_VS_P3_Lumbar_Coeliac_Stellate_Sphenopalatine	1	1	0	1	0	0	0	0
ADAMTS19	2.53	P3_Coeliac_VS_P1_P2_P4_Lumbar_Stellate_Sphenopalatine	0	0	1	0	0	1	0	0
NRN1	2.53	P1_P2_P3_P4_Lumbar_Coeliac_Stellate_VS_Sphenopalatine	1	1	1	1	1	1	1	0
SHISAL2A	2.53	P1_P2_P3_Lumbar_Coeliac_Stellate_Sphenopalatine_VS_P4	1	1	1	0	1	1	1	1
DNAH5	2.52	P4_VS_P1_P2_P3_Lumbar_Coeliac_Stellate_Sphenopalatine	0	0	0	1	0	0	0	0
SEMA5A	2.52	P4_VS_P1_P2_P3_Lumbar_Coeliac_Stellate_Sphenopalatine	0	0	0	1	0	0	0	0
PDYN	2.52	Lumbar_VS_P1_P2_P3_P4_Coeliac_Stellate_Sphenopalatine	0	0	0	0	1	0	0	0
RALYL	2.52	P1_P3_P4_Lumbar_Coeliac_Stellate_Sphenopalatine_VS_P2	1	0	1	1	1	1	1	1
BMP7	2.51	P4_VS_P1_P2_P3_Lumbar_Coeliac_Stellate_Sphenopalatine	0	0	0	1	0	0	0	0
HTRA4	2.51	P4_VS_P1_P2_P3_Lumbar_Coeliac_Stellate_Sphenopalatine	0	0	0	1	0	0	0	0
SSU2	2.51	P1_P2_P3_Lumbar_Coeliac_Stellate_Sphenopalatine_VS_P4	1	1	1	0	1	1	1	1
KCNMB2	2.5	Lumbar_VS_P1_P2_P3_P4_Coeliac_Stellate_Sphenopalatine	0	0	0	0	1	0	0	0
A330102I10RIK	2.5	P1_P2_P4_Lumbar_Coeliac_Stellate_Sphenopalatine_VS_P3	1	1	0	1	1	1	1	1
WHRN	2.49	P4_VS_P1_P2_P3_Lumbar_Coeliac_Stellate_Sphenopalatine	0	0	0	1	0	0	0	0
C2CD4B	2.49	Lumbar_Coeliac_VS_P1_P2_P3_P4_Stellate_Sphenopalatine	0	0	0	0	1	1	0	0
MARCH1	2.48	P2_VS_P1_P3_P4_Lumbar_Coeliac_Stellate_Sphenopalatine	0	1	0	0	0	0	0	0
BRINP3	2.48	P4_VS_P1_P2_P3_Lumbar_Coeliac_Stellate_Sphenopalatine	0	0	0	1	0	0	0	0
GCGR	2.47	P2_VS_P1_P3_P4_Lumbar_Coeliac_Stellate_Sphenopalatine	0	1	0	0	0	0	0	0
IL19	2.47	P4_VS_P1_P2_P3_Lumbar_Coeliac_Stellate_Sphenopalatine	0	0	0	1	0	0	0	0
RPRML	2.47	P4_VS_P1_P2_P3_Lumbar_Coeliac_Stellate_Sphenopalatine	0	0	0	1	0	0	0	0
DNASE1L3	2.47	Lumbar_VS_P1_P2_P3_P4_Coeliac_Stellate_Sphenopalatine	0	0	0	0	1	0	0	0
OLFR78	2.47	P1_P2_P4_Lumbar_Coeliac_Stellate_Sphenopalatine_VS_P3	1	1	0	1	1	1	1	1
INHBB	2.46	P2_VS_P1_P3_P4_Lumbar_Coeliac_Stellate_Sphenopalatine	0	1	0	0	0	0	0	0
SLC1A2	2.46	P1_P2_P4_VS_P3_Lumbar_Coeliac_Stellate_Sphenopalatine	1	1	0	1	0	0	0	0
CHST8	2.46	P1_P2_P3_P4_Lumbar_Coeliac_Stellate_VS_Sphenopalatine	1	1	1	1	1	1	1	0
CDH1	2.45	P4_VS_P1_P2_P3_Lumbar_Coeliac_Stellate_Sphenopalatine	0	0	0	1	0	0	0	0
MYO18B	2.44	P4_VS_P1_P2_P3_Lumbar_Coeliac_Stellate_Sphenopalatine	0	0	0	1	0	0	0	0
VCAN	2.44	P4_VS_P1_P2_P3_Lumbar_Coeliac_Stellate_Sphenopalatine	0	0	0	1	0	0	0	0
CACNG2	2.44	P1_P2_P4_Lumbar_Coeliac_Stellate_Sphenopalatine_VS_P3	1	1	0	1	1	1	1	1
SLC38A4	2.43	P3_VS_P1_P2_P4_Lumbar_Coeliac_Stellate_Sphenopalatine	0	0	1	0	0	0	0	0
FGF10	2.43	Lumbar_Coeliac_Stellate_VS_P1_P2_P3_P4_Sphenopalatine	0	0	0	0	1	1	1	0
KITL	2.43	P3_Lumbar_Coeliac_Stellate_VS_P1_P2_P4_Sphenopalatine	0	0	1	0	1	1	1	0
GM15270	2.42	P4_VS_P1_P2_P3_Lumbar_Coeliac_Stellate_Sphenopalatine	0	0	0	1	0	0	0	0
LRRTM2	2.42	P4_VS_P1_P2_P3_Lumbar_Coeliac_Stellate_Sphenopalatine	0	0	0	1	0	0	0	0
FBP2	2.42	Lumbar_Coeliac_VS_P1_P2_P3_P4_Stellate_Sphenopalatine	0	0	0	0	1	1	0	0
C1QL1	2.41	P3_Lumbar_Coeliac_Stellate_VS_P1_P2_P4_Sphenopalatine	0	0	1	0	1	1	1	0
WNT4	2.4	P4_VS_P1_P2_P3_Lumbar_Coeliac_Stellate_Sphenopalatine	0	0	0	1	0	0	0	0
LDB2	2.4	P4_VS_P1_P2_P3_Lumbar_Coeliac_Stellate_Sphenopalatine	0	0	0	1	0	0	0	0
PTH1R	2.4	P1_P2_P4_Sphenopalatine_VS_P3_Lumbar_Coeliac_Stellate	1	1	0	1	0	0	0	1
SMCO3	2.39	P1_P4_VS_P2_P3_Lumbar_Coeliac_Stellate_Sphenopalatine	1	0	0	1	0	0	0	0
CAMK2N1	2.39	P1_P2_P3_P4_Lumbar_Coeliac_Sphenopalatine_VS_Stellate	1	1	1	1	1	1	0	1
GM29374	2.38	Lumbar_Coeliac_VS_P1_P2_P3_P4_Stellate_Sphenopalatine	0	0	0	0	1	1	0	0
C1QTNF6	2.38	P1_P2_P4_Sphenopalatine_VS_P3_Lumbar_Coeliac_Stellate	1	1	0	1	0	0	0	1
PEG12	2.37	P2_VS_P1_P3_P4_Lumbar_Coeliac_Stellate_Sphenopalatine	0	1	0	0	0	0	0	0
LGALS7	2.37	P3_Lumbar_Coeliac_Stellate_VS_P1_P2_P4_Sphenopalatine	0	0	1	0	1	1	1	0
RPP25	2.37	P3_Lumbar_Coeliac_Stellate_VS_P1_P2_P4_Sphenopalatine	0	0	1	0	1	1	1	0
TCERG1L	2.36	P2_P4_VS_P1_P3_Lumbar_Coeliac_Stellate_Sphenopalatine	0	1	0	1	0	0	0	0
COL25A1	2.36	P3_Coeliac_VS_P1_P2_P4_Lumbar_Stellate_Sphenopalatine	0	0	1	0	0	1	0	0
SLC5A7	2.36	P1_P2_P3_P4_Sphenopalatine_VS_Lumbar_Coeliac_Stellate	1	1	1	1	0	0	0	1
CACNB2	2.35	P4_VS_P1_P2_P3_Lumbar_Coeliac_Stellate_Sphenopalatine	0	0	0	1	0	0	0	0
TRABD2B	2.35	P4_VS_P1_P2_P3_Lumbar_Coeliac_Stellate_Sphenopalatine	0	0	0	1	0	0	0	0
TNS3	2.35	P1_P2_P4_VS_P3_Lumbar_Coeliac_Stellate_Sphenopalatine	1	1	0	1	0	0	0	0
DKK1	2.35	P1_P2_Lumbar_Coeliac_Stellate_VS_P3_P4_Sphenopalatine	1	1	0	0	1	1	1	0
RORB	2.35	P3_P4_Lumbar_Coeliac_Stellate_VS_P1_P2_Sphenopalatine	0	0	1	1	1	1	1	0
SMAD6	2.34	P2_VS_P1_P3_P4_Lumbar_Coeliac_Stellate_Sphenopalatine	0	1	0	0	0	0	0	0
RSAD2	2.34	P4_VS_P1_P2_P3_Lumbar_Coeliac_Stellate_Sphenopalatine	0	0	0	1	0	0	0	0
NPR3	2.34	P4_VS_P1_P2_P3_Lumbar_Coeliac_Stellate_Sphenopalatine	0	0	0	1	0	0	0	0
ANTXR2	2.34	P1_P2_P3_P4_Lumbar_Coeliac_Stellate_VS_Sphenopalatine	1	1	1	1	1	1	1	0
IGSF9	2.33	Lumbar_Coeliac_VS_P1_P2_P3_P4_Stellate_Sphenopalatine	0	0	0	0	1	1	0	0
FAM163B	2.33	P3_Lumbar_Coeliac_Stellate_VS_P1_P2_P4_Sphenopalatine	0	0	1	0	1	1	1	0
DIO2	2.33	P4_Sphenopalatine_VS_P1_P2_P3_Lumbar_Coeliac_Stellate	0	0	0	1	0	0	0	1
PROX1OS	2.32	P3_VS_P1_P2_P4_Lumbar_Coeliac_Stellate_Sphenopalatine	0	0	1	0	0	0	0	0
ANO2	2.32	P2_P3_VS_P1_P4_Lumbar_Coeliac_Stellate_Sphenopalatine	0	1	1	0	0	0	0	0
MAL2	2.32	P1_P3_P4_Lumbar_Coeliac_Stellate_Sphenopalatine_VS_P2	1	0	1	1	1	1	1	1
PCP4L1	2.31	P1_P2_VS_P3_P4_Lumbar_Coeliac_Stellate_Sphenopalatine	1	1	0	0	0	0	0	0
DSCAML1	2.31	Sphenopalatine_VS_P1_P2_P3_P4_Lumbar_Coeliac_Stellate	0	0	0	0	0	0	0	1
NWD2	2.31	P1_Sphenopalatine_VS_P2_P3_P4_Lumbar_Coeliac_Stellate	1	0	0	0	0	0	0	1
SLC18A3	2.31	P1_P2_P4_Sphenopalatine_VS_P3_Lumbar_Coeliac_Stellate	1	1	0	1	0	0	0	1
ZFP536	2.31	P1_P2_P3_P4_Sphenopalatine_VS_Lumbar_Coeliac_Stellate	1	1	1	1	0	0	0	1
S100A4	2.3	P3_VS_P1_P2_P4_Lumbar_Coeliac_Stellate_Sphenopalatine	0	0	1	0	0	0	0	0
TGFB2	2.3	P4_VS_P1_P2_P3_Lumbar_Coeliac_Stellate_Sphenopalatine	0	0	0	1	0	0	0	0
TANC1	2.3	P1_P2_P4_VS_P3_Lumbar_Coeliac_Stellate_Sphenopalatine	1	1	0	1	0	0	0	0
GALNTL6	2.3	Lumbar_Coeliac_VS_P1_P2_P3_P4_Stellate_Sphenopalatine	0	0	0	0	1	1	0	0
PCDH15	2.3	Sphenopalatine_VS_P1_P2_P3_P4_Lumbar_Coeliac_Stellate	0	0	0	0	0	0	0	1
MPPED1	2.29	Lumbar_VS_P1_P2_P3_P4_Coeliac_Stellate_Sphenopalatine	0	0	0	0	1	0	0	0
RPH3A	2.29	P2_P3_Lumbar_Coeliac_Stellate_VS_P1_P4_Sphenopalatine	0	1	1	0	1	1	1	0
ADCY2	2.29	P1_P2_P4_Sphenopalatine_VS_P3_Lumbar_Coeliac_Stellate	1	1	0	1	0	0	0	1
NPY2R	2.29	P1_P2_P3_P4_Coeliac_Sphenopalatine_VS_Lumbar_Stellate	1	1	1	1	0	1	0	1
SUSD5	2.29	P1_P2_P4_Lumbar_Coeliac_Stellate_Sphenopalatine_VS_P3	1	1	0	1	1	1	1	1
EPHB1	2.28	P1_P4_VS_P2_P3_Lumbar_Coeliac_Stellate_Sphenopalatine	1	0	0	1	0	0	0	0
PRKG1	2.28	P1_P2_P3_P4_VS_Lumbar_Coeliac_Stellate_Sphenopalatine	1	1	1	1	0	0	0	0
MASP1	2.28	P1_P2_P4_Sphenopalatine_VS_P3_Lumbar_Coeliac_Stellate	1	1	0	1	0	0	0	1
ADAMTS14	2.26	P2_VS_P1_P3_P4_Lumbar_Coeliac_Stellate_Sphenopalatine	0	1	0	0	0	0	0	0
LEPR	2.25	Lumbar_VS_P1_P2_P3_P4_Coeliac_Stellate_Sphenopalatine	0	0	0	0	1	0	0	0
CACNG5	2.25	P1_P2_P3_Lumbar_Coeliac_Stellate_VS_P4_Sphenopalatine	1	1	1	0	1	1	1	0
RXFP1	2.25	P4_Lumbar_Coeliac_Stellate_VS_P1_P2_P3_Sphenopalatine	0	0	0	1	1	1	1	0
GM11789	2.24	P2_VS_P1_P3_P4_Lumbar_Coeliac_Stellate_Sphenopalatine	0	1	0	0	0	0	0	0
GULO	2.24	P3_VS_P1_P2_P4_Lumbar_Coeliac_Stellate_Sphenopalatine	0	0	1	0	0	0	0	0
MMP17	2.24	P2_P3_VS_P1_P4_Lumbar_Coeliac_Stellate_Sphenopalatine	0	1	1	0	0	0	0	0
NXPH1	2.23	P4_VS_P1_P2_P3_Lumbar_Coeliac_Stellate_Sphenopalatine	0	0	0	1	0	0	0	0
MDGA1	2.23	P4_VS_P1_P2_P3_Lumbar_Coeliac_Stellate_Sphenopalatine	0	0	0	1	0	0	0	0
SERPINB7	2.22	Sphenopalatine_VS_P1_P2_P3_P4_Lumbar_Coeliac_Stellate	0	0	0	0	0	0	0	1
SLC24A2	2.22	P1_P2_P4_Sphenopalatine_VS_P3_Lumbar_Coeliac_Stellate	1	1	0	1	0	0	0	1
GM12166	2.22	P1_P2_P3_P4_Stellate_Sphenopalatine_VS_Lumbar_Coeliac	1	1	1	1	0	0	1	1
HSD17B14	2.21	P1_P2_P3_Lumbar_Coeliac_Stellate_VS_P4_Sphenopalatine	1	1	1	0	1	1	1	0
HOXA6	2.2	P4_VS_P1_P2_P3_Lumbar_Coeliac_Stellate_Sphenopalatine	0	0	0	1	0	0	0	0
GM48957	2.2	Lumbar_Coeliac_VS_P1_P2_P3_P4_Stellate_Sphenopalatine	0	0	0	0	1	1	0	0
ARHGAP20	2.2	P3_P4_Lumbar_Coeliac_VS_P1_P2_Stellate_Sphenopalatine	0	0	1	1	1	1	0	0
FAM20A	2.2	Lumbar_Coeliac_Stellate_VS_P1_P2_P3_P4_Sphenopalatine	0	0	0	0	1	1	1	0
STK17B	2.2	P3_Lumbar_Coeliac_Stellate_VS_P1_P2_P4_Sphenopalatine	0	0	1	0	1	1	1	0
PDE5A	2.2	P1_P4_Sphenopalatine_VS_P2_P3_Lumbar_Coeliac_Stellate	1	0	0	1	0	0	0	1
BC030500	2.2	P3_Lumbar_Coeliac_Stellate_Sphenopalatine_VS_P1_P2_P4	0	0	1	0	1	1	1	1
GM2464	2.2	P1_P3_P4_Lumbar_Coeliac_Stellate_Sphenopalatine_VS_P2	1	0	1	1	1	1	1	1
NOG	2.19	P2_VS_P1_P3_P4_Lumbar_Coeliac_Stellate_Sphenopalatine	0	1	0	0	0	0	0	0
NETO1	2.19	P2_VS_P1_P3_P4_Lumbar_Coeliac_Stellate_Sphenopalatine	0	1	0	0	0	0	0	0
TMEM163	2.19	P4_VS_P1_P2_P3_Lumbar_Coeliac_Stellate_Sphenopalatine	0	0	0	1	0	0	0	0
SYT13	2.19	Sphenopalatine_VS_P1_P2_P3_P4_Lumbar_Coeliac_Stellate	0	0	0	0	0	0	0	1
2610307P16RIK	2.19	P1_P2_P3_Lumbar_Coeliac_Stellate_Sphenopalatine_VS_P4	1	1	1	0	1	1	1	1
LMO1	2.19	P1_P3_P4_Lumbar_Coeliac_Stellate_Sphenopalatine_VS_P2	1	0	1	1	1	1	1	1
CNTN6	2.18	P4_VS_P1_P2_P3_Lumbar_Coeliac_Stellate_Sphenopalatine	0	0	0	1	0	0	0	0
GHR	2.18	P4_VS_P1_P2_P3_Lumbar_Coeliac_Stellate_Sphenopalatine	0	0	0	1	0	0	0	0
VSTM2B	2.18	Lumbar_VS_P1_P2_P3_P4_Coeliac_Stellate_Sphenopalatine	0	0	0	0	1	0	0	0
STUM	2.18	P2_Sphenopalatine_VS_P1_P3_P4_Lumbar_Coeliac_Stellate	0	1	0	0	0	0	0	1
GALNT3	2.17	Lumbar_Coeliac_VS_P1_P2_P3_P4_Stellate_Sphenopalatine	0	0	0	0	1	1	0	0
SOX13	2.16	P4_VS_P1_P2_P3_Lumbar_Coeliac_Stellate_Sphenopalatine	0	0	0	1	0	0	0	0
PLPP3	2.16	P4_VS_P1_P2_P3_Lumbar_Coeliac_Stellate_Sphenopalatine	0	0	0	1	0	0	0	0
NR0B1	2.16	P4_VS_P1_P2_P3_Lumbar_Coeliac_Stellate_Sphenopalatine	0	0	0	1	0	0	0	0
CLDN11	2.16	P3_Lumbar_Coeliac_Stellate_VS_P1_P2_P4_Sphenopalatine	0	0	1	0	1	1	1	0
SVIL	2.16	P1_P2_P4_Sphenopalatine_VS_P3_Lumbar_Coeliac_Stellate	1	1	0	1	0	0	0	1
CACHD1	2.15	P1_P2_P3_P4_Lumbar_Coeliac_Sphenopalatine_VS_Stellate	1	1	1	1	1	1	0	1
HCRTR1	2.15	P1_P3_P4_Lumbar_Coeliac_Stellate_Sphenopalatine_VS_P2	1	0	1	1	1	1	1	1
SIAH3	2.14	P4_VS_P1_P2_P3_Lumbar_Coeliac_Stellate_Sphenopalatine	0	0	0	1	0	0	0	0
SORCS1	2.14	P4_VS_P1_P2_P3_Lumbar_Coeliac_Stellate_Sphenopalatine	0	0	0	1	0	0	0	0
SLC30A10	2.14	P1_P4_VS_P2_P3_Lumbar_Coeliac_Stellate_Sphenopalatine	1	0	0	1	0	0	0	0
GM19434	2.14	P2_P4_VS_P1_P3_Lumbar_Coeliac_Stellate_Sphenopalatine	0	1	0	1	0	0	0	0
WNT5A	2.14	P2_P4_VS_P1_P3_Lumbar_Coeliac_Stellate_Sphenopalatine	0	1	0	1	0	0	0	0
MCC	2.14	P1_P2_P4_VS_P3_Lumbar_Coeliac_Stellate_Sphenopalatine	1	1	0	1	0	0	0	0
DSP	2.14	Coeliac_VS_P1_P2_P3_P4_Lumbar_Stellate_Sphenopalatine	0	0	0	0	0	1	0	0
EGLN3	2.14	P4_Lumbar_Coeliac_Stellate_VS_P1_P2_P3_Sphenopalatine	0	0	0	1	1	1	1	0
ARG1	2.14	P3_P4_Lumbar_Coeliac_Stellate_VS_P1_P2_Sphenopalatine	0	0	1	1	1	1	1	0
H19	2.14	Sphenopalatine_VS_P1_P2_P3_P4_Lumbar_Coeliac_Stellate	0	0	0	0	0	0	0	1
RGS4	2.14	P1_P2_P3_Lumbar_Coeliac_Stellate_Sphenopalatine_VS_P4	1	1	1	0	1	1	1	1
ADCY1	2.14	P1_P2_P3_Lumbar_Coeliac_Stellate_Sphenopalatine_VS_P4	1	1	1	0	1	1	1	1
KIT	2.13	P2_VS_P1_P3_P4_Lumbar_Coeliac_Stellate_Sphenopalatine	0	1	0	0	0	0	0	0
1110032F04RIK	2.13	P4_VS_P1_P2_P3_Lumbar_Coeliac_Stellate_Sphenopalatine	0	0	0	1	0	0	0	0
AI115009	2.13	P4_VS_P1_P2_P3_Lumbar_Coeliac_Stellate_Sphenopalatine	0	0	0	1	0	0	0	0
HOXA3	2.13	P4_VS_P1_P2_P3_Lumbar_Coeliac_Stellate_Sphenopalatine	0	0	0	1	0	0	0	0
BMP4	2.13	P1_P2_P3_P4_Lumbar_Coeliac_VS_Stellate_Sphenopalatine	1	1	1	1	1	1	0	0
TUNAR	2.13	Sphenopalatine_VS_P1_P2_P3_P4_Lumbar_Coeliac_Stellate	0	0	0	0	0	0	0	1
GM11549	2.13	Lumbar_Stellate_Sphenopalatine_VS_P1_P2_P3_P4_Coeliac	0	0	0	0	1	0	1	1
COL24A1	2.12	P1_VS_P2_P3_P4_Lumbar_Coeliac_Stellate_Sphenopalatine	1	0	0	0	0	0	0	0
SYTL4	2.12	P3_VS_P1_P2_P4_Lumbar_Coeliac_Stellate_Sphenopalatine	0	0	1	0	0	0	0	0
NTRK3	2.12	P1_P2_P4_VS_P3_Lumbar_Coeliac_Stellate_Sphenopalatine	1	1	0	1	0	0	0	0
GLB1L2	2.11	P2_VS_P1_P3_P4_Lumbar_Coeliac_Stellate_Sphenopalatine	0	1	0	0	0	0	0	0
ADAMTSL2	2.11	P3_VS_P1_P2_P4_Lumbar_Coeliac_Stellate_Sphenopalatine	0	0	1	0	0	0	0	0
CCKAR	2.11	Coeliac_VS_P1_P2_P3_P4_Lumbar_Stellate_Sphenopalatine	0	0	0	0	0	1	0	0
PPP1R17	2.11	P3_Lumbar_Coeliac_Stellate_VS_P1_P2_P4_Sphenopalatine	0	0	1	0	1	1	1	0
RTN4RL1	2.11	P1_P2_P4_Lumbar_Coeliac_Stellate_Sphenopalatine_VS_P3	1	1	0	1	1	1	1	1
CBLN2	2.1	P1_VS_P2_P3_P4_Lumbar_Coeliac_Stellate_Sphenopalatine	1	0	0	0	0	0	0	0
GM16105	2.1	Lumbar_Coeliac_VS_P1_P2_P3_P4_Stellate_Sphenopalatine	0	0	0	0	1	1	0	0
ELN	2.09	P1_P2_P3_P4_VS_Lumbar_Coeliac_Stellate_Sphenopalatine	1	1	1	1	0	0	0	0
STK32B	2.09	P4_Lumbar_Coeliac_Stellate_VS_P1_P2_P3_Sphenopalatine	0	0	0	1	1	1	1	0
RAPGEF5	2.09	P3_P4_Lumbar_Coeliac_Stellate_VS_P1_P2_Sphenopalatine	0	0	1	1	1	1	1	0
B230334C09RIK	2.09	Sphenopalatine_VS_P1_P2_P3_P4_Lumbar_Coeliac_Stellate	0	0	0	0	0	0	0	1
ASCL1	2.09	Sphenopalatine_VS_P1_P2_P3_P4_Lumbar_Coeliac_Stellate	0	0	0	0	0	0	0	1
FAM122B	2.09	P1_P2_P3_P4_Sphenopalatine_VS_Lumbar_Coeliac_Stellate	1	1	1	1	0	0	0	1
HBA-A2	2.09	P1_P2_P3_P4_Stellate_Sphenopalatine_VS_Lumbar_Coeliac	1	1	1	1	0	0	1	1
HOPX	2.08	P4_VS_P1_P2_P3_Lumbar_Coeliac_Stellate_Sphenopalatine	0	0	0	1	0	0	0	0
LRFN2	2.08	P4_VS_P1_P2_P3_Lumbar_Coeliac_Stellate_Sphenopalatine	0	0	0	1	0	0	0	0
ROBO1	2.08	P3_P4_VS_P1_P2_Lumbar_Coeliac_Stellate_Sphenopalatine	0	0	1	1	0	0	0	0
ADCYAP1	2.08	P1_P2_P4_Sphenopalatine_VS_P3_Lumbar_Coeliac_Stellate	1	1	0	1	0	0	0	1
CNTN4	2.07	P4_Lumbar_VS_P1_P2_P3_Coeliac_Stellate_Sphenopalatine	0	0	0	1	1	0	0	0
9230102O04RIK	2.07	P3_Lumbar_Coeliac_Stellate_VS_P1_P2_P4_Sphenopalatine	0	0	1	0	1	1	1	0
LSR	2.07	Sphenopalatine_VS_P1_P2_P3_P4_Lumbar_Coeliac_Stellate	0	0	0	0	0	0	0	1
CCL1	2.06	P3_VS_P1_P2_P4_Lumbar_Coeliac_Stellate_Sphenopalatine	0	0	1	0	0	0	0	0
PXYLP1	2.06	P1_P2_P3_Sphenopalatine_VS_P4_Lumbar_Coeliac_Stellate	1	1	1	0	0	0	0	1
KCNK3	2.06	P1_P2_P3_P4_Lumbar_Coeliac_Sphenopalatine_VS_Stellate	1	1	1	1	1	1	0	1
CLMN	2.05	P1_P2_P3_P4_VS_Lumbar_Coeliac_Stellate_Sphenopalatine	1	1	1	1	0	0	0	0
VWC2	2.04	P1_VS_P2_P3_P4_Lumbar_Coeliac_Stellate_Sphenopalatine	1	0	0	0	0	0	0	0
TMEM132B	2.04	P2_VS_P1_P3_P4_Lumbar_Coeliac_Stellate_Sphenopalatine	0	1	0	0	0	0	0	0
CES5A	2.04	P4_VS_P1_P2_P3_Lumbar_Coeliac_Stellate_Sphenopalatine	0	0	0	1	0	0	0	0
PROCR	2.04	P3_Lumbar_Coeliac_Stellate_VS_P1_P2_P4_Sphenopalatine	0	0	1	0	1	1	1	0
GM2832	2.04	Sphenopalatine_VS_P1_P2_P3_P4_Lumbar_Coeliac_Stellate	0	0	0	0	0	0	0	1
LOX	2.03	P4_VS_P1_P2_P3_Lumbar_Coeliac_Stellate_Sphenopalatine	0	0	0	1	0	0	0	0
KCNK9	2.03	P1_Lumbar_Coeliac_Sphenopalatine_VS_P2_P3_P4_Stellate	1	0	0	0	1	1	0	1
TMEM158	2.03	P1_P2_P3_P4_Lumbar_Coeliac_Sphenopalatine_VS_Stellate	1	1	1	1	1	1	0	1
SMCO4	2.02	P4_VS_P1_P2_P3_Lumbar_Coeliac_Stellate_Sphenopalatine	0	0	0	1	0	0	0	0
RARB	2.02	P4_VS_P1_P2_P3_Lumbar_Coeliac_Stellate_Sphenopalatine	0	0	0	1	0	0	0	0
HIST1H4D	2.02	Lumbar_Coeliac_VS_P1_P2_P3_P4_Stellate_Sphenopalatine	0	0	0	0	1	1	0	0
HIST1H1E	2.02	Lumbar_Coeliac_VS_P1_P2_P3_P4_Stellate_Sphenopalatine	0	0	0	0	1	1	0	0
STEAP2	2.01	P4_VS_P1_P2_P3_Lumbar_Coeliac_Stellate_Sphenopalatine	0	0	0	1	0	0	0	0
FAM187B	2.01	Sphenopalatine_VS_P1_P2_P3_P4_Lumbar_Coeliac_Stellate	0	0	0	0	0	0	0	1
CNR1	2.01	P1_P2_P3_P4_Lumbar_Coeliac_Sphenopalatine_VS_Stellate	1	1	1	1	1	1	0	1
PCDH11X	2	P1_VS_P2_P3_P4_Lumbar_Coeliac_Stellate_Sphenopalatine	1	0	0	0	0	0	0	0
CYP4B1	2	P3_VS_P1_P2_P4_Lumbar_Coeliac_Stellate_Sphenopalatine	0	0	1	0	0	0	0	0
CAMKV	2	P3_VS_P1_P2_P4_Lumbar_Coeliac_Stellate_Sphenopalatine	0	0	1	0	0	0	0	0
SCN7A	2	P4_VS_P1_P2_P3_Lumbar_Coeliac_Stellate_Sphenopalatine	0	0	0	1	0	0	0	0
CSMD1	2	P4_VS_P1_P2_P3_Lumbar_Coeliac_Stellate_Sphenopalatine	0	0	0	1	0	0	0	0
PRKD1	2	P4_VS_P1_P2_P3_Lumbar_Coeliac_Stellate_Sphenopalatine	0	0	0	1	0	0	0	0
CDK6	2	P2_P4_VS_P1_P3_Lumbar_Coeliac_Stellate_Sphenopalatine	0	1	0	1	0	0	0	0
PROX1	2	P1_P2_P3_Lumbar_Coeliac_VS_P4_Stellate_Sphenopalatine	1	1	1	0	1	1	0	0
PLD2	2	P1_P2_P4_Sphenopalatine_VS_P3_Lumbar_Coeliac_Stellate	1	1	0	1	0	0	0	1
GPER1	1.99	P3_VS_P1_P2_P4_Lumbar_Coeliac_Stellate_Sphenopalatine	0	0	1	0	0	0	0	0
KCNJ6	1.99	P4_VS_P1_P2_P3_Lumbar_Coeliac_Stellate_Sphenopalatine	0	0	0	1	0	0	0	0
GAL	1.99	Lumbar_Coeliac_Stellate_VS_P1_P2_P3_P4_Sphenopalatine	0	0	0	0	1	1	1	0
DCC	1.99	P1_P2_P3_Lumbar_Coeliac_Stellate_Sphenopalatine_VS_P4	1	1	1	0	1	1	1	1
HS3ST2	1.98	P3_VS_P1_P2_P4_Lumbar_Coeliac_Stellate_Sphenopalatine	0	0	1	0	0	0	0	0
MGST1	1.98	P4_VS_P1_P2_P3_Lumbar_Coeliac_Stellate_Sphenopalatine	0	0	0	1	0	0	0	0
AARD	1.97	P4_VS_P1_P2_P3_Lumbar_Coeliac_Stellate_Sphenopalatine	0	0	0	1	0	0	0	0
ADCY8	1.97	P4_VS_P1_P2_P3_Lumbar_Coeliac_Stellate_Sphenopalatine	0	0	0	1	0	0	0	0
TRMT9B	1.97	P1_P2_P4_VS_P3_Lumbar_Coeliac_Stellate_Sphenopalatine	1	1	0	1	0	0	0	0
DKK2	1.97	P3_Lumbar_Coeliac_VS_P1_P2_P4_Stellate_Sphenopalatine	0	0	1	0	1	1	0	0
ADORA1	1.97	P1_P2_P3_P4_Sphenopalatine_VS_Lumbar_Coeliac_Stellate	1	1	1	1	0	0	0	1
FAM135B	1.96	P3_VS_P1_P2_P4_Lumbar_Coeliac_Stellate_Sphenopalatine	0	0	1	0	0	0	0	0
MAP3K5	1.96	P4_VS_P1_P2_P3_Lumbar_Coeliac_Stellate_Sphenopalatine	0	0	0	1	0	0	0	0
UBTD2	1.96	P1_P2_P3_P4_Lumbar_Coeliac_VS_Stellate_Sphenopalatine	1	1	1	1	1	1	0	0
CHN2	1.96	P1_P4_Sphenopalatine_VS_P2_P3_Lumbar_Coeliac_Stellate	1	0	0	1	0	0	0	1
CAMK2A	1.95	P3_VS_P1_P2_P4_Lumbar_Coeliac_Stellate_Sphenopalatine	0	0	1	0	0	0	0	0
HHIP	1.95	P2_P4_VS_P1_P3_Lumbar_Coeliac_Stellate_Sphenopalatine	0	1	0	1	0	0	0	0
LHFPL2	1.95	P2_P4_VS_P1_P3_Lumbar_Coeliac_Stellate_Sphenopalatine	0	1	0	1	0	0	0	0
CHST5	1.95	Lumbar_VS_P1_P2_P3_P4_Coeliac_Stellate_Sphenopalatine	0	0	0	0	1	0	0	0
GM5468	1.95	Lumbar_Coeliac_VS_P1_P2_P3_P4_Stellate_Sphenopalatine	0	0	0	0	1	1	0	0
NKAIN3	1.95	P1_P3_P4_Lumbar_Sphenopalatine_VS_P2_Coeliac_Stellate	1	0	1	1	1	0	0	1
GM16499.1	1.95	P1_P3_P4_Lumbar_Coeliac_Stellate_Sphenopalatine_VS_P2	1	0	1	1	1	1	1	1
TENT5C	1.94	P4_VS_P1_P2_P3_Lumbar_Coeliac_Stellate_Sphenopalatine	0	0	0	1	0	0	0	0
MYLIP	1.94	P4_VS_P1_P2_P3_Lumbar_Coeliac_Stellate_Sphenopalatine	0	0	0	1	0	0	0	0
SYNDIG1	1.94	P1_P2_Sphenopalatine_VS_P3_P4_Lumbar_Coeliac_Stellate	1	1	0	0	0	0	0	1
HBA-A1	1.94	P1_P2_P3_P4_Coeliac_Stellate_Sphenopalatine_VS_Lumbar	1	1	1	1	0	1	1	1
SP5	1.93	P4_VS_P1_P2_P3_Lumbar_Coeliac_Stellate_Sphenopalatine	0	0	0	1	0	0	0	0
RARRES1	1.93	P3_P4_Lumbar_Coeliac_Stellate_VS_P1_P2_Sphenopalatine	0	0	1	1	1	1	1	0
CDH6	1.93	P1_P2_P4_Lumbar_Coeliac_Stellate_Sphenopalatine_VS_P3	1	1	0	1	1	1	1	1
KLB	1.92	P4_VS_P1_P2_P3_Lumbar_Coeliac_Stellate_Sphenopalatine	0	0	0	1	0	0	0	0
GAD2	1.92	Coeliac_VS_P1_P2_P3_P4_Lumbar_Stellate_Sphenopalatine	0	0	0	0	0	1	0	0
ZEB2	1.92	P1_P2_P3_P4_Coeliac_Sphenopalatine_VS_Lumbar_Stellate	1	1	1	1	0	1	0	1
A830092H15RIK	1.91	P1_VS_P2_P3_P4_Lumbar_Coeliac_Stellate_Sphenopalatine	1	0	0	0	0	0	0	0
B3GAT1	1.91	P2_P4_Lumbar_Coeliac_Stellate_VS_P1_P3_Sphenopalatine	0	1	0	1	1	1	1	0
DLL4	1.9	P4_VS_P1_P2_P3_Lumbar_Coeliac_Stellate_Sphenopalatine	0	0	0	1	0	0	0	0
RGS6	1.9	P4_VS_P1_P2_P3_Lumbar_Coeliac_Stellate_Sphenopalatine	0	0	0	1	0	0	0	0
ADGRG2	1.9	Lumbar_VS_P1_P2_P3_P4_Coeliac_Stellate_Sphenopalatine	0	0	0	0	1	0	0	0
PRODH	1.9	Lumbar_Coeliac_VS_P1_P2_P3_P4_Stellate_Sphenopalatine	0	0	0	0	1	1	0	0
CFAP61	1.9	Lumbar_Coeliac_Stellate_VS_P1_P2_P3_P4_Sphenopalatine	0	0	0	0	1	1	1	0
DMKN	1.9	Lumbar_Coeliac_Stellate_VS_P1_P2_P3_P4_Sphenopalatine	0	0	0	0	1	1	1	0
ITGA2	1.89	P3_VS_P1_P2_P4_Lumbar_Coeliac_Stellate_Sphenopalatine	0	0	1	0	0	0	0	0
HSF4	1.88	P4_VS_P1_P2_P3_Lumbar_Coeliac_Stellate_Sphenopalatine	0	0	0	1	0	0	0	0
GABRA1	1.88	P2_P4_VS_P1_P3_Lumbar_Coeliac_Stellate_Sphenopalatine	0	1	0	1	0	0	0	0
CCDC85A	1.88	P1_P2_P3_P4_Lumbar_Coeliac_VS_Stellate_Sphenopalatine	1	1	1	1	1	1	0	0
SPINK8	1.87	P4_VS_P1_P2_P3_Lumbar_Coeliac_Stellate_Sphenopalatine	0	0	0	1	0	0	0	0
BANF2OS	1.87	P3_Lumbar_Coeliac_Stellate_VS_P1_P2_P4_Sphenopalatine	0	0	1	0	1	1	1	0
TRF	1.87	P3_Lumbar_Coeliac_Stellate_VS_P1_P2_P4_Sphenopalatine	0	0	1	0	1	1	1	0
C030017B01RIK	1.87	P1_P2_P4_Lumbar_Coeliac_Stellate_VS_P3_Sphenopalatine	1	1	0	1	1	1	1	0
RNF182	1.87	P1_P2_P3_P4_Lumbar_Coeliac_Sphenopalatine_VS_Stellate	1	1	1	1	1	1	0	1
NECAB2	1.86	Lumbar_VS_P1_P2_P3_P4_Coeliac_Stellate_Sphenopalatine	0	0	0	0	1	0	0	0
JDP2	1.86	P1_P2_P3_P4_Lumbar_Coeliac_VS_Stellate_Sphenopalatine	1	1	1	1	1	1	0	0
CNGA3	1.86	Sphenopalatine_VS_P1_P2_P3_P4_Lumbar_Coeliac_Stellate	0	0	0	0	0	0	0	1
NKD2	1.86	Sphenopalatine_VS_P1_P2_P3_P4_Lumbar_Coeliac_Stellate	0	0	0	0	0	0	0	1
PLPPR5	1.86	P1_P3_Lumbar_Coeliac_Stellate_Sphenopalatine_VS_P2_P4	1	0	1	0	1	1	1	1
CTTNBP2	1.86	P1_P2_P4_Lumbar_Coeliac_Stellate_Sphenopalatine_VS_P3	1	1	0	1	1	1	1	1
LRRC4C	1.85	P3_VS_P1_P2_P4_Lumbar_Coeliac_Stellate_Sphenopalatine	0	0	1	0	0	0	0	0
JADE2	1.85	P1_P2_P4_VS_P3_Lumbar_Coeliac_Stellate_Sphenopalatine	1	1	0	1	0	0	0	0
TGFBI	1.85	P1_Sphenopalatine_VS_P2_P3_P4_Lumbar_Coeliac_Stellate	1	0	0	0	0	0	0	1
SLC35F4	1.84	P2_P4_VS_P1_P3_Lumbar_Coeliac_Stellate_Sphenopalatine	0	1	0	1	0	0	0	0
RGS5	1.84	P3_Lumbar_Coeliac_Stellate_VS_P1_P2_P4_Sphenopalatine	0	0	1	0	1	1	1	0
KCNIP1	1.84	Lumbar_Coeliac_Sphenopalatine_VS_P1_P2_P3_P4_Stellate	0	0	0	0	1	1	0	1
4632428C04RIK	1.83	P1_P2_VS_P3_P4_Lumbar_Coeliac_Stellate_Sphenopalatine	1	1	0	0	0	0	0	0
GM26512	1.83	P4_VS_P1_P2_P3_Lumbar_Coeliac_Stellate_Sphenopalatine	0	0	0	1	0	0	0	0
KRT9	1.83	P4_Lumbar_VS_P1_P2_P3_Coeliac_Stellate_Sphenopalatine	0	0	0	1	1	0	0	0
CRLF1	1.82	P4_VS_P1_P2_P3_Lumbar_Coeliac_Stellate_Sphenopalatine	0	0	0	1	0	0	0	0
NXPH4	1.82	Lumbar_VS_P1_P2_P3_P4_Coeliac_Stellate_Sphenopalatine	0	0	0	0	1	0	0	0
NDUFA4L2	1.82	Lumbar_Coeliac_VS_P1_P2_P3_P4_Stellate_Sphenopalatine	0	0	0	0	1	1	0	0
LMO4	1.82	P1_P2_P4_Sphenopalatine_VS_P3_Lumbar_Coeliac_Stellate	1	1	0	1	0	0	0	1
PTPRK	1.81	P4_VS_P1_P2_P3_Lumbar_Coeliac_Stellate_Sphenopalatine	0	0	0	1	0	0	0	0
BDNF	1.81	P1_P2_P3_Lumbar_Coeliac_Stellate_VS_P4_Sphenopalatine	1	1	1	0	1	1	1	0
RNF128	1.81	P1_P2_P3_P4_Sphenopalatine_VS_Lumbar_Coeliac_Stellate	1	1	1	1	0	0	0	1
NLGN1	1.81	P1_P2_P4_Lumbar_Coeliac_Stellate_Sphenopalatine_VS_P3	1	1	0	1	1	1	1	1
AQP1	1.8	P3_VS_P1_P2_P4_Lumbar_Coeliac_Stellate_Sphenopalatine	0	0	1	0	0	0	0	0
PNLIP	1.8	P3_VS_P1_P2_P4_Lumbar_Coeliac_Stellate_Sphenopalatine	0	0	1	0	0	0	0	0
SCX	1.8	P4_VS_P1_P2_P3_Lumbar_Coeliac_Stellate_Sphenopalatine	0	0	0	1	0	0	0	0
DIRAS2	1.8	Lumbar_Coeliac_VS_P1_P2_P3_P4_Stellate_Sphenopalatine	0	0	0	0	1	1	0	0
PPARA	1.8	Lumbar_Coeliac_VS_P1_P2_P3_P4_Stellate_Sphenopalatine	0	0	0	0	1	1	0	0
FLRT2	1.8	P1_P2_P4_Lumbar_Sphenopalatine_VS_P3_Coeliac_Stellate	1	1	0	1	1	0	0	1
SCUBE1	1.8	P1_P2_P3_P4_Lumbar_Coeliac_Sphenopalatine_VS_Stellate	1	1	1	1	1	1	0	1
SYNPO2	1.79	Lumbar_VS_P1_P2_P3_P4_Coeliac_Stellate_Sphenopalatine	0	0	0	0	1	0	0	0
SEMA6A	1.79	Lumbar_VS_P1_P2_P3_P4_Coeliac_Stellate_Sphenopalatine	0	0	0	0	1	0	0	0
GM17167	1.79	P1_P2_P3_P4_Lumbar_Coeliac_VS_Stellate_Sphenopalatine	1	1	1	1	1	1	0	0
DACH1	1.78	P1_VS_P2_P3_P4_Lumbar_Coeliac_Stellate_Sphenopalatine	1	0	0	0	0	0	0	0
GM20559	1.78	P3_VS_P1_P2_P4_Lumbar_Coeliac_Stellate_Sphenopalatine	0	0	1	0	0	0	0	0
ZFP703	1.78	P4_VS_P1_P2_P3_Lumbar_Coeliac_Stellate_Sphenopalatine	0	0	0	1	0	0	0	0
PGR	1.78	P4_VS_P1_P2_P3_Lumbar_Coeliac_Stellate_Sphenopalatine	0	0	0	1	0	0	0	0
KCNA5	1.78	P1_P2_P4_Sphenopalatine_VS_P3_Lumbar_Coeliac_Stellate	1	1	0	1	0	0	0	1
XKR4	1.78	P1_P2_P3_P4_Lumbar_Coeliac_Sphenopalatine_VS_Stellate	1	1	1	1	1	1	0	1
CEBPB	1.78	P1_P2_P3_P4_Lumbar_Coeliac_Sphenopalatine_VS_Stellate	1	1	1	1	1	1	0	1
NTRK2	1.77	P4_VS_P1_P2_P3_Lumbar_Coeliac_Stellate_Sphenopalatine	0	0	0	1	0	0	0	0
SLC16A10	1.77	Lumbar_Coeliac_VS_P1_P2_P3_P4_Stellate_Sphenopalatine	0	0	0	0	1	1	0	0
ARHGAP36	1.77	P1_P2_P4_Lumbar_Coeliac_Stellate_VS_P3_Sphenopalatine	1	1	0	1	1	1	1	0
ESR1	1.76	P2_P4_VS_P1_P3_Lumbar_Coeliac_Stellate_Sphenopalatine	0	1	0	1	0	0	0	0
BC049352	1.76	Lumbar_VS_P1_P2_P3_P4_Coeliac_Stellate_Sphenopalatine	0	0	0	0	1	0	0	0
SYT2	1.76	P1_P2_P3_Lumbar_Coeliac_Stellate_Sphenopalatine_VS_P4	1	1	1	0	1	1	1	1
GAD1OS	1.75	P4_VS_P1_P2_P3_Lumbar_Coeliac_Stellate_Sphenopalatine	0	0	0	1	0	0	0	0
KCNAB1	1.75	P4_Sphenopalatine_VS_P1_P2_P3_Lumbar_Coeliac_Stellate	0	0	0	1	0	0	0	1
CLSTN2	1.75	P4_Sphenopalatine_VS_P1_P2_P3_Lumbar_Coeliac_Stellate	0	0	0	1	0	0	0	1
TIMP4	1.75	P1_P2_P3_Lumbar_Coeliac_Stellate_Sphenopalatine_VS_P4	1	1	1	0	1	1	1	1
1700019D03RIK	1.74	P2_VS_P1_P3_P4_Lumbar_Coeliac_Stellate_Sphenopalatine	0	1	0	0	0	0	0	0
HIC1	1.74	P4_VS_P1_P2_P3_Lumbar_Coeliac_Stellate_Sphenopalatine	0	0	0	1	0	0	0	0
CHST2	1.74	P1_P2_P4_VS_P3_Lumbar_Coeliac_Stellate_Sphenopalatine	1	1	0	1	0	0	0	0
RGS9	1.74	P1_P2_P3_P4_Lumbar_Coeliac_Sphenopalatine_VS_Stellate	1	1	1	1	1	1	0	1
TMIE	1.73	P3_VS_P1_P2_P4_Lumbar_Coeliac_Stellate_Sphenopalatine	0	0	1	0	0	0	0	0
BMP2	1.73	Lumbar_VS_P1_P2_P3_P4_Coeliac_Stellate_Sphenopalatine	0	0	0	0	1	0	0	0
CDKL1	1.73	Lumbar_Coeliac_VS_P1_P2_P3_P4_Stellate_Sphenopalatine	0	0	0	0	1	1	0	0
CPVL	1.73	Lumbar_Coeliac_Stellate_VS_P1_P2_P3_P4_Sphenopalatine	0	0	0	0	1	1	1	0
AIRN	1.73	P1_P2_P3_P4_Lumbar_Coeliac_Stellate_VS_Sphenopalatine	1	1	1	1	1	1	1	0
OLFR560	1.72	P1_VS_P2_P3_P4_Lumbar_Coeliac_Stellate_Sphenopalatine	1	0	0	0	0	0	0	0
VLDLR	1.72	P2_P4_VS_P1_P3_Lumbar_Coeliac_Stellate_Sphenopalatine	0	1	0	1	0	0	0	0
SLC30A3	1.72	Stellate_VS_P1_P2_P3_P4_Lumbar_Coeliac_Sphenopalatine	0	0	0	0	0	0	1	0
SORCS3	1.72	P2_P3_Sphenopalatine_VS_P1_P4_Lumbar_Coeliac_Stellate	0	1	1	0	0	0	0	1
NACC2	1.72	P1_P2_P4_Sphenopalatine_VS_P3_Lumbar_Coeliac_Stellate	1	1	0	1	0	0	0	1
ID4	1.72	P1_P2_P4_Lumbar_Coeliac_Sphenopalatine_VS_P3_Stellate	1	1	0	1	1	1	0	1
FGF18	1.71	P4_VS_P1_P2_P3_Lumbar_Coeliac_Stellate_Sphenopalatine	0	0	0	1	0	0	0	0
ADM	1.71	P3_P4_Lumbar_Coeliac_Stellate_VS_P1_P2_Sphenopalatine	0	0	1	1	1	1	1	0
TMEM255B	1.71	P4_Sphenopalatine_VS_P1_P2_P3_Lumbar_Coeliac_Stellate	0	0	0	1	0	0	0	1
RGS8	1.7	P2_VS_P1_P3_P4_Lumbar_Coeliac_Stellate_Sphenopalatine	0	1	0	0	0	0	0	0
TMEM150C	1.7	P4_VS_P1_P2_P3_Lumbar_Coeliac_Stellate_Sphenopalatine	0	0	0	1	0	0	0	0
CTNNA1	1.7	P4_VS_P1_P2_P3_Lumbar_Coeliac_Stellate_Sphenopalatine	0	0	0	1	0	0	0	0
ROBO2	1.7	P3_P4_VS_P1_P2_Lumbar_Coeliac_Stellate_Sphenopalatine	0	0	1	1	0	0	0	0
TSPAN33	1.7	P1_P2_P3_P4_Lumbar_Coeliac_VS_Stellate_Sphenopalatine	1	1	1	1	1	1	0	0
PHYHIP	1.7	Lumbar_Coeliac_Stellate_VS_P1_P2_P3_P4_Sphenopalatine	0	0	0	0	1	1	1	0
GSG1L	1.7	Sphenopalatine_VS_P1_P2_P3_P4_Lumbar_Coeliac_Stellate	0	0	0	0	0	0	0	1
PLXDC2	1.7	P1_Sphenopalatine_VS_P2_P3_P4_Lumbar_Coeliac_Stellate	1	0	0	0	0	0	0	1
PLXNA2	1.7	P2_P4_Sphenopalatine_VS_P1_P3_Lumbar_Coeliac_Stellate	0	1	0	1	0	0	0	1
IGFBP5	1.7	P1_P2_P3_P4_Lumbar_Coeliac_Sphenopalatine_VS_Stellate	1	1	1	1	1	1	0	1
CPNE4	1.7	P1_P2_P3_P4_Lumbar_Coeliac_Sphenopalatine_VS_Stellate	1	1	1	1	1	1	0	1
APOLD1	1.69	P3_VS_P1_P2_P4_Lumbar_Coeliac_Stellate_Sphenopalatine	0	0	1	0	0	0	0	0
GLDN	1.69	P3_VS_P1_P2_P4_Lumbar_Coeliac_Stellate_Sphenopalatine	0	0	1	0	0	0	0	0
D830030K20RIK	1.69	P3_VS_P1_P2_P4_Lumbar_Coeliac_Stellate_Sphenopalatine	0	0	1	0	0	0	0	0
CXCL12	1.69	P4_VS_P1_P2_P3_Lumbar_Coeliac_Stellate_Sphenopalatine	0	0	0	1	0	0	0	0
SHB	1.69	Lumbar_VS_P1_P2_P3_P4_Coeliac_Stellate_Sphenopalatine	0	0	0	0	1	0	0	0
DBH	1.69	P3_Lumbar_Coeliac_Stellate_VS_P1_P2_P4_Sphenopalatine	0	0	1	0	1	1	1	0
ZFP503	1.69	Sphenopalatine_VS_P1_P2_P3_P4_Lumbar_Coeliac_Stellate	0	0	0	0	0	0	0	1
FGF9	1.68	P4_VS_P1_P2_P3_Lumbar_Coeliac_Stellate_Sphenopalatine	0	0	0	1	0	0	0	0
PRRT4	1.68	Lumbar_Coeliac_VS_P1_P2_P3_P4_Stellate_Sphenopalatine	0	0	0	0	1	1	0	0
SPATS2L	1.68	P1_P2_P4_Lumbar_Coeliac_Sphenopalatine_VS_P3_Stellate	1	1	0	1	1	1	0	1
TMEM26	1.67	P2_VS_P1_P3_P4_Lumbar_Coeliac_Stellate_Sphenopalatine	0	1	0	0	0	0	0	0
NEXMIF	1.67	Lumbar_Coeliac_VS_P1_P2_P3_P4_Stellate_Sphenopalatine	0	0	0	0	1	1	0	0
ZFPM1	1.67	P1_P2_P3_P4_Lumbar_Coeliac_Stellate_VS_Sphenopalatine	1	1	1	1	1	1	1	0
ADAMTS20	1.67	Sphenopalatine_VS_P1_P2_P3_P4_Lumbar_Coeliac_Stellate	0	0	0	0	0	0	0	1
CCKBR	1.67	P3_Sphenopalatine_VS_P1_P2_P4_Lumbar_Coeliac_Stellate	0	0	1	0	0	0	0	1
HOMER2	1.67	P1_P2_P4_Sphenopalatine_VS_P3_Lumbar_Coeliac_Stellate	1	1	0	1	0	0	0	1
GAS7	1.67	P1_P2_P4_Sphenopalatine_VS_P3_Lumbar_Coeliac_Stellate	1	1	0	1	0	0	0	1
PEX5L	1.67	P1_P2_P3_P4_Lumbar_Coeliac_Sphenopalatine_VS_Stellate	1	1	1	1	1	1	0	1
EYA1	1.67	P1_P2_P3_Lumbar_Coeliac_Stellate_Sphenopalatine_VS_P4	1	1	1	0	1	1	1	1
KCND2	1.67	P1_P3_P4_Lumbar_Coeliac_Stellate_Sphenopalatine_VS_P2	1	0	1	1	1	1	1	1
CCND2	1.66	P4_VS_P1_P2_P3_Lumbar_Coeliac_Stellate_Sphenopalatine	0	0	0	1	0	0	0	0
FFAR3	1.66	Lumbar_Coeliac_VS_P1_P2_P3_P4_Stellate_Sphenopalatine	0	0	0	0	1	1	0	0
THSD7B	1.66	P1_P2_P4_Lumbar_Coeliac_Stellate_VS_P3_Sphenopalatine	1	1	0	1	1	1	1	0
NPY	1.66	P1_P2_P3_P4_Lumbar_Coeliac_Stellate_VS_Sphenopalatine	1	1	1	1	1	1	1	0
COL12A1	1.66	Sphenopalatine_VS_P1_P2_P3_P4_Lumbar_Coeliac_Stellate	0	0	0	0	0	0	0	1
DSCAM	1.66	P1_P2_P3_P4_Lumbar_Coeliac_Sphenopalatine_VS_Stellate	1	1	1	1	1	1	0	1
LAYN	1.66	P1_P2_P3_Lumbar_Coeliac_Stellate_Sphenopalatine_VS_P4	1	1	1	0	1	1	1	1
ZEB2OS	1.65	P2_VS_P1_P3_P4_Lumbar_Coeliac_Stellate_Sphenopalatine	0	1	0	0	0	0	0	0
SDK2	1.65	P1_P2_P4_Lumbar_VS_P3_Coeliac_Stellate_Sphenopalatine	1	1	0	1	1	0	0	0
ABCC2	1.65	Lumbar_Coeliac_VS_P1_P2_P3_P4_Stellate_Sphenopalatine	0	0	0	0	1	1	0	0
RORC	1.65	P3_Sphenopalatine_VS_P1_P2_P4_Lumbar_Coeliac_Stellate	0	0	1	0	0	0	0	1
CNTN2	1.65	P1_P2_P3_P4_Lumbar_Coeliac_Sphenopalatine_VS_Stellate	1	1	1	1	1	1	0	1
HTR2A	1.64	P2_VS_P1_P3_P4_Lumbar_Coeliac_Stellate_Sphenopalatine	0	1	0	0	0	0	0	0
NPY4R	1.64	P4_VS_P1_P2_P3_Lumbar_Coeliac_Stellate_Sphenopalatine	0	0	0	1	0	0	0	0
PPM1J	1.64	Lumbar_VS_P1_P2_P3_P4_Coeliac_Stellate_Sphenopalatine	0	0	0	0	1	0	0	0
C130073E24RIK	1.64	P3_Lumbar_Coeliac_VS_P1_P2_P4_Stellate_Sphenopalatine	0	0	1	0	1	1	0	0
KCTD16	1.64	P1_P2_P4_Lumbar_Coeliac_Stellate_VS_P3_Sphenopalatine	1	1	0	1	1	1	1	0
ITGA1	1.64	P3_P4_Lumbar_Coeliac_Stellate_VS_P1_P2_Sphenopalatine	0	0	1	1	1	1	1	0
SOX5OS2	1.64	P2_P3_P4_Lumbar_Coeliac_Stellate_VS_P1_Sphenopalatine	0	1	1	1	1	1	1	0
VAV2	1.64	P1_P2_P3_P4_Lumbar_Coeliac_Stellate_VS_Sphenopalatine	1	1	1	1	1	1	1	0
2004-09-01	1.64	P1_P2_P3_Lumbar_Coeliac_Stellate_Sphenopalatine_VS_P4	1	1	1	0	1	1	1	1
FLRT1	1.64	P1_P2_P4_Lumbar_Coeliac_Stellate_Sphenopalatine_VS_P3	1	1	0	1	1	1	1	1
ANGPT2	1.63	P4_VS_P1_P2_P3_Lumbar_Coeliac_Stellate_Sphenopalatine	0	0	0	1	0	0	0	0
ZFP146	1.63	Lumbar_Coeliac_VS_P1_P2_P3_P4_Stellate_Sphenopalatine	0	0	0	0	1	1	0	0
CCNJL	1.63	P3_Lumbar_Coeliac_VS_P1_P2_P4_Stellate_Sphenopalatine	0	0	1	0	1	1	0	0
ZIM1	1.63	Sphenopalatine_VS_P1_P2_P3_P4_Lumbar_Coeliac_Stellate	0	0	0	0	0	0	0	1
ZBTB16	1.63	P4_Sphenopalatine_VS_P1_P2_P3_Lumbar_Coeliac_Stellate	0	0	0	1	0	0	0	1
HBB-BS	1.63	P1_P2_P3_P4_Coeliac_Stellate_Sphenopalatine_VS_Lumbar	1	1	1	1	0	1	1	1
PTGER4	1.62	P1_P2_P4_VS_P3_Lumbar_Coeliac_Stellate_Sphenopalatine	1	1	0	1	0	0	0	0
GM3728	1.62	Lumbar_VS_P1_P2_P3_P4_Coeliac_Stellate_Sphenopalatine	0	0	0	0	1	0	0	0
UNC5D	1.62	P4_Lumbar_VS_P1_P2_P3_Coeliac_Stellate_Sphenopalatine	0	0	0	1	1	0	0	0
TOX3	1.62	P4_Lumbar_VS_P1_P2_P3_Coeliac_Stellate_Sphenopalatine	0	0	0	1	1	0	0	0
PAG1	1.62	P1_P2_P3_P4_Lumbar_Coeliac_Stellate_VS_Sphenopalatine	1	1	1	1	1	1	1	0
AMER2	1.62	P1_P2_P3_P4_Lumbar_Coeliac_Stellate_VS_Sphenopalatine	1	1	1	1	1	1	1	0
CPNE7	1.62	P1_Sphenopalatine_VS_P2_P3_P4_Lumbar_Coeliac_Stellate	1	0	0	0	0	0	0	1
PTGDS	1.62	P3_Sphenopalatine_VS_P1_P2_P4_Lumbar_Coeliac_Stellate	0	0	1	0	0	0	0	1
MFNG	1.62	P3_Sphenopalatine_VS_P1_P2_P4_Lumbar_Coeliac_Stellate	0	0	1	0	0	0	0	1
PBX3	1.62	P1_P2_P4_Lumbar_Coeliac_Sphenopalatine_VS_P3_Stellate	1	1	0	1	1	1	0	1
ST3GAL6	1.62	Lumbar_Coeliac_Stellate_Sphenopalatine_VS_P1_P2_P3_P4	0	0	0	0	1	1	1	1
RASGEF1B	1.62	P1_P4_Lumbar_Coeliac_Stellate_Sphenopalatine_VS_P2_P3	1	0	0	1	1	1	1	1
TM4SF1	1.62	P1_P3_P4_Lumbar_Coeliac_Stellate_Sphenopalatine_VS_P2	1	0	1	1	1	1	1	1
PRSS12	1.61	P1_VS_P2_P3_P4_Lumbar_Coeliac_Stellate_Sphenopalatine	1	0	0	0	0	0	0	0
PIEZO2	1.61	P1_VS_P2_P3_P4_Lumbar_Coeliac_Stellate_Sphenopalatine	1	0	0	0	0	0	0	0
SNCAIP	1.61	P4_VS_P1_P2_P3_Lumbar_Coeliac_Stellate_Sphenopalatine	0	0	0	1	0	0	0	0
GDF5	1.61	P1_P2_P4_VS_P3_Lumbar_Coeliac_Stellate_Sphenopalatine	1	1	0	1	0	0	0	0
CBLN1	1.61	P1_P2_P4_VS_P3_Lumbar_Coeliac_Stellate_Sphenopalatine	1	1	0	1	0	0	0	0
IGSF1	1.61	Lumbar_Coeliac_VS_P1_P2_P3_P4_Stellate_Sphenopalatine	0	0	0	0	1	1	0	0
HMGA1B	1.61	P1_P2_P3_P4_Stellate_Sphenopalatine_VS_Lumbar_Coeliac	1	1	1	1	0	0	1	1
1500009C09RIK	1.61	P1_P2_P3_Lumbar_Coeliac_Stellate_Sphenopalatine_VS_P4	1	1	1	0	1	1	1	1
LRRTM1	1.6	P4_VS_P1_P2_P3_Lumbar_Coeliac_Stellate_Sphenopalatine	0	0	0	1	0	0	0	0
LRRTM3	1.6	P4_VS_P1_P2_P3_Lumbar_Coeliac_Stellate_Sphenopalatine	0	0	0	1	0	0	0	0
TMEM132E	1.6	P1_P2_P3_P4_VS_Lumbar_Coeliac_Stellate_Sphenopalatine	1	1	1	1	0	0	0	0
KLHL11	1.6	P1_P2_P3_P4_Lumbar_Coeliac_VS_Stellate_Sphenopalatine	1	1	1	1	1	1	0	0
GOLM1	1.6	P1_P2_P3_P4_Lumbar_Coeliac_Stellate_VS_Sphenopalatine	1	1	1	1	1	1	1	0
KY	1.6	Sphenopalatine_VS_P1_P2_P3_P4_Lumbar_Coeliac_Stellate	0	0	0	0	0	0	0	1
DAZL	1.59	P1_P3_VS_P2_P4_Lumbar_Coeliac_Stellate_Sphenopalatine	1	0	1	0	0	0	0	0
TBC1D1	1.59	P4_VS_P1_P2_P3_Lumbar_Coeliac_Stellate_Sphenopalatine	0	0	0	1	0	0	0	0
GM16070	1.59	Lumbar_VS_P1_P2_P3_P4_Coeliac_Stellate_Sphenopalatine	0	0	0	0	1	0	0	0
KLHL29	1.59	Lumbar_Coeliac_VS_P1_P2_P3_P4_Stellate_Sphenopalatine	0	0	0	0	1	1	0	0
PTGER2	1.59	Sphenopalatine_VS_P1_P2_P3_P4_Lumbar_Coeliac_Stellate	0	0	0	0	0	0	0	1
GFRA1	1.59	P1_Sphenopalatine_VS_P2_P3_P4_Lumbar_Coeliac_Stellate	1	0	0	0	0	0	0	1
KCNA4	1.59	P1_P2_P4_Sphenopalatine_VS_P3_Lumbar_Coeliac_Stellate	1	1	0	1	0	0	0	1
HTR4	1.58	P4_VS_P1_P2_P3_Lumbar_Coeliac_Stellate_Sphenopalatine	0	0	0	1	0	0	0	0
PRELID2	1.58	Lumbar_Coeliac_VS_P1_P2_P3_P4_Stellate_Sphenopalatine	0	0	0	0	1	1	0	0
LHFP	1.58	Sphenopalatine_VS_P1_P2_P3_P4_Lumbar_Coeliac_Stellate	0	0	0	0	0	0	0	1
RADX	1.58	Sphenopalatine_VS_P1_P2_P3_P4_Lumbar_Coeliac_Stellate	0	0	0	0	0	0	0	1
9330158H04RIK	1.58	P1_P3_P4_Lumbar_Coeliac_Stellate_Sphenopalatine_VS_P2	1	0	1	1	1	1	1	1
ACKR3	1.57	P2_VS_P1_P3_P4_Lumbar_Coeliac_Stellate_Sphenopalatine	0	1	0	0	0	0	0	0
CHRM3	1.57	P1_P2_P3_VS_P4_Lumbar_Coeliac_Stellate_Sphenopalatine	1	1	1	0	0	0	0	0
FCMR	1.57	P4_VS_P1_P2_P3_Lumbar_Coeliac_Stellate_Sphenopalatine	0	0	0	1	0	0	0	0
GASK1B	1.57	P4_VS_P1_P2_P3_Lumbar_Coeliac_Stellate_Sphenopalatine	0	0	0	1	0	0	0	0
GM40383	1.57	P4_VS_P1_P2_P3_Lumbar_Coeliac_Stellate_Sphenopalatine	0	0	0	1	0	0	0	0
RRAGB	1.57	Lumbar_Coeliac_VS_P1_P2_P3_P4_Stellate_Sphenopalatine	0	0	0	0	1	1	0	0
CDH8	1.57	P1_Lumbar_Coeliac_VS_P2_P3_P4_Stellate_Sphenopalatine	1	0	0	0	1	1	0	0
MKX	1.57	Sphenopalatine_VS_P1_P2_P3_P4_Lumbar_Coeliac_Stellate	0	0	0	0	0	0	0	1
KLF3	1.57	P1_P2_P3_P4_Lumbar_Coeliac_Sphenopalatine_VS_Stellate	1	1	1	1	1	1	0	1
LUZP2	1.56	P4_VS_P1_P2_P3_Lumbar_Coeliac_Stellate_Sphenopalatine	0	0	0	1	0	0	0	0
XKR6	1.56	P1_P2_P3_P4_Lumbar_Coeliac_VS_Stellate_Sphenopalatine	1	1	1	1	1	1	0	0
PHACTR2	1.56	P1_P2_P3_P4_Lumbar_Coeliac_Stellate_VS_Sphenopalatine	1	1	1	1	1	1	1	0
DLK1	1.56	Sphenopalatine_VS_P1_P2_P3_P4_Lumbar_Coeliac_Stellate	0	0	0	0	0	0	0	1
EPB41L4A	1.56	P1_P2_P4_Lumbar_Coeliac_Stellate_Sphenopalatine_VS_P3	1	1	0	1	1	1	1	1
S100B	1.55	P4_VS_P1_P2_P3_Lumbar_Coeliac_Stellate_Sphenopalatine	0	0	0	1	0	0	0	0
NTN4	1.55	Lumbar_VS_P1_P2_P3_P4_Coeliac_Stellate_Sphenopalatine	0	0	0	0	1	0	0	0
HIST1H2AE	1.55	Coeliac_VS_P1_P2_P3_P4_Lumbar_Stellate_Sphenopalatine	0	0	0	0	0	1	0	0
IFI27L2A	1.55	Sphenopalatine_VS_P1_P2_P3_P4_Lumbar_Coeliac_Stellate	0	0	0	0	0	0	0	1
GPR50	1.55	Sphenopalatine_VS_P1_P2_P3_P4_Lumbar_Coeliac_Stellate	0	0	0	0	0	0	0	1
KLF4	1.55	P1_P2_P3_P4_Lumbar_Coeliac_Sphenopalatine_VS_Stellate	1	1	1	1	1	1	0	1
TRIL	1.55	P1_P3_P4_Lumbar_Coeliac_Stellate_Sphenopalatine_VS_P2	1	0	1	1	1	1	1	1
DACT1	1.54	P1_VS_P2_P3_P4_Lumbar_Coeliac_Stellate_Sphenopalatine	1	0	0	0	0	0	0	0
GM17634	1.54	P4_VS_P1_P2_P3_Lumbar_Coeliac_Stellate_Sphenopalatine	0	0	0	1	0	0	0	0
S100A13	1.54	P1_P2_P3_P4_Lumbar_Coeliac_Stellate_VS_Sphenopalatine	1	1	1	1	1	1	1	0
RBP1	1.54	P1_P4_Sphenopalatine_VS_P2_P3_Lumbar_Coeliac_Stellate	1	0	0	1	0	0	0	1
EDIL3	1.54	P1_P4_Sphenopalatine_VS_P2_P3_Lumbar_Coeliac_Stellate	1	0	0	1	0	0	0	1
ASTN2	1.54	P1_P2_P3_P4_Lumbar_Coeliac_Sphenopalatine_VS_Stellate	1	1	1	1	1	1	0	1
ONECUT2	1.54	P1_P2_P4_Lumbar_Coeliac_Stellate_Sphenopalatine_VS_P3	1	1	0	1	1	1	1	1
ELMOD1	1.54	P1_P3_P4_Lumbar_Coeliac_Stellate_Sphenopalatine_VS_P2	1	0	1	1	1	1	1	1
F730043M19RIK	1.53	P2_P3_VS_P1_P4_Lumbar_Coeliac_Stellate_Sphenopalatine	0	1	1	0	0	0	0	0
GM20501	1.53	P4_VS_P1_P2_P3_Lumbar_Coeliac_Stellate_Sphenopalatine	0	0	0	1	0	0	0	0
ADRB3	1.53	P4_VS_P1_P2_P3_Lumbar_Coeliac_Stellate_Sphenopalatine	0	0	0	1	0	0	0	0
SGCZ	1.53	Lumbar_Coeliac_VS_P1_P2_P3_P4_Stellate_Sphenopalatine	0	0	0	0	1	1	0	0
CASK	1.53	P1_P2_P3_P4_Lumbar_Coeliac_Stellate_VS_Sphenopalatine	1	1	1	1	1	1	1	0
FN1	1.53	Sphenopalatine_VS_P1_P2_P3_P4_Lumbar_Coeliac_Stellate	0	0	0	0	0	0	0	1
ITIH5	1.52	P2_VS_P1_P3_P4_Lumbar_Coeliac_Stellate_Sphenopalatine	0	1	0	0	0	0	0	0
CAR12	1.52	P3_VS_P1_P2_P4_Lumbar_Coeliac_Stellate_Sphenopalatine	0	0	1	0	0	0	0	0
RGCC	1.52	P4_VS_P1_P2_P3_Lumbar_Coeliac_Stellate_Sphenopalatine	0	0	0	1	0	0	0	0
H2-EB1	1.52	P4_VS_P1_P2_P3_Lumbar_Coeliac_Stellate_Sphenopalatine	0	0	0	1	0	0	0	0
DDR2	1.52	P1_P2_P4_VS_P3_Lumbar_Coeliac_Stellate_Sphenopalatine	1	1	0	1	0	0	0	0
NLRP6	1.52	Lumbar_Coeliac_VS_P1_P2_P3_P4_Stellate_Sphenopalatine	0	0	0	0	1	1	0	0
FAM43A	1.52	P1_P2_P3_P4_Lumbar_Coeliac_Stellate_VS_Sphenopalatine	1	1	1	1	1	1	1	0
ASB2	1.52	Sphenopalatine_VS_P1_P2_P3_P4_Lumbar_Coeliac_Stellate	0	0	0	0	0	0	0	1
PKIB	1.51	P2_VS_P1_P3_P4_Lumbar_Coeliac_Stellate_Sphenopalatine	0	1	0	0	0	0	0	0
B230312C02RIK	1.51	P3_VS_P1_P2_P4_Lumbar_Coeliac_Stellate_Sphenopalatine	0	0	1	0	0	0	0	0
HOTAIR	1.51	P4_VS_P1_P2_P3_Lumbar_Coeliac_Stellate_Sphenopalatine	0	0	0	1	0	0	0	0
GM29771	1.51	P2_P4_VS_P1_P3_Lumbar_Coeliac_Stellate_Sphenopalatine	0	1	0	1	0	0	0	0
NID1	1.51	P1_P2_P4_VS_P3_Lumbar_Coeliac_Stellate_Sphenopalatine	1	1	0	1	0	0	0	0
WWC1	1.51	Lumbar_Coeliac_VS_P1_P2_P3_P4_Stellate_Sphenopalatine	0	0	0	0	1	1	0	0
TMEM100	1.51	P1_Sphenopalatine_VS_P2_P3_P4_Lumbar_Coeliac_Stellate	1	0	0	0	0	0	0	1
HBB-BT	1.51	P1_P2_P3_P4_Sphenopalatine_VS_Lumbar_Coeliac_Stellate	1	1	1	1	0	0	0	1
HCN2	1.51	P1_P2_P3_P4_Lumbar_Coeliac_Sphenopalatine_VS_Stellate	1	1	1	1	1	1	0	1
TPD52L1	1.51	P3_Lumbar_Coeliac_Stellate_Sphenopalatine_VS_P1_P2_P4	0	0	1	0	1	1	1	1
PRKG2	1.51	P1_P3_Lumbar_Coeliac_Stellate_Sphenopalatine_VS_P2_P4	1	0	1	0	1	1	1	1
TMEM200C	1.5	P4_VS_P1_P2_P3_Lumbar_Coeliac_Stellate_Sphenopalatine	0	0	0	1	0	0	0	0
ARAP2	1.5	Sphenopalatine_VS_P1_P2_P3_P4_Lumbar_Coeliac_Stellate	0	0	0	0	0	0	0	1
RGS7BP	1.5	P1_P3_P4_Lumbar_Coeliac_Stellate_Sphenopalatine_VS_P2	1	0	1	1	1	1	1	1
CCN3	1.5	P1_P3_P4_Lumbar_Coeliac_Stellate_Sphenopalatine_VS_P2	1	0	1	1	1	1	1	1
SEMA3D	1.49	P3_VS_P1_P2_P4_Lumbar_Coeliac_Stellate_Sphenopalatine	0	0	1	0	0	0	0	0
OOEP	1.49	Lumbar_VS_P1_P2_P3_P4_Coeliac_Stellate_Sphenopalatine	0	0	0	0	1	0	0	0
ST8SIA4	1.49	P1_P3_P4_Lumbar_Coeliac_Stellate_VS_P2_Sphenopalatine	1	0	1	1	1	1	1	0
EPHX1	1.49	P1_P2_P3_P4_Lumbar_Coeliac_Stellate_VS_Sphenopalatine	1	1	1	1	1	1	1	0
PPARGC1A	1.49	Sphenopalatine_VS_P1_P2_P3_P4_Lumbar_Coeliac_Stellate	0	0	0	0	0	0	0	1
TCF7L2	1.49	Sphenopalatine_VS_P1_P2_P3_P4_Lumbar_Coeliac_Stellate	0	0	0	0	0	0	0	1
PELI2	1.49	P2_Sphenopalatine_VS_P1_P3_P4_Lumbar_Coeliac_Stellate	0	1	0	0	0	0	0	1
GFRA2	1.49	P1_P2_P4_Sphenopalatine_VS_P3_Lumbar_Coeliac_Stellate	1	1	0	1	0	0	0	1
COL14A1	1.48	P4_VS_P1_P2_P3_Lumbar_Coeliac_Stellate_Sphenopalatine	0	0	0	1	0	0	0	0
KCNV1	1.48	P1_P3_P4_VS_P2_Lumbar_Coeliac_Stellate_Sphenopalatine	1	0	1	1	0	0	0	0
TSPAN2OS	1.48	Lumbar_Coeliac_Stellate_VS_P1_P2_P3_P4_Sphenopalatine	0	0	0	0	1	1	1	0
AMMECR1	1.48	P1_P2_P3_P4_Lumbar_Coeliac_Stellate_VS_Sphenopalatine	1	1	1	1	1	1	1	0
NFIA	1.48	P1_P2_P4_Sphenopalatine_VS_P3_Lumbar_Coeliac_Stellate	1	1	0	1	0	0	0	1
RERG	1.48	P1_P2_P3_P4_Sphenopalatine_VS_Lumbar_Coeliac_Stellate	1	1	1	1	0	0	0	1
NPAS3	1.48	Lumbar_Sphenopalatine_VS_P1_P2_P3_P4_Coeliac_Stellate	0	0	0	0	1	0	0	1
AK4	1.48	P1_P2_P3_P4_Lumbar_Coeliac_Sphenopalatine_VS_Stellate	1	1	1	1	1	1	0	1
LARP6	1.48	P1_P2_P3_P4_Lumbar_Coeliac_Sphenopalatine_VS_Stellate	1	1	1	1	1	1	0	1
CHODL	1.48	P1_P2_P4_Lumbar_Coeliac_Stellate_Sphenopalatine_VS_P3	1	1	0	1	1	1	1	1
NOTCH1	1.47	P4_VS_P1_P2_P3_Lumbar_Coeliac_Stellate_Sphenopalatine	0	0	0	1	0	0	0	0
FOXD3	1.47	P4_VS_P1_P2_P3_Lumbar_Coeliac_Stellate_Sphenopalatine	0	0	0	1	0	0	0	0
RADIL	1.47	P4_VS_P1_P2_P3_Lumbar_Coeliac_Stellate_Sphenopalatine	0	0	0	1	0	0	0	0
MIR99AHG	1.47	P3_P4_VS_P1_P2_Lumbar_Coeliac_Stellate_Sphenopalatine	0	0	1	1	0	0	0	0
LRRC36	1.47	Lumbar_VS_P1_P2_P3_P4_Coeliac_Stellate_Sphenopalatine	0	0	0	0	1	0	0	0
ADRA2B	1.47	Lumbar_Coeliac_Stellate_VS_P1_P2_P3_P4_Sphenopalatine	0	0	0	0	1	1	1	0
SPATA13	1.47	P3_Lumbar_Coeliac_Stellate_VS_P1_P2_P4_Sphenopalatine	0	0	1	0	1	1	1	0
AC109619.1	1.47	P1_P2_P4_Lumbar_Coeliac_Stellate_Sphenopalatine_VS_P3	1	1	0	1	1	1	1	1
NRP1	1.47	P1_P3_P4_Lumbar_Coeliac_Stellate_Sphenopalatine_VS_P2	1	0	1	1	1	1	1	1
ALDH1L1	1.46	P2_VS_P1_P3_P4_Lumbar_Coeliac_Stellate_Sphenopalatine	0	1	0	0	0	0	0	0
IRS1	1.46	P3_VS_P1_P2_P4_Lumbar_Coeliac_Stellate_Sphenopalatine	0	0	1	0	0	0	0	0
EPHX2	1.46	P3_VS_P1_P2_P4_Lumbar_Coeliac_Stellate_Sphenopalatine	0	0	1	0	0	0	0	0
CDHR2	1.46	P4_VS_P1_P2_P3_Lumbar_Coeliac_Stellate_Sphenopalatine	0	0	0	1	0	0	0	0
MATN2	1.46	P4_VS_P1_P2_P3_Lumbar_Coeliac_Stellate_Sphenopalatine	0	0	0	1	0	0	0	0
GM5535	1.46	Coeliac_VS_P1_P2_P3_P4_Lumbar_Stellate_Sphenopalatine	0	0	0	0	0	1	0	0
NCK2	1.46	Lumbar_Coeliac_VS_P1_P2_P3_P4_Stellate_Sphenopalatine	0	0	0	0	1	1	0	0
GM38085	1.46	Lumbar_Coeliac_VS_P1_P2_P3_P4_Stellate_Sphenopalatine	0	0	0	0	1	1	0	0
CHD7	1.46	P3_Lumbar_Coeliac_VS_P1_P2_P4_Stellate_Sphenopalatine	0	0	1	0	1	1	0	0
SYNC	1.46	P1_P2_P3_P4_Lumbar_Coeliac_VS_Stellate_Sphenopalatine	1	1	1	1	1	1	0	0
PTPN3	1.46	P1_P2_P3_P4_Sphenopalatine_VS_Lumbar_Coeliac_Stellate	1	1	1	1	0	0	0	1
KSR2	1.46	P1_P2_P3_P4_Lumbar_Coeliac_Sphenopalatine_VS_Stellate	1	1	1	1	1	1	0	1
MGAT5B	1.46	P1_P2_P3_P4_Lumbar_Coeliac_Sphenopalatine_VS_Stellate	1	1	1	1	1	1	0	1
AREG	1.45	P1_VS_P2_P3_P4_Lumbar_Coeliac_Stellate_Sphenopalatine	1	0	0	0	0	0	0	0
SLC43A3	1.45	P4_VS_P1_P2_P3_Lumbar_Coeliac_Stellate_Sphenopalatine	0	0	0	1	0	0	0	0
EDN3	1.45	P4_VS_P1_P2_P3_Lumbar_Coeliac_Stellate_Sphenopalatine	0	0	0	1	0	0	0	0
A330048O09RIK	1.45	P4_VS_P1_P2_P3_Lumbar_Coeliac_Stellate_Sphenopalatine	0	0	0	1	0	0	0	0
LDLRAD4	1.45	P4_VS_P1_P2_P3_Lumbar_Coeliac_Stellate_Sphenopalatine	0	0	0	1	0	0	0	0
SETBP1	1.45	P4_VS_P1_P2_P3_Lumbar_Coeliac_Stellate_Sphenopalatine	0	0	0	1	0	0	0	0
ANKRD44	1.45	P2_P4_VS_P1_P3_Lumbar_Coeliac_Stellate_Sphenopalatine	0	1	0	1	0	0	0	0
GPR179	1.45	P3_Coeliac_VS_P1_P2_P4_Lumbar_Stellate_Sphenopalatine	0	0	1	0	0	1	0	0
PABPC5	1.45	Lumbar_Coeliac_VS_P1_P2_P3_P4_Stellate_Sphenopalatine	0	0	0	0	1	1	0	0
TGFA	1.45	P3_Lumbar_Coeliac_Stellate_VS_P1_P2_P4_Sphenopalatine	0	0	1	0	1	1	1	0
GALNT9	1.45	Sphenopalatine_VS_P1_P2_P3_P4_Lumbar_Coeliac_Stellate	0	0	0	0	0	0	0	1
CEP112	1.45	Sphenopalatine_VS_P1_P2_P3_P4_Lumbar_Coeliac_Stellate	0	0	0	0	0	0	0	1
CLSTN3	1.45	P1_P2_P3_P4_Lumbar_Coeliac_Sphenopalatine_VS_Stellate	1	1	1	1	1	1	0	1
FRRS1	1.44	Lumbar_Coeliac_VS_P1_P2_P3_P4_Stellate_Sphenopalatine	0	0	0	0	1	1	0	0
MT-ND6	1.44	Lumbar_Coeliac_VS_P1_P2_P3_P4_Stellate_Sphenopalatine	0	0	0	0	1	1	0	0
BTBD3	1.44	P1_P2_P3_P4_Lumbar_Coeliac_VS_Stellate_Sphenopalatine	1	1	1	1	1	1	0	0
PTGS1	1.44	P3_Lumbar_Coeliac_Stellate_VS_P1_P2_P4_Sphenopalatine	0	0	1	0	1	1	1	0
MYCN	1.44	P3_Lumbar_Coeliac_Stellate_VS_P1_P2_P4_Sphenopalatine	0	0	1	0	1	1	1	0
SCN5A	1.44	Sphenopalatine_VS_P1_P2_P3_P4_Lumbar_Coeliac_Stellate	0	0	0	0	0	0	0	1
LY6E	1.44	P1_P2_P3_P4_Coeliac_Sphenopalatine_VS_Lumbar_Stellate	1	1	1	1	0	1	0	1
CACNA1C	1.44	P1_P2_P3_P4_Lumbar_Coeliac_Sphenopalatine_VS_Stellate	1	1	1	1	1	1	0	1
GM30003	1.43	P2_VS_P1_P3_P4_Lumbar_Coeliac_Stellate_Sphenopalatine	0	1	0	0	0	0	0	0
RBM8A2	1.43	P4_VS_P1_P2_P3_Lumbar_Coeliac_Stellate_Sphenopalatine	0	0	0	1	0	0	0	0
6530402F18RIK	1.43	P4_VS_P1_P2_P3_Lumbar_Coeliac_Stellate_Sphenopalatine	0	0	0	1	0	0	0	0
METRN	1.43	P4_VS_P1_P2_P3_Lumbar_Coeliac_Stellate_Sphenopalatine	0	0	0	1	0	0	0	0
PTGFRN	1.43	P2_P4_VS_P1_P3_Lumbar_Coeliac_Stellate_Sphenopalatine	0	1	0	1	0	0	0	0
CYP2S1	1.43	Sphenopalatine_VS_P1_P2_P3_P4_Lumbar_Coeliac_Stellate	0	0	0	0	0	0	0	1
LYNX1	1.43	P1_P2_Sphenopalatine_VS_P3_P4_Lumbar_Coeliac_Stellate	1	1	0	0	0	0	0	1
SELENOV	1.43	P1_P2_P3_P4_Sphenopalatine_VS_Lumbar_Coeliac_Stellate	1	1	1	1	0	0	0	1
MAGI3	1.43	P1_P2_P3_P4_Lumbar_Coeliac_Sphenopalatine_VS_Stellate	1	1	1	1	1	1	0	1
ANO8	1.43	P1_P2_P3_P4_Lumbar_Coeliac_Sphenopalatine_VS_Stellate	1	1	1	1	1	1	0	1
ADCY5	1.43	P1_P2_P3_P4_Lumbar_Coeliac_Sphenopalatine_VS_Stellate	1	1	1	1	1	1	0	1
NAV2	1.42	P2_VS_P1_P3_P4_Lumbar_Coeliac_Stellate_Sphenopalatine	0	1	0	0	0	0	0	0
A330084C13RIK	1.42	P1_P2_VS_P3_P4_Lumbar_Coeliac_Stellate_Sphenopalatine	1	1	0	0	0	0	0	0
AI593442	1.42	P4_VS_P1_P2_P3_Lumbar_Coeliac_Stellate_Sphenopalatine	0	0	0	1	0	0	0	0
ERBB3	1.42	P4_VS_P1_P2_P3_Lumbar_Coeliac_Stellate_Sphenopalatine	0	0	0	1	0	0	0	0
VWA7	1.42	P4_VS_P1_P2_P3_Lumbar_Coeliac_Stellate_Sphenopalatine	0	0	0	1	0	0	0	0
SPON1	1.42	Sphenopalatine_VS_P1_P2_P3_P4_Lumbar_Coeliac_Stellate	0	0	0	0	0	0	0	1
KCND3	1.41	P2_VS_P1_P3_P4_Lumbar_Coeliac_Stellate_Sphenopalatine	0	1	0	0	0	0	0	0
SLC35F1	1.41	P3_VS_P1_P2_P4_Lumbar_Coeliac_Stellate_Sphenopalatine	0	0	1	0	0	0	0	0
AEBP1	1.41	P3_VS_P1_P2_P4_Lumbar_Coeliac_Stellate_Sphenopalatine	0	0	1	0	0	0	0	0
DIAPH3	1.41	P3_VS_P1_P2_P4_Lumbar_Coeliac_Stellate_Sphenopalatine	0	0	1	0	0	0	0	0
EFHD1	1.41	P4_VS_P1_P2_P3_Lumbar_Coeliac_Stellate_Sphenopalatine	0	0	0	1	0	0	0	0
TNR	1.41	P1_P2_P3_P4_VS_Lumbar_Coeliac_Stellate_Sphenopalatine	1	1	1	1	0	0	0	0
GM5136	1.41	P1_P2_P3_P4_Lumbar_Coeliac_Stellate_VS_Sphenopalatine	1	1	1	1	1	1	1	0
NELL2	1.41	P1_Sphenopalatine_VS_P2_P3_P4_Lumbar_Coeliac_Stellate	1	0	0	0	0	0	0	1
PHLDA1	1.41	P1_P2_P3_P4_Sphenopalatine_VS_Lumbar_Coeliac_Stellate	1	1	1	1	0	0	0	1
PDPN	1.4	P1_VS_P2_P3_P4_Lumbar_Coeliac_Stellate_Sphenopalatine	1	0	0	0	0	0	0	0
GM48992	1.4	P1_VS_P2_P3_P4_Lumbar_Coeliac_Stellate_Sphenopalatine	1	0	0	0	0	0	0	0
PHF21B	1.4	P1_VS_P2_P3_P4_Lumbar_Coeliac_Stellate_Sphenopalatine	1	0	0	0	0	0	0	0
ARHGAP29	1.4	P1_P2_VS_P3_P4_Lumbar_Coeliac_Stellate_Sphenopalatine	1	1	0	0	0	0	0	0
FRMPD3	1.4	P4_VS_P1_P2_P3_Lumbar_Coeliac_Stellate_Sphenopalatine	0	0	0	1	0	0	0	0
C230038L03RIK	1.4	Lumbar_VS_P1_P2_P3_P4_Coeliac_Stellate_Sphenopalatine	0	0	0	0	1	0	0	0
STRA6	1.4	P3_Lumbar_Coeliac_VS_P1_P2_P4_Stellate_Sphenopalatine	0	0	1	0	1	1	0	0
FAM177A	1.4	P4_Lumbar_Coeliac_VS_P1_P2_P3_Stellate_Sphenopalatine	0	0	0	1	1	1	0	0
ARNT2	1.4	P1_P2_P3_P4_Lumbar_Coeliac_Stellate_VS_Sphenopalatine	1	1	1	1	1	1	1	0
TSPAN2	1.4	P1_P2_P3_P4_Lumbar_Coeliac_Sphenopalatine_VS_Stellate	1	1	1	1	1	1	0	1
TMC3	1.4	P1_P3_P4_Lumbar_Coeliac_Stellate_Sphenopalatine_VS_P2	1	0	1	1	1	1	1	1
MAP3K20	1.39	P4_VS_P1_P2_P3_Lumbar_Coeliac_Stellate_Sphenopalatine	0	0	0	1	0	0	0	0
PLATR14	1.39	P4_VS_P1_P2_P3_Lumbar_Coeliac_Stellate_Sphenopalatine	0	0	0	1	0	0	0	0
ELFN1	1.39	P2_P3_P4_VS_P1_Lumbar_Coeliac_Stellate_Sphenopalatine	0	1	1	1	0	0	0	0
ACAD10	1.39	Coeliac_VS_P1_P2_P3_P4_Lumbar_Stellate_Sphenopalatine	0	0	0	0	0	1	0	0
ZFP384	1.39	Lumbar_Coeliac_VS_P1_P2_P3_P4_Stellate_Sphenopalatine	0	0	0	0	1	1	0	0
ZFP609	1.39	Lumbar_Coeliac_VS_P1_P2_P3_P4_Stellate_Sphenopalatine	0	0	0	0	1	1	0	0
A630089N07RIK	1.39	Lumbar_Coeliac_VS_P1_P2_P3_P4_Stellate_Sphenopalatine	0	0	0	0	1	1	0	0
PLK2	1.39	P1_P3_Lumbar_Coeliac_Stellate_VS_P2_P4_Sphenopalatine	1	0	1	0	1	1	1	0
MCTP1	1.39	P1_P2_P3_P4_Lumbar_Coeliac_Stellate_VS_Sphenopalatine	1	1	1	1	1	1	1	0
NECAB1	1.39	P1_P2_P3_P4_Lumbar_Coeliac_Sphenopalatine_VS_Stellate	1	1	1	1	1	1	0	1
WTIP	1.39	P1_P2_P3_P4_Lumbar_Coeliac_Sphenopalatine_VS_Stellate	1	1	1	1	1	1	0	1
RGS3	1.39	P1_P2_P3_Lumbar_Coeliac_Stellate_Sphenopalatine_VS_P4	1	1	1	0	1	1	1	1
PTPRU	1.38	P4_VS_P1_P2_P3_Lumbar_Coeliac_Stellate_Sphenopalatine	0	0	0	1	0	0	0	0
A930012L18RIK	1.38	P1_P2_P4_VS_P3_Lumbar_Coeliac_Stellate_Sphenopalatine	1	1	0	1	0	0	0	0
ZFP955A	1.38	Lumbar_Coeliac_VS_P1_P2_P3_P4_Stellate_Sphenopalatine	0	0	0	0	1	1	0	0
OTUD7A	1.38	P1_P2_P3_P4_Lumbar_Coeliac_VS_Stellate_Sphenopalatine	1	1	1	1	1	1	0	0
RAPSN	1.38	Lumbar_Coeliac_Stellate_VS_P1_P2_P3_P4_Sphenopalatine	0	0	0	0	1	1	1	0
GM15688	1.38	Sphenopalatine_VS_P1_P2_P3_P4_Lumbar_Coeliac_Stellate	0	0	0	0	0	0	0	1
GRIK2	1.38	P1_P2_P3_P4_Lumbar_Coeliac_Sphenopalatine_VS_Stellate	1	1	1	1	1	1	0	1
ADAMTS5	1.38	P1_P2_P3_P4_Coeliac_Stellate_Sphenopalatine_VS_Lumbar	1	1	1	1	0	1	1	1
CPNE5	1.38	P1_P2_P3_Lumbar_Coeliac_Stellate_Sphenopalatine_VS_P4	1	1	1	0	1	1	1	1
NKD1	1.37	P2_VS_P1_P3_P4_Lumbar_Coeliac_Stellate_Sphenopalatine	0	1	0	0	0	0	0	0
UNC5B	1.37	P1_P2_P3_Lumbar_Coeliac_VS_P4_Stellate_Sphenopalatine	1	1	1	0	1	1	0	0
SEMA3C	1.37	P1_P2_P3_P4_Lumbar_Coeliac_Stellate_VS_Sphenopalatine	1	1	1	1	1	1	1	0
P2RX2	1.37	P1_P2_P3_P4_Sphenopalatine_VS_Lumbar_Coeliac_Stellate	1	1	1	1	0	0	0	1
TBX3OS1	1.37	P1_P2_P3_Coeliac_Sphenopalatine_VS_P4_Lumbar_Stellate	1	1	1	0	0	1	0	1
SLC4A4	1.37	P1_P2_Lumbar_Coeliac_Sphenopalatine_VS_P3_P4_Stellate	1	1	0	0	1	1	0	1
HFM1	1.36	P4_VS_P1_P2_P3_Lumbar_Coeliac_Stellate_Sphenopalatine	0	0	0	1	0	0	0	0
APH1C	1.36	P4_VS_P1_P2_P3_Lumbar_Coeliac_Stellate_Sphenopalatine	0	0	0	1	0	0	0	0
SLITRK5	1.36	P1_P4_VS_P2_P3_Lumbar_Coeliac_Stellate_Sphenopalatine	1	0	0	1	0	0	0	0
ATP8B2	1.36	Lumbar_Coeliac_VS_P1_P2_P3_P4_Stellate_Sphenopalatine	0	0	0	0	1	1	0	0
GPR68	1.36	P3_Lumbar_Coeliac_VS_P1_P2_P4_Stellate_Sphenopalatine	0	0	1	0	1	1	0	0
LZTS3	1.36	P1_P2_P3_P4_Lumbar_Coeliac_VS_Stellate_Sphenopalatine	1	1	1	1	1	1	0	0
A230006K03RIK	1.36	P1_P2_P4_Lumbar_Coeliac_Sphenopalatine_VS_P3_Stellate	1	1	0	1	1	1	0	1
CACNA2D3	1.36	P2_Lumbar_Coeliac_Stellate_Sphenopalatine_VS_P1_P3_P4	0	1	0	0	1	1	1	1
TMEM44	1.36	P1_P2_P3_Lumbar_Coeliac_Stellate_Sphenopalatine_VS_P4	1	1	1	0	1	1	1	1
LRAT	1.35	P4_VS_P1_P2_P3_Lumbar_Coeliac_Stellate_Sphenopalatine	0	0	0	1	0	0	0	0
STON2	1.35	P4_VS_P1_P2_P3_Lumbar_Coeliac_Stellate_Sphenopalatine	0	0	0	1	0	0	0	0
CSMD3	1.35	P4_VS_P1_P2_P3_Lumbar_Coeliac_Stellate_Sphenopalatine	0	0	0	1	0	0	0	0
TMEM255A	1.35	P4_VS_P1_P2_P3_Lumbar_Coeliac_Stellate_Sphenopalatine	0	0	0	1	0	0	0	0
CHRNA7	1.35	Coeliac_VS_P1_P2_P3_P4_Lumbar_Stellate_Sphenopalatine	0	0	0	0	0	1	0	0
DPY19L1	1.35	P1_P2_P3_P4_Lumbar_Coeliac_Stellate_VS_Sphenopalatine	1	1	1	1	1	1	1	0
CMBL	1.35	P1_P2_P3_P4_Lumbar_Coeliac_Stellate_VS_Sphenopalatine	1	1	1	1	1	1	1	0
IGF2BP2	1.35	P1_P2_P3_P4_Sphenopalatine_VS_Lumbar_Coeliac_Stellate	1	1	1	1	0	0	0	1
FOSB	1.35	P1_P2_P3_P4_Lumbar_Coeliac_Sphenopalatine_VS_Stellate	1	1	1	1	1	1	0	1
TPBGL	1.35	P1_P2_P3_P4_Lumbar_Stellate_Sphenopalatine_VS_Coeliac	1	1	1	1	1	0	1	1
GM43445	1.34	P1_VS_P2_P3_P4_Lumbar_Coeliac_Stellate_Sphenopalatine	1	0	0	0	0	0	0	0
AR	1.34	P3_VS_P1_P2_P4_Lumbar_Coeliac_Stellate_Sphenopalatine	0	0	1	0	0	0	0	0
IGFBP7	1.34	P1_P2_P3_VS_P4_Lumbar_Coeliac_Stellate_Sphenopalatine	1	1	1	0	0	0	0	0
TRIM16	1.34	P4_VS_P1_P2_P3_Lumbar_Coeliac_Stellate_Sphenopalatine	0	0	0	1	0	0	0	0
ZCCHC24	1.34	P4_VS_P1_P2_P3_Lumbar_Coeliac_Stellate_Sphenopalatine	0	0	0	1	0	0	0	0
TIAM2	1.34	P2_P4_VS_P1_P3_Lumbar_Coeliac_Stellate_Sphenopalatine	0	1	0	1	0	0	0	0
ZFP84	1.34	Lumbar_Coeliac_VS_P1_P2_P3_P4_Stellate_Sphenopalatine	0	0	0	0	1	1	0	0
GALNT6	1.34	Lumbar_Coeliac_VS_P1_P2_P3_P4_Stellate_Sphenopalatine	0	0	0	0	1	1	0	0
VWC2L	1.34	P4_Lumbar_Coeliac_VS_P1_P2_P3_Stellate_Sphenopalatine	0	0	0	1	1	1	0	0
BRINP2	1.34	P3_Lumbar_Coeliac_Stellate_VS_P1_P2_P4_Sphenopalatine	0	0	1	0	1	1	1	0
ENOX2	1.33	P4_VS_P1_P2_P3_Lumbar_Coeliac_Stellate_Sphenopalatine	0	0	0	1	0	0	0	0
PLCB1	1.33	Sphenopalatine_VS_P1_P2_P3_P4_Lumbar_Coeliac_Stellate	0	0	0	0	0	0	0	1
INSYN2B	1.33	P1_Sphenopalatine_VS_P2_P3_P4_Lumbar_Coeliac_Stellate	1	0	0	0	0	0	0	1
IER5L	1.33	P1_P2_P3_P4_Lumbar_Coeliac_Sphenopalatine_VS_Stellate	1	1	1	1	1	1	0	1
9130008F23RIK	1.32	P4_VS_P1_P2_P3_Lumbar_Coeliac_Stellate_Sphenopalatine	0	0	0	1	0	0	0	0
DLK2	1.32	Lumbar_VS_P1_P2_P3_P4_Coeliac_Stellate_Sphenopalatine	0	0	0	0	1	0	0	0
TSHR	1.32	P1_Lumbar_VS_P2_P3_P4_Coeliac_Stellate_Sphenopalatine	1	0	0	0	1	0	0	0
GM37529	1.32	Lumbar_Coeliac_VS_P1_P2_P3_P4_Stellate_Sphenopalatine	0	0	0	0	1	1	0	0
GPC2	1.32	Lumbar_Coeliac_VS_P1_P2_P3_P4_Stellate_Sphenopalatine	0	0	0	0	1	1	0	0
CHSY3	1.32	Lumbar_Coeliac_VS_P1_P2_P3_P4_Stellate_Sphenopalatine	0	0	0	0	1	1	0	0
JHY	1.32	P1_P3_P4_Lumbar_Coeliac_VS_P2_Stellate_Sphenopalatine	1	0	1	1	1	1	0	0
1700011L22RIK	1.32	P1_P2_P3_P4_Lumbar_Coeliac_VS_Stellate_Sphenopalatine	1	1	1	1	1	1	0	0
SMTNL2	1.32	P3_P4_Lumbar_Coeliac_Stellate_VS_P1_P2_Sphenopalatine	0	0	1	1	1	1	1	0
VASH2	1.32	P1_P3_Lumbar_Coeliac_Stellate_Sphenopalatine_VS_P2_P4	1	0	1	0	1	1	1	1
ZC3HAV1	1.32	P1_P2_P4_Lumbar_Coeliac_Stellate_Sphenopalatine_VS_P3	1	1	0	1	1	1	1	1
CYP1B1	1.31	P1_VS_P2_P3_P4_Lumbar_Coeliac_Stellate_Sphenopalatine	1	0	0	0	0	0	0	0
NR4A3	1.31	P2_VS_P1_P3_P4_Lumbar_Coeliac_Stellate_Sphenopalatine	0	1	0	0	0	0	0	0
FNDC5	1.31	P2_VS_P1_P3_P4_Lumbar_Coeliac_Stellate_Sphenopalatine	0	1	0	0	0	0	0	0
ADAM12	1.31	P2_VS_P1_P3_P4_Lumbar_Coeliac_Stellate_Sphenopalatine	0	1	0	0	0	0	0	0
ARHGAP31	1.31	P2_VS_P1_P3_P4_Lumbar_Coeliac_Stellate_Sphenopalatine	0	1	0	0	0	0	0	0
SERPINE2	1.31	P1_P2_P4_VS_P3_Lumbar_Coeliac_Stellate_Sphenopalatine	1	1	0	1	0	0	0	0
FGGY	1.31	Lumbar_Coeliac_VS_P1_P2_P3_P4_Stellate_Sphenopalatine	0	0	0	0	1	1	0	0
GNB3	1.31	P3_Lumbar_Coeliac_Stellate_VS_P1_P2_P4_Sphenopalatine	0	0	1	0	1	1	1	0
ACVR2B	1.31	P1_P2_P3_P4_Lumbar_Coeliac_Sphenopalatine_VS_Stellate	1	1	1	1	1	1	0	1
ZBTB7C	1.31	P1_P2_P3_P4_Lumbar_Coeliac_Sphenopalatine_VS_Stellate	1	1	1	1	1	1	0	1
FAM183B	1.3	P4_VS_P1_P2_P3_Lumbar_Coeliac_Stellate_Sphenopalatine	0	0	0	1	0	0	0	0
SINHCAF	1.3	Lumbar_Coeliac_VS_P1_P2_P3_P4_Stellate_Sphenopalatine	0	0	0	0	1	1	0	0
LMNB1	1.3	Lumbar_Coeliac_VS_P1_P2_P3_P4_Stellate_Sphenopalatine	0	0	0	0	1	1	0	0
FRMPD4	1.3	P2_P3_P4_Lumbar_Coeliac_VS_P1_Stellate_Sphenopalatine	0	1	1	1	1	1	0	0
TGFB1	1.3	P2_P3_Lumbar_Coeliac_Stellate_VS_P1_P4_Sphenopalatine	0	1	1	0	1	1	1	0
PRAG1	1.3	Sphenopalatine_VS_P1_P2_P3_P4_Lumbar_Coeliac_Stellate	0	0	0	0	0	0	0	1
MAPKAPK2	1.3	P1_P2_P3_P4_Lumbar_Coeliac_Sphenopalatine_VS_Stellate	1	1	1	1	1	1	0	1
CREB5	1.3	P1_P2_P3_P4_Lumbar_Coeliac_Sphenopalatine_VS_Stellate	1	1	1	1	1	1	0	1
DAPK3	1.3	P1_P2_P3_P4_Lumbar_Coeliac_Sphenopalatine_VS_Stellate	1	1	1	1	1	1	0	1
OTULIN	1.3	P1_P2_P3_P4_Lumbar_Coeliac_Sphenopalatine_VS_Stellate	1	1	1	1	1	1	0	1
ADRA1B	1.29	P2_VS_P1_P3_P4_Lumbar_Coeliac_Stellate_Sphenopalatine	0	1	0	0	0	0	0	0
GALM	1.29	P2_VS_P1_P3_P4_Lumbar_Coeliac_Stellate_Sphenopalatine	0	1	0	0	0	0	0	0
PKDCC	1.29	P2_VS_P1_P3_P4_Lumbar_Coeliac_Stellate_Sphenopalatine	0	1	0	0	0	0	0	0
MATN4	1.29	P4_VS_P1_P2_P3_Lumbar_Coeliac_Stellate_Sphenopalatine	0	0	0	1	0	0	0	0
FOXO1	1.29	P2_P4_VS_P1_P3_Lumbar_Coeliac_Stellate_Sphenopalatine	0	1	0	1	0	0	0	0
SLC4A10	1.29	P3_P4_VS_P1_P2_Lumbar_Coeliac_Stellate_Sphenopalatine	0	0	1	1	0	0	0	0
HPDL	1.29	Lumbar_VS_P1_P2_P3_P4_Coeliac_Stellate_Sphenopalatine	0	0	0	0	1	0	0	0
ZFP605	1.29	Lumbar_Coeliac_VS_P1_P2_P3_P4_Stellate_Sphenopalatine	0	0	0	0	1	1	0	0
ADGRG6	1.29	P1_P4_Sphenopalatine_VS_P2_P3_Lumbar_Coeliac_Stellate	1	0	0	1	0	0	0	1
GM12122	1.29	P1_P2_P3_P4_Lumbar_Coeliac_Sphenopalatine_VS_Stellate	1	1	1	1	1	1	0	1
GM14964	1.29	P1_P2_P3_Lumbar_Coeliac_Stellate_Sphenopalatine_VS_P4	1	1	1	0	1	1	1	1
EPS8	1.28	P4_VS_P1_P2_P3_Lumbar_Coeliac_Stellate_Sphenopalatine	0	0	0	1	0	0	0	0
EDNRA	1.28	P4_VS_P1_P2_P3_Lumbar_Coeliac_Stellate_Sphenopalatine	0	0	0	1	0	0	0	0
ALDH3B1	1.28	P3_P4_VS_P1_P2_Lumbar_Coeliac_Stellate_Sphenopalatine	0	0	1	1	0	0	0	0
DEXI	1.28	P1_P2_P3_P4_Lumbar_Coeliac_VS_Stellate_Sphenopalatine	1	1	1	1	1	1	0	0
RASGRP2	1.28	Sphenopalatine_VS_P1_P2_P3_P4_Lumbar_Coeliac_Stellate	0	0	0	0	0	0	0	1
VEGFA	1.28	P1_P2_P3_P4_Lumbar_Coeliac_Sphenopalatine_VS_Stellate	1	1	1	1	1	1	0	1
ATP2B3	1.28	P1_P2_P3_P4_Lumbar_Coeliac_Sphenopalatine_VS_Stellate	1	1	1	1	1	1	0	1
FXYD5	1.28	P1_P3_Lumbar_Coeliac_Stellate_Sphenopalatine_VS_P2_P4	1	0	1	0	1	1	1	1
SULF2	1.28	P1_P2_P4_Lumbar_Coeliac_Stellate_Sphenopalatine_VS_P3	1	1	0	1	1	1	1	1
RNF207	1.27	P4_VS_P1_P2_P3_Lumbar_Coeliac_Stellate_Sphenopalatine	0	0	0	1	0	0	0	0
B3GNT8	1.27	P4_VS_P1_P2_P3_Lumbar_Coeliac_Stellate_Sphenopalatine	0	0	0	1	0	0	0	0
RUNX1T1	1.27	Lumbar_VS_P1_P2_P3_P4_Coeliac_Stellate_Sphenopalatine	0	0	0	0	1	0	0	0
CXCR4	1.27	Lumbar_Coeliac_VS_P1_P2_P3_P4_Stellate_Sphenopalatine	0	0	0	0	1	1	0	0
DLEU2	1.27	Lumbar_Coeliac_VS_P1_P2_P3_P4_Stellate_Sphenopalatine	0	0	0	0	1	1	0	0
SPTB	1.27	P1_P2_P3_P4_Lumbar_Coeliac_VS_Stellate_Sphenopalatine	1	1	1	1	1	1	0	0
MAOB	1.27	P1_P2_P3_P4_Lumbar_Coeliac_Stellate_VS_Sphenopalatine	1	1	1	1	1	1	1	0
DOCK10	1.27	Sphenopalatine_VS_P1_P2_P3_P4_Lumbar_Coeliac_Stellate	0	0	0	0	0	0	0	1
KCNK2	1.27	P1_P2_P3_P4_Lumbar_Coeliac_Sphenopalatine_VS_Stellate	1	1	1	1	1	1	0	1
ARHGEF11	1.27	P1_P2_P3_P4_Lumbar_Coeliac_Sphenopalatine_VS_Stellate	1	1	1	1	1	1	0	1
SCN1B	1.27	P1_P2_P3_P4_Lumbar_Coeliac_Sphenopalatine_VS_Stellate	1	1	1	1	1	1	0	1
PALLD	1.27	P1_P2_P3_P4_Lumbar_Coeliac_Sphenopalatine_VS_Stellate	1	1	1	1	1	1	0	1
EYA4	1.27	P1_P2_P3_P4_Lumbar_Coeliac_Sphenopalatine_VS_Stellate	1	1	1	1	1	1	0	1
PTPRE	1.27	P1_P2_P4_Lumbar_Coeliac_Stellate_Sphenopalatine_VS_P3	1	1	0	1	1	1	1	1
TLE3	1.26	P2_VS_P1_P3_P4_Lumbar_Coeliac_Stellate_Sphenopalatine	0	1	0	0	0	0	0	0
RIPPLY2	1.26	Coeliac_VS_P1_P2_P3_P4_Lumbar_Stellate_Sphenopalatine	0	0	0	0	0	1	0	0
DOK5	1.26	P1_P2_P3_P4_Lumbar_Coeliac_Stellate_VS_Sphenopalatine	1	1	1	1	1	1	1	0
XAF1	1.26	P1_Sphenopalatine_VS_P2_P3_P4_Lumbar_Coeliac_Stellate	1	0	0	0	0	0	0	1
RAB3B	1.26	P1_P2_P3_Lumbar_Coeliac_Stellate_Sphenopalatine_VS_P4	1	1	1	0	1	1	1	1
PDE8B	1.25	P2_VS_P1_P3_P4_Lumbar_Coeliac_Stellate_Sphenopalatine	0	1	0	0	0	0	0	0
B3GALT5	1.25	P2_VS_P1_P3_P4_Lumbar_Coeliac_Stellate_Sphenopalatine	0	1	0	0	0	0	0	0
EEPD1	1.25	P4_VS_P1_P2_P3_Lumbar_Coeliac_Stellate_Sphenopalatine	0	0	0	1	0	0	0	0
CCN2	1.25	P4_VS_P1_P2_P3_Lumbar_Coeliac_Stellate_Sphenopalatine	0	0	0	1	0	0	0	0
RAB37	1.25	P4_VS_P1_P2_P3_Lumbar_Coeliac_Stellate_Sphenopalatine	0	0	0	1	0	0	0	0
LPAR4	1.25	P4_VS_P1_P2_P3_Lumbar_Coeliac_Stellate_Sphenopalatine	0	0	0	1	0	0	0	0
PHGDH	1.25	P1_Sphenopalatine_VS_P2_P3_P4_Lumbar_Coeliac_Stellate	1	0	0	0	0	0	0	1
SHISAL1	1.25	P1_P2_P3_Sphenopalatine_VS_P4_Lumbar_Coeliac_Stellate	1	1	1	0	0	0	0	1
NPEPL1	1.25	P1_P2_P4_Sphenopalatine_VS_P3_Lumbar_Coeliac_Stellate	1	1	0	1	0	0	0	1
CREBRF	1.25	P1_P2_P3_P4_Lumbar_Coeliac_Sphenopalatine_VS_Stellate	1	1	1	1	1	1	0	1
DYNC1I1	1.25	P2_P3_P4_Lumbar_Coeliac_Stellate_Sphenopalatine_VS_P1	0	1	1	1	1	1	1	1
COL16A1	1.24	P4_VS_P1_P2_P3_Lumbar_Coeliac_Stellate_Sphenopalatine	0	0	0	1	0	0	0	0
IFIT1BL1	1.24	P4_VS_P1_P2_P3_Lumbar_Coeliac_Stellate_Sphenopalatine	0	0	0	1	0	0	0	0
B3GNT5	1.24	Lumbar_VS_P1_P2_P3_P4_Coeliac_Stellate_Sphenopalatine	0	0	0	0	1	0	0	0
CAR10	1.24	P1_Sphenopalatine_VS_P2_P3_P4_Lumbar_Coeliac_Stellate	1	0	0	0	0	0	0	1
GM40841	1.24	P1_P2_P3_P4_Lumbar_Coeliac_Sphenopalatine_VS_Stellate	1	1	1	1	1	1	0	1
CHRM2	1.24	P1_P3_P4_Lumbar_Coeliac_Stellate_Sphenopalatine_VS_P2	1	0	1	1	1	1	1	1
VSNL1	1.23	P4_VS_P1_P2_P3_Lumbar_Coeliac_Stellate_Sphenopalatine	0	0	0	1	0	0	0	0
MYO1B	1.23	P1_P2_P3_P4_Lumbar_Coeliac_Stellate_VS_Sphenopalatine	1	1	1	1	1	1	1	0
DGKK	1.23	Lumbar_Coeliac_Sphenopalatine_VS_P1_P2_P3_P4_Stellate	0	0	0	0	1	1	0	1
EEF1A2	1.23	P1_P2_P3_P4_Lumbar_Coeliac_Sphenopalatine_VS_Stellate	1	1	1	1	1	1	0	1
CASZ1	1.23	P1_P2_P4_Lumbar_Coeliac_Stellate_Sphenopalatine_VS_P3	1	1	0	1	1	1	1	1
REPS2	1.23	P1_P2_P4_Lumbar_Coeliac_Stellate_Sphenopalatine_VS_P3	1	1	0	1	1	1	1	1
FNDC1	1.22	P2_VS_P1_P3_P4_Lumbar_Coeliac_Stellate_Sphenopalatine	0	1	0	0	0	0	0	0
FBN2	1.22	P2_VS_P1_P3_P4_Lumbar_Coeliac_Stellate_Sphenopalatine	0	1	0	0	0	0	0	0
A2ML1	1.22	P4_VS_P1_P2_P3_Lumbar_Coeliac_Stellate_Sphenopalatine	0	0	0	1	0	0	0	0
MAML2	1.22	P4_VS_P1_P2_P3_Lumbar_Coeliac_Stellate_Sphenopalatine	0	0	0	1	0	0	0	0
ACSBG1	1.22	P4_VS_P1_P2_P3_Lumbar_Coeliac_Stellate_Sphenopalatine	0	0	0	1	0	0	0	0
SOX1OT	1.22	P1_P4_VS_P2_P3_Lumbar_Coeliac_Stellate_Sphenopalatine	1	0	0	1	0	0	0	0
TESCL	1.22	Lumbar_Coeliac_VS_P1_P2_P3_P4_Stellate_Sphenopalatine	0	0	0	0	1	1	0	0
ATP7A	1.22	P1_P2_P3_P4_Lumbar_Coeliac_Stellate_VS_Sphenopalatine	1	1	1	1	1	1	1	0
ITPKB	1.22	P1_P2_P3_P4_Sphenopalatine_VS_Lumbar_Coeliac_Stellate	1	1	1	1	0	0	0	1
PPP6R1	1.22	P1_P2_P3_P4_Lumbar_Coeliac_Sphenopalatine_VS_Stellate	1	1	1	1	1	1	0	1
RAD50	1.22	P1_P2_P3_P4_Lumbar_Coeliac_Sphenopalatine_VS_Stellate	1	1	1	1	1	1	0	1
L3MBTL4	1.22	P1_P3_P4_Lumbar_Coeliac_Stellate_Sphenopalatine_VS_P2	1	0	1	1	1	1	1	1
PRKCH	1.21	P2_VS_P1_P3_P4_Lumbar_Coeliac_Stellate_Sphenopalatine	0	1	0	0	0	0	0	0
GM30074	1.21	P3_VS_P1_P2_P4_Lumbar_Coeliac_Stellate_Sphenopalatine	0	0	1	0	0	0	0	0
SYNDIG1L	1.21	P3_VS_P1_P2_P4_Lumbar_Coeliac_Stellate_Sphenopalatine	0	0	1	0	0	0	0	0
GM43154	1.21	P4_VS_P1_P2_P3_Lumbar_Coeliac_Stellate_Sphenopalatine	0	0	0	1	0	0	0	0
INSC	1.21	P4_VS_P1_P2_P3_Lumbar_Coeliac_Stellate_Sphenopalatine	0	0	0	1	0	0	0	0
GPRC5B	1.21	P4_VS_P1_P2_P3_Lumbar_Coeliac_Stellate_Sphenopalatine	0	0	0	1	0	0	0	0
MPP7	1.21	Lumbar_Coeliac_VS_P1_P2_P3_P4_Stellate_Sphenopalatine	0	0	0	0	1	1	0	0
LRRC7	1.21	Sphenopalatine_VS_P1_P2_P3_P4_Lumbar_Coeliac_Stellate	0	0	0	0	0	0	0	1
B3GLCT	1.21	P1_P2_P3_P4_Sphenopalatine_VS_Lumbar_Coeliac_Stellate	1	1	1	1	0	0	0	1
COTL1	1.21	P1_P2_P3_P4_Coeliac_Sphenopalatine_VS_Lumbar_Stellate	1	1	1	1	0	1	0	1
SMAD7	1.21	P1_P2_P3_P4_Lumbar_Coeliac_Sphenopalatine_VS_Stellate	1	1	1	1	1	1	0	1
CARTPT	1.21	P1_P2_P3_P4_Coeliac_Stellate_Sphenopalatine_VS_Lumbar	1	1	1	1	0	1	1	1
OCIAD2	1.21	P3_P4_Lumbar_Coeliac_Stellate_Sphenopalatine_VS_P1_P2	0	0	1	1	1	1	1	1
BRINP1	1.2	P2_P3_VS_P1_P4_Lumbar_Coeliac_Stellate_Sphenopalatine	0	1	1	0	0	0	0	0
ATP1A2	1.2	P4_VS_P1_P2_P3_Lumbar_Coeliac_Stellate_Sphenopalatine	0	0	0	1	0	0	0	0
NPPC	1.2	Coeliac_VS_P1_P2_P3_P4_Lumbar_Stellate_Sphenopalatine	0	0	0	0	0	1	0	0
GM45321	1.2	Coeliac_VS_P1_P2_P3_P4_Lumbar_Stellate_Sphenopalatine	0	0	0	0	0	1	0	0
SLC16A9	1.2	Lumbar_Coeliac_VS_P1_P2_P3_P4_Stellate_Sphenopalatine	0	0	0	0	1	1	0	0
GM28221	1.2	Lumbar_Coeliac_VS_P1_P2_P3_P4_Stellate_Sphenopalatine	0	0	0	0	1	1	0	0
SAMD11	1.2	P3_Lumbar_Coeliac_Stellate_VS_P1_P2_P4_Sphenopalatine	0	0	1	0	1	1	1	0
SOX2OT	1.2	Sphenopalatine_VS_P1_P2_P3_P4_Lumbar_Coeliac_Stellate	0	0	0	0	0	0	0	1
CDH10	1.2	Sphenopalatine_VS_P1_P2_P3_P4_Lumbar_Coeliac_Stellate	0	0	0	0	0	0	0	1
KAZN	1.2	P1_P2_Sphenopalatine_VS_P3_P4_Lumbar_Coeliac_Stellate	1	1	0	0	0	0	0	1
CNTN5	1.2	P1_P2_P3_Sphenopalatine_VS_P4_Lumbar_Coeliac_Stellate	1	1	1	0	0	0	0	1
HTR3A	1.2	P1_P2_P3_P4_Sphenopalatine_VS_Lumbar_Coeliac_Stellate	1	1	1	1	0	0	0	1
SH3BP4	1.2	P1_P2_P3_P4_Lumbar_Coeliac_Sphenopalatine_VS_Stellate	1	1	1	1	1	1	0	1
WHAMM	1.2	P1_P2_P3_P4_Lumbar_Coeliac_Sphenopalatine_VS_Stellate	1	1	1	1	1	1	0	1
SESN3	1.2	P1_P2_P3_P4_Lumbar_Coeliac_Sphenopalatine_VS_Stellate	1	1	1	1	1	1	0	1
RASGRF2	1.2	P1_P2_P3_P4_Lumbar_Coeliac_Sphenopalatine_VS_Stellate	1	1	1	1	1	1	0	1
RYR3	1.19	P1_VS_P2_P3_P4_Lumbar_Coeliac_Stellate_Sphenopalatine	1	0	0	0	0	0	0	0
FAM129A	1.19	P4_VS_P1_P2_P3_Lumbar_Coeliac_Stellate_Sphenopalatine	0	0	0	1	0	0	0	0
IRF5	1.19	P4_VS_P1_P2_P3_Lumbar_Coeliac_Stellate_Sphenopalatine	0	0	0	1	0	0	0	0
DBPHT2	1.19	P3_P4_VS_P1_P2_Lumbar_Coeliac_Stellate_Sphenopalatine	0	0	1	1	0	0	0	0
6030407O03RIK	1.19	Coeliac_VS_P1_P2_P3_P4_Lumbar_Stellate_Sphenopalatine	0	0	0	0	0	1	0	0
FAXC	1.19	Lumbar_Coeliac_VS_P1_P2_P3_P4_Stellate_Sphenopalatine	0	0	0	0	1	1	0	0
ZBTB12	1.19	Lumbar_Coeliac_VS_P1_P2_P3_P4_Stellate_Sphenopalatine	0	0	0	0	1	1	0	0
TENM3	1.19	P3_Lumbar_Coeliac_VS_P1_P2_P4_Stellate_Sphenopalatine	0	0	1	0	1	1	0	0
GPC3	1.19	Sphenopalatine_VS_P1_P2_P3_P4_Lumbar_Coeliac_Stellate	0	0	0	0	0	0	0	1
ALDH1B1	1.19	P1_P3_Lumbar_Coeliac_Sphenopalatine_VS_P2_P4_Stellate	1	0	1	0	1	1	0	1
ZMAT4	1.19	P1_P3_P4_Lumbar_Coeliac_Stellate_Sphenopalatine_VS_P2	1	0	1	1	1	1	1	1
GM26802	1.18	P4_VS_P1_P2_P3_Lumbar_Coeliac_Stellate_Sphenopalatine	0	0	0	1	0	0	0	0
HLF	1.18	Coeliac_VS_P1_P2_P3_P4_Lumbar_Stellate_Sphenopalatine	0	0	0	0	0	1	0	0
CAD	1.18	Lumbar_Coeliac_VS_P1_P2_P3_P4_Stellate_Sphenopalatine	0	0	0	0	1	1	0	0
PPP1R36	1.18	Lumbar_Coeliac_VS_P1_P2_P3_P4_Stellate_Sphenopalatine	0	0	0	0	1	1	0	0
NRG2	1.18	Lumbar_Coeliac_VS_P1_P2_P3_P4_Stellate_Sphenopalatine	0	0	0	0	1	1	0	0
FAM189A2	1.18	P1_P2_P3_P4_Lumbar_Coeliac_Stellate_VS_Sphenopalatine	1	1	1	1	1	1	1	0
RAMP3	1.18	P1_P2_P3_Lumbar_Sphenopalatine_VS_P4_Coeliac_Stellate	1	1	1	0	1	0	0	1
FJX1	1.18	P1_P2_P3_P4_Lumbar_Coeliac_Sphenopalatine_VS_Stellate	1	1	1	1	1	1	0	1
AI504432	1.18	P1_P2_P3_P4_Lumbar_Coeliac_Sphenopalatine_VS_Stellate	1	1	1	1	1	1	0	1
ELFN2	1.18	P1_P2_P3_P4_Lumbar_Coeliac_Sphenopalatine_VS_Stellate	1	1	1	1	1	1	0	1
PTCHD1	1.18	P1_P2_P3_P4_Lumbar_Coeliac_Sphenopalatine_VS_Stellate	1	1	1	1	1	1	0	1
GRB10	1.18	P1_P3_P4_Lumbar_Coeliac_Stellate_Sphenopalatine_VS_P2	1	0	1	1	1	1	1	1
OLFM3	1.17	P1_P3_VS_P2_P4_Lumbar_Coeliac_Stellate_Sphenopalatine	1	0	1	0	0	0	0	0
ARHGAP27	1.17	P4_VS_P1_P2_P3_Lumbar_Coeliac_Stellate_Sphenopalatine	0	0	0	1	0	0	0	0
GREM1	1.17	Lumbar_VS_P1_P2_P3_P4_Coeliac_Stellate_Sphenopalatine	0	0	0	0	1	0	0	0
OPCML	1.17	Lumbar_VS_P1_P2_P3_P4_Coeliac_Stellate_Sphenopalatine	0	0	0	0	1	0	0	0
PDLIM3	1.17	Sphenopalatine_VS_P1_P2_P3_P4_Lumbar_Coeliac_Stellate	0	0	0	0	0	0	0	1
GM10605	1.17	P1_P2_P3_P4_Lumbar_Stellate_Sphenopalatine_VS_Coeliac	1	1	1	1	1	0	1	1
DDC	1.17	P1_P2_P3_Lumbar_Coeliac_Stellate_Sphenopalatine_VS_P4	1	1	1	0	1	1	1	1
LRRN3	1.17	P1_P3_P4_Lumbar_Coeliac_Stellate_Sphenopalatine_VS_P2	1	0	1	1	1	1	1	1
4833415N18RIK	1.16	P1_VS_P2_P3_P4_Lumbar_Coeliac_Stellate_Sphenopalatine	1	0	0	0	0	0	0	0
SLC12A5	1.16	P2_VS_P1_P3_P4_Lumbar_Coeliac_Stellate_Sphenopalatine	0	1	0	0	0	0	0	0
POSTN	1.16	P4_VS_P1_P2_P3_Lumbar_Coeliac_Stellate_Sphenopalatine	0	0	0	1	0	0	0	0
WWTR1	1.16	P4_VS_P1_P2_P3_Lumbar_Coeliac_Stellate_Sphenopalatine	0	0	0	1	0	0	0	0
BEND4	1.16	P4_VS_P1_P2_P3_Lumbar_Coeliac_Stellate_Sphenopalatine	0	0	0	1	0	0	0	0
TENM1	1.16	P4_VS_P1_P2_P3_Lumbar_Coeliac_Stellate_Sphenopalatine	0	0	0	1	0	0	0	0
SLC18A2	1.16	P1_P2_P3_Lumbar_Coeliac_Stellate_VS_P4_Sphenopalatine	1	1	1	0	1	1	1	0
MSRB2	1.16	P1_P2_P3_P4_Lumbar_Coeliac_Stellate_VS_Sphenopalatine	1	1	1	1	1	1	1	0
2010204K13RIK	1.16	P1_P2_P3_P4_Lumbar_Coeliac_Stellate_VS_Sphenopalatine	1	1	1	1	1	1	1	0
UNC5C	1.16	P1_P2_P4_Lumbar_Coeliac_Sphenopalatine_VS_P3_Stellate	1	1	0	1	1	1	0	1
BMP2K	1.16	P1_P2_P3_P4_Lumbar_Coeliac_Sphenopalatine_VS_Stellate	1	1	1	1	1	1	0	1
STAT5B	1.16	P1_P2_P3_P4_Lumbar_Coeliac_Sphenopalatine_VS_Stellate	1	1	1	1	1	1	0	1
UTRN	1.16	P3_Lumbar_Coeliac_Stellate_Sphenopalatine_VS_P1_P2_P4	0	0	1	0	1	1	1	1
GRB14	1.15	P3_VS_P1_P2_P4_Lumbar_Coeliac_Stellate_Sphenopalatine	0	0	1	0	0	0	0	0
LGR4	1.15	P4_VS_P1_P2_P3_Lumbar_Coeliac_Stellate_Sphenopalatine	0	0	0	1	0	0	0	0
TNC	1.15	P4_VS_P1_P2_P3_Lumbar_Coeliac_Stellate_Sphenopalatine	0	0	0	1	0	0	0	0
TULP2	1.15	P4_VS_P1_P2_P3_Lumbar_Coeliac_Stellate_Sphenopalatine	0	0	0	1	0	0	0	0
ANK1	1.15	P4_VS_P1_P2_P3_Lumbar_Coeliac_Stellate_Sphenopalatine	0	0	0	1	0	0	0	0
GPR119	1.15	P4_VS_P1_P2_P3_Lumbar_Coeliac_Stellate_Sphenopalatine	0	0	0	1	0	0	0	0
PRR15	1.15	P1_P4_VS_P2_P3_Lumbar_Coeliac_Stellate_Sphenopalatine	1	0	0	1	0	0	0	0
BMP1	1.15	Lumbar_Coeliac_VS_P1_P2_P3_P4_Stellate_Sphenopalatine	0	0	0	0	1	1	0	0
PTGER3	1.15	P4_Lumbar_Coeliac_VS_P1_P2_P3_Stellate_Sphenopalatine	0	0	0	1	1	1	0	0
CACNA1D	1.15	P1_P2_P3_P4_Lumbar_Coeliac_VS_Stellate_Sphenopalatine	1	1	1	1	1	1	0	0
GALNT16	1.15	P2_P3_Lumbar_Coeliac_Stellate_VS_P1_P4_Sphenopalatine	0	1	1	0	1	1	1	0
NTNG1	1.15	P1_P2_P3_P4_Lumbar_Coeliac_Stellate_VS_Sphenopalatine	1	1	1	1	1	1	1	0
NPY1R	1.15	P1_P2_P3_Sphenopalatine_VS_P4_Lumbar_Coeliac_Stellate	1	1	1	0	0	0	0	1
ADGRL2	1.15	P1_P2_P3_P4_Lumbar_Coeliac_Sphenopalatine_VS_Stellate	1	1	1	1	1	1	0	1
ZBTB1	1.15	P1_P2_P3_P4_Lumbar_Coeliac_Sphenopalatine_VS_Stellate	1	1	1	1	1	1	0	1
PLXNC1	1.15	P2_P3_P4_Lumbar_Coeliac_Stellate_Sphenopalatine_VS_P1	0	1	1	1	1	1	1	1
SOSTDC1	1.14	P4_VS_P1_P2_P3_Lumbar_Coeliac_Stellate_Sphenopalatine	0	0	0	1	0	0	0	0
TAFA2	1.14	P1_P2_P4_VS_P3_Lumbar_Coeliac_Stellate_Sphenopalatine	1	1	0	1	0	0	0	0
GM47033	1.14	Lumbar_Coeliac_VS_P1_P2_P3_P4_Stellate_Sphenopalatine	0	0	0	0	1	1	0	0
GM13889	1.14	P1_P2_P3_P4_Lumbar_Coeliac_Stellate_VS_Sphenopalatine	1	1	1	1	1	1	1	0
CDH11	1.14	P1_P4_Sphenopalatine_VS_P2_P3_Lumbar_Coeliac_Stellate	1	0	0	1	0	0	0	1
ASS1	1.14	P1_P2_P3_P4_Sphenopalatine_VS_Lumbar_Coeliac_Stellate	1	1	1	1	0	0	0	1
AFF3	1.14	P1_P2_P3_P4_Lumbar_Coeliac_Sphenopalatine_VS_Stellate	1	1	1	1	1	1	0	1
PYGL	1.13	Lumbar_VS_P1_P2_P3_P4_Coeliac_Stellate_Sphenopalatine	0	0	0	0	1	0	0	0
TMEM28	1.13	Lumbar_VS_P1_P2_P3_P4_Coeliac_Stellate_Sphenopalatine	0	0	0	0	1	0	0	0
MITF	1.13	Coeliac_VS_P1_P2_P3_P4_Lumbar_Stellate_Sphenopalatine	0	0	0	0	0	1	0	0
PDE1B	1.13	P1_P2_P3_P4_Lumbar_Coeliac_Stellate_VS_Sphenopalatine	1	1	1	1	1	1	1	0
GPC6	1.13	Lumbar_Sphenopalatine_VS_P1_P2_P3_P4_Coeliac_Stellate	0	0	0	0	1	0	0	1
FAT4	1.13	P1_P2_P3_P4_Lumbar_Coeliac_Sphenopalatine_VS_Stellate	1	1	1	1	1	1	0	1
CNTLN	1.13	P1_P2_P3_P4_Lumbar_Coeliac_Sphenopalatine_VS_Stellate	1	1	1	1	1	1	0	1
KCNC1	1.13	P1_P2_P3_P4_Lumbar_Coeliac_Sphenopalatine_VS_Stellate	1	1	1	1	1	1	0	1
PACS1	1.13	P1_P2_P3_P4_Lumbar_Coeliac_Sphenopalatine_VS_Stellate	1	1	1	1	1	1	0	1
TRPM2	1.13	P1_P2_P3_Lumbar_Coeliac_Stellate_Sphenopalatine_VS_P4	1	1	1	0	1	1	1	1
RND3	1.13	P1_P4_Lumbar_Coeliac_Stellate_Sphenopalatine_VS_P2_P3	1	0	0	1	1	1	1	1
MAL	1.12	P4_VS_P1_P2_P3_Lumbar_Coeliac_Stellate_Sphenopalatine	0	0	0	1	0	0	0	0
MAF	1.12	P4_VS_P1_P2_P3_Lumbar_Coeliac_Stellate_Sphenopalatine	0	0	0	1	0	0	0	0
SFRP1	1.12	P4_Lumbar_VS_P1_P2_P3_Coeliac_Stellate_Sphenopalatine	0	0	0	1	1	0	0	0
CALM4	1.12	Coeliac_VS_P1_P2_P3_P4_Lumbar_Stellate_Sphenopalatine	0	0	0	0	0	1	0	0
DAB1	1.12	P4_Coeliac_VS_P1_P2_P3_Lumbar_Stellate_Sphenopalatine	0	0	0	1	0	1	0	0
GM26984	1.12	Lumbar_Coeliac_VS_P1_P2_P3_P4_Stellate_Sphenopalatine	0	0	0	0	1	1	0	0
IGFBP4	1.12	Sphenopalatine_VS_P1_P2_P3_P4_Lumbar_Coeliac_Stellate	0	0	0	0	0	0	0	1
H1FX	1.12	P1_P2_P3_P4_Lumbar_Coeliac_Sphenopalatine_VS_Stellate	1	1	1	1	1	1	0	1
KIF13B	1.12	P1_P2_P3_P4_Lumbar_Coeliac_Sphenopalatine_VS_Stellate	1	1	1	1	1	1	0	1
CRISPLD1	1.12	P1_P2_Lumbar_Coeliac_Stellate_Sphenopalatine_VS_P3_P4	1	1	0	0	1	1	1	1
LAMA4	1.11	P1_VS_P2_P3_P4_Lumbar_Coeliac_Stellate_Sphenopalatine	1	0	0	0	0	0	0	0
NPAS4	1.11	P2_P4_VS_P1_P3_Lumbar_Coeliac_Stellate_Sphenopalatine	0	1	0	1	0	0	0	0
SPATA31D1A	1.11	Coeliac_VS_P1_P2_P3_P4_Lumbar_Stellate_Sphenopalatine	0	0	0	0	0	1	0	0
DDX23	1.11	Lumbar_Coeliac_VS_P1_P2_P3_P4_Stellate_Sphenopalatine	0	0	0	0	1	1	0	0
CXADR	1.11	Lumbar_Coeliac_VS_P1_P2_P3_P4_Stellate_Sphenopalatine	0	0	0	0	1	1	0	0
ZFP800	1.11	P1_P2_P3_P4_Lumbar_Coeliac_VS_Stellate_Sphenopalatine	1	1	1	1	1	1	0	0
GM5148	1.11	Sphenopalatine_VS_P1_P2_P3_P4_Lumbar_Coeliac_Stellate	0	0	0	0	0	0	0	1
LOXL1	1.11	Sphenopalatine_VS_P1_P2_P3_P4_Lumbar_Coeliac_Stellate	0	0	0	0	0	0	0	1
GREB1L	1.11	Sphenopalatine_VS_P1_P2_P3_P4_Lumbar_Coeliac_Stellate	0	0	0	0	0	0	0	1
VWF	1.11	P1_Sphenopalatine_VS_P2_P3_P4_Lumbar_Coeliac_Stellate	1	0	0	0	0	0	0	1
VANGL1	1.11	P1_P2_P4_Sphenopalatine_VS_P3_Lumbar_Coeliac_Stellate	1	1	0	1	0	0	0	1
CELSR1	1.1	P3_VS_P1_P2_P4_Lumbar_Coeliac_Stellate_Sphenopalatine	0	0	1	0	0	0	0	0
PLD5	1.1	P4_VS_P1_P2_P3_Lumbar_Coeliac_Stellate_Sphenopalatine	0	0	0	1	0	0	0	0
SLC7A2	1.1	P4_VS_P1_P2_P3_Lumbar_Coeliac_Stellate_Sphenopalatine	0	0	0	1	0	0	0	0
LAMA2	1.1	P4_VS_P1_P2_P3_Lumbar_Coeliac_Stellate_Sphenopalatine	0	0	0	1	0	0	0	0
MYO1A	1.1	Lumbar_VS_P1_P2_P3_P4_Coeliac_Stellate_Sphenopalatine	0	0	0	0	1	0	0	0
COCH	1.1	Lumbar_VS_P1_P2_P3_P4_Coeliac_Stellate_Sphenopalatine	0	0	0	0	1	0	0	0
HIST2H2AC	1.1	Coeliac_VS_P1_P2_P3_P4_Lumbar_Stellate_Sphenopalatine	0	0	0	0	0	1	0	0
ZFP976	1.1	Lumbar_Coeliac_VS_P1_P2_P3_P4_Stellate_Sphenopalatine	0	0	0	0	1	1	0	0
LCORL	1.1	P1_P2_P3_P4_Lumbar_Coeliac_VS_Stellate_Sphenopalatine	1	1	1	1	1	1	0	0
NDP	1.1	Lumbar_Coeliac_Stellate_VS_P1_P2_P3_P4_Sphenopalatine	0	0	0	0	1	1	1	0
CIDEA	1.1	P1_P2_P3_Sphenopalatine_VS_P4_Lumbar_Coeliac_Stellate	1	1	1	0	0	0	0	1
MOSMO	1.1	P1_P2_P3_P4_Lumbar_Coeliac_Sphenopalatine_VS_Stellate	1	1	1	1	1	1	0	1
GPRIN2	1.1	P1_P2_P3_P4_Lumbar_Coeliac_Sphenopalatine_VS_Stellate	1	1	1	1	1	1	0	1
KHSRP	1.1	P1_P2_P3_P4_Lumbar_Coeliac_Sphenopalatine_VS_Stellate	1	1	1	1	1	1	0	1
LRRTM4	1.1	P1_P4_Lumbar_Stellate_Sphenopalatine_VS_P2_P3_Coeliac	1	0	0	1	1	0	1	1
CACNG4	1.1	P1_P2_P3_Lumbar_Coeliac_Stellate_Sphenopalatine_VS_P4	1	1	1	0	1	1	1	1
REM2	1.09	P3_VS_P1_P2_P4_Lumbar_Coeliac_Stellate_Sphenopalatine	0	0	1	0	0	0	0	0
FIGN	1.09	P4_VS_P1_P2_P3_Lumbar_Coeliac_Stellate_Sphenopalatine	0	0	0	1	0	0	0	0
MMP14	1.09	P4_VS_P1_P2_P3_Lumbar_Coeliac_Stellate_Sphenopalatine	0	0	0	1	0	0	0	0
GM45338	1.09	P1_P2_P4_VS_P3_Lumbar_Coeliac_Stellate_Sphenopalatine	1	1	0	1	0	0	0	0
DOK7	1.09	Lumbar_Coeliac_VS_P1_P2_P3_P4_Stellate_Sphenopalatine	0	0	0	0	1	1	0	0
MAP2K6	1.09	Lumbar_Coeliac_VS_P1_P2_P3_P4_Stellate_Sphenopalatine	0	0	0	0	1	1	0	0
ZFP758	1.09	Lumbar_Coeliac_VS_P1_P2_P3_P4_Stellate_Sphenopalatine	0	0	0	0	1	1	0	0
TRIM66	1.09	Sphenopalatine_VS_P1_P2_P3_P4_Lumbar_Coeliac_Stellate	0	0	0	0	0	0	0	1
SYNE1	1.09	P1_P2_P3_P4_Lumbar_Coeliac_Sphenopalatine_VS_Stellate	1	1	1	1	1	1	0	1
MLH3	1.09	P1_P2_P3_P4_Lumbar_Coeliac_Sphenopalatine_VS_Stellate	1	1	1	1	1	1	0	1
MBD2	1.09	P1_P2_P3_P4_Lumbar_Coeliac_Sphenopalatine_VS_Stellate	1	1	1	1	1	1	0	1
TESC	1.09	P1_P3_P4_Lumbar_Coeliac_Stellate_Sphenopalatine_VS_P2	1	0	1	1	1	1	1	1
DLX3	1.08	P3_VS_P1_P2_P4_Lumbar_Coeliac_Stellate_Sphenopalatine	0	0	1	0	0	0	0	0
TGFBR3	1.08	P4_VS_P1_P2_P3_Lumbar_Coeliac_Stellate_Sphenopalatine	0	0	0	1	0	0	0	0
CALML4	1.08	P2_P4_VS_P1_P3_Lumbar_Coeliac_Stellate_Sphenopalatine	0	1	0	1	0	0	0	0
KCNN3	1.08	Lumbar_VS_P1_P2_P3_P4_Coeliac_Stellate_Sphenopalatine	0	0	0	0	1	0	0	0
CHRNA4	1.08	Coeliac_VS_P1_P2_P3_P4_Lumbar_Stellate_Sphenopalatine	0	0	0	0	0	1	0	0
SYNE2	1.08	Coeliac_VS_P1_P2_P3_P4_Lumbar_Stellate_Sphenopalatine	0	0	0	0	0	1	0	0
EZH2	1.08	Lumbar_Coeliac_VS_P1_P2_P3_P4_Stellate_Sphenopalatine	0	0	0	0	1	1	0	0
PRR18	1.08	Lumbar_Coeliac_VS_P1_P2_P3_P4_Stellate_Sphenopalatine	0	0	0	0	1	1	0	0
SHROOM1	1.08	P3_Lumbar_Coeliac_VS_P1_P2_P4_Stellate_Sphenopalatine	0	0	1	0	1	1	0	0
KCNJ3	1.08	P1_P2_P3_P4_Sphenopalatine_VS_Lumbar_Coeliac_Stellate	1	1	1	1	0	0	0	1
PIP4K2A	1.08	P1_P2_P3_P4_Lumbar_Coeliac_Sphenopalatine_VS_Stellate	1	1	1	1	1	1	0	1
PIK3R3	1.08	P1_P2_P3_P4_Lumbar_Coeliac_Sphenopalatine_VS_Stellate	1	1	1	1	1	1	0	1
SYNM	1.08	P1_P2_P3_P4_Lumbar_Coeliac_Sphenopalatine_VS_Stellate	1	1	1	1	1	1	0	1
FSTL1	1.08	P1_P2_P3_P4_Lumbar_Coeliac_Sphenopalatine_VS_Stellate	1	1	1	1	1	1	0	1
GM26638	1.08	P1_P2_P3_Lumbar_Coeliac_Stellate_Sphenopalatine_VS_P4	1	1	1	0	1	1	1	1
GRIN3A	1.07	P2_VS_P1_P3_P4_Lumbar_Coeliac_Stellate_Sphenopalatine	0	1	0	0	0	0	0	0
GM31143	1.07	P3_VS_P1_P2_P4_Lumbar_Coeliac_Stellate_Sphenopalatine	0	0	1	0	0	0	0	0
RIN2	1.07	P4_VS_P1_P2_P3_Lumbar_Coeliac_Stellate_Sphenopalatine	0	0	0	1	0	0	0	0
BCHE	1.07	P4_VS_P1_P2_P3_Lumbar_Coeliac_Stellate_Sphenopalatine	0	0	0	1	0	0	0	0
PTPRZ1	1.07	P4_VS_P1_P2_P3_Lumbar_Coeliac_Stellate_Sphenopalatine	0	0	0	1	0	0	0	0
PKP3	1.07	P4_VS_P1_P2_P3_Lumbar_Coeliac_Stellate_Sphenopalatine	0	0	0	1	0	0	0	0
SYNPO	1.07	P4_VS_P1_P2_P3_Lumbar_Coeliac_Stellate_Sphenopalatine	0	0	0	1	0	0	0	0
D130040H23RIK	1.07	Coeliac_VS_P1_P2_P3_P4_Lumbar_Stellate_Sphenopalatine	0	0	0	0	0	1	0	0
E130102H24RIK	1.07	Lumbar_Coeliac_VS_P1_P2_P3_P4_Stellate_Sphenopalatine	0	0	0	0	1	1	0	0
UTS2B	1.07	Stellate_VS_P1_P2_P3_P4_Lumbar_Coeliac_Sphenopalatine	0	0	0	0	0	0	1	0
PRKCD	1.07	P1_P2_P3_Lumbar_Coeliac_Stellate_VS_P4_Sphenopalatine	1	1	1	0	1	1	1	0
GNG8	1.07	P1_Lumbar_Sphenopalatine_VS_P2_P3_P4_Coeliac_Stellate	1	0	0	0	1	0	0	1
TNRC18	1.07	P1_P2_P3_P4_Lumbar_Coeliac_Sphenopalatine_VS_Stellate	1	1	1	1	1	1	0	1
LRRC75A	1.07	P1_P2_P3_P4_Lumbar_Coeliac_Sphenopalatine_VS_Stellate	1	1	1	1	1	1	0	1
ABCA8A	1.06	P4_VS_P1_P2_P3_Lumbar_Coeliac_Stellate_Sphenopalatine	0	0	0	1	0	0	0	0
EDNRB	1.06	P4_VS_P1_P2_P3_Lumbar_Coeliac_Stellate_Sphenopalatine	0	0	0	1	0	0	0	0
RTP1	1.06	P4_VS_P1_P2_P3_Lumbar_Coeliac_Stellate_Sphenopalatine	0	0	0	1	0	0	0	0
GM49708	1.06	P4_VS_P1_P2_P3_Lumbar_Coeliac_Stellate_Sphenopalatine	0	0	0	1	0	0	0	0
ACTA2	1.06	P1_P2_P3_P4_VS_Lumbar_Coeliac_Stellate_Sphenopalatine	1	1	1	1	0	0	0	0
CEP350	1.06	Lumbar_Coeliac_VS_P1_P2_P3_P4_Stellate_Sphenopalatine	0	0	0	0	1	1	0	0
2310022B05RIK	1.06	Lumbar_Coeliac_VS_P1_P2_P3_P4_Stellate_Sphenopalatine	0	0	0	0	1	1	0	0
PREPL	1.06	Lumbar_Coeliac_VS_P1_P2_P3_P4_Stellate_Sphenopalatine	0	0	0	0	1	1	0	0
SLCO5A1	1.06	P3_Lumbar_Coeliac_VS_P1_P2_P4_Stellate_Sphenopalatine	0	0	1	0	1	1	0	0
GM20721	1.06	P1_P2_P3_P4_Lumbar_Coeliac_VS_Stellate_Sphenopalatine	1	1	1	1	1	1	0	0
SPHKAP	1.06	Sphenopalatine_VS_P1_P2_P3_P4_Lumbar_Coeliac_Stellate	0	0	0	0	0	0	0	1
LGR5	1.06	Sphenopalatine_VS_P1_P2_P3_P4_Lumbar_Coeliac_Stellate	0	0	0	0	0	0	0	1
TOP1MT	1.06	P1_P2_P3_P4_Lumbar_Sphenopalatine_VS_Coeliac_Stellate	1	1	1	1	1	0	0	1
ZFYVE1	1.06	P1_P2_P3_P4_Lumbar_Coeliac_Sphenopalatine_VS_Stellate	1	1	1	1	1	1	0	1
CBFA2T3	1.05	P3_VS_P1_P2_P4_Lumbar_Coeliac_Stellate_Sphenopalatine	0	0	1	0	0	0	0	0
LRRC55	1.05	P4_VS_P1_P2_P3_Lumbar_Coeliac_Stellate_Sphenopalatine	0	0	0	1	0	0	0	0
TTI1	1.05	P4_VS_P1_P2_P3_Lumbar_Coeliac_Stellate_Sphenopalatine	0	0	0	1	0	0	0	0
CNGB1	1.05	P4_VS_P1_P2_P3_Lumbar_Coeliac_Stellate_Sphenopalatine	0	0	0	1	0	0	0	0
SLC27A3	1.05	Lumbar_VS_P1_P2_P3_P4_Coeliac_Stellate_Sphenopalatine	0	0	0	0	1	0	0	0
STK33	1.05	Lumbar_VS_P1_P2_P3_P4_Coeliac_Stellate_Sphenopalatine	0	0	0	0	1	0	0	0
ATAD5	1.05	Coeliac_VS_P1_P2_P3_P4_Lumbar_Stellate_Sphenopalatine	0	0	0	0	0	1	0	0
GM38393	1.05	Lumbar_Coeliac_VS_P1_P2_P3_P4_Stellate_Sphenopalatine	0	0	0	0	1	1	0	0
PTK2B	1.05	P3_Lumbar_Coeliac_Stellate_VS_P1_P2_P4_Sphenopalatine	0	0	1	0	1	1	1	0
GCH1	1.05	P1_P2_P3_P4_Lumbar_Coeliac_Stellate_VS_Sphenopalatine	1	1	1	1	1	1	1	0
KCNH2	1.05	P1_P2_P3_P4_Lumbar_Coeliac_Sphenopalatine_VS_Stellate	1	1	1	1	1	1	0	1
LMTK3	1.05	P1_P2_P3_P4_Lumbar_Coeliac_Sphenopalatine_VS_Stellate	1	1	1	1	1	1	0	1
AY036118	1.05	P1_P2_P3_P4_Lumbar_Coeliac_Sphenopalatine_VS_Stellate	1	1	1	1	1	1	0	1
FAM13B	1.05	P1_P2_P3_P4_Lumbar_Coeliac_Sphenopalatine_VS_Stellate	1	1	1	1	1	1	0	1
PLCE1	1.04	P1_VS_P2_P3_P4_Lumbar_Coeliac_Stellate_Sphenopalatine	1	0	0	0	0	0	0	0
F2R	1.04	P2_VS_P1_P3_P4_Lumbar_Coeliac_Stellate_Sphenopalatine	0	1	0	0	0	0	0	0
STARD13	1.04	P1_P3_VS_P2_P4_Lumbar_Coeliac_Stellate_Sphenopalatine	1	0	1	0	0	0	0	0
KNTC1	1.04	P4_VS_P1_P2_P3_Lumbar_Coeliac_Stellate_Sphenopalatine	0	0	0	1	0	0	0	0
TTYH1	1.04	P4_VS_P1_P2_P3_Lumbar_Coeliac_Stellate_Sphenopalatine	0	0	0	1	0	0	0	0
BDKRB2	1.04	P4_VS_P1_P2_P3_Lumbar_Coeliac_Stellate_Sphenopalatine	0	0	0	1	0	0	0	0
PLCXD2	1.04	P4_VS_P1_P2_P3_Lumbar_Coeliac_Stellate_Sphenopalatine	0	0	0	1	0	0	0	0
TIMELESS	1.04	Lumbar_VS_P1_P2_P3_P4_Coeliac_Stellate_Sphenopalatine	0	0	0	0	1	0	0	0
MEX3A	1.04	Lumbar_Coeliac_VS_P1_P2_P3_P4_Stellate_Sphenopalatine	0	0	0	0	1	1	0	0
FGD5	1.04	Lumbar_Coeliac_VS_P1_P2_P3_P4_Stellate_Sphenopalatine	0	0	0	0	1	1	0	0
GM49700	1.04	Lumbar_Coeliac_VS_P1_P2_P3_P4_Stellate_Sphenopalatine	0	0	0	0	1	1	0	0
E430024I08RIK	1.04	Lumbar_Coeliac_VS_P1_P2_P3_P4_Stellate_Sphenopalatine	0	0	0	0	1	1	0	0
TMEM74	1.04	Lumbar_Coeliac_VS_P1_P2_P3_P4_Stellate_Sphenopalatine	0	0	0	0	1	1	0	0
PCDHA11.1	1.04	Lumbar_Coeliac_VS_P1_P2_P3_P4_Stellate_Sphenopalatine	0	0	0	0	1	1	0	0
SOCS3	1.04	P1_Sphenopalatine_VS_P2_P3_P4_Lumbar_Coeliac_Stellate	1	0	0	0	0	0	0	1
LPAR1	1.04	P4_Sphenopalatine_VS_P1_P2_P3_Lumbar_Coeliac_Stellate	0	0	0	1	0	0	0	1
RAPGEF4	1.04	P1_P2_P3_P4_Lumbar_Coeliac_Sphenopalatine_VS_Stellate	1	1	1	1	1	1	0	1
KCTD2	1.04	P1_P2_P3_P4_Lumbar_Coeliac_Sphenopalatine_VS_Stellate	1	1	1	1	1	1	0	1
UTY	1.04	P1_P2_P3_P4_Lumbar_Coeliac_Sphenopalatine_VS_Stellate	1	1	1	1	1	1	0	1
FBXO2	1.04	P1_P2_P3_P4_Stellate_Sphenopalatine_VS_Lumbar_Coeliac	1	1	1	1	0	0	1	1
KCNH1	1.04	P1_P2_P3_Lumbar_Coeliac_Stellate_Sphenopalatine_VS_P4	1	1	1	0	1	1	1	1
VSIG8	1.04	P3_P4_Lumbar_Coeliac_Stellate_Sphenopalatine_VS_P1_P2	0	0	1	1	1	1	1	1
SERPINA3G	1.03	P1_P2_VS_P3_P4_Lumbar_Coeliac_Stellate_Sphenopalatine	1	1	0	0	0	0	0	0
SSTR2	1.03	P3_VS_P1_P2_P4_Lumbar_Coeliac_Stellate_Sphenopalatine	0	0	1	0	0	0	0	0
ENC1	1.03	P3_VS_P1_P2_P4_Lumbar_Coeliac_Stellate_Sphenopalatine	0	0	1	0	0	0	0	0
OLFML2A	1.03	P4_VS_P1_P2_P3_Lumbar_Coeliac_Stellate_Sphenopalatine	0	0	0	1	0	0	0	0
CALN1	1.03	P4_VS_P1_P2_P3_Lumbar_Coeliac_Stellate_Sphenopalatine	0	0	0	1	0	0	0	0
COL26A1	1.03	P4_VS_P1_P2_P3_Lumbar_Coeliac_Stellate_Sphenopalatine	0	0	0	1	0	0	0	0
GAB1	1.03	P4_VS_P1_P2_P3_Lumbar_Coeliac_Stellate_Sphenopalatine	0	0	0	1	0	0	0	0
AMIGO2	1.03	P4_VS_P1_P2_P3_Lumbar_Coeliac_Stellate_Sphenopalatine	0	0	0	1	0	0	0	0
NECTIN3	1.03	P4_VS_P1_P2_P3_Lumbar_Coeliac_Stellate_Sphenopalatine	0	0	0	1	0	0	0	0
ABTB2	1.03	P3_Lumbar_VS_P1_P2_P4_Coeliac_Stellate_Sphenopalatine	0	0	1	0	1	0	0	0
HR	1.03	Lumbar_Coeliac_VS_P1_P2_P3_P4_Stellate_Sphenopalatine	0	0	0	0	1	1	0	0
RTN4R	1.03	P3_P4_Lumbar_Coeliac_VS_P1_P2_Stellate_Sphenopalatine	0	0	1	1	1	1	0	0
CENPV	1.03	P1_P2_P3_P4_Lumbar_Coeliac_VS_Stellate_Sphenopalatine	1	1	1	1	1	1	0	0
PVR	1.03	P1_P2_P4_Sphenopalatine_VS_P3_Lumbar_Coeliac_Stellate	1	1	0	1	0	0	0	1
ITM2A	1.03	P1_P3_P4_Sphenopalatine_VS_P2_Lumbar_Coeliac_Stellate	1	0	1	1	0	0	0	1
GM47163	1.03	P1_P2_P3_P4_Lumbar_Coeliac_Sphenopalatine_VS_Stellate	1	1	1	1	1	1	0	1
NHSL2	1.03	P1_P2_P3_P4_Lumbar_Coeliac_Sphenopalatine_VS_Stellate	1	1	1	1	1	1	0	1
IFITM10	1.03	P1_P2_P3_Lumbar_Coeliac_Stellate_Sphenopalatine_VS_P4	1	1	1	0	1	1	1	1
NFATC2	1.02	P3_VS_P1_P2_P4_Lumbar_Coeliac_Stellate_Sphenopalatine	0	0	1	0	0	0	0	0
GM11110	1.02	P4_VS_P1_P2_P3_Lumbar_Coeliac_Stellate_Sphenopalatine	0	0	0	1	0	0	0	0
BC002189	1.02	Lumbar_VS_P1_P2_P3_P4_Coeliac_Stellate_Sphenopalatine	0	0	0	0	1	0	0	0
PTPRM	1.02	Lumbar_VS_P1_P2_P3_P4_Coeliac_Stellate_Sphenopalatine	0	0	0	0	1	0	0	0
ASIC1	1.02	Coeliac_VS_P1_P2_P3_P4_Lumbar_Stellate_Sphenopalatine	0	0	0	0	0	1	0	0
TMEM196	1.02	P4_Coeliac_VS_P1_P2_P3_Lumbar_Stellate_Sphenopalatine	0	0	0	1	0	1	0	0
CTBP2	1.02	Lumbar_Coeliac_VS_P1_P2_P3_P4_Stellate_Sphenopalatine	0	0	0	0	1	1	0	0
MTA3	1.02	Lumbar_Coeliac_VS_P1_P2_P3_P4_Stellate_Sphenopalatine	0	0	0	0	1	1	0	0
GM43111	1.02	P4_Lumbar_Coeliac_VS_P1_P2_P3_Stellate_Sphenopalatine	0	0	0	1	1	1	0	0
CABLES1	1.02	P1_P4_Lumbar_Coeliac_VS_P2_P3_Stellate_Sphenopalatine	1	0	0	1	1	1	0	0
SHC3	1.02	P1_P2_P3_P4_Lumbar_Coeliac_VS_Stellate_Sphenopalatine	1	1	1	1	1	1	0	0
TMEM132C	1.02	P1_P2_P3_P4_Lumbar_Coeliac_Stellate_VS_Sphenopalatine	1	1	1	1	1	1	1	0
NXN	1.02	P1_P2_P3_P4_Lumbar_Coeliac_Stellate_VS_Sphenopalatine	1	1	1	1	1	1	1	0
SLC44A5	1.02	P1_P3_P4_Lumbar_Coeliac_Sphenopalatine_VS_P2_Stellate	1	0	1	1	1	1	0	1
NOS1AP	1.02	P1_P2_P3_P4_Lumbar_Coeliac_Sphenopalatine_VS_Stellate	1	1	1	1	1	1	0	1
IFFO2	1.02	P1_P2_P3_P4_Lumbar_Coeliac_Sphenopalatine_VS_Stellate	1	1	1	1	1	1	0	1
A330076H08RIK	1.02	P1_P2_P3_P4_Lumbar_Coeliac_Sphenopalatine_VS_Stellate	1	1	1	1	1	1	0	1
DLGAP2	1.02	P1_P2_P3_P4_Lumbar_Coeliac_Sphenopalatine_VS_Stellate	1	1	1	1	1	1	0	1
SACS	1.02	P1_P2_P3_P4_Lumbar_Coeliac_Sphenopalatine_VS_Stellate	1	1	1	1	1	1	0	1
EP300	1.02	P1_P2_P3_P4_Lumbar_Coeliac_Sphenopalatine_VS_Stellate	1	1	1	1	1	1	0	1
SMIM18	1.02	P1_P4_Lumbar_Coeliac_Stellate_Sphenopalatine_VS_P2_P3	1	0	0	1	1	1	1	1
A530058N18RIK	1.02	P1_P3_P4_Lumbar_Coeliac_Stellate_Sphenopalatine_VS_P2	1	0	1	1	1	1	1	1
GALNT5	1.01	P1_VS_P2_P3_P4_Lumbar_Coeliac_Stellate_Sphenopalatine	1	0	0	0	0	0	0	0
LGALS9	1.01	P1_P2_VS_P3_P4_Lumbar_Coeliac_Stellate_Sphenopalatine	1	1	0	0	0	0	0	0
EPHB6	1.01	P3_VS_P1_P2_P4_Lumbar_Coeliac_Stellate_Sphenopalatine	0	0	1	0	0	0	0	0
FAM92B	1.01	P4_VS_P1_P2_P3_Lumbar_Coeliac_Stellate_Sphenopalatine	0	0	0	1	0	0	0	0
1700016P03RIK	1.01	P4_VS_P1_P2_P3_Lumbar_Coeliac_Stellate_Sphenopalatine	0	0	0	1	0	0	0	0
CDH18	1.01	P4_VS_P1_P2_P3_Lumbar_Coeliac_Stellate_Sphenopalatine	0	0	0	1	0	0	0	0
CATSPERZ	1.01	P4_VS_P1_P2_P3_Lumbar_Coeliac_Stellate_Sphenopalatine	0	0	0	1	0	0	0	0
PLAAT3	1.01	P4_VS_P1_P2_P3_Lumbar_Coeliac_Stellate_Sphenopalatine	0	0	0	1	0	0	0	0
G2E3	1.01	Coeliac_VS_P1_P2_P3_P4_Lumbar_Stellate_Sphenopalatine	0	0	0	0	0	1	0	0
SORCS2	1.01	Lumbar_Coeliac_VS_P1_P2_P3_P4_Stellate_Sphenopalatine	0	0	0	0	1	1	0	0
GM9801	1.01	Lumbar_Coeliac_VS_P1_P2_P3_P4_Stellate_Sphenopalatine	0	0	0	0	1	1	0	0
ZFP711	1.01	Lumbar_Coeliac_VS_P1_P2_P3_P4_Stellate_Sphenopalatine	0	0	0	0	1	1	0	0
NGB	1.01	P3_P4_Lumbar_Coeliac_Stellate_VS_P1_P2_Sphenopalatine	0	0	1	1	1	1	1	0
ADRA2A	1.01	P1_P2_P3_P4_Lumbar_Coeliac_Stellate_VS_Sphenopalatine	1	1	1	1	1	1	1	0
TRANK1	1.01	Sphenopalatine_VS_P1_P2_P3_P4_Lumbar_Coeliac_Stellate	0	0	0	0	0	0	0	1
SEL1L3	1.01	P1_P2_Sphenopalatine_VS_P3_P4_Lumbar_Coeliac_Stellate	1	1	0	0	0	0	0	1
PCDH17	1.01	P1_P2_P3_P4_Lumbar_Sphenopalatine_VS_Coeliac_Stellate	1	1	1	1	1	0	0	1
LIX1L	1.01	P1_P2_P3_P4_Lumbar_Coeliac_Sphenopalatine_VS_Stellate	1	1	1	1	1	1	0	1
SPEN	1.01	P1_P2_P3_P4_Lumbar_Coeliac_Sphenopalatine_VS_Stellate	1	1	1	1	1	1	0	1
A230057D06RIK	1.01	P1_P2_P3_P4_Lumbar_Coeliac_Sphenopalatine_VS_Stellate	1	1	1	1	1	1	0	1
MCU	1.01	P1_P2_P3_P4_Lumbar_Coeliac_Sphenopalatine_VS_Stellate	1	1	1	1	1	1	0	1
GGTA1	1.01	P1_P2_P3_Lumbar_Coeliac_Stellate_Sphenopalatine_VS_P4	1	1	1	0	1	1	1	1
GSTM6	1.01	P1_P2_P3_Lumbar_Coeliac_Stellate_Sphenopalatine_VS_P4	1	1	1	0	1	1	1	1
STARD5	1	P3_VS_P1_P2_P4_Lumbar_Coeliac_Stellate_Sphenopalatine	0	0	1	0	0	0	0	0
FKBP11	1	P3_VS_P1_P2_P4_Lumbar_Coeliac_Stellate_Sphenopalatine	0	0	1	0	0	0	0	0
NR2F2	1	P4_VS_P1_P2_P3_Lumbar_Coeliac_Stellate_Sphenopalatine	0	0	0	1	0	0	0	0
TMEM71	1	P1_P2_P4_VS_P3_Lumbar_Coeliac_Stellate_Sphenopalatine	1	1	0	1	0	0	0	0
SAP30L	1	P1_P2_P3_P4_Lumbar_Coeliac_VS_Stellate_Sphenopalatine	1	1	1	1	1	1	0	0
SNTG1	1	P3_P4_Sphenopalatine_VS_P1_P2_Lumbar_Coeliac_Stellate	0	0	1	1	0	0	0	1
COL1A1	1	P1_P2_P3_P4_Lumbar_Coeliac_Sphenopalatine_VS_Stellate	1	1	1	1	1	1	0	1
EFNB2	1	P1_P2_P4_Lumbar_Coeliac_Stellate_Sphenopalatine_VS_P3	1	1	0	1	1	1	1	1
PDE2A	1	P1_P3_P4_Lumbar_Coeliac_Stellate_Sphenopalatine_VS_P2	1	0	1	1	1	1	1	1
GM20751	0.999	P4_VS_P1_P2_P3_Lumbar_Coeliac_Stellate_Sphenopalatine	0	0	0	1	0	0	0	0
NRP2	0.999	P1_P2_P3_P4_Lumbar_Coeliac_Stellate_VS_Sphenopalatine	1	1	1	1	1	1	1	0
GPR155	0.999	P1_P2_P3_P4_Lumbar_Coeliac_Sphenopalatine_VS_Stellate	1	1	1	1	1	1	0	1
TJP2	0.998	P4_VS_P1_P2_P3_Lumbar_Coeliac_Stellate_Sphenopalatine	0	0	0	1	0	0	0	0
SUSD4	0.998	P1_P2_P3_P4_Lumbar_Coeliac_Sphenopalatine_VS_Stellate	1	1	1	1	1	1	0	1
ZFP458	0.997	Lumbar_Coeliac_VS_P1_P2_P3_P4_Stellate_Sphenopalatine	0	0	0	0	1	1	0	0
CILP	0.995	P3_Coeliac_VS_P1_P2_P4_Lumbar_Stellate_Sphenopalatine	0	0	1	0	0	1	0	0
AU041133	0.995	Lumbar_Coeliac_VS_P1_P2_P3_P4_Stellate_Sphenopalatine	0	0	0	0	1	1	0	0
CABP1	0.995	P1_P2_P3_P4_Lumbar_Coeliac_VS_Stellate_Sphenopalatine	1	1	1	1	1	1	0	0
PTPRD	0.995	P1_P2_P4_Lumbar_Coeliac_Sphenopalatine_VS_P3_Stellate	1	1	0	1	1	1	0	1
FAM131C	0.994	Lumbar_VS_P1_P2_P3_P4_Coeliac_Stellate_Sphenopalatine	0	0	0	0	1	0	0	0
CAMK1D	0.993	P1_P2_P3_P4_Lumbar_Coeliac_Sphenopalatine_VS_Stellate	1	1	1	1	1	1	0	1
LARS2	0.993	P1_P2_P3_P4_Lumbar_Coeliac_Sphenopalatine_VS_Stellate	1	1	1	1	1	1	0	1
SERHL	0.992	P2_VS_P1_P3_P4_Lumbar_Coeliac_Stellate_Sphenopalatine	0	1	0	0	0	0	0	0
AGRP	0.992	Lumbar_VS_P1_P2_P3_P4_Coeliac_Stellate_Sphenopalatine	0	0	0	0	1	0	0	0
GPRIN3	0.992	Coeliac_VS_P1_P2_P3_P4_Lumbar_Stellate_Sphenopalatine	0	0	0	0	0	1	0	0
FAM184B	0.992	Lumbar_Coeliac_VS_P1_P2_P3_P4_Stellate_Sphenopalatine	0	0	0	0	1	1	0	0
RPS6KA2	0.991	Lumbar_Coeliac_VS_P1_P2_P3_P4_Stellate_Sphenopalatine	0	0	0	0	1	1	0	0
WDR25	0.991	Sphenopalatine_VS_P1_P2_P3_P4_Lumbar_Coeliac_Stellate	0	0	0	0	0	0	0	1
TMED8	0.99	P4_VS_P1_P2_P3_Lumbar_Coeliac_Stellate_Sphenopalatine	0	0	0	1	0	0	0	0
JRKL	0.99	Lumbar_Coeliac_VS_P1_P2_P3_P4_Stellate_Sphenopalatine	0	0	0	0	1	1	0	0
HIVEP2	0.99	P1_P2_P3_P4_Lumbar_Coeliac_Sphenopalatine_VS_Stellate	1	1	1	1	1	1	0	1
SRD5A1	0.99	P1_P2_P3_P4_Lumbar_Coeliac_Sphenopalatine_VS_Stellate	1	1	1	1	1	1	0	1
SLC7A3	0.99	P1_P2_P3_P4_Lumbar_Coeliac_Sphenopalatine_VS_Stellate	1	1	1	1	1	1	0	1
DPP10	0.989	P1_P4_Lumbar_VS_P2_P3_Coeliac_Stellate_Sphenopalatine	1	0	0	1	1	0	0	0
RBM46	0.988	P4_VS_P1_P2_P3_Lumbar_Coeliac_Stellate_Sphenopalatine	0	0	0	1	0	0	0	0
NFIB	0.988	P1_P2_P3_P4_VS_Lumbar_Coeliac_Stellate_Sphenopalatine	1	1	1	1	0	0	0	0
ELMO1	0.988	P1_P2_P3_P4_Sphenopalatine_VS_Lumbar_Coeliac_Stellate	1	1	1	1	0	0	0	1
FOSL2	0.985	P4_Sphenopalatine_VS_P1_P2_P3_Lumbar_Coeliac_Stellate	0	0	0	1	0	0	0	1
MPZ	0.984	P4_VS_P1_P2_P3_Lumbar_Coeliac_Stellate_Sphenopalatine	0	0	0	1	0	0	0	0
PLEKHA4	0.984	P4_VS_P1_P2_P3_Lumbar_Coeliac_Stellate_Sphenopalatine	0	0	0	1	0	0	0	0
ABHD4	0.984	P4_VS_P1_P2_P3_Lumbar_Coeliac_Stellate_Sphenopalatine	0	0	0	1	0	0	0	0
ABCB1A	0.983	P4_Lumbar_Coeliac_VS_P1_P2_P3_Stellate_Sphenopalatine	0	0	0	1	1	1	0	0
CRISPLD2	0.983	Sphenopalatine_VS_P1_P2_P3_P4_Lumbar_Coeliac_Stellate	0	0	0	0	0	0	0	1
ABCA8B	0.983	P1_P2_P3_P4_Lumbar_Coeliac_Sphenopalatine_VS_Stellate	1	1	1	1	1	1	0	1
YTHDC2	0.983	P1_P2_P3_P4_Lumbar_Coeliac_Sphenopalatine_VS_Stellate	1	1	1	1	1	1	0	1
PRPS2	0.981	P3_VS_P1_P2_P4_Lumbar_Coeliac_Stellate_Sphenopalatine	0	0	1	0	0	0	0	0
TM4SF4	0.98	P1_P3_P4_Lumbar_Coeliac_Stellate_VS_P2_Sphenopalatine	1	0	1	1	1	1	1	0
B230209E15RIK	0.98	P1_P2_P3_P4_Lumbar_Coeliac_Sphenopalatine_VS_Stellate	1	1	1	1	1	1	0	1
ADAMTS1	0.978	P4_VS_P1_P2_P3_Lumbar_Coeliac_Stellate_Sphenopalatine	0	0	0	1	0	0	0	0
PTPRJ	0.973	P3_VS_P1_P2_P4_Lumbar_Coeliac_Stellate_Sphenopalatine	0	0	1	0	0	0	0	0
ITPR1	0.973	P3_P4_VS_P1_P2_Lumbar_Coeliac_Stellate_Sphenopalatine	0	0	1	1	0	0	0	0
MC4R	0.972	P4_VS_P1_P2_P3_Lumbar_Coeliac_Stellate_Sphenopalatine	0	0	0	1	0	0	0	0
RAB11FIP3	0.972	P1_P2_P3_P4_Lumbar_Coeliac_Sphenopalatine_VS_Stellate	1	1	1	1	1	1	0	1
NOTCH2	0.971	P4_VS_P1_P2_P3_Lumbar_Coeliac_Stellate_Sphenopalatine	0	0	0	1	0	0	0	0
PTPN13	0.971	P4_VS_P1_P2_P3_Lumbar_Coeliac_Stellate_Sphenopalatine	0	0	0	1	0	0	0	0
GM38593	0.971	P4_VS_P1_P2_P3_Lumbar_Coeliac_Stellate_Sphenopalatine	0	0	0	1	0	0	0	0
GM9866	0.971	P1_P2_P4_Lumbar_Coeliac_Stellate_Sphenopalatine_VS_P3	1	1	0	1	1	1	1	1
2310001H17RIK	0.97	Sphenopalatine_VS_P1_P2_P3_P4_Lumbar_Coeliac_Stellate	0	0	0	0	0	0	0	1
FHOD3	0.97	P1_P2_P3_P4_Lumbar_Coeliac_Sphenopalatine_VS_Stellate	1	1	1	1	1	1	0	1
KCNS2	0.969	Lumbar_VS_P1_P2_P3_P4_Coeliac_Stellate_Sphenopalatine	0	0	0	0	1	0	0	0
SRCAP	0.969	Lumbar_Coeliac_VS_P1_P2_P3_P4_Stellate_Sphenopalatine	0	0	0	0	1	1	0	0
RAB27A	0.969	P3_P4_Lumbar_Coeliac_VS_P1_P2_Stellate_Sphenopalatine	0	0	1	1	1	1	0	0
PQLC3	0.968	P4_VS_P1_P2_P3_Lumbar_Coeliac_Stellate_Sphenopalatine	0	0	0	1	0	0	0	0
FBLN5	0.968	P4_VS_P1_P2_P3_Lumbar_Coeliac_Stellate_Sphenopalatine	0	0	0	1	0	0	0	0
S100A1	0.967	P1_P2_P3_P4_Lumbar_Coeliac_Stellate_VS_Sphenopalatine	1	1	1	1	1	1	1	0
MAGI2	0.967	P1_P2_P3_P4_Lumbar_Coeliac_Sphenopalatine_VS_Stellate	1	1	1	1	1	1	0	1
KCNJ12	0.967	P1_P2_P3_P4_Lumbar_Coeliac_Sphenopalatine_VS_Stellate	1	1	1	1	1	1	0	1
SHANK3	0.965	Lumbar_Coeliac_VS_P1_P2_P3_P4_Stellate_Sphenopalatine	0	0	0	0	1	1	0	0
GLCE	0.963	P2_VS_P1_P3_P4_Lumbar_Coeliac_Stellate_Sphenopalatine	0	1	0	0	0	0	0	0
SKAP2	0.963	P4_VS_P1_P2_P3_Lumbar_Coeliac_Stellate_Sphenopalatine	0	0	0	1	0	0	0	0
IL7	0.962	P4_VS_P1_P2_P3_Lumbar_Coeliac_Stellate_Sphenopalatine	0	0	0	1	0	0	0	0
BRWD3	0.962	Lumbar_Coeliac_VS_P1_P2_P3_P4_Stellate_Sphenopalatine	0	0	0	0	1	1	0	0
PCDH9	0.962	P1_P2_P3_Lumbar_Coeliac_Stellate_Sphenopalatine_VS_P4	1	1	1	0	1	1	1	1
P4HA3	0.961	P1_P2_P3_P4_Lumbar_Coeliac_Sphenopalatine_VS_Stellate	1	1	1	1	1	1	0	1
LEMD2	0.961	P1_P2_P3_P4_Lumbar_Coeliac_Sphenopalatine_VS_Stellate	1	1	1	1	1	1	0	1
ARHGAP24	0.96	P4_VS_P1_P2_P3_Lumbar_Coeliac_Stellate_Sphenopalatine	0	0	0	1	0	0	0	0
MMD2	0.96	P4_VS_P1_P2_P3_Lumbar_Coeliac_Stellate_Sphenopalatine	0	0	0	1	0	0	0	0
GM26532	0.96	P1_P2_P3_P4_Lumbar_Coeliac_Sphenopalatine_VS_Stellate	1	1	1	1	1	1	0	1
3010003L21RIK	0.959	Lumbar_VS_P1_P2_P3_P4_Coeliac_Stellate_Sphenopalatine	0	0	0	0	1	0	0	0
PLCL1	0.958	Sphenopalatine_VS_P1_P2_P3_P4_Lumbar_Coeliac_Stellate	0	0	0	0	0	0	0	1
LIN7A	0.958	P1_P3_P4_Coeliac_Sphenopalatine_VS_P2_Lumbar_Stellate	1	0	1	1	0	1	0	1
KCTD6	0.958	P1_P2_P3_P4_Lumbar_Coeliac_Sphenopalatine_VS_Stellate	1	1	1	1	1	1	0	1
EFCAB1	0.956	P3_P4_Lumbar_Coeliac_VS_P1_P2_Stellate_Sphenopalatine	0	0	1	1	1	1	0	0
HECW2	0.953	P1_P2_P3_P4_Lumbar_Coeliac_Sphenopalatine_VS_Stellate	1	1	1	1	1	1	0	1
PEAK1	0.952	P1_P2_P3_P4_Lumbar_Coeliac_Sphenopalatine_VS_Stellate	1	1	1	1	1	1	0	1
GM5165	0.951	Coeliac_VS_P1_P2_P3_P4_Lumbar_Stellate_Sphenopalatine	0	0	0	0	0	1	0	0
EFNB3	0.951	P3_Lumbar_Coeliac_VS_P1_P2_P4_Stellate_Sphenopalatine	0	0	1	0	1	1	0	0
BCORL1	0.949	P1_P2_P3_P4_Lumbar_Coeliac_Sphenopalatine_VS_Stellate	1	1	1	1	1	1	0	1
PLCH1	0.948	P4_VS_P1_P2_P3_Lumbar_Coeliac_Stellate_Sphenopalatine	0	0	0	1	0	0	0	0
ATG9B	0.948	P4_VS_P1_P2_P3_Lumbar_Coeliac_Stellate_Sphenopalatine	0	0	0	1	0	0	0	0
RNASET2B	0.948	Coeliac_VS_P1_P2_P3_P4_Lumbar_Stellate_Sphenopalatine	0	0	0	0	0	1	0	0
CRIM1	0.947	P1_VS_P2_P3_P4_Lumbar_Coeliac_Stellate_Sphenopalatine	1	0	0	0	0	0	0	0
GM30382	0.947	P1_P2_VS_P3_P4_Lumbar_Coeliac_Stellate_Sphenopalatine	1	1	0	0	0	0	0	0
SSC5D	0.947	P2_Sphenopalatine_VS_P1_P3_P4_Lumbar_Coeliac_Stellate	0	1	0	0	0	0	0	1
LARP1B	0.947	P1_P2_P3_P4_Lumbar_Coeliac_Sphenopalatine_VS_Stellate	1	1	1	1	1	1	0	1
PPP1R12C	0.947	P1_P2_P3_P4_Lumbar_Coeliac_Sphenopalatine_VS_Stellate	1	1	1	1	1	1	0	1
TMEM91	0.945	P3_P4_Lumbar_Coeliac_Stellate_Sphenopalatine_VS_P1_P2	0	0	1	1	1	1	1	1
SYT12	0.944	P1_VS_P2_P3_P4_Lumbar_Coeliac_Stellate_Sphenopalatine	1	0	0	0	0	0	0	0
PAKAP	0.944	Lumbar_VS_P1_P2_P3_P4_Coeliac_Stellate_Sphenopalatine	0	0	0	0	1	0	0	0
CRYM	0.944	P4_Lumbar_Coeliac_Stellate_VS_P1_P2_P3_Sphenopalatine	0	0	0	1	1	1	1	0
SEZ6L	0.944	P1_P2_P3_P4_Lumbar_Coeliac_Sphenopalatine_VS_Stellate	1	1	1	1	1	1	0	1
CLIP4	0.944	P1_P2_P3_P4_Lumbar_Coeliac_Sphenopalatine_VS_Stellate	1	1	1	1	1	1	0	1
BDH2	0.941	P1_VS_P2_P3_P4_Lumbar_Coeliac_Stellate_Sphenopalatine	1	0	0	0	0	0	0	0
KAT6A	0.941	Lumbar_Coeliac_VS_P1_P2_P3_P4_Stellate_Sphenopalatine	0	0	0	0	1	1	0	0
IL13RA1	0.941	P1_P2_Lumbar_Coeliac_Stellate_Sphenopalatine_VS_P3_P4	1	1	0	0	1	1	1	1
2310010J17RIK	0.94	P1_P2_P3_P4_Lumbar_Coeliac_Sphenopalatine_VS_Stellate	1	1	1	1	1	1	0	1
LPIN2	0.94	P1_P2_P3_P4_Lumbar_Coeliac_Sphenopalatine_VS_Stellate	1	1	1	1	1	1	0	1
TMEM200A	0.94	P2_P3_P4_Lumbar_Coeliac_Stellate_Sphenopalatine_VS_P1	0	1	1	1	1	1	1	1
MYH9	0.939	P1_P2_P3_P4_Lumbar_Coeliac_Sphenopalatine_VS_Stellate	1	1	1	1	1	1	0	1
KLF5	0.938	P3_Lumbar_VS_P1_P2_P4_Coeliac_Stellate_Sphenopalatine	0	0	1	0	1	0	0	0
TDRD7	0.938	P1_P2_P3_P4_Lumbar_Coeliac_Sphenopalatine_VS_Stellate	1	1	1	1	1	1	0	1
ENTPD2	0.937	P4_VS_P1_P2_P3_Lumbar_Coeliac_Stellate_Sphenopalatine	0	0	0	1	0	0	0	0
AXIN2	0.937	Coeliac_VS_P1_P2_P3_P4_Lumbar_Stellate_Sphenopalatine	0	0	0	0	0	1	0	0
RIMKLB	0.937	P1_P3_P4_Lumbar_Coeliac_Sphenopalatine_VS_P2_Stellate	1	0	1	1	1	1	0	1
TRIM68	0.937	P1_P2_P3_P4_Lumbar_Coeliac_Sphenopalatine_VS_Stellate	1	1	1	1	1	1	0	1
GM47018	0.936	Sphenopalatine_VS_P1_P2_P3_P4_Lumbar_Coeliac_Stellate	0	0	0	0	0	0	0	1
MAP3K3	0.936	P1_P2_P3_P4_Lumbar_Coeliac_Sphenopalatine_VS_Stellate	1	1	1	1	1	1	0	1
BHLHE40	0.935	P3_VS_P1_P2_P4_Lumbar_Coeliac_Stellate_Sphenopalatine	0	0	1	0	0	0	0	0
LIMD1	0.934	P2_VS_P1_P3_P4_Lumbar_Coeliac_Stellate_Sphenopalatine	0	1	0	0	0	0	0	0
PTPRG	0.934	P1_P2_P3_P4_VS_Lumbar_Coeliac_Stellate_Sphenopalatine	1	1	1	1	0	0	0	0
OLFML3	0.934	P1_P4_Sphenopalatine_VS_P2_P3_Lumbar_Coeliac_Stellate	1	0	0	1	0	0	0	1
PPP1R1C	0.932	P3_VS_P1_P2_P4_Lumbar_Coeliac_Stellate_Sphenopalatine	0	0	1	0	0	0	0	0
SH3BGR	0.931	P4_VS_P1_P2_P3_Lumbar_Coeliac_Stellate_Sphenopalatine	0	0	0	1	0	0	0	0
MMP2	0.931	P3_Lumbar_Coeliac_Stellate_VS_P1_P2_P4_Sphenopalatine	0	0	1	0	1	1	1	0
FAM184A	0.931	P1_P2_P3_P4_Lumbar_Coeliac_Sphenopalatine_VS_Stellate	1	1	1	1	1	1	0	1
TMEM161B	0.931	P1_P2_P3_P4_Lumbar_Coeliac_Sphenopalatine_VS_Stellate	1	1	1	1	1	1	0	1
CPEB3	0.931	P1_P2_P3_P4_Lumbar_Coeliac_Sphenopalatine_VS_Stellate	1	1	1	1	1	1	0	1
ADRB2	0.931	P1_P4_Lumbar_Coeliac_Stellate_Sphenopalatine_VS_P2_P3	1	0	0	1	1	1	1	1
BAMBI	0.93	P2_VS_P1_P3_P4_Lumbar_Coeliac_Stellate_Sphenopalatine	0	1	0	0	0	0	0	0
SYT14	0.928	P1_P2_P3_P4_Lumbar_Coeliac_Sphenopalatine_VS_Stellate	1	1	1	1	1	1	0	1
SLIT2	0.928	P1_P2_P3_P4_Lumbar_Coeliac_Sphenopalatine_VS_Stellate	1	1	1	1	1	1	0	1
HSPG2	0.927	P4_VS_P1_P2_P3_Lumbar_Coeliac_Stellate_Sphenopalatine	0	0	0	1	0	0	0	0
ITGB6	0.926	P2_VS_P1_P3_P4_Lumbar_Coeliac_Stellate_Sphenopalatine	0	1	0	0	0	0	0	0
HAAO	0.925	P4_VS_P1_P2_P3_Lumbar_Coeliac_Stellate_Sphenopalatine	0	0	0	1	0	0	0	0
TMEM54	0.924	P2_P3_P4_VS_P1_Lumbar_Coeliac_Stellate_Sphenopalatine	0	1	1	1	0	0	0	0
CDK5RAP2	0.924	Lumbar_Coeliac_VS_P1_P2_P3_P4_Stellate_Sphenopalatine	0	0	0	0	1	1	0	0
GM42941	0.923	P1_P2_P3_P4_Lumbar_Coeliac_VS_Stellate_Sphenopalatine	1	1	1	1	1	1	0	0
BACE2	0.923	P1_P2_P3_Sphenopalatine_VS_P4_Lumbar_Coeliac_Stellate	1	1	1	0	0	0	0	1
IQSEC1	0.923	P1_P2_P3_P4_Lumbar_Coeliac_Sphenopalatine_VS_Stellate	1	1	1	1	1	1	0	1
EPB41L4B	0.922	P1_P2_P3_P4_Lumbar_Coeliac_Sphenopalatine_VS_Stellate	1	1	1	1	1	1	0	1
TMTC4	0.922	P1_P2_P3_P4_Lumbar_Coeliac_Sphenopalatine_VS_Stellate	1	1	1	1	1	1	0	1
CRNKL1	0.921	Lumbar_Coeliac_VS_P1_P2_P3_P4_Stellate_Sphenopalatine	0	0	0	0	1	1	0	0
NANOS3	0.921	P1_P2_P3_P4_Lumbar_Coeliac_Sphenopalatine_VS_Stellate	1	1	1	1	1	1	0	1
SORL1	0.92	P1_P2_P4_VS_P3_Lumbar_Coeliac_Stellate_Sphenopalatine	1	1	0	1	0	0	0	0
FGD3	0.92	Lumbar_VS_P1_P2_P3_P4_Coeliac_Stellate_Sphenopalatine	0	0	0	0	1	0	0	0
HEATR5B	0.92	Lumbar_Coeliac_VS_P1_P2_P3_P4_Stellate_Sphenopalatine	0	0	0	0	1	1	0	0
OFD1	0.92	Lumbar_Coeliac_VS_P1_P2_P3_P4_Stellate_Sphenopalatine	0	0	0	0	1	1	0	0
BCL9	0.92	P1_P2_P3_P4_Lumbar_Coeliac_Sphenopalatine_VS_Stellate	1	1	1	1	1	1	0	1
SLC9A3R1	0.919	P4_VS_P1_P2_P3_Lumbar_Coeliac_Stellate_Sphenopalatine	0	0	0	1	0	0	0	0
PCSK5	0.919	P4_VS_P1_P2_P3_Lumbar_Coeliac_Stellate_Sphenopalatine	0	0	0	1	0	0	0	0
SLC16A11	0.919	P4_Lumbar_VS_P1_P2_P3_Coeliac_Stellate_Sphenopalatine	0	0	0	1	1	0	0	0
DHX8	0.919	P1_P2_P3_P4_Lumbar_Coeliac_Sphenopalatine_VS_Stellate	1	1	1	1	1	1	0	1
MAST4	0.918	P1_P2_P4_Sphenopalatine_VS_P3_Lumbar_Coeliac_Stellate	1	1	0	1	0	0	0	1
MORC3	0.917	P1_P2_P3_P4_Lumbar_Coeliac_Sphenopalatine_VS_Stellate	1	1	1	1	1	1	0	1
DQX1	0.916	Coeliac_VS_P1_P2_P3_P4_Lumbar_Stellate_Sphenopalatine	0	0	0	0	0	1	0	0
HMGN5	0.916	P3_Lumbar_Coeliac_VS_P1_P2_P4_Stellate_Sphenopalatine	0	0	1	0	1	1	0	0
CASP8AP2	0.915	Lumbar_Coeliac_VS_P1_P2_P3_P4_Stellate_Sphenopalatine	0	0	0	0	1	1	0	0
SPRED1	0.915	P1_P2_P3_P4_Lumbar_Coeliac_Sphenopalatine_VS_Stellate	1	1	1	1	1	1	0	1
PDCD7	0.915	P1_P2_P3_P4_Lumbar_Coeliac_Sphenopalatine_VS_Stellate	1	1	1	1	1	1	0	1
FZD5	0.913	P1_P2_P3_P4_Lumbar_Coeliac_VS_Stellate_Sphenopalatine	1	1	1	1	1	1	0	0
SQOR	0.912	Sphenopalatine_VS_P1_P2_P3_P4_Lumbar_Coeliac_Stellate	0	0	0	0	0	0	0	1
CDYL	0.911	Lumbar_Coeliac_VS_P1_P2_P3_P4_Stellate_Sphenopalatine	0	0	0	0	1	1	0	0
ASAP2	0.911	Coeliac_Sphenopalatine_VS_P1_P2_P3_P4_Lumbar_Stellate	0	0	0	0	0	1	0	1
LRRC4	0.91	P4_VS_P1_P2_P3_Lumbar_Coeliac_Stellate_Sphenopalatine	0	0	0	1	0	0	0	0
PDPR	0.91	P1_P2_P3_P4_Lumbar_Coeliac_VS_Stellate_Sphenopalatine	1	1	1	1	1	1	0	0
GM10638	0.909	P1_P2_P3_P4_Lumbar_Coeliac_VS_Stellate_Sphenopalatine	1	1	1	1	1	1	0	0
MAPK4	0.909	P1_P2_P3_P4_Lumbar_Coeliac_VS_Stellate_Sphenopalatine	1	1	1	1	1	1	0	0
ARHGEF10L	0.909	P1_P2_P3_P4_Lumbar_Coeliac_Sphenopalatine_VS_Stellate	1	1	1	1	1	1	0	1
CYP4V3	0.908	P2_VS_P1_P3_P4_Lumbar_Coeliac_Stellate_Sphenopalatine	0	1	0	0	0	0	0	0
SGTB	0.908	P1_P2_P3_P4_Lumbar_Coeliac_VS_Stellate_Sphenopalatine	1	1	1	1	1	1	0	0
RHOBTB3	0.907	P1_P2_P3_P4_Lumbar_Coeliac_VS_Stellate_Sphenopalatine	1	1	1	1	1	1	0	0
MAP3K1	0.907	P1_P2_P3_P4_Lumbar_Coeliac_Sphenopalatine_VS_Stellate	1	1	1	1	1	1	0	1
GM28523	0.906	P3_Lumbar_Coeliac_VS_P1_P2_P4_Stellate_Sphenopalatine	0	0	1	0	1	1	0	0
MYL4	0.906	P3_P4_Lumbar_Coeliac_Stellate_VS_P1_P2_Sphenopalatine	0	0	1	1	1	1	1	0
TRP53I11	0.906	P1_Lumbar_Sphenopalatine_VS_P2_P3_P4_Coeliac_Stellate	1	0	0	0	1	0	0	1
MARCH9	0.906	P1_P2_P3_P4_Lumbar_Coeliac_Sphenopalatine_VS_Stellate	1	1	1	1	1	1	0	1
UPRT	0.905	Lumbar_Coeliac_VS_P1_P2_P3_P4_Stellate_Sphenopalatine	0	0	0	0	1	1	0	0
NETO2	0.905	P1_P2_P3_P4_Lumbar_Coeliac_Stellate_VS_Sphenopalatine	1	1	1	1	1	1	1	0
BRSK2	0.904	P1_P2_P3_P4_Lumbar_Coeliac_Sphenopalatine_VS_Stellate	1	1	1	1	1	1	0	1
DIAPH1	0.904	P1_P2_P3_P4_Lumbar_Coeliac_Sphenopalatine_VS_Stellate	1	1	1	1	1	1	0	1
STAT6	0.904	P1_P2_P4_Lumbar_Coeliac_Stellate_Sphenopalatine_VS_P3	1	1	0	1	1	1	1	1
CDA	0.904	P3_P4_Lumbar_Coeliac_Stellate_Sphenopalatine_VS_P1_P2	0	0	1	1	1	1	1	1
RARA	0.903	P1_P2_P3_P4_Lumbar_Coeliac_Sphenopalatine_VS_Stellate	1	1	1	1	1	1	0	1
NOC3L	0.903	P1_P2_P3_P4_Lumbar_Coeliac_Sphenopalatine_VS_Stellate	1	1	1	1	1	1	0	1
CMTM5	0.902	P4_VS_P1_P2_P3_Lumbar_Coeliac_Stellate_Sphenopalatine	0	0	0	1	0	0	0	0
PGGHG	0.902	P1_P2_P3_Lumbar_Coeliac_Stellate_VS_P4_Sphenopalatine	1	1	1	0	1	1	1	0
RBM26	0.902	P1_P2_P3_P4_Lumbar_Coeliac_Sphenopalatine_VS_Stellate	1	1	1	1	1	1	0	1
SMC2OS	0.901	Lumbar_Coeliac_VS_P1_P2_P3_P4_Stellate_Sphenopalatine	0	0	0	0	1	1	0	0
CALB1	0.901	P1_P2_P3_Lumbar_Coeliac_Sphenopalatine_VS_P4_Stellate	1	1	1	0	1	1	0	1
RASL11A	0.901	P1_P2_P3_P4_Lumbar_Coeliac_Sphenopalatine_VS_Stellate	1	1	1	1	1	1	0	1
GM15860	0.899	P4_VS_P1_P2_P3_Lumbar_Coeliac_Stellate_Sphenopalatine	0	0	0	1	0	0	0	0
IL4RA	0.899	P4_VS_P1_P2_P3_Lumbar_Coeliac_Stellate_Sphenopalatine	0	0	0	1	0	0	0	0
ZFP746	0.899	P1_P2_P3_P4_Lumbar_Coeliac_Sphenopalatine_VS_Stellate	1	1	1	1	1	1	0	1
TAF5	0.898	Lumbar_Coeliac_VS_P1_P2_P3_P4_Stellate_Sphenopalatine	0	0	0	0	1	1	0	0
SAA2	0.897	Coeliac_VS_P1_P2_P3_P4_Lumbar_Stellate_Sphenopalatine	0	0	0	0	0	1	0	0
SLC27A6	0.897	P4_Lumbar_Coeliac_VS_P1_P2_P3_Stellate_Sphenopalatine	0	0	0	1	1	1	0	0
ITGB8	0.896	P4_VS_P1_P2_P3_Lumbar_Coeliac_Stellate_Sphenopalatine	0	0	0	1	0	0	0	0
ZFP36L1	0.895	P4_VS_P1_P2_P3_Lumbar_Coeliac_Stellate_Sphenopalatine	0	0	0	1	0	0	0	0
MRTFB	0.895	P1_P2_P3_P4_Lumbar_Coeliac_Sphenopalatine_VS_Stellate	1	1	1	1	1	1	0	1
KCNH7	0.895	P4_Lumbar_Coeliac_Stellate_Sphenopalatine_VS_P1_P2_P3	0	0	0	1	1	1	1	1
TSHZ1	0.895	P1_P2_P4_Lumbar_Coeliac_Stellate_Sphenopalatine_VS_P3	1	1	0	1	1	1	1	1
ADGRE1	0.894	P1_P2_P3_P4_Coeliac_Stellate_Sphenopalatine_VS_Lumbar	1	1	1	1	0	1	1	1
OGN	0.892	P4_VS_P1_P2_P3_Lumbar_Coeliac_Stellate_Sphenopalatine	0	0	0	1	0	0	0	0
RNF152	0.892	P2_P4_VS_P1_P3_Lumbar_Coeliac_Stellate_Sphenopalatine	0	1	0	1	0	0	0	0
CUX2	0.892	P1_P2_P3_P4_Lumbar_Coeliac_Sphenopalatine_VS_Stellate	1	1	1	1	1	1	0	1
KNDC1	0.892	P1_P2_P3_P4_Lumbar_Coeliac_Sphenopalatine_VS_Stellate	1	1	1	1	1	1	0	1
STARD10	0.89	P1_P2_P3_P4_Lumbar_Coeliac_Sphenopalatine_VS_Stellate	1	1	1	1	1	1	0	1
SH3KBP1	0.89	P1_P2_P3_P4_Lumbar_Coeliac_Sphenopalatine_VS_Stellate	1	1	1	1	1	1	0	1
SLC9A9	0.889	P1_P2_P3_P4_Lumbar_Coeliac_Sphenopalatine_VS_Stellate	1	1	1	1	1	1	0	1
UBE2QL1	0.888	P1_P2_Lumbar_Coeliac_Sphenopalatine_VS_P3_P4_Stellate	1	1	0	0	1	1	0	1
LACTB2	0.885	Lumbar_VS_P1_P2_P3_P4_Coeliac_Stellate_Sphenopalatine	0	0	0	0	1	0	0	0
MAP7	0.885	P1_P2_P3_P4_Lumbar_Coeliac_VS_Stellate_Sphenopalatine	1	1	1	1	1	1	0	0
SAMD9L	0.884	P3_VS_P1_P2_P4_Lumbar_Coeliac_Stellate_Sphenopalatine	0	0	1	0	0	0	0	0
CEP290	0.884	Lumbar_Coeliac_VS_P1_P2_P3_P4_Stellate_Sphenopalatine	0	0	0	0	1	1	0	0
PPP1R3F	0.884	P1_P2_P3_P4_Lumbar_Coeliac_Sphenopalatine_VS_Stellate	1	1	1	1	1	1	0	1
SHISA2	0.883	P3_Lumbar_Coeliac_Stellate_VS_P1_P2_P4_Sphenopalatine	0	0	1	0	1	1	1	0
ZDHHC5	0.883	P1_P2_P3_P4_Lumbar_Coeliac_Sphenopalatine_VS_Stellate	1	1	1	1	1	1	0	1
CLCN5	0.883	P1_P2_P3_P4_Lumbar_Coeliac_Sphenopalatine_VS_Stellate	1	1	1	1	1	1	0	1
CC2D2A	0.882	Coeliac_VS_P1_P2_P3_P4_Lumbar_Stellate_Sphenopalatine	0	0	0	0	0	1	0	0
CRLS1	0.882	P1_P2_P3_P4_Lumbar_Coeliac_Sphenopalatine_VS_Stellate	1	1	1	1	1	1	0	1
PIK3CB	0.882	P1_P2_P3_P4_Lumbar_Coeliac_Sphenopalatine_VS_Stellate	1	1	1	1	1	1	0	1
ITGAV	0.881	P4_VS_P1_P2_P3_Lumbar_Coeliac_Stellate_Sphenopalatine	0	0	0	1	0	0	0	0
NSUN6	0.881	Lumbar_Coeliac_VS_P1_P2_P3_P4_Stellate_Sphenopalatine	0	0	0	0	1	1	0	0
KCNN2	0.881	P1_P2_P3_P4_Lumbar_Coeliac_Sphenopalatine_VS_Stellate	1	1	1	1	1	1	0	1
ARSB	0.88	P4_VS_P1_P2_P3_Lumbar_Coeliac_Stellate_Sphenopalatine	0	0	0	1	0	0	0	0
BEGAIN	0.88	Sphenopalatine_VS_P1_P2_P3_P4_Lumbar_Coeliac_Stellate	0	0	0	0	0	0	0	1
ENTPD7	0.879	Lumbar_Coeliac_VS_P1_P2_P3_P4_Stellate_Sphenopalatine	0	0	0	0	1	1	0	0
PRKAB2	0.879	P1_P2_P3_P4_Lumbar_Coeliac_Sphenopalatine_VS_Stellate	1	1	1	1	1	1	0	1
SYN3	0.878	P1_P2_P3_P4_Lumbar_Coeliac_Sphenopalatine_VS_Stellate	1	1	1	1	1	1	0	1
TCF20	0.878	P1_P2_P3_P4_Lumbar_Coeliac_Sphenopalatine_VS_Stellate	1	1	1	1	1	1	0	1
OPTC	0.877	P1_VS_P2_P3_P4_Lumbar_Coeliac_Stellate_Sphenopalatine	1	0	0	0	0	0	0	0
SLC22A4	0.877	Lumbar_Coeliac_VS_P1_P2_P3_P4_Stellate_Sphenopalatine	0	0	0	0	1	1	0	0
TNKS1BP1	0.876	P1_P2_P3_P4_Lumbar_Coeliac_Sphenopalatine_VS_Stellate	1	1	1	1	1	1	0	1
PLEKHA3	0.875	P1_P2_P3_P4_Lumbar_Coeliac_Sphenopalatine_VS_Stellate	1	1	1	1	1	1	0	1
TSPAN9	0.875	Lumbar_Coeliac_Stellate_Sphenopalatine_VS_P1_P2_P3_P4	0	0	0	0	1	1	1	1
ALK	0.874	P1_P3_P4_Lumbar_Sphenopalatine_VS_P2_Coeliac_Stellate	1	0	1	1	1	0	0	1
PTPRT	0.873	P2_VS_P1_P3_P4_Lumbar_Coeliac_Stellate_Sphenopalatine	0	1	0	0	0	0	0	0
KLHL5	0.873	P3_P4_Lumbar_Coeliac_VS_P1_P2_Stellate_Sphenopalatine	0	0	1	1	1	1	0	0
PDS5B	0.873	P1_P2_P3_P4_Lumbar_Coeliac_Sphenopalatine_VS_Stellate	1	1	1	1	1	1	0	1
NLRX1	0.872	P3_VS_P1_P2_P4_Lumbar_Coeliac_Stellate_Sphenopalatine	0	0	1	0	0	0	0	0
UTP14B	0.872	P1_P2_P3_P4_Lumbar_Coeliac_Sphenopalatine_VS_Stellate	1	1	1	1	1	1	0	1
NIN	0.872	P1_P2_P3_P4_Lumbar_Coeliac_Sphenopalatine_VS_Stellate	1	1	1	1	1	1	0	1
ZDHHC18	0.871	P1_P2_P3_P4_Lumbar_Coeliac_Sphenopalatine_VS_Stellate	1	1	1	1	1	1	0	1
JAZF1	0.871	P1_P2_P3_P4_Lumbar_Coeliac_Sphenopalatine_VS_Stellate	1	1	1	1	1	1	0	1
GABRG2	0.871	P1_P2_P3_P4_Lumbar_Coeliac_Sphenopalatine_VS_Stellate	1	1	1	1	1	1	0	1
SERPINH1	0.87	P4_VS_P1_P2_P3_Lumbar_Coeliac_Stellate_Sphenopalatine	0	0	0	1	0	0	0	0
CD44	0.87	P1_P2_P4_Lumbar_Coeliac_Sphenopalatine_VS_P3_Stellate	1	1	0	1	1	1	0	1
LYPD1	0.869	P4_VS_P1_P2_P3_Lumbar_Coeliac_Stellate_Sphenopalatine	0	0	0	1	0	0	0	0
CCBE1	0.869	Sphenopalatine_VS_P1_P2_P3_P4_Lumbar_Coeliac_Stellate	0	0	0	0	0	0	0	1
BCL9L	0.869	P1_P2_P3_P4_Lumbar_Coeliac_Sphenopalatine_VS_Stellate	1	1	1	1	1	1	0	1
SYNJ2	0.868	P4_VS_P1_P2_P3_Lumbar_Coeliac_Stellate_Sphenopalatine	0	0	0	1	0	0	0	0
SV2B	0.867	P1_Sphenopalatine_VS_P2_P3_P4_Lumbar_Coeliac_Stellate	1	0	0	0	0	0	0	1
NRXN3	0.867	P1_P2_P4_Lumbar_Sphenopalatine_VS_P3_Coeliac_Stellate	1	1	0	1	1	0	0	1
PRTG	0.866	P1_VS_P2_P3_P4_Lumbar_Coeliac_Stellate_Sphenopalatine	1	0	0	0	0	0	0	0
PLXNB1	0.866	P1_P2_P3_P4_Lumbar_Coeliac_Stellate_VS_Sphenopalatine	1	1	1	1	1	1	1	0
IL6ST	0.863	P1_P2_P3_P4_Lumbar_Coeliac_Sphenopalatine_VS_Stellate	1	1	1	1	1	1	0	1
ISYNA1	0.863	P1_P3_P4_Lumbar_Coeliac_Stellate_Sphenopalatine_VS_P2	1	0	1	1	1	1	1	1
GPSM3	0.862	P3_VS_P1_P2_P4_Lumbar_Coeliac_Stellate_Sphenopalatine	0	0	1	0	0	0	0	0
MB21D2	0.862	P1_P2_P3_P4_Lumbar_Coeliac_Sphenopalatine_VS_Stellate	1	1	1	1	1	1	0	1
PLCL2	0.861	P1_P3_P4_Coeliac_Sphenopalatine_VS_P2_Lumbar_Stellate	1	0	1	1	0	1	0	1
CTSK	0.86	P4_VS_P1_P2_P3_Lumbar_Coeliac_Stellate_Sphenopalatine	0	0	0	1	0	0	0	0
CPA2	0.86	P4_VS_P1_P2_P3_Lumbar_Coeliac_Stellate_Sphenopalatine	0	0	0	1	0	0	0	0
FAM107B	0.86	P1_P2_P4_Lumbar_Coeliac_VS_P3_Stellate_Sphenopalatine	1	1	0	1	1	1	0	0
DGKI	0.86	P1_P2_P3_P4_Lumbar_Coeliac_VS_Stellate_Sphenopalatine	1	1	1	1	1	1	0	0
NUP98	0.859	P1_P2_P3_P4_Lumbar_Coeliac_Sphenopalatine_VS_Stellate	1	1	1	1	1	1	0	1
TFDP2	0.859	P1_P2_P3_P4_Lumbar_Coeliac_Sphenopalatine_VS_Stellate	1	1	1	1	1	1	0	1
S100A6	0.858	P3_VS_P1_P2_P4_Lumbar_Coeliac_Stellate_Sphenopalatine	0	0	1	0	0	0	0	0
NOL4	0.858	Coeliac_VS_P1_P2_P3_P4_Lumbar_Stellate_Sphenopalatine	0	0	0	0	0	1	0	0
CITED1	0.858	P3_Sphenopalatine_VS_P1_P2_P4_Lumbar_Coeliac_Stellate	0	0	1	0	0	0	0	1
SIRT1	0.858	P1_P2_P3_P4_Lumbar_Coeliac_Sphenopalatine_VS_Stellate	1	1	1	1	1	1	0	1
LONRF1	0.857	P1_P2_P3_P4_Lumbar_Coeliac_Sphenopalatine_VS_Stellate	1	1	1	1	1	1	0	1
KLHDC8A	0.856	Sphenopalatine_VS_P1_P2_P3_P4_Lumbar_Coeliac_Stellate	0	0	0	0	0	0	0	1
ZFP40	0.856	P1_P2_P3_P4_Lumbar_Coeliac_Sphenopalatine_VS_Stellate	1	1	1	1	1	1	0	1
ASIC2	0.855	P1_P2_P3_P4_Lumbar_Coeliac_Stellate_VS_Sphenopalatine	1	1	1	1	1	1	1	0
GM47512	0.854	Lumbar_Coeliac_VS_P1_P2_P3_P4_Stellate_Sphenopalatine	0	0	0	0	1	1	0	0
PPP2R5A	0.854	P1_P2_P3_P4_Lumbar_Coeliac_Sphenopalatine_VS_Stellate	1	1	1	1	1	1	0	1
SH3D19	0.854	P1_P2_P3_P4_Lumbar_Coeliac_Sphenopalatine_VS_Stellate	1	1	1	1	1	1	0	1
EID2	0.854	P1_P2_P3_P4_Lumbar_Coeliac_Sphenopalatine_VS_Stellate	1	1	1	1	1	1	0	1
HDDC3	0.854	P1_P2_P3_P4_Lumbar_Coeliac_Sphenopalatine_VS_Stellate	1	1	1	1	1	1	0	1
GM43113	0.853	Lumbar_VS_P1_P2_P3_P4_Coeliac_Stellate_Sphenopalatine	0	0	0	0	1	0	0	0
FBXL7	0.853	P4_Lumbar_Coeliac_VS_P1_P2_P3_Stellate_Sphenopalatine	0	0	0	1	1	1	0	0
FBLL1	0.853	P1_P2_P3_P4_Lumbar_Coeliac_Sphenopalatine_VS_Stellate	1	1	1	1	1	1	0	1
EGR1	0.853	P1_P2_P3_P4_Lumbar_Coeliac_Sphenopalatine_VS_Stellate	1	1	1	1	1	1	0	1
TNNT2	0.852	P3_VS_P1_P2_P4_Lumbar_Coeliac_Stellate_Sphenopalatine	0	0	1	0	0	0	0	0
GM37494	0.852	Lumbar_Coeliac_VS_P1_P2_P3_P4_Stellate_Sphenopalatine	0	0	0	0	1	1	0	0
C1GALT1	0.852	P1_P2_P4_Lumbar_Coeliac_VS_P3_Stellate_Sphenopalatine	1	1	0	1	1	1	0	0
CHST15	0.852	P1_P2_P3_P4_Lumbar_Coeliac_VS_Stellate_Sphenopalatine	1	1	1	1	1	1	0	0
IGSF5	0.85	P1_VS_P2_P3_P4_Lumbar_Coeliac_Stellate_Sphenopalatine	1	0	0	0	0	0	0	0
ZFP53	0.849	Lumbar_Coeliac_VS_P1_P2_P3_P4_Stellate_Sphenopalatine	0	0	0	0	1	1	0	0
E130308A19RIK	0.849	P1_P2_P3_P4_Lumbar_Coeliac_Sphenopalatine_VS_Stellate	1	1	1	1	1	1	0	1
BGN	0.848	P4_VS_P1_P2_P3_Lumbar_Coeliac_Stellate_Sphenopalatine	0	0	0	1	0	0	0	0
L3MBTL3	0.848	Lumbar_VS_P1_P2_P3_P4_Coeliac_Stellate_Sphenopalatine	0	0	0	0	1	0	0	0
ADCY7	0.848	Sphenopalatine_VS_P1_P2_P3_P4_Lumbar_Coeliac_Stellate	0	0	0	0	0	0	0	1
ZFYVE16	0.848	P1_P2_P3_P4_Lumbar_Coeliac_Sphenopalatine_VS_Stellate	1	1	1	1	1	1	0	1
SDC4	0.847	P4_VS_P1_P2_P3_Lumbar_Coeliac_Stellate_Sphenopalatine	0	0	0	1	0	0	0	0
SASS6	0.847	Lumbar_Coeliac_VS_P1_P2_P3_P4_Stellate_Sphenopalatine	0	0	0	0	1	1	0	0
XIST	0.847	Stellate_VS_P1_P2_P3_P4_Lumbar_Coeliac_Sphenopalatine	0	0	0	0	0	0	1	0
LXN	0.847	P1_P3_P4_Lumbar_Coeliac_Stellate_Sphenopalatine_VS_P2	1	0	1	1	1	1	1	1
ZFP60	0.846	Lumbar_Coeliac_VS_P1_P2_P3_P4_Stellate_Sphenopalatine	0	0	0	0	1	1	0	0
MGAT4A	0.846	P1_P2_P3_P4_Lumbar_Coeliac_Sphenopalatine_VS_Stellate	1	1	1	1	1	1	0	1
SCRT1	0.846	P1_P2_P3_P4_Lumbar_Coeliac_Sphenopalatine_VS_Stellate	1	1	1	1	1	1	0	1
TOX2	0.846	P3_P4_Lumbar_Coeliac_Stellate_Sphenopalatine_VS_P1_P2	0	0	1	1	1	1	1	1
PREX1	0.845	Lumbar_Coeliac_VS_P1_P2_P3_P4_Stellate_Sphenopalatine	0	0	0	0	1	1	0	0
PRDM2	0.845	P1_P2_P3_P4_Lumbar_Coeliac_Sphenopalatine_VS_Stellate	1	1	1	1	1	1	0	1
ST5	0.844	P4_VS_P1_P2_P3_Lumbar_Coeliac_Stellate_Sphenopalatine	0	0	0	1	0	0	0	0
CCDC39	0.844	P4_Lumbar_Coeliac_VS_P1_P2_P3_Stellate_Sphenopalatine	0	0	0	1	1	1	0	0
TGFB3	0.844	P2_P3_P4_Lumbar_Coeliac_Stellate_VS_P1_Sphenopalatine	0	1	1	1	1	1	1	0
FASTKD1	0.844	P1_P2_P3_P4_Lumbar_Coeliac_Sphenopalatine_VS_Stellate	1	1	1	1	1	1	0	1
STXBP5L	0.843	Lumbar_Coeliac_VS_P1_P2_P3_P4_Stellate_Sphenopalatine	0	0	0	0	1	1	0	0
FRAS1	0.842	P4_VS_P1_P2_P3_Lumbar_Coeliac_Stellate_Sphenopalatine	0	0	0	1	0	0	0	0
BCAN	0.841	P4_VS_P1_P2_P3_Lumbar_Coeliac_Stellate_Sphenopalatine	0	0	0	1	0	0	0	0
AKAP7	0.841	P1_P2_P3_P4_Lumbar_Coeliac_Stellate_VS_Sphenopalatine	1	1	1	1	1	1	1	0
PPP4R4	0.84	Lumbar_Coeliac_VS_P1_P2_P3_P4_Stellate_Sphenopalatine	0	0	0	0	1	1	0	0
HLTF	0.84	P1_P2_P3_P4_Lumbar_Coeliac_Sphenopalatine_VS_Stellate	1	1	1	1	1	1	0	1
ATP11C	0.84	P1_P2_P3_P4_Lumbar_Coeliac_Sphenopalatine_VS_Stellate	1	1	1	1	1	1	0	1
SERPINA3N	0.839	P1_P2_P4_Sphenopalatine_VS_P3_Lumbar_Coeliac_Stellate	1	1	0	1	0	0	0	1
TENM4	0.838	P1_P2_P3_P4_Lumbar_Coeliac_VS_Stellate_Sphenopalatine	1	1	1	1	1	1	0	0
RNF168	0.836	P1_P2_P3_P4_Lumbar_Coeliac_Sphenopalatine_VS_Stellate	1	1	1	1	1	1	0	1
RUNX1	0.834	Sphenopalatine_VS_P1_P2_P3_P4_Lumbar_Coeliac_Stellate	0	0	0	0	0	0	0	1
BCLAF3	0.833	Lumbar_Coeliac_VS_P1_P2_P3_P4_Stellate_Sphenopalatine	0	0	0	0	1	1	0	0
CREBZF	0.833	P1_P2_P3_P4_Lumbar_Coeliac_Sphenopalatine_VS_Stellate	1	1	1	1	1	1	0	1
CNN2	0.832	P4_VS_P1_P2_P3_Lumbar_Coeliac_Stellate_Sphenopalatine	0	0	0	1	0	0	0	0
HS3ST5	0.832	P1_P2_P3_Lumbar_Coeliac_Stellate_Sphenopalatine_VS_P4	1	1	1	0	1	1	1	1
KLC3	0.831	Lumbar_VS_P1_P2_P3_P4_Coeliac_Stellate_Sphenopalatine	0	0	0	0	1	0	0	0
KCNJ11	0.831	Sphenopalatine_VS_P1_P2_P3_P4_Lumbar_Coeliac_Stellate	0	0	0	0	0	0	0	1
MPDZ	0.831	P1_P2_P3_P4_Lumbar_Coeliac_Sphenopalatine_VS_Stellate	1	1	1	1	1	1	0	1
TMEM119	0.83	P2_VS_P1_P3_P4_Lumbar_Coeliac_Stellate_Sphenopalatine	0	1	0	0	0	0	0	0
GCA	0.829	P4_VS_P1_P2_P3_Lumbar_Coeliac_Stellate_Sphenopalatine	0	0	0	1	0	0	0	0
TXNIP	0.829	P4_VS_P1_P2_P3_Lumbar_Coeliac_Stellate_Sphenopalatine	0	0	0	1	0	0	0	0
TMEM132A	0.829	P3_Lumbar_Coeliac_VS_P1_P2_P4_Stellate_Sphenopalatine	0	0	1	0	1	1	0	0
SLC25A28	0.829	P1_P2_P3_P4_Lumbar_Coeliac_Sphenopalatine_VS_Stellate	1	1	1	1	1	1	0	1
S100G	0.828	Lumbar_Stellate_VS_P1_P2_P3_P4_Coeliac_Sphenopalatine	0	0	0	0	1	0	1	0
CNOT6L	0.828	P1_P2_P3_P4_Lumbar_Coeliac_Sphenopalatine_VS_Stellate	1	1	1	1	1	1	0	1
SLC9A1	0.827	P1_P2_P3_P4_Lumbar_Coeliac_Sphenopalatine_VS_Stellate	1	1	1	1	1	1	0	1
FAM126A	0.827	P1_P2_P3_P4_Lumbar_Coeliac_Sphenopalatine_VS_Stellate	1	1	1	1	1	1	0	1
SOX10	0.826	P4_VS_P1_P2_P3_Lumbar_Coeliac_Stellate_Sphenopalatine	0	0	0	1	0	0	0	0
ZFX	0.826	P1_P2_P3_P4_Lumbar_Coeliac_Sphenopalatine_VS_Stellate	1	1	1	1	1	1	0	1
GM26759	0.822	P2_VS_P1_P3_P4_Lumbar_Coeliac_Stellate_Sphenopalatine	0	1	0	0	0	0	0	0
LRCH3	0.822	P1_P2_P3_P4_Lumbar_Coeliac_VS_Stellate_Sphenopalatine	1	1	1	1	1	1	0	0
SOGA1	0.822	P1_P2_P3_P4_Lumbar_Coeliac_Sphenopalatine_VS_Stellate	1	1	1	1	1	1	0	1
CDC25A	0.822	P1_P2_P3_P4_Lumbar_Coeliac_Sphenopalatine_VS_Stellate	1	1	1	1	1	1	0	1
BTAF1	0.822	P1_P2_P3_P4_Lumbar_Coeliac_Sphenopalatine_VS_Stellate	1	1	1	1	1	1	0	1
SLC7A7	0.822	P3_P4_Lumbar_Coeliac_Stellate_Sphenopalatine_VS_P1_P2	0	0	1	1	1	1	1	1
USP29	0.821	P1_P2_P3_P4_Lumbar_Coeliac_Sphenopalatine_VS_Stellate	1	1	1	1	1	1	0	1
2410018L13RIK	0.821	P1_P2_P3_P4_Lumbar_Coeliac_Sphenopalatine_VS_Stellate	1	1	1	1	1	1	0	1
PLEKHM2	0.819	P1_P2_P3_P4_Lumbar_Coeliac_Sphenopalatine_VS_Stellate	1	1	1	1	1	1	0	1
5330417C22RIK	0.818	P4_VS_P1_P2_P3_Lumbar_Coeliac_Stellate_Sphenopalatine	0	0	0	1	0	0	0	0
EVPL	0.818	Coeliac_VS_P1_P2_P3_P4_Lumbar_Stellate_Sphenopalatine	0	0	0	0	0	1	0	0
CSMD2	0.818	P1_P2_P3_P4_Lumbar_Coeliac_VS_Stellate_Sphenopalatine	1	1	1	1	1	1	0	0
TBC1D8	0.818	P1_P2_P3_P4_Lumbar_Coeliac_Sphenopalatine_VS_Stellate	1	1	1	1	1	1	0	1
MLLT3	0.817	P4_VS_P1_P2_P3_Lumbar_Coeliac_Stellate_Sphenopalatine	0	0	0	1	0	0	0	0
PRDM16	0.817	P4_VS_P1_P2_P3_Lumbar_Coeliac_Stellate_Sphenopalatine	0	0	0	1	0	0	0	0
HSPA12B	0.817	Lumbar_VS_P1_P2_P3_P4_Coeliac_Stellate_Sphenopalatine	0	0	0	0	1	0	0	0
CBLB	0.817	P1_P2_P3_P4_Lumbar_Coeliac_VS_Stellate_Sphenopalatine	1	1	1	1	1	1	0	0
BTBD7	0.817	P1_P2_P3_P4_Lumbar_Coeliac_Sphenopalatine_VS_Stellate	1	1	1	1	1	1	0	1
CDK13	0.817	P1_P2_P3_P4_Lumbar_Coeliac_Sphenopalatine_VS_Stellate	1	1	1	1	1	1	0	1
RPRM	0.817	P1_P4_Lumbar_Coeliac_Stellate_Sphenopalatine_VS_P2_P3	1	0	0	1	1	1	1	1
9530082P21RIK	0.816	P1_P4_Lumbar_Coeliac_VS_P2_P3_Stellate_Sphenopalatine	1	0	0	1	1	1	0	0
QPCT	0.816	P1_P2_P3_P4_Lumbar_Coeliac_Stellate_VS_Sphenopalatine	1	1	1	1	1	1	1	0
PIGZ	0.815	P4_Lumbar_Coeliac_VS_P1_P2_P3_Stellate_Sphenopalatine	0	0	0	1	1	1	0	0
FHL2	0.814	Lumbar_VS_P1_P2_P3_P4_Coeliac_Stellate_Sphenopalatine	0	0	0	0	1	0	0	0
GM49359	0.814	Lumbar_Coeliac_VS_P1_P2_P3_P4_Stellate_Sphenopalatine	0	0	0	0	1	1	0	0
FAM222A	0.814	P1_P2_P3_P4_Lumbar_Coeliac_Stellate_VS_Sphenopalatine	1	1	1	1	1	1	1	0
APOL7D	0.814	Sphenopalatine_VS_P1_P2_P3_P4_Lumbar_Coeliac_Stellate	0	0	0	0	0	0	0	1
SESTD1	0.814	P1_P2_P4_Lumbar_Coeliac_Sphenopalatine_VS_P3_Stellate	1	1	0	1	1	1	0	1
DACT2	0.813	P4_Lumbar_VS_P1_P2_P3_Coeliac_Stellate_Sphenopalatine	0	0	0	1	1	0	0	0
MYL6B	0.813	P1_P2_P3_Lumbar_Coeliac_VS_P4_Stellate_Sphenopalatine	1	1	1	0	1	1	0	0
1700095J03RIK	0.812	Lumbar_VS_P1_P2_P3_P4_Coeliac_Stellate_Sphenopalatine	0	0	0	0	1	0	0	0
ZSWIM6	0.812	P1_P2_P3_P4_Lumbar_Coeliac_Sphenopalatine_VS_Stellate	1	1	1	1	1	1	0	1
H2-M3	0.811	P4_VS_P1_P2_P3_Lumbar_Coeliac_Stellate_Sphenopalatine	0	0	0	1	0	0	0	0
ZFP74	0.811	P1_P2_P3_P4_Lumbar_Coeliac_Sphenopalatine_VS_Stellate	1	1	1	1	1	1	0	1
ZBTB44	0.811	P1_P2_P3_P4_Lumbar_Coeliac_Sphenopalatine_VS_Stellate	1	1	1	1	1	1	0	1
TMEM51	0.811	P1_P2_P3_Lumbar_Coeliac_Stellate_Sphenopalatine_VS_P4	1	1	1	0	1	1	1	1
FIBCD1	0.81	P2_P4_VS_P1_P3_Lumbar_Coeliac_Stellate_Sphenopalatine	0	1	0	1	0	0	0	0
ATM	0.81	Lumbar_Coeliac_VS_P1_P2_P3_P4_Stellate_Sphenopalatine	0	0	0	0	1	1	0	0
CNOT3	0.81	P1_P2_P3_P4_Lumbar_Coeliac_Sphenopalatine_VS_Stellate	1	1	1	1	1	1	0	1
PRSS35	0.809	P3_VS_P1_P2_P4_Lumbar_Coeliac_Stellate_Sphenopalatine	0	0	1	0	0	0	0	0
ATF3	0.809	P4_VS_P1_P2_P3_Lumbar_Coeliac_Stellate_Sphenopalatine	0	0	0	1	0	0	0	0
D430041D05RIK	0.809	Lumbar_VS_P1_P2_P3_P4_Coeliac_Stellate_Sphenopalatine	0	0	0	0	1	0	0	0
MOCS3	0.809	P1_P2_P3_P4_Lumbar_Coeliac_Sphenopalatine_VS_Stellate	1	1	1	1	1	1	0	1
CLIC4	0.809	P1_P2_P3_P4_Lumbar_Coeliac_Sphenopalatine_VS_Stellate	1	1	1	1	1	1	0	1
NR1D2	0.809	P1_P2_P3_P4_Lumbar_Coeliac_Sphenopalatine_VS_Stellate	1	1	1	1	1	1	0	1
TBX3	0.808	P1_P2_P3_Coeliac_Sphenopalatine_VS_P4_Lumbar_Stellate	1	1	1	0	0	1	0	1
SMARCAL1	0.807	Lumbar_Coeliac_VS_P1_P2_P3_P4_Stellate_Sphenopalatine	0	0	0	0	1	1	0	0
RNF144A	0.807	P1_P2_P3_P4_Lumbar_Coeliac_Stellate_VS_Sphenopalatine	1	1	1	1	1	1	1	0
SAMD1	0.807	P1_P2_P3_P4_Lumbar_Coeliac_Sphenopalatine_VS_Stellate	1	1	1	1	1	1	0	1
SPACA6	0.807	P1_P2_P3_P4_Lumbar_Coeliac_Sphenopalatine_VS_Stellate	1	1	1	1	1	1	0	1
LTBP3	0.807	P1_P2_P3_P4_Lumbar_Coeliac_Sphenopalatine_VS_Stellate	1	1	1	1	1	1	0	1
PLOD1	0.804	P4_VS_P1_P2_P3_Lumbar_Coeliac_Stellate_Sphenopalatine	0	0	0	1	0	0	0	0
NRIP1	0.804	P1_P2_P3_P4_Lumbar_Coeliac_Sphenopalatine_VS_Stellate	1	1	1	1	1	1	0	1
FANCF	0.803	Lumbar_VS_P1_P2_P3_P4_Coeliac_Stellate_Sphenopalatine	0	0	0	0	1	0	0	0
ST8SIA2	0.803	Lumbar_Coeliac_VS_P1_P2_P3_P4_Stellate_Sphenopalatine	0	0	0	0	1	1	0	0
FBLN1	0.803	P1_P2_Lumbar_Coeliac_VS_P3_P4_Stellate_Sphenopalatine	1	1	0	0	1	1	0	0
CUL4B	0.803	P1_P2_P3_P4_Lumbar_Coeliac_Sphenopalatine_VS_Stellate	1	1	1	1	1	1	0	1
DPYD	0.802	P1_P2_P3_P4_Lumbar_Coeliac_Sphenopalatine_VS_Stellate	1	1	1	1	1	1	0	1
IQSEC2	0.802	P1_P2_P3_P4_Lumbar_Coeliac_Sphenopalatine_VS_Stellate	1	1	1	1	1	1	0	1
LRBA	0.801	P1_P2_P3_P4_Lumbar_Coeliac_Sphenopalatine_VS_Stellate	1	1	1	1	1	1	0	1
DISP3	0.8	P3_VS_P1_P2_P4_Lumbar_Coeliac_Stellate_Sphenopalatine	0	0	1	0	0	0	0	0
PLEKHA7	0.8	Lumbar_VS_P1_P2_P3_P4_Coeliac_Stellate_Sphenopalatine	0	0	0	0	1	0	0	0
RIMS1	0.8	P3_P4_Lumbar_Coeliac_VS_P1_P2_Stellate_Sphenopalatine	0	0	1	1	1	1	0	0
TOB2	0.8	P1_P2_P3_P4_Lumbar_Coeliac_Sphenopalatine_VS_Stellate	1	1	1	1	1	1	0	1
SLK	0.8	P1_P2_P3_P4_Lumbar_Coeliac_Sphenopalatine_VS_Stellate	1	1	1	1	1	1	0	1
DCN	0.798	P1_P2_P3_P4_Coeliac_Sphenopalatine_VS_Lumbar_Stellate	1	1	1	1	0	1	0	1
CSRNP1	0.797	P1_P2_P4_Sphenopalatine_VS_P3_Lumbar_Coeliac_Stellate	1	1	0	1	0	0	0	1
ERBIN	0.797	P1_P2_P3_P4_Lumbar_Coeliac_Sphenopalatine_VS_Stellate	1	1	1	1	1	1	0	1
ETL4	0.796	P1_Lumbar_VS_P2_P3_P4_Coeliac_Stellate_Sphenopalatine	1	0	0	0	1	0	0	0
CEMIP2	0.796	P4_Lumbar_Coeliac_VS_P1_P2_P3_Stellate_Sphenopalatine	0	0	0	1	1	1	0	0
SLIT3	0.796	P1_P2_P3_P4_Lumbar_Coeliac_Sphenopalatine_VS_Stellate	1	1	1	1	1	1	0	1
PDCD11	0.796	P1_P2_P3_P4_Lumbar_Coeliac_Sphenopalatine_VS_Stellate	1	1	1	1	1	1	0	1
GLP1R	0.795	P3_VS_P1_P2_P4_Lumbar_Coeliac_Stellate_Sphenopalatine	0	0	1	0	0	0	0	0
NOS3	0.795	P4_VS_P1_P2_P3_Lumbar_Coeliac_Stellate_Sphenopalatine	0	0	0	1	0	0	0	0
S1PR3	0.795	P4_VS_P1_P2_P3_Lumbar_Coeliac_Stellate_Sphenopalatine	0	0	0	1	0	0	0	0
INO80	0.795	P1_P2_P3_P4_Lumbar_Coeliac_Sphenopalatine_VS_Stellate	1	1	1	1	1	1	0	1
NBL1	0.795	P1_P2_P3_Lumbar_Coeliac_Stellate_Sphenopalatine_VS_P4	1	1	1	0	1	1	1	1
TRPM3	0.794	P4_Lumbar_VS_P1_P2_P3_Coeliac_Stellate_Sphenopalatine	0	0	0	1	1	0	0	0
ZFP618	0.793	P1_P2_P3_P4_Lumbar_Coeliac_Sphenopalatine_VS_Stellate	1	1	1	1	1	1	0	1
ETS2	0.793	P1_P2_P3_P4_Lumbar_Coeliac_Sphenopalatine_VS_Stellate	1	1	1	1	1	1	0	1
PCYT1B	0.793	P1_P2_P3_P4_Lumbar_Coeliac_Sphenopalatine_VS_Stellate	1	1	1	1	1	1	0	1
DUSP6	0.792	P3_VS_P1_P2_P4_Lumbar_Coeliac_Stellate_Sphenopalatine	0	0	1	0	0	0	0	0
EBF1	0.792	P1_P2_P3_P4_Lumbar_Coeliac_Stellate_VS_Sphenopalatine	1	1	1	1	1	1	1	0
DOCK4	0.792	P1_P2_P3_P4_Lumbar_Coeliac_Stellate_VS_Sphenopalatine	1	1	1	1	1	1	1	0
USP6NL	0.792	P1_P2_P3_P4_Lumbar_Coeliac_Sphenopalatine_VS_Stellate	1	1	1	1	1	1	0	1
MYCL	0.792	P1_P2_P3_Lumbar_Coeliac_Stellate_Sphenopalatine_VS_P4	1	1	1	0	1	1	1	1
RBFOX1	0.792	P1_P2_P3_Lumbar_Coeliac_Stellate_Sphenopalatine_VS_P4	1	1	1	0	1	1	1	1
GPX8	0.791	P4_VS_P1_P2_P3_Lumbar_Coeliac_Stellate_Sphenopalatine	0	0	0	1	0	0	0	0
PACRG	0.791	P3_P4_Coeliac_VS_P1_P2_Lumbar_Stellate_Sphenopalatine	0	0	1	1	0	1	0	0
ZFP1	0.791	Lumbar_Coeliac_VS_P1_P2_P3_P4_Stellate_Sphenopalatine	0	0	0	0	1	1	0	0
TCAIM	0.791	P1_P2_P3_P4_Lumbar_Coeliac_Sphenopalatine_VS_Stellate	1	1	1	1	1	1	0	1
HIST1H4H	0.79	Coeliac_VS_P1_P2_P3_P4_Lumbar_Stellate_Sphenopalatine	0	0	0	0	0	1	0	0
HMCN2	0.789	P1_Sphenopalatine_VS_P2_P3_P4_Lumbar_Coeliac_Stellate	1	0	0	0	0	0	0	1
ANKRD26	0.789	P1_P2_P3_P4_Lumbar_Coeliac_Sphenopalatine_VS_Stellate	1	1	1	1	1	1	0	1
LDOC1	0.788	P3_VS_P1_P2_P4_Lumbar_Coeliac_Stellate_Sphenopalatine	0	0	1	0	0	0	0	0
GM45159	0.788	P4_Lumbar_Coeliac_VS_P1_P2_P3_Stellate_Sphenopalatine	0	0	0	1	1	1	0	0
COX6A2	0.788	Sphenopalatine_VS_P1_P2_P3_P4_Lumbar_Coeliac_Stellate	0	0	0	0	0	0	0	1
LYSMD3	0.787	Lumbar_Coeliac_VS_P1_P2_P3_P4_Stellate_Sphenopalatine	0	0	0	0	1	1	0	0
NCAPD3	0.787	P1_P2_P3_P4_Lumbar_Coeliac_Sphenopalatine_VS_Stellate	1	1	1	1	1	1	0	1
TMTC2	0.786	P4_VS_P1_P2_P3_Lumbar_Coeliac_Stellate_Sphenopalatine	0	0	0	1	0	0	0	0
SCRT2	0.786	Lumbar_VS_P1_P2_P3_P4_Coeliac_Stellate_Sphenopalatine	0	0	0	0	1	0	0	0
CLU	0.786	P1_P2_P3_P4_Coeliac_Sphenopalatine_VS_Lumbar_Stellate	1	1	1	1	0	1	0	1
SAMHD1	0.786	P1_P2_P3_P4_Lumbar_Coeliac_Sphenopalatine_VS_Stellate	1	1	1	1	1	1	0	1
GPN3	0.785	Lumbar_Coeliac_VS_P1_P2_P3_P4_Stellate_Sphenopalatine	0	0	0	0	1	1	0	0
IL17D	0.785	Lumbar_Coeliac_VS_P1_P2_P3_P4_Stellate_Sphenopalatine	0	0	0	0	1	1	0	0
FLRT3	0.785	P1_P2_P4_Lumbar_Coeliac_VS_P3_Stellate_Sphenopalatine	1	1	0	1	1	1	0	0
ACOT1	0.784	P4_VS_P1_P2_P3_Lumbar_Coeliac_Stellate_Sphenopalatine	0	0	0	1	0	0	0	0
GM2694	0.784	P1_P2_P4_Lumbar_VS_P3_Coeliac_Stellate_Sphenopalatine	1	1	0	1	1	0	0	0
NRG3	0.784	P1_P4_Lumbar_Coeliac_VS_P2_P3_Stellate_Sphenopalatine	1	0	0	1	1	1	0	0
ASCC3	0.783	P1_P2_P3_P4_Lumbar_Coeliac_Sphenopalatine_VS_Stellate	1	1	1	1	1	1	0	1
HACL1	0.782	P4_VS_P1_P2_P3_Lumbar_Coeliac_Stellate_Sphenopalatine	0	0	0	1	0	0	0	0
TMEM268	0.782	P2_P4_VS_P1_P3_Lumbar_Coeliac_Stellate_Sphenopalatine	0	1	0	1	0	0	0	0
TUBB6	0.782	P1_P2_P3_P4_Sphenopalatine_VS_Lumbar_Coeliac_Stellate	1	1	1	1	0	0	0	1
ADAM9	0.782	P1_P2_P3_P4_Lumbar_Coeliac_Sphenopalatine_VS_Stellate	1	1	1	1	1	1	0	1
PLPPR1	0.782	P1_P2_P3_Lumbar_Coeliac_Stellate_Sphenopalatine_VS_P4	1	1	1	0	1	1	1	1
MEX3B	0.781	Lumbar_Coeliac_VS_P1_P2_P3_P4_Stellate_Sphenopalatine	0	0	0	0	1	1	0	0
TRIM62	0.781	P1_P2_P3_P4_Lumbar_Coeliac_Sphenopalatine_VS_Stellate	1	1	1	1	1	1	0	1
GIGYF1	0.781	P1_P2_P3_P4_Lumbar_Coeliac_Sphenopalatine_VS_Stellate	1	1	1	1	1	1	0	1
GAREM1	0.78	P1_VS_P2_P3_P4_Lumbar_Coeliac_Stellate_Sphenopalatine	1	0	0	0	0	0	0	0
RDH10	0.78	P4_VS_P1_P2_P3_Lumbar_Coeliac_Stellate_Sphenopalatine	0	0	0	1	0	0	0	0
4930509H03RIK	0.78	Lumbar_Coeliac_VS_P1_P2_P3_P4_Stellate_Sphenopalatine	0	0	0	0	1	1	0	0
PSG16	0.78	Lumbar_Coeliac_VS_P1_P2_P3_P4_Stellate_Sphenopalatine	0	0	0	0	1	1	0	0
NFKB2	0.78	Lumbar_Coeliac_VS_P1_P2_P3_P4_Stellate_Sphenopalatine	0	0	0	0	1	1	0	0
FAM126B	0.78	P1_P2_P3_P4_Lumbar_Coeliac_Sphenopalatine_VS_Stellate	1	1	1	1	1	1	0	1
SLC12A2	0.779	P1_P2_P3_P4_Lumbar_Coeliac_Sphenopalatine_VS_Stellate	1	1	1	1	1	1	0	1
INSYN1	0.779	P1_P3_P4_Lumbar_Coeliac_Stellate_Sphenopalatine_VS_P2	1	0	1	1	1	1	1	1
GM45847	0.778	P4_VS_P1_P2_P3_Lumbar_Coeliac_Stellate_Sphenopalatine	0	0	0	1	0	0	0	0
2900026A02RIK	0.778	Lumbar_Coeliac_VS_P1_P2_P3_P4_Stellate_Sphenopalatine	0	0	0	0	1	1	0	0
SRGAP2	0.778	P1_P2_P3_P4_Lumbar_Coeliac_Sphenopalatine_VS_Stellate	1	1	1	1	1	1	0	1
TTC12	0.777	Lumbar_Coeliac_VS_P1_P2_P3_P4_Stellate_Sphenopalatine	0	0	0	0	1	1	0	0
AKAP5	0.777	P1_P3_Lumbar_Coeliac_Sphenopalatine_VS_P2_P4_Stellate	1	0	1	0	1	1	0	1
CDR1OS	0.777	P1_P2_P3_P4_Lumbar_Coeliac_Sphenopalatine_VS_Stellate	1	1	1	1	1	1	0	1
NFIX	0.776	P4_VS_P1_P2_P3_Lumbar_Coeliac_Stellate_Sphenopalatine	0	0	0	1	0	0	0	0
CACNA1E	0.776	P2_P4_VS_P1_P3_Lumbar_Coeliac_Stellate_Sphenopalatine	0	1	0	1	0	0	0	0
RASAL2	0.776	P1_P2_P3_P4_Lumbar_Coeliac_Sphenopalatine_VS_Stellate	1	1	1	1	1	1	0	1
RWDD2A	0.776	P1_P2_P3_P4_Lumbar_Coeliac_Sphenopalatine_VS_Stellate	1	1	1	1	1	1	0	1
NUFIP2	0.776	P1_P2_P3_P4_Lumbar_Coeliac_Sphenopalatine_VS_Stellate	1	1	1	1	1	1	0	1
MDGA2	0.776	P1_P2_P3_P4_Lumbar_Coeliac_Sphenopalatine_VS_Stellate	1	1	1	1	1	1	0	1
HOXA4	0.775	P4_VS_P1_P2_P3_Lumbar_Coeliac_Stellate_Sphenopalatine	0	0	0	1	0	0	0	0
2005-09-01	0.775	Lumbar_Coeliac_VS_P1_P2_P3_P4_Stellate_Sphenopalatine	0	0	0	0	1	1	0	0
HIP1	0.775	P1_P2_P3_P4_Lumbar_Coeliac_Stellate_VS_Sphenopalatine	1	1	1	1	1	1	1	0
EPHX4	0.774	P3_Lumbar_Coeliac_Stellate_VS_P1_P2_P4_Sphenopalatine	0	0	1	0	1	1	1	0
DNAJB12	0.774	P1_P2_P3_P4_Lumbar_Coeliac_Sphenopalatine_VS_Stellate	1	1	1	1	1	1	0	1
ETV1	0.773	P1_P3_VS_P2_P4_Lumbar_Coeliac_Stellate_Sphenopalatine	1	0	1	0	0	0	0	0
GM9895	0.773	Lumbar_Coeliac_VS_P1_P2_P3_P4_Stellate_Sphenopalatine	0	0	0	0	1	1	0	0
TEX10	0.773	P1_P2_P3_P4_Lumbar_Coeliac_Sphenopalatine_VS_Stellate	1	1	1	1	1	1	0	1
MAN2A2	0.773	P1_P2_P3_P4_Lumbar_Coeliac_Sphenopalatine_VS_Stellate	1	1	1	1	1	1	0	1
RNF180	0.772	P3_VS_P1_P2_P4_Lumbar_Coeliac_Stellate_Sphenopalatine	0	0	1	0	0	0	0	0
GPR137C	0.772	P1_P2_P3_P4_Lumbar_Coeliac_Sphenopalatine_VS_Stellate	1	1	1	1	1	1	0	1
LCA5	0.771	Lumbar_Coeliac_VS_P1_P2_P3_P4_Stellate_Sphenopalatine	0	0	0	0	1	1	0	0
FILIP1	0.771	P1_P2_Lumbar_Coeliac_Sphenopalatine_VS_P3_P4_Stellate	1	1	0	0	1	1	0	1
GM4673	0.77	Lumbar_Coeliac_VS_P1_P2_P3_P4_Stellate_Sphenopalatine	0	0	0	0	1	1	0	0
SLC2A12	0.77	P4_Lumbar_Coeliac_VS_P1_P2_P3_Stellate_Sphenopalatine	0	0	0	1	1	1	0	0
PDIA5	0.769	Lumbar_VS_P1_P2_P3_P4_Coeliac_Stellate_Sphenopalatine	0	0	0	0	1	0	0	0
CEP162	0.769	Lumbar_Coeliac_VS_P1_P2_P3_P4_Stellate_Sphenopalatine	0	0	0	0	1	1	0	0
CCDC160	0.768	Coeliac_VS_P1_P2_P3_P4_Lumbar_Stellate_Sphenopalatine	0	0	0	0	0	1	0	0
GM9962	0.768	Sphenopalatine_VS_P1_P2_P3_P4_Lumbar_Coeliac_Stellate	0	0	0	0	0	0	0	1
RASL11B	0.767	P4_VS_P1_P2_P3_Lumbar_Coeliac_Stellate_Sphenopalatine	0	0	0	1	0	0	0	0
HSD17B4	0.767	P4_Lumbar_Coeliac_VS_P1_P2_P3_Stellate_Sphenopalatine	0	0	0	1	1	1	0	0
GM42937	0.767	P1_P2_P3_P4_Lumbar_Coeliac_VS_Stellate_Sphenopalatine	1	1	1	1	1	1	0	0
ZBTB11	0.767	P1_P2_P3_P4_Lumbar_Coeliac_Sphenopalatine_VS_Stellate	1	1	1	1	1	1	0	1
KIFC3	0.766	P4_VS_P1_P2_P3_Lumbar_Coeliac_Stellate_Sphenopalatine	0	0	0	1	0	0	0	0
SPTY2D1	0.766	P1_P2_P3_P4_Lumbar_Coeliac_Sphenopalatine_VS_Stellate	1	1	1	1	1	1	0	1
AMPD2	0.765	P1_P2_P3_P4_Lumbar_Coeliac_Sphenopalatine_VS_Stellate	1	1	1	1	1	1	0	1
GPBP1L1	0.765	P1_P2_P3_P4_Lumbar_Coeliac_Sphenopalatine_VS_Stellate	1	1	1	1	1	1	0	1
BRD1	0.765	P1_P2_P3_P4_Lumbar_Coeliac_Sphenopalatine_VS_Stellate	1	1	1	1	1	1	0	1
RNF219	0.764	Lumbar_Coeliac_VS_P1_P2_P3_P4_Stellate_Sphenopalatine	0	0	0	0	1	1	0	0
FER	0.764	Lumbar_Coeliac_VS_P1_P2_P3_P4_Stellate_Sphenopalatine	0	0	0	0	1	1	0	0
PCDH7	0.764	P1_P2_P4_Lumbar_Coeliac_Stellate_VS_P3_Sphenopalatine	1	1	0	1	1	1	1	0
PMEPA1	0.763	P1_P2_P4_Lumbar_Coeliac_Sphenopalatine_VS_P3_Stellate	1	1	0	1	1	1	0	1
DUSP5	0.762	P2_VS_P1_P3_P4_Lumbar_Coeliac_Stellate_Sphenopalatine	0	1	0	0	0	0	0	0
NEBL	0.762	Lumbar_VS_P1_P2_P3_P4_Coeliac_Stellate_Sphenopalatine	0	0	0	0	1	0	0	0
TNNC1	0.762	Lumbar_VS_P1_P2_P3_P4_Coeliac_Stellate_Sphenopalatine	0	0	0	0	1	0	0	0
RIF1	0.762	Lumbar_Coeliac_VS_P1_P2_P3_P4_Stellate_Sphenopalatine	0	0	0	0	1	1	0	0
ATAD2B	0.762	Lumbar_Coeliac_VS_P1_P2_P3_P4_Stellate_Sphenopalatine	0	0	0	0	1	1	0	0
N4BP1	0.762	P1_P2_P3_P4_Lumbar_Coeliac_Sphenopalatine_VS_Stellate	1	1	1	1	1	1	0	1
ZFP608	0.761	P1_P2_P3_P4_Lumbar_Coeliac_Sphenopalatine_VS_Stellate	1	1	1	1	1	1	0	1
ZFP57	0.76	Lumbar_Coeliac_VS_P1_P2_P3_P4_Stellate_Sphenopalatine	0	0	0	0	1	1	0	0
COL1A2	0.76	P1_P2_P3_P4_Coeliac_Sphenopalatine_VS_Lumbar_Stellate	1	1	1	1	0	1	0	1
CDK8	0.76	P1_P2_P3_P4_Lumbar_Coeliac_Sphenopalatine_VS_Stellate	1	1	1	1	1	1	0	1
ZFP646	0.76	P1_P2_P3_P4_Lumbar_Coeliac_Sphenopalatine_VS_Stellate	1	1	1	1	1	1	0	1
NMRAL1	0.759	Lumbar_Coeliac_VS_P1_P2_P3_P4_Stellate_Sphenopalatine	0	0	0	0	1	1	0	0
TACC2	0.759	P1_P2_P3_P4_Lumbar_Coeliac_Stellate_VS_Sphenopalatine	1	1	1	1	1	1	1	0
IFIT2	0.759	P1_P2_P3_P4_Lumbar_Coeliac_Sphenopalatine_VS_Stellate	1	1	1	1	1	1	0	1
FAM98B	0.758	Lumbar_Coeliac_VS_P1_P2_P3_P4_Stellate_Sphenopalatine	0	0	0	0	1	1	0	0
YES1	0.758	Lumbar_Coeliac_VS_P1_P2_P3_P4_Stellate_Sphenopalatine	0	0	0	0	1	1	0	0
ARL14EP	0.758	P1_P2_P3_P4_Lumbar_Coeliac_Sphenopalatine_VS_Stellate	1	1	1	1	1	1	0	1
PHACTR4	0.757	P1_P2_P3_P4_Lumbar_Coeliac_Sphenopalatine_VS_Stellate	1	1	1	1	1	1	0	1
BICDL1	0.757	P1_P2_P3_P4_Lumbar_Coeliac_Sphenopalatine_VS_Stellate	1	1	1	1	1	1	0	1
TECPR2	0.757	P1_P2_P3_P4_Lumbar_Coeliac_Sphenopalatine_VS_Stellate	1	1	1	1	1	1	0	1
RASIP1	0.756	Lumbar_VS_P1_P2_P3_P4_Coeliac_Stellate_Sphenopalatine	0	0	0	0	1	0	0	0
ZFP592	0.756	P1_P2_P3_P4_Lumbar_Coeliac_Sphenopalatine_VS_Stellate	1	1	1	1	1	1	0	1
TAFA5	0.756	P1_P2_P3_P4_Lumbar_Coeliac_Sphenopalatine_VS_Stellate	1	1	1	1	1	1	0	1
SP1	0.756	P1_P2_P3_P4_Lumbar_Coeliac_Sphenopalatine_VS_Stellate	1	1	1	1	1	1	0	1
ELP4	0.755	Lumbar_Coeliac_VS_P1_P2_P3_P4_Stellate_Sphenopalatine	0	0	0	0	1	1	0	0
GALNT7	0.755	P1_P2_P3_P4_Lumbar_Coeliac_Sphenopalatine_VS_Stellate	1	1	1	1	1	1	0	1
FAM76B	0.754	Lumbar_Coeliac_VS_P1_P2_P3_P4_Stellate_Sphenopalatine	0	0	0	0	1	1	0	0
SGK1	0.753	Lumbar_VS_P1_P2_P3_P4_Coeliac_Stellate_Sphenopalatine	0	0	0	0	1	0	0	0
ZBTB43	0.753	Lumbar_Coeliac_VS_P1_P2_P3_P4_Stellate_Sphenopalatine	0	0	0	0	1	1	0	0
WDR44	0.753	P1_P2_P3_P4_Lumbar_Coeliac_Sphenopalatine_VS_Stellate	1	1	1	1	1	1	0	1
AFF2	0.752	P2_VS_P1_P3_P4_Lumbar_Coeliac_Stellate_Sphenopalatine	0	1	0	0	0	0	0	0
4732440D04RIK	0.752	Lumbar_Coeliac_VS_P1_P2_P3_P4_Stellate_Sphenopalatine	0	0	0	0	1	1	0	0
TEX29	0.751	P3_P4_VS_P1_P2_Lumbar_Coeliac_Stellate_Sphenopalatine	0	0	1	1	0	0	0	0
NAB1	0.751	P1_P2_P3_P4_Lumbar_Coeliac_Sphenopalatine_VS_Stellate	1	1	1	1	1	1	0	1
ZFYVE9	0.751	P1_P2_P3_P4_Lumbar_Coeliac_Sphenopalatine_VS_Stellate	1	1	1	1	1	1	0	1
CYFIP1	0.751	P1_P2_P3_P4_Lumbar_Coeliac_Sphenopalatine_VS_Stellate	1	1	1	1	1	1	0	1
TNNT1	0.751	P1_P2_P3_Lumbar_Coeliac_Stellate_Sphenopalatine_VS_P4	1	1	1	0	1	1	1	1
SPATA5	0.75	Lumbar_Coeliac_VS_P1_P2_P3_P4_Stellate_Sphenopalatine	0	0	0	0	1	1	0	0
SBNO2	0.75	P1_Sphenopalatine_VS_P2_P3_P4_Lumbar_Coeliac_Stellate	1	0	0	0	0	0	0	1
SPIRE2	0.75	P1_P2_P3_P4_Lumbar_Coeliac_Sphenopalatine_VS_Stellate	1	1	1	1	1	1	0	1
EZH1	0.75	P1_P2_P3_P4_Lumbar_Coeliac_Sphenopalatine_VS_Stellate	1	1	1	1	1	1	0	1
DSG2	0.749	Lumbar_VS_P1_P2_P3_P4_Coeliac_Stellate_Sphenopalatine	0	0	0	0	1	0	0	0
TNS1	0.749	P1_P2_P3_P4_Lumbar_Coeliac_Sphenopalatine_VS_Stellate	1	1	1	1	1	1	0	1
AGO3	0.749	P1_P2_P3_P4_Lumbar_Coeliac_Sphenopalatine_VS_Stellate	1	1	1	1	1	1	0	1
PGM3	0.748	Lumbar_Coeliac_VS_P1_P2_P3_P4_Stellate_Sphenopalatine	0	0	0	0	1	1	0	0
EDRF1	0.748	P4_Lumbar_Coeliac_VS_P1_P2_P3_Stellate_Sphenopalatine	0	0	0	1	1	1	0	0
GM17066	0.748	P1_P2_P3_P4_Lumbar_Coeliac_Sphenopalatine_VS_Stellate	1	1	1	1	1	1	0	1
SCRN2	0.747	Lumbar_VS_P1_P2_P3_P4_Coeliac_Stellate_Sphenopalatine	0	0	0	0	1	0	0	0
BACH1	0.747	Lumbar_Coeliac_VS_P1_P2_P3_P4_Stellate_Sphenopalatine	0	0	0	0	1	1	0	0
LGI2	0.747	P1_P2_P3_P4_Lumbar_Coeliac_Sphenopalatine_VS_Stellate	1	1	1	1	1	1	0	1
MED13	0.746	P1_P2_P3_P4_Lumbar_Coeliac_Sphenopalatine_VS_Stellate	1	1	1	1	1	1	0	1
DOT1L	0.745	P1_P2_P3_P4_Lumbar_Coeliac_Sphenopalatine_VS_Stellate	1	1	1	1	1	1	0	1
RAB12	0.745	P1_P2_P3_P4_Lumbar_Coeliac_Sphenopalatine_VS_Stellate	1	1	1	1	1	1	0	1
PHKA2	0.745	P1_P2_P3_P4_Lumbar_Coeliac_Sphenopalatine_VS_Stellate	1	1	1	1	1	1	0	1
GM35147	0.744	P2_VS_P1_P3_P4_Lumbar_Coeliac_Stellate_Sphenopalatine	0	1	0	0	0	0	0	0
ETV6	0.744	P1_P2_P3_P4_Lumbar_Coeliac_VS_Stellate_Sphenopalatine	1	1	1	1	1	1	0	0
ELOA	0.744	P1_P2_P3_P4_Lumbar_Coeliac_Sphenopalatine_VS_Stellate	1	1	1	1	1	1	0	1
MNT	0.744	P1_P2_P3_P4_Lumbar_Coeliac_Sphenopalatine_VS_Stellate	1	1	1	1	1	1	0	1
NEAT1	0.744	P1_P2_P3_P4_Lumbar_Coeliac_Sphenopalatine_VS_Stellate	1	1	1	1	1	1	0	1
STK26	0.743	Coeliac_VS_P1_P2_P3_P4_Lumbar_Stellate_Sphenopalatine	0	0	0	0	0	1	0	0
KCNT1	0.743	P3_P4_Lumbar_Coeliac_Stellate_VS_P1_P2_Sphenopalatine	0	0	1	1	1	1	1	0
ZFP62	0.743	P1_P2_P3_P4_Lumbar_Coeliac_Sphenopalatine_VS_Stellate	1	1	1	1	1	1	0	1
DBF4	0.742	Lumbar_Coeliac_VS_P1_P2_P3_P4_Stellate_Sphenopalatine	0	0	0	0	1	1	0	0
ZFP830	0.742	Lumbar_Coeliac_VS_P1_P2_P3_P4_Stellate_Sphenopalatine	0	0	0	0	1	1	0	0
MMP16	0.742	P1_P2_P3_P4_Lumbar_Coeliac_Sphenopalatine_VS_Stellate	1	1	1	1	1	1	0	1
PRR14L	0.742	P1_P2_P3_P4_Lumbar_Coeliac_Sphenopalatine_VS_Stellate	1	1	1	1	1	1	0	1
SCPEP1	0.742	P1_P2_P3_P4_Lumbar_Coeliac_Sphenopalatine_VS_Stellate	1	1	1	1	1	1	0	1
GM4258	0.741	P3_Lumbar_Coeliac_VS_P1_P2_P4_Stellate_Sphenopalatine	0	0	1	0	1	1	0	0
GRIP1	0.741	P1_P2_P4_Lumbar_Coeliac_Sphenopalatine_VS_P3_Stellate	1	1	0	1	1	1	0	1
THEM6	0.741	P1_P2_P3_P4_Lumbar_Coeliac_Sphenopalatine_VS_Stellate	1	1	1	1	1	1	0	1
RGS20	0.74	Lumbar_VS_P1_P2_P3_P4_Coeliac_Stellate_Sphenopalatine	0	0	0	0	1	0	0	0
GJC1	0.74	Lumbar_Coeliac_VS_P1_P2_P3_P4_Stellate_Sphenopalatine	0	0	0	0	1	1	0	0
PHLPP2	0.74	P1_P2_P3_P4_Lumbar_Coeliac_Sphenopalatine_VS_Stellate	1	1	1	1	1	1	0	1
PAXBP1	0.739	Lumbar_Coeliac_VS_P1_P2_P3_P4_Stellate_Sphenopalatine	0	0	0	0	1	1	0	0
GM10419	0.739	P1_P2_P4_Sphenopalatine_VS_P3_Lumbar_Coeliac_Stellate	1	1	0	1	0	0	0	1
NEGR1	0.739	P1_P2_P3_P4_Lumbar_Coeliac_Sphenopalatine_VS_Stellate	1	1	1	1	1	1	0	1
ARRB1	0.739	P1_P2_P3_P4_Lumbar_Coeliac_Sphenopalatine_VS_Stellate	1	1	1	1	1	1	0	1
POLK	0.739	P1_P2_P3_P4_Lumbar_Coeliac_Sphenopalatine_VS_Stellate	1	1	1	1	1	1	0	1
RNF138RT1	0.738	P3_Lumbar_Coeliac_VS_P1_P2_P4_Stellate_Sphenopalatine	0	0	1	0	1	1	0	0
AKAIN1	0.738	P4_Lumbar_Coeliac_Stellate_VS_P1_P2_P3_Sphenopalatine	0	0	0	1	1	1	1	0
PCDH19	0.738	P1_P4_Lumbar_Coeliac_Sphenopalatine_VS_P2_P3_Stellate	1	0	0	1	1	1	0	1
ZFP423	0.738	P1_P2_P3_P4_Lumbar_Coeliac_Sphenopalatine_VS_Stellate	1	1	1	1	1	1	0	1
ETAA1	0.738	P1_P2_P3_P4_Lumbar_Coeliac_Sphenopalatine_VS_Stellate	1	1	1	1	1	1	0	1
SDC1	0.737	P1_VS_P2_P3_P4_Lumbar_Coeliac_Stellate_Sphenopalatine	1	0	0	0	0	0	0	0
GM19345	0.737	Sphenopalatine_VS_P1_P2_P3_P4_Lumbar_Coeliac_Stellate	0	0	0	0	0	0	0	1
HIVEP3	0.737	P1_P2_P3_P4_Lumbar_Coeliac_Sphenopalatine_VS_Stellate	1	1	1	1	1	1	0	1
ABCA5	0.737	P1_P2_P3_P4_Lumbar_Coeliac_Sphenopalatine_VS_Stellate	1	1	1	1	1	1	0	1
ZDBF2	0.736	P1_P2_P3_P4_Lumbar_Coeliac_Sphenopalatine_VS_Stellate	1	1	1	1	1	1	0	1
ATR	0.736	P1_P2_P3_P4_Lumbar_Coeliac_Sphenopalatine_VS_Stellate	1	1	1	1	1	1	0	1
CLVS2	0.735	Lumbar_VS_P1_P2_P3_P4_Coeliac_Stellate_Sphenopalatine	0	0	0	0	1	0	0	0
MTERF3	0.735	Coeliac_VS_P1_P2_P3_P4_Lumbar_Stellate_Sphenopalatine	0	0	0	0	0	1	0	0
KCNH8	0.735	P1_P3_Lumbar_Coeliac_VS_P2_P4_Stellate_Sphenopalatine	1	0	1	0	1	1	0	0
KCNK4	0.735	P4_Sphenopalatine_VS_P1_P2_P3_Lumbar_Coeliac_Stellate	0	0	0	1	0	0	0	1
LTB	0.735	P1_P2_Lumbar_Coeliac_Sphenopalatine_VS_P3_P4_Stellate	1	1	0	0	1	1	0	1
TAOK2	0.735	P1_P2_P3_P4_Lumbar_Coeliac_Sphenopalatine_VS_Stellate	1	1	1	1	1	1	0	1
XRN1	0.735	P1_P2_P3_P4_Lumbar_Coeliac_Sphenopalatine_VS_Stellate	1	1	1	1	1	1	0	1
SOS2	0.735	P1_P2_P3_P4_Lumbar_Coeliac_Sphenopalatine_VS_Stellate	1	1	1	1	1	1	0	1
2310040G24RIK	0.734	Lumbar_VS_P1_P2_P3_P4_Coeliac_Stellate_Sphenopalatine	0	0	0	0	1	0	0	0
TASOR2	0.734	Lumbar_Coeliac_VS_P1_P2_P3_P4_Stellate_Sphenopalatine	0	0	0	0	1	1	0	0
PARG	0.734	P1_P2_P3_P4_Lumbar_Coeliac_Sphenopalatine_VS_Stellate	1	1	1	1	1	1	0	1
KIF26A	0.734	P1_P2_P3_Lumbar_Coeliac_Stellate_Sphenopalatine_VS_P4	1	1	1	0	1	1	1	1
RASD2	0.733	P3_VS_P1_P2_P4_Lumbar_Coeliac_Stellate_Sphenopalatine	0	0	1	0	0	0	0	0
DUSP10	0.733	P3_Lumbar_Coeliac_Stellate_VS_P1_P2_P4_Sphenopalatine	0	0	1	0	1	1	1	0
TBC1D12	0.733	P1_P2_P3_P4_Lumbar_Coeliac_Sphenopalatine_VS_Stellate	1	1	1	1	1	1	0	1
LCOR	0.732	Lumbar_Coeliac_VS_P1_P2_P3_P4_Stellate_Sphenopalatine	0	0	0	0	1	1	0	0
STIM1	0.732	P1_P2_P3_P4_Lumbar_Coeliac_Sphenopalatine_VS_Stellate	1	1	1	1	1	1	0	1
TLE2	0.731	P1_P2_P3_Lumbar_Coeliac_Sphenopalatine_VS_P4_Stellate	1	1	1	0	1	1	0	1
HS3ST4	0.73	P2_VS_P1_P3_P4_Lumbar_Coeliac_Stellate_Sphenopalatine	0	1	0	0	0	0	0	0
GRM4	0.73	P2_VS_P1_P3_P4_Lumbar_Coeliac_Stellate_Sphenopalatine	0	1	0	0	0	0	0	0
WFS1	0.73	P1_P2_P3_P4_Lumbar_Coeliac_Sphenopalatine_VS_Stellate	1	1	1	1	1	1	0	1
2810032G03RIK	0.729	Lumbar_VS_P1_P2_P3_P4_Coeliac_Stellate_Sphenopalatine	0	0	0	0	1	0	0	0
PHLDB2	0.729	Lumbar_VS_P1_P2_P3_P4_Coeliac_Stellate_Sphenopalatine	0	0	0	0	1	0	0	0
PPP1R12B	0.729	P1_P2_P3_P4_Lumbar_Coeliac_Sphenopalatine_VS_Stellate	1	1	1	1	1	1	0	1
DNAJC1	0.729	P1_P2_P3_P4_Lumbar_Coeliac_Sphenopalatine_VS_Stellate	1	1	1	1	1	1	0	1
IL11RA1	0.728	P1_P2_P3_P4_Sphenopalatine_VS_Lumbar_Coeliac_Stellate	1	1	1	1	0	0	0	1
PHLPP1	0.728	P1_P2_P3_P4_Lumbar_Coeliac_Sphenopalatine_VS_Stellate	1	1	1	1	1	1	0	1
FNBP1	0.728	P1_P2_P3_P4_Lumbar_Coeliac_Sphenopalatine_VS_Stellate	1	1	1	1	1	1	0	1
ZFP362	0.728	P1_P2_P3_P4_Lumbar_Coeliac_Sphenopalatine_VS_Stellate	1	1	1	1	1	1	0	1
TJP1	0.728	P1_P2_P3_P4_Lumbar_Coeliac_Sphenopalatine_VS_Stellate	1	1	1	1	1	1	0	1
GM43581	0.727	P2_VS_P1_P3_P4_Lumbar_Coeliac_Stellate_Sphenopalatine	0	1	0	0	0	0	0	0
SMARCAD1	0.727	Lumbar_Coeliac_VS_P1_P2_P3_P4_Stellate_Sphenopalatine	0	0	0	0	1	1	0	0
TNFSF12	0.727	P1_P2_P3_P4_Lumbar_Coeliac_Sphenopalatine_VS_Stellate	1	1	1	1	1	1	0	1
COX6B2	0.726	P2_VS_P1_P3_P4_Lumbar_Coeliac_Stellate_Sphenopalatine	0	1	0	0	0	0	0	0
WDR35	0.726	P1_P2_P3_P4_Lumbar_Coeliac_Sphenopalatine_VS_Stellate	1	1	1	1	1	1	0	1
RPGRIP1L	0.725	Lumbar_Coeliac_VS_P1_P2_P3_P4_Stellate_Sphenopalatine	0	0	0	0	1	1	0	0
2610037D02RIK	0.725	P1_P2_P3_P4_Lumbar_Coeliac_Sphenopalatine_VS_Stellate	1	1	1	1	1	1	0	1
RASSF3	0.724	P3_VS_P1_P2_P4_Lumbar_Coeliac_Stellate_Sphenopalatine	0	0	1	0	0	0	0	0
COL5A3	0.724	Lumbar_VS_P1_P2_P3_P4_Coeliac_Stellate_Sphenopalatine	0	0	0	0	1	0	0	0
ZFP395	0.724	P1_P2_P3_P4_Lumbar_Coeliac_VS_Stellate_Sphenopalatine	1	1	1	1	1	1	0	0
FOXN2	0.724	P1_P2_P3_P4_Lumbar_Coeliac_VS_Stellate_Sphenopalatine	1	1	1	1	1	1	0	0
ASXL3	0.724	P1_P2_P3_P4_Lumbar_Coeliac_Sphenopalatine_VS_Stellate	1	1	1	1	1	1	0	1
GRIN2D	0.723	P2_P4_VS_P1_P3_Lumbar_Coeliac_Stellate_Sphenopalatine	0	1	0	1	0	0	0	0
FGFR1	0.723	P1_P2_P3_P4_Sphenopalatine_VS_Lumbar_Coeliac_Stellate	1	1	1	1	0	0	0	1
IARS2	0.723	P1_P2_P3_P4_Lumbar_Coeliac_Sphenopalatine_VS_Stellate	1	1	1	1	1	1	0	1
TSC22D2	0.723	P1_P2_P3_P4_Lumbar_Coeliac_Sphenopalatine_VS_Stellate	1	1	1	1	1	1	0	1
FRRS1L	0.723	P1_P2_P3_P4_Lumbar_Coeliac_Sphenopalatine_VS_Stellate	1	1	1	1	1	1	0	1
SLF1	0.723	P1_P2_P3_P4_Lumbar_Coeliac_Sphenopalatine_VS_Stellate	1	1	1	1	1	1	0	1
SMC2	0.722	Lumbar_Coeliac_VS_P1_P2_P3_P4_Stellate_Sphenopalatine	0	0	0	0	1	1	0	0
ZC3H12C	0.722	Lumbar_Coeliac_VS_P1_P2_P3_P4_Stellate_Sphenopalatine	0	0	0	0	1	1	0	0
CAVIN4	0.722	P2_P3_Lumbar_Coeliac_VS_P1_P4_Stellate_Sphenopalatine	0	1	1	0	1	1	0	0
WDR92	0.721	Lumbar_Coeliac_VS_P1_P2_P3_P4_Stellate_Sphenopalatine	0	0	0	0	1	1	0	0
SRBD1	0.721	Lumbar_Coeliac_VS_P1_P2_P3_P4_Stellate_Sphenopalatine	0	0	0	0	1	1	0	0
RMND5A	0.721	P1_P2_P3_P4_Lumbar_Coeliac_Sphenopalatine_VS_Stellate	1	1	1	1	1	1	0	1
VWA5A	0.721	P1_P2_P3_P4_Lumbar_Coeliac_Sphenopalatine_VS_Stellate	1	1	1	1	1	1	0	1
6720427I07RIK	0.721	P1_P2_P3_P4_Lumbar_Coeliac_Sphenopalatine_VS_Stellate	1	1	1	1	1	1	0	1
CTXN2	0.721	P1_P3_P4_Lumbar_Coeliac_Stellate_Sphenopalatine_VS_P2	1	0	1	1	1	1	1	1
TEX9	0.72	Lumbar_Coeliac_VS_P1_P2_P3_P4_Stellate_Sphenopalatine	0	0	0	0	1	1	0	0
PAK7	0.719	Lumbar_Coeliac_VS_P1_P2_P3_P4_Stellate_Sphenopalatine	0	0	0	0	1	1	0	0
TRPS1	0.719	P1_P4_Lumbar_Coeliac_VS_P2_P3_Stellate_Sphenopalatine	1	0	0	1	1	1	0	0
BEND7	0.719	P1_P2_P3_P4_Lumbar_Coeliac_Sphenopalatine_VS_Stellate	1	1	1	1	1	1	0	1
SMURF2	0.719	P1_P2_P3_P4_Lumbar_Coeliac_Sphenopalatine_VS_Stellate	1	1	1	1	1	1	0	1
TENM2	0.719	P1_P2_P4_Lumbar_Coeliac_Stellate_Sphenopalatine_VS_P3	1	1	0	1	1	1	1	1
RAB3IL1	0.718	Lumbar_VS_P1_P2_P3_P4_Coeliac_Stellate_Sphenopalatine	0	0	0	0	1	0	0	0
ZHX3	0.718	P1_P2_P3_P4_Lumbar_Coeliac_Sphenopalatine_VS_Stellate	1	1	1	1	1	1	0	1
VPS33B	0.718	P1_P2_P3_P4_Lumbar_Coeliac_Sphenopalatine_VS_Stellate	1	1	1	1	1	1	0	1
CCDC66	0.718	P1_P2_P3_P4_Lumbar_Coeliac_Sphenopalatine_VS_Stellate	1	1	1	1	1	1	0	1
ESCO1	0.717	Lumbar_Coeliac_VS_P1_P2_P3_P4_Stellate_Sphenopalatine	0	0	0	0	1	1	0	0
FGD1	0.717	P1_P2_P3_P4_Lumbar_Coeliac_Sphenopalatine_VS_Stellate	1	1	1	1	1	1	0	1
TRIP10	0.716	Lumbar_VS_P1_P2_P3_P4_Coeliac_Stellate_Sphenopalatine	0	0	0	0	1	0	0	0
RAB3GAP1	0.716	P1_P2_P3_P4_Lumbar_Coeliac_Sphenopalatine_VS_Stellate	1	1	1	1	1	1	0	1
PRKDC	0.716	P1_P2_P3_P4_Lumbar_Coeliac_Sphenopalatine_VS_Stellate	1	1	1	1	1	1	0	1
CAMK4	0.716	P1_P2_P3_P4_Lumbar_Coeliac_Sphenopalatine_VS_Stellate	1	1	1	1	1	1	0	1
PPFIA4	0.715	P1_P2_P3_P4_Lumbar_Coeliac_Sphenopalatine_VS_Stellate	1	1	1	1	1	1	0	1
DLG1	0.715	P1_P2_P3_P4_Lumbar_Coeliac_Sphenopalatine_VS_Stellate	1	1	1	1	1	1	0	1
PANK4	0.714	P1_P2_P3_P4_Lumbar_Coeliac_Sphenopalatine_VS_Stellate	1	1	1	1	1	1	0	1
DERA	0.713	P3_P4_Lumbar_Coeliac_VS_P1_P2_Stellate_Sphenopalatine	0	0	1	1	1	1	0	0
GM16701.1	0.713	P1_P2_P3_P4_Lumbar_Coeliac_VS_Stellate_Sphenopalatine	1	1	1	1	1	1	0	0
SORT1	0.713	P1_P2_P3_P4_Lumbar_Coeliac_Sphenopalatine_VS_Stellate	1	1	1	1	1	1	0	1
CLEC2L	0.713	P1_P2_P3_P4_Lumbar_Coeliac_Sphenopalatine_VS_Stellate	1	1	1	1	1	1	0	1
SMG6	0.713	P1_P2_P3_P4_Lumbar_Coeliac_Sphenopalatine_VS_Stellate	1	1	1	1	1	1	0	1
GJD2	0.713	P1_P3_P4_Lumbar_Coeliac_Stellate_Sphenopalatine_VS_P2	1	0	1	1	1	1	1	1
BDP1	0.712	P1_P2_P3_P4_Lumbar_Coeliac_Sphenopalatine_VS_Stellate	1	1	1	1	1	1	0	1
USP3	0.711	Lumbar_Coeliac_VS_P1_P2_P3_P4_Stellate_Sphenopalatine	0	0	0	0	1	1	0	0
ABCC9	0.711	Sphenopalatine_VS_P1_P2_P3_P4_Lumbar_Coeliac_Stellate	0	0	0	0	0	0	0	1
DSEL	0.711	P1_P2_P3_P4_Lumbar_Coeliac_Sphenopalatine_VS_Stellate	1	1	1	1	1	1	0	1
FRMD3	0.711	P1_P2_P3_P4_Lumbar_Coeliac_Sphenopalatine_VS_Stellate	1	1	1	1	1	1	0	1
ZFP36	0.71	P1_P2_P4_VS_P3_Lumbar_Coeliac_Stellate_Sphenopalatine	1	1	0	1	0	0	0	0
TSHZ2	0.71	P1_P2_P3_Lumbar_Coeliac_Sphenopalatine_VS_P4_Stellate	1	1	1	0	1	1	0	1
CPNE8	0.709	P1_VS_P2_P3_P4_Lumbar_Coeliac_Stellate_Sphenopalatine	1	0	0	0	0	0	0	0
ZFP658	0.709	Lumbar_Coeliac_VS_P1_P2_P3_P4_Stellate_Sphenopalatine	0	0	0	0	1	1	0	0
FBXO30	0.709	Lumbar_Coeliac_VS_P1_P2_P3_P4_Stellate_Sphenopalatine	0	0	0	0	1	1	0	0
CHPT1	0.709	P1_P2_P3_P4_Lumbar_Coeliac_VS_Stellate_Sphenopalatine	1	1	1	1	1	1	0	0
IPMK	0.708	P1_P2_P3_P4_Lumbar_Coeliac_Sphenopalatine_VS_Stellate	1	1	1	1	1	1	0	1
GCHFR	0.707	P3_VS_P1_P2_P4_Lumbar_Coeliac_Stellate_Sphenopalatine	0	0	1	0	0	0	0	0
JPH1	0.707	Lumbar_Coeliac_VS_P1_P2_P3_P4_Stellate_Sphenopalatine	0	0	0	0	1	1	0	0
FBXO41	0.707	P1_P2_P3_P4_Lumbar_Coeliac_Sphenopalatine_VS_Stellate	1	1	1	1	1	1	0	1
NCKAP5L	0.707	P1_P2_P3_P4_Lumbar_Coeliac_Sphenopalatine_VS_Stellate	1	1	1	1	1	1	0	1
ZDHHC22	0.706	P4_Sphenopalatine_VS_P1_P2_P3_Lumbar_Coeliac_Stellate	0	0	0	1	0	0	0	1
PPFIA3	0.706	P1_P2_P3_P4_Lumbar_Coeliac_Sphenopalatine_VS_Stellate	1	1	1	1	1	1	0	1
TEAD1	0.705	P1_P2_P3_P4_Lumbar_Coeliac_Sphenopalatine_VS_Stellate	1	1	1	1	1	1	0	1
WAPL	0.705	P1_P2_P3_P4_Lumbar_Coeliac_Sphenopalatine_VS_Stellate	1	1	1	1	1	1	0	1
A4GALT	0.705	P1_P2_P3_P4_Lumbar_Coeliac_Sphenopalatine_VS_Stellate	1	1	1	1	1	1	0	1
DDX3Y	0.705	P1_P2_P3_P4_Lumbar_Coeliac_Sphenopalatine_VS_Stellate	1	1	1	1	1	1	0	1
TATDN2	0.704	P1_P2_P3_P4_Lumbar_Coeliac_Sphenopalatine_VS_Stellate	1	1	1	1	1	1	0	1
LZIC	0.703	Lumbar_Coeliac_VS_P1_P2_P3_P4_Stellate_Sphenopalatine	0	0	0	0	1	1	0	0
KCNMB4OS2	0.703	Lumbar_Coeliac_VS_P1_P2_P3_P4_Stellate_Sphenopalatine	0	0	0	0	1	1	0	0
GPC1	0.703	P1_P2_P3_P4_Lumbar_Coeliac_Sphenopalatine_VS_Stellate	1	1	1	1	1	1	0	1
HS2ST1	0.703	P1_P2_P3_P4_Lumbar_Coeliac_Sphenopalatine_VS_Stellate	1	1	1	1	1	1	0	1
SIK3	0.703	P1_P2_P3_P4_Lumbar_Coeliac_Sphenopalatine_VS_Stellate	1	1	1	1	1	1	0	1
SDC2	0.702	P1_P2_P3_P4_Lumbar_Coeliac_Stellate_VS_Sphenopalatine	1	1	1	1	1	1	1	0
DCBLD2	0.702	P1_P2_P4_Lumbar_Coeliac_Sphenopalatine_VS_P3_Stellate	1	1	0	1	1	1	0	1
WWP1	0.702	P1_P2_P3_P4_Lumbar_Coeliac_Sphenopalatine_VS_Stellate	1	1	1	1	1	1	0	1
SEMA4C	0.701	Lumbar_VS_P1_P2_P3_P4_Coeliac_Stellate_Sphenopalatine	0	0	0	0	1	0	0	0
SOX5	0.701	Lumbar_VS_P1_P2_P3_P4_Coeliac_Stellate_Sphenopalatine	0	0	0	0	1	0	0	0
FOXO6	0.701	Coeliac_VS_P1_P2_P3_P4_Lumbar_Stellate_Sphenopalatine	0	0	0	0	0	1	0	0
KIN	0.701	Lumbar_Coeliac_VS_P1_P2_P3_P4_Stellate_Sphenopalatine	0	0	0	0	1	1	0	0
DDX55	0.701	Lumbar_Coeliac_VS_P1_P2_P3_P4_Stellate_Sphenopalatine	0	0	0	0	1	1	0	0
RBM41	0.701	Lumbar_Coeliac_VS_P1_P2_P3_P4_Stellate_Sphenopalatine	0	0	0	0	1	1	0	0
SPSB1	0.701	P1_P2_Lumbar_Coeliac_Sphenopalatine_VS_P3_P4_Stellate	1	1	0	0	1	1	0	1
KAT6B	0.701	P1_P2_P3_P4_Lumbar_Coeliac_Sphenopalatine_VS_Stellate	1	1	1	1	1	1	0	1
SPARC	0.7	P1_P2_P3_P4_Coeliac_Stellate_Sphenopalatine_VS_Lumbar	1	1	1	1	0	1	1	1
RCN1	0.699	P1_P2_P4_VS_P3_Lumbar_Coeliac_Stellate_Sphenopalatine	1	1	0	1	0	0	0	0
EML6	0.699	P1_P2_P3_P4_Lumbar_Coeliac_Sphenopalatine_VS_Stellate	1	1	1	1	1	1	0	1
DMXL1	0.699	P1_P2_P3_P4_Lumbar_Coeliac_Sphenopalatine_VS_Stellate	1	1	1	1	1	1	0	1
AI837181	0.699	P1_P2_P3_P4_Lumbar_Coeliac_Sphenopalatine_VS_Stellate	1	1	1	1	1	1	0	1
PPFIA1	0.698	P1_P2_P3_P4_Lumbar_Coeliac_Sphenopalatine_VS_Stellate	1	1	1	1	1	1	0	1
LEMD3	0.698	P1_P2_P3_P4_Lumbar_Coeliac_Sphenopalatine_VS_Stellate	1	1	1	1	1	1	0	1
ATP13A3	0.698	P1_P2_P3_P4_Lumbar_Coeliac_Sphenopalatine_VS_Stellate	1	1	1	1	1	1	0	1
2700049A03RIK	0.697	P4_Lumbar_Coeliac_VS_P1_P2_P3_Stellate_Sphenopalatine	0	0	0	1	1	1	0	0
COL4A2	0.697	Sphenopalatine_VS_P1_P2_P3_P4_Lumbar_Coeliac_Stellate	0	0	0	0	0	0	0	1
DKK3	0.697	P4_Sphenopalatine_VS_P1_P2_P3_Lumbar_Coeliac_Stellate	0	0	0	1	0	0	0	1
LUZP1	0.697	P1_P2_P3_P4_Lumbar_Coeliac_Sphenopalatine_VS_Stellate	1	1	1	1	1	1	0	1
JMY	0.697	P1_P2_P3_P4_Lumbar_Coeliac_Sphenopalatine_VS_Stellate	1	1	1	1	1	1	0	1
NYNRIN	0.697	P1_P2_P3_P4_Lumbar_Coeliac_Sphenopalatine_VS_Stellate	1	1	1	1	1	1	0	1
CNTN1	0.697	P2_P3_P4_Lumbar_Coeliac_Stellate_Sphenopalatine_VS_P1	0	1	1	1	1	1	1	1
PROKR1	0.696	P1_VS_P2_P3_P4_Lumbar_Coeliac_Stellate_Sphenopalatine	1	0	0	0	0	0	0	0
B230369F24RIK	0.696	Lumbar_Coeliac_VS_P1_P2_P3_P4_Stellate_Sphenopalatine	0	0	0	0	1	1	0	0
PPM1D	0.696	P1_P2_P3_P4_Lumbar_Coeliac_VS_Stellate_Sphenopalatine	1	1	1	1	1	1	0	0
HPCA	0.696	P1_P2_P3_P4_Lumbar_Coeliac_Stellate_VS_Sphenopalatine	1	1	1	1	1	1	1	0
LIFR	0.696	P1_P2_P3_P4_Lumbar_Coeliac_Stellate_VS_Sphenopalatine	1	1	1	1	1	1	1	0
USP24	0.696	P1_P2_P3_P4_Lumbar_Coeliac_Sphenopalatine_VS_Stellate	1	1	1	1	1	1	0	1
ZFP354C	0.696	P1_P2_P3_P4_Lumbar_Coeliac_Sphenopalatine_VS_Stellate	1	1	1	1	1	1	0	1
ATXN3	0.696	P1_P2_P3_P4_Lumbar_Coeliac_Sphenopalatine_VS_Stellate	1	1	1	1	1	1	0	1
ZBTB6	0.695	Coeliac_VS_P1_P2_P3_P4_Lumbar_Stellate_Sphenopalatine	0	0	0	0	0	1	0	0
INSM1	0.695	Coeliac_VS_P1_P2_P3_P4_Lumbar_Stellate_Sphenopalatine	0	0	0	0	0	1	0	0
SLC16A1	0.695	P1_P2_P3_P4_Lumbar_Coeliac_Stellate_VS_Sphenopalatine	1	1	1	1	1	1	1	0
GALNT14	0.695	P1_P2_P4_Lumbar_Coeliac_Sphenopalatine_VS_P3_Stellate	1	1	0	1	1	1	0	1
SLC22A15	0.695	P1_P2_P3_P4_Lumbar_Coeliac_Sphenopalatine_VS_Stellate	1	1	1	1	1	1	0	1
KCNC3	0.695	P1_P2_P3_P4_Lumbar_Coeliac_Sphenopalatine_VS_Stellate	1	1	1	1	1	1	0	1
6430548M08RIK	0.695	P1_P2_P3_P4_Lumbar_Coeliac_Sphenopalatine_VS_Stellate	1	1	1	1	1	1	0	1
CDK12	0.695	P1_P2_P3_P4_Lumbar_Coeliac_Sphenopalatine_VS_Stellate	1	1	1	1	1	1	0	1
GLCCI1	0.694	P1_P2_P3_P4_Lumbar_Coeliac_Sphenopalatine_VS_Stellate	1	1	1	1	1	1	0	1
CEP295	0.694	P1_P2_P3_P4_Lumbar_Coeliac_Sphenopalatine_VS_Stellate	1	1	1	1	1	1	0	1
CEP126	0.693	Lumbar_VS_P1_P2_P3_P4_Coeliac_Stellate_Sphenopalatine	0	0	0	0	1	0	0	0
VGLL4	0.693	Lumbar_Coeliac_VS_P1_P2_P3_P4_Stellate_Sphenopalatine	0	0	0	0	1	1	0	0
GM16183	0.693	Lumbar_Coeliac_VS_P1_P2_P3_P4_Stellate_Sphenopalatine	0	0	0	0	1	1	0	0
NIM1K	0.693	P1_P2_P3_P4_Lumbar_Coeliac_Stellate_VS_Sphenopalatine	1	1	1	1	1	1	1	0
VIRMA	0.693	P1_P2_P3_P4_Lumbar_Coeliac_Sphenopalatine_VS_Stellate	1	1	1	1	1	1	0	1
RBM11	0.693	P1_P2_P3_P4_Lumbar_Coeliac_Sphenopalatine_VS_Stellate	1	1	1	1	1	1	0	1
PTAR1	0.693	P1_P2_P3_P4_Lumbar_Coeliac_Sphenopalatine_VS_Stellate	1	1	1	1	1	1	0	1
SNX19	0.692	P1_P2_P3_P4_Lumbar_Coeliac_Sphenopalatine_VS_Stellate	1	1	1	1	1	1	0	1
MT2	0.691	P3_P4_Sphenopalatine_VS_P1_P2_Lumbar_Coeliac_Stellate	0	0	1	1	0	0	0	1
MINK1	0.691	P1_P2_P3_P4_Lumbar_Coeliac_Sphenopalatine_VS_Stellate	1	1	1	1	1	1	0	1
B3GALT1	0.69	P1_P2_P3_P4_Lumbar_Coeliac_Stellate_VS_Sphenopalatine	1	1	1	1	1	1	1	0
ENDOD1	0.69	P1_P2_P3_P4_Lumbar_Coeliac_Sphenopalatine_VS_Stellate	1	1	1	1	1	1	0	1
HYOU1	0.69	P1_P2_P3_P4_Lumbar_Coeliac_Sphenopalatine_VS_Stellate	1	1	1	1	1	1	0	1
NUCB2	0.688	Lumbar_Coeliac_VS_P1_P2_P3_P4_Stellate_Sphenopalatine	0	0	0	0	1	1	0	0
A130014A01RIK	0.688	Lumbar_Coeliac_VS_P1_P2_P3_P4_Stellate_Sphenopalatine	0	0	0	0	1	1	0	0
PRKD3	0.688	Lumbar_Coeliac_VS_P1_P2_P3_P4_Stellate_Sphenopalatine	0	0	0	0	1	1	0	0
TMEM176A	0.688	P1_P2_P3_P4_Lumbar_Coeliac_Sphenopalatine_VS_Stellate	1	1	1	1	1	1	0	1
CDKL5	0.687	P1_P2_P3_P4_Lumbar_Coeliac_VS_Stellate_Sphenopalatine	1	1	1	1	1	1	0	0
KCNQ3	0.687	P1_P2_P3_P4_Lumbar_Coeliac_Stellate_VS_Sphenopalatine	1	1	1	1	1	1	1	0
RPRD1B	0.687	P1_P2_P3_P4_Lumbar_Coeliac_Sphenopalatine_VS_Stellate	1	1	1	1	1	1	0	1
ATP11A	0.687	P1_P2_P3_P4_Lumbar_Coeliac_Sphenopalatine_VS_Stellate	1	1	1	1	1	1	0	1
LOR	0.686	P3_VS_P1_P2_P4_Lumbar_Coeliac_Stellate_Sphenopalatine	0	0	1	0	0	0	0	0
[truncated: 5,594 more rows]
